# Supplementary material for: A new approach for rare variation collapsing on functional protein domains implicates specific genic regions in ALS
Source: HighWire-hosted journal article supplement (doi:10.1101/gr.243592.118), 2019-04-02
Supplement: Supplemental_Table_S2.xlsx [file Supplemental_Table_S2.xlsx]

## Sheet: supplementaryTableS2
Supplementary Table S2. Domains summary using Caucasian population
Rank	Domain Name	Qualified Case	Unqualified Case	Qualified Case Freq	Qualified Ctrl	Unqualified Ctrl	Qualified Ctrl Freq	Enriched Direction	Fet P
1	SOD1_238186_238186_0	40	3053	0.0129	6	8180	0.000733	case	4.11e-17
2	TARDBP_-_-_2	21	3072	0.0068	8	8178	0.000977	case	5.84e-07
3	FUS_-_-_2	12	3081	0.0039	3	8183	0.000367	case	3.39e-05
4	PKP4_237987_237987_1	19	3074	0.0061	11	8175	0.0013	case	4.14e-05
5	SLC39A12_251357_251357_0	0	3093	0	30	8156	0.0037	ctrl	0.000107
6	CPNE1_-_-_2	7	3086	0.0023	0	8186	0	case	0.000116
7	KIAA1549_-_-_1	22	3071	0.0071	133	8053	0.0162	ctrl	0.000122
8	FLNC_214720_214720_0	14	3079	0.0045	7	8179	0.000855	case	0.000199
9	GUCY2D_107366_107366_0	3	3090	0.00097	48	8138	0.0059	ctrl	0.000202
10	ZNF345_257789_257789_7	12	3081	0.0039	5	8181	0.000611	case	0.000259
11	LGALSL_214904_214904_0	9	3084	0.0029	2	8184	0.000244	case	0.000272
12	BMP15_214556_214556_0	9	3084	0.0029	2	8184	0.000244	case	0.000272
13	DNMT3A_-_-_0	9	3084	0.0029	2	8184	0.000244	case	0.000272
14	ITM2C_-_-_1	16	3077	0.0052	10	8176	0.0012	case	0.000276
15	ZNF165_-_-_1	11	3082	0.0036	4	8182	0.000489	case	0.000281
16	WISP1_-_-_3	11	3082	0.0036	4	8182	0.000489	case	0.000281
17	ARAP3_-_-_2	10	3083	0.0032	3	8183	0.000367	case	0.000289
18	AOX1_-_-_5	10	3083	0.0032	3	8183	0.000367	case	0.000289
19	TRAPPC1_146632_146632_0	18	3075	0.0058	13	8173	0.0016	case	0.000369
20	MKI67_-_-_4	6	3087	0.0019	0	8186	0	case	0.000424
21	HIST1H2BL_197718_197718_0	6	3087	0.0019	0	8186	0	case	0.000424
22	TCEB2_176383_176383_0	0	3093	0	25	8161	0.0031	ctrl	0.00047
23	C7_-_-_1	0	3093	0	25	8161	0.0031	ctrl	0.00047
24	CCDC74B_259053_259053_0	13	3080	0.0042	7	8179	0.000855	case	0.000492
25	CA2_239393_239393_0	18	3075	0.0058	14	8172	0.0017	case	0.000581
26	ENOSF1_239440_239440_0	35	3058	0.0113	41	8145	0.005	case	0.000659
27	NMNAT1_-_-_1	11	3082	0.0036	5	8181	0.000611	case	0.000677
28	PNPLA4_132861_132861_0	3	3090	0.00097	42	8144	0.0051	ctrl	0.0007
29	MPDU1_-_-_0	7	3086	0.0023	1	8185	0.000122	case	0.000706
30	SUSD5_249573_249573_0	7	3086	0.0023	1	8185	0.000122	case	0.000706
31	BMS1_-_-_1	16	3077	0.0052	99	8087	0.0121	ctrl	0.000708
32	NAV2_-_-_2	14	3079	0.0045	9	8177	0.0011	case	0.000783
33	UBQLNL_176403_176403_0	0	3093	0	24	8162	0.0029	ctrl	0.000789
34	EXOC5_254184_254184_0	0	3093	0	24	8162	0.0029	ctrl	0.000789
35	C11orf94_-_-_0	8	3085	0.0026	2	8184	0.000244	case	0.00082
36	ZNF862_214630_214630_0	8	3085	0.0026	2	8184	0.000244	case	0.00082
37	KCNH4_237999_237999_0	8	3085	0.0026	2	8184	0.000244	case	0.00082
38	MDGA2_143208_143208_1	9	3084	0.0029	3	8183	0.000367	case	0.000822
39	CENPT_259642_259642_1	2	3091	0.000647	36	8150	0.0044	ctrl	0.000852
40	INPP4B_-_-_0	9	3084	0.0029	70	8116	0.0086	ctrl	0.000864
41	TLR2_214587_214587_0	2	3091	0.000647	37	8149	0.0045	ctrl	0.000875
42	ANO9_252663_252663_0	22	3071	0.0071	121	8065	0.0148	ctrl	0.000887
43	RGL3_238087_238087_0	19	3074	0.0061	16	8170	0.002	case	0.000889
44	UBR5_-_-_3	31	3062	0.01	36	8150	0.0044	case	0.000899
45	ALOX5_249757_249757_0	31	3062	0.01	36	8150	0.0044	case	0.000899
46	UNC13A_-_-_5	10	3083	0.0032	72	8114	0.0088	ctrl	0.0011
47	GOLGA4_-_-_0	46	3047	0.0149	202	7984	0.0247	ctrl	0.0012
48	IFT74_-_-_0	54	3039	0.0175	80	8106	0.0098	case	0.0012
49	LRRC16A_238064_238064_0	0	3093	0	22	8164	0.0027	ctrl	0.0013
50	ZRANB3_-_-_3	0	3093	0	22	8164	0.0027	ctrl	0.0013
51	PPP6R2_-_-_0	0	3093	0	22	8164	0.0027	ctrl	0.0013
52	VNN1_-_-_0	0	3093	0	22	8164	0.0027	ctrl	0.0013
53	ASB14_239700_239700_0	0	3093	0	22	8164	0.0027	ctrl	0.0013
54	ZNF536_-_-_1	5	3088	0.0016	51	8135	0.0062	ctrl	0.0013
55	NDEL1_252852_252852_0	11	3082	0.0036	6	8180	0.000733	case	0.0014
56	C9orf96_-_-_1	11	3082	0.0036	6	8180	0.000733	case	0.0014
57	PRELP_238064_238064_0	11	3082	0.0036	6	8180	0.000733	case	0.0014
58	ARID1B_-_-_0	20	3073	0.0065	110	8076	0.0134	ctrl	0.0015
59	GALNT13_133004_133004_0	1	3092	0.000323	28	8158	0.0034	ctrl	0.0015
60	NOSTRIN_-_-_2	1	3092	0.000323	28	8158	0.0034	ctrl	0.0015
61	MTR_239020_239020_0	1	3092	0.000323	29	8157	0.0035	ctrl	0.0015
62	CYR61_109076_109076_0	5	3088	0.0016	0	8186	0	case	0.0015
63	NFKBIB_238125_238125_0	5	3088	0.0016	0	8186	0	case	0.0015
64	NHP2_250474_250474_0	3	3090	0.00097	39	8147	0.0048	ctrl	0.0016
65	PCDHA3_206637_206637_4	10	3083	0.0032	5	8181	0.000611	case	0.0017
66	TXNDC15_239297_239297_0	10	3083	0.0032	5	8181	0.000611	case	0.0017
67	STK38L_173716_173716_0	10	3083	0.0032	5	8181	0.000611	case	0.0017
68	REV3L_99917_99917_0	17	3076	0.0055	14	8172	0.0017	case	0.0018
69	HFE2_253786_253786_0	4	3089	0.0013	44	8142	0.0054	ctrl	0.0018
70	MMP14_239805_239805_0	20	3073	0.0065	19	8167	0.0023	case	0.0018
71	TMEM206_259259_259259_0	5	3088	0.0016	48	8138	0.0059	ctrl	0.0019
72	ARHGDIB_251095_251095_0	14	3079	0.0045	10	8176	0.0012	case	0.0019
73	MST1R_133189_133189_0	32	3061	0.0103	39	8147	0.0048	case	0.0019
74	WWTR1_-_-_0	2	3091	0.000647	33	8153	0.004	ctrl	0.002
75	ACTRT1_173506_173506_0	2	3091	0.000647	33	8153	0.004	ctrl	0.002
76	SNW1_-_-_1	9	3084	0.0029	4	8182	0.000489	case	0.002
77	TMC6_254445_254445_0	0	3093	0	20	8166	0.0024	ctrl	0.0021
78	ANKRD12_-_-_0	0	3093	0	20	8166	0.0024	ctrl	0.0021
79	TTN_-_-_218	0	3093	0	20	8166	0.0024	ctrl	0.0021
80	TBC1D28_-_-_0	0	3093	0	21	8165	0.0026	ctrl	0.0022
81	FAT2_206637_206637_13	6	3087	0.0019	1	8185	0.000122	case	0.0023
82	FBLN1_-_-_8	6	3087	0.0019	1	8185	0.000122	case	0.0023
83	EXT2_-_-_2	6	3087	0.0019	1	8185	0.000122	case	0.0023
84	CNPY4_-_-_0	6	3087	0.0019	1	8185	0.000122	case	0.0023
85	SLIT2_214507_214507_1	6	3087	0.0019	1	8185	0.000122	case	0.0023
86	SUZ12_204299_204299_0	6	3087	0.0019	1	8185	0.000122	case	0.0023
87	ZNF212_257036_257036_0	8	3085	0.0026	3	8183	0.000367	case	0.0023
88	USP27X_239125_239125_0	8	3085	0.0026	3	8183	0.000367	case	0.0023
89	C17orf70_259282_259282_0	8	3085	0.0026	3	8183	0.000367	case	0.0023
90	ULK1_-_-_1	25	3068	0.0081	125	8061	0.0153	ctrl	0.0023
91	ACIN1_-_-_1	25	3068	0.0081	125	8061	0.0153	ctrl	0.0023
92	KRT73_-_-_0	16	3077	0.0052	92	8094	0.0112	ctrl	0.0023
93	NUP160_-_-_0	65	3028	0.021	105	8081	0.0128	case	0.0023
94	VEGFC_-_-_0	1	3092	0.000323	27	8159	0.0033	ctrl	0.0023
95	FNDC3A_238020_238020_7	7	3086	0.0023	2	8184	0.000244	case	0.0024
96	BCAM_-_-_1	7	3086	0.0023	2	8184	0.000244	case	0.0024
97	OBSCN_212958_212958_0	7	3086	0.0023	2	8184	0.000244	case	0.0024
98	SLC2A13_-_-_0	7	3086	0.0023	2	8184	0.000244	case	0.0024
99	C3orf22_-_-_0	7	3086	0.0023	2	8184	0.000244	case	0.0024
100	GJA8_143818_143818_0	7	3086	0.0023	2	8184	0.000244	case	0.0024
101	PRKCD_-_-_2	7	3086	0.0023	2	8184	0.000244	case	0.0024
102	EP300_-_-_3	7	3086	0.0023	2	8184	0.000244	case	0.0024
103	LMTK3_-_-_0	8	3085	0.0026	60	8126	0.0073	ctrl	0.0025
104	COL5A1_-_-_2	8	3085	0.0026	60	8126	0.0073	ctrl	0.0025
105	CSF3R_-_-_0	4	3089	0.0013	42	8144	0.0051	ctrl	0.0026
106	OSBPL9_-_-_1	4	3089	0.0013	42	8144	0.0051	ctrl	0.0026
107	ARAP3_-_-_0	13	3080	0.0042	9	8177	0.0011	case	0.0026
108	OR2D2_258124_258124_0	13	3080	0.0042	9	8177	0.0011	case	0.0026
109	LCT_234180_234180_2	4	3089	0.0013	43	8143	0.0053	ctrl	0.0027
110	C2orf53_-_-_0	11	3082	0.0036	7	8179	0.000855	case	0.0028
111	HEATR6_-_-_1	38	3055	0.0123	53	8133	0.0065	case	0.003
112	MAP3K10_-_-_2	21	3072	0.0068	22	8164	0.0027	case	0.003
113	SLC24A4_250805_250805_0	19	3074	0.0061	19	8167	0.0023	case	0.0031
114	ACACB_190425_190425_0	19	3074	0.0061	19	8167	0.0023	case	0.0031
115	CST8_214484_214484_0	2	3091	0.000647	31	8155	0.0038	ctrl	0.0031
116	EFCAB7_-_-_1	2	3091	0.000647	32	8154	0.0039	ctrl	0.0031
117	PTPN22_-_-_0	44	3049	0.0142	65	8121	0.0079	case	0.0034
118	SPTBN5_-_-_3	0	3093	0	19	8167	0.0023	ctrl	0.0034
119	SNX14_-_-_1	0	3093	0	19	8167	0.0023	ctrl	0.0034
120	KDR_-_-_3	0	3093	0	19	8167	0.0023	ctrl	0.0034
121	TSPAN11_-_-_0	0	3093	0	19	8167	0.0023	ctrl	0.0034
122	PIR_251469_251469_0	0	3093	0	19	8167	0.0023	ctrl	0.0034
123	SLC16A13_-_-_1	10	3083	0.0032	6	8180	0.000733	case	0.0035
124	GRB14_-_-_2	10	3083	0.0032	6	8180	0.000733	case	0.0035
125	ADAM19_250707_250707_0	10	3083	0.0032	6	8180	0.000733	case	0.0035
126	OR1D2_258124_258124_0	10	3083	0.0032	6	8180	0.000733	case	0.0035
127	CD300C_143193_143193_0	10	3083	0.0032	6	8180	0.000733	case	0.0035
128	BRMS1_-_-_0	10	3083	0.0032	6	8180	0.000733	case	0.0035
129	POLR1A_259844_259844_0	12	3081	0.0039	75	8111	0.0092	ctrl	0.0035
130	MAPT_-_-_0	17	3076	0.0055	93	8093	0.0114	ctrl	0.0036
131	SUCLA2_249950_249950_0	13	3080	0.0042	10	8176	0.0012	case	0.0037
132	DCAF12L2_238121_238121_0	1	3092	0.000323	25	8161	0.0031	ctrl	0.0037
133	TEX30_226101_226101_0	1	3092	0.000323	25	8161	0.0031	ctrl	0.0037
134	MYH6_257245_257245_0	1	3092	0.000323	25	8161	0.0031	ctrl	0.0037
135	OR3A1_-_-_1	1	3092	0.000323	25	8161	0.0031	ctrl	0.0037
136	CHRNB1_251627_251627_0	1	3092	0.000323	25	8161	0.0031	ctrl	0.0037
137	NMS_-_-_0	1	3092	0.000323	25	8161	0.0031	ctrl	0.0037
138	CCR8_-_-_0	3	3090	0.00097	37	8149	0.0045	ctrl	0.0037
139	EYA3_-_-_1	21	3072	0.0068	23	8163	0.0028	case	0.0038
140	OR2M4_-_-_0	1	3092	0.000323	26	8160	0.0032	ctrl	0.0038
141	MANBA_-_-_0	21	3072	0.0068	107	8079	0.0131	ctrl	0.0038
142	GDA_238628_238628_0	7	3086	0.0023	55	8131	0.0067	ctrl	0.0038
143	DAO_233831_233831_0	4	3089	0.0013	41	8145	0.005	ctrl	0.0039
144	CDH5_206637_206637_3	12	3081	0.0039	8	8178	0.000977	case	0.0039
145	MUC22_-_-_0	5	3088	0.0016	45	8141	0.0055	ctrl	0.0039
146	EPHA10_188948_188948_0	28	3065	0.0091	35	8151	0.0043	case	0.0042
147	GRIN2A_256063_256063_0	10	3083	0.0032	66	8120	0.0081	ctrl	0.0042
148	ESAM_143286_143286_0	16	3077	0.0052	15	8171	0.0018	case	0.0042
149	CBX4_-_-_0	16	3077	0.0052	15	8171	0.0018	case	0.0042
150	ADD3_-_-_0	16	3077	0.0052	15	8171	0.0018	case	0.0042
151	CSMD2_249853_249853_7	9	3084	0.0029	5	8181	0.000611	case	0.0043
152	CEP78_-_-_0	9	3084	0.0029	5	8181	0.000611	case	0.0043
153	ASB5_238125_238125_1	9	3084	0.0029	5	8181	0.000611	case	0.0043
154	USF1_-_-_1	9	3084	0.0029	5	8181	0.000611	case	0.0043
155	PTPRH_214495_214495_1	9	3084	0.0029	5	8181	0.000611	case	0.0043
156	ZNF33B_-_-_1	9	3084	0.0029	5	8181	0.000611	case	0.0043
157	PCDHGA6_203892_203892_0	9	3084	0.0029	5	8181	0.000611	case	0.0043
158	SAFB2_-_-_1	15	3078	0.0048	13	8173	0.0016	case	0.0045
159	WDR62_-_-_2	29	3064	0.0094	134	8052	0.0164	ctrl	0.0046
160	MUC7_-_-_0	28	3065	0.0091	36	8150	0.0044	case	0.0047
161	TRIM35_128778_128778_0	2	3091	0.000647	30	8156	0.0037	ctrl	0.0047
162	LOXHD1_238854_238854_3	2	3091	0.000647	30	8156	0.0037	ctrl	0.0047
163	KRT10_-_-_0	17	3076	0.0055	92	8094	0.0112	ctrl	0.0048
164	TBC1D2B_-_-_1	8	3085	0.0026	57	8129	0.007	ctrl	0.0049
165	TTN_-_-_202	21	3072	0.0068	106	8080	0.0129	ctrl	0.0049
166	ANKRD18A_192910_192910_0	12	3081	0.0039	9	8177	0.0011	case	0.0051
167	ZNF439_-_-_3	12	3081	0.0039	9	8177	0.0011	case	0.0051
168	ZNF284_-_-_1	12	3081	0.0039	9	8177	0.0011	case	0.0051
169	ZSCAN20_257789_257789_0	20	3073	0.0065	22	8164	0.0027	case	0.0051
170	TFR2_239043_239043_0	24	3069	0.0078	29	8157	0.0035	case	0.0052
171	PKD1_-_-_16	24	3069	0.0078	29	8157	0.0035	case	0.0052
172	TNRC6B_255981_255981_0	8	3085	0.0026	4	8182	0.000489	case	0.0052
173	BOLL_-_-_1	8	3085	0.0026	4	8182	0.000489	case	0.0052
174	CUBN_238001_238001_18	8	3085	0.0026	4	8182	0.000489	case	0.0052
175	HSD17B4_-_-_2	8	3085	0.0026	4	8182	0.000489	case	0.0052
176	EXOSC10_254607_254607_0	8	3085	0.0026	4	8182	0.000489	case	0.0052
177	SCO2_-_-_1	8	3085	0.0026	4	8182	0.000489	case	0.0052
178	MAP6_-_-_0	7	3086	0.0023	52	8134	0.0064	ctrl	0.0052
179	FEZ2_254414_254414_0	7	3086	0.0023	52	8134	0.0064	ctrl	0.0052
180	DYNC2H1_254766_254766_0	11	3082	0.0036	69	8117	0.0084	ctrl	0.0053
181	CENPF_-_-_0	53	3040	0.0171	213	7973	0.026	ctrl	0.0053
182	GALNT11_-_-_0	3	3090	0.00097	34	8152	0.0042	ctrl	0.0054
183	QPRT_238806_238806_0	3	3090	0.00097	35	8151	0.0043	ctrl	0.0054
184	AKR1B15_223729_223729_0	3	3090	0.00097	35	8151	0.0043	ctrl	0.0054
185	SLC36A2_250658_250658_0	16	3077	0.0052	88	8098	0.0108	ctrl	0.0054
186	MYBPHL_143225_143225_0	13	3080	0.0042	11	8175	0.0013	case	0.0055
187	CCDC14_-_-_0	18	3075	0.0058	94	8092	0.0115	ctrl	0.0055
188	PSG3_143217_143217_1	4	3089	0.0013	39	8147	0.0048	ctrl	0.0056
189	ERBB3_-_-_7	27	3066	0.0087	34	8152	0.0042	case	0.0056
190	GSPT2_239675_239675_0	4	3089	0.0013	0	8186	0	case	0.0056
191	ZNF510_257789_257789_5	4	3089	0.0013	0	8186	0	case	0.0056
192	PHB_-_-_0	4	3089	0.0013	0	8186	0	case	0.0056
193	ZNF454_257789_257789_5	4	3089	0.0013	0	8186	0	case	0.0056
194	NEIL3_250022_250022_0	4	3089	0.0013	0	8186	0	case	0.0056
195	ZNF235_257789_257789_4	4	3089	0.0013	0	8186	0	case	0.0056
196	KMT2D_250011_250011_0	4	3089	0.0013	0	8186	0	case	0.0056
197	EVPL_197605_197605_0	4	3089	0.0013	0	8186	0	case	0.0056
198	JUN_249649_249649_0	4	3089	0.0013	0	8186	0	case	0.0056
199	FAM19A1_152455_152455_0	4	3089	0.0013	0	8186	0	case	0.0056
200	FIGN_-_-_1	4	3089	0.0013	0	8186	0	case	0.0056
201	SPNS2_-_-_0	4	3089	0.0013	0	8186	0	case	0.0056
202	ZNFX1_100116_100116_0	4	3089	0.0013	0	8186	0	case	0.0056
203	PURG_197840_197840_1	4	3089	0.0013	0	8186	0	case	0.0056
204	ZNF214_-_-_3	4	3089	0.0013	0	8186	0	case	0.0056
205	RNF13_-_-_0	4	3089	0.0013	0	8186	0	case	0.0056
206	PTK7_-_-_0	4	3089	0.0013	0	8186	0	case	0.0056
207	MFSD8_-_-_2	4	3089	0.0013	0	8186	0	case	0.0056
208	GCK_252129_252129_0	4	3089	0.0013	0	8186	0	case	0.0056
209	CXorf21_259269_259269_0	4	3089	0.0013	0	8186	0	case	0.0056
210	ZNF397_257789_257789_4	4	3089	0.0013	0	8186	0	case	0.0056
211	C11orf73_253274_253274_0	4	3089	0.0013	0	8186	0	case	0.0056
212	SUMO1_176359_176359_0	4	3089	0.0013	0	8186	0	case	0.0056
213	CTAGE8_-_-_0	4	3089	0.0013	0	8186	0	case	0.0056
214	NHLH1_238036_238036_0	4	3089	0.0013	0	8186	0	case	0.0056
215	LRTM2_214507_214507_0	4	3089	0.0013	0	8186	0	case	0.0056
216	EMILIN2_249820_249820_0	5	3088	0.0016	43	8143	0.0053	ctrl	0.0057
217	CNGA1_-_-_2	5	3088	0.0016	44	8142	0.0054	ctrl	0.0057
218	CLIP3_-_-_1	0	3093	0	17	8169	0.0021	ctrl	0.0057
219	C4BPA_153056_153056_2	0	3093	0	17	8169	0.0021	ctrl	0.0057
220	MAD2L2_251210_251210_0	0	3093	0	17	8169	0.0021	ctrl	0.0057
221	DIS3L_-_-_2	0	3093	0	17	8169	0.0021	ctrl	0.0057
222	ISM2_-_-_1	0	3093	0	17	8169	0.0021	ctrl	0.0057
223	OR1N2_258124_258124_0	0	3093	0	17	8169	0.0021	ctrl	0.0057
224	RHBDD2_250801_250801_0	15	3078	0.0048	14	8172	0.0017	case	0.0058
225	CTNND2_-_-_0	15	3078	0.0048	14	8172	0.0017	case	0.0058
226	MAP3K4_-_-_0	29	3064	0.0094	133	8053	0.0162	ctrl	0.0058
227	LILRA3_143228_143228_0	1	3092	0.000323	24	8162	0.0029	ctrl	0.0058
228	MYSM1_-_-_2	1	3092	0.000323	24	8162	0.0029	ctrl	0.0058
229	VEZF1_-_-_1	1	3092	0.000323	24	8162	0.0029	ctrl	0.0058
230	PSMA4_-_-_1	1	3092	0.000323	24	8162	0.0029	ctrl	0.0058
231	FBXL22_-_-_1	4	3089	0.0013	40	8146	0.0049	ctrl	0.0059
232	FSD1_238020_238020_0	0	3093	0	18	8168	0.0022	ctrl	0.0059
233	NEDD9_-_-_1	0	3093	0	18	8168	0.0022	ctrl	0.0059
234	KIAA1755_258013_258013_0	0	3093	0	18	8168	0.0022	ctrl	0.0059
235	SPINT2_-_-_2	0	3093	0	18	8168	0.0022	ctrl	0.0059
236	CCDC169_259504_259504_0	0	3093	0	18	8168	0.0022	ctrl	0.0059
237	INTS3_-_-_1	0	3093	0	18	8168	0.0022	ctrl	0.0059
238	DDX21_-_-_0	17	3076	0.0055	17	8169	0.0021	case	0.0059
239	TMPRSS2_-_-_3	17	3076	0.0055	17	8169	0.0021	case	0.0059
240	BBS10_249602_249602_0	23	3070	0.0074	27	8159	0.0033	case	0.0061
241	HEPACAM_258162_258162_0	7	3086	0.0023	3	8183	0.000367	case	0.0062
242	PIK3CA_176043_176043_0	7	3086	0.0023	3	8183	0.000367	case	0.0062
243	B3GALTL_-_-_1	7	3086	0.0023	3	8183	0.000367	case	0.0062
244	LAMA3_249544_249544_1	7	3086	0.0023	3	8183	0.000367	case	0.0062
245	SUSD1_153056_153056_0	7	3086	0.0023	3	8183	0.000367	case	0.0062
246	STX2_253361_253361_0	7	3086	0.0023	3	8183	0.000367	case	0.0062
247	KCNK5_254488_254488_1	7	3086	0.0023	3	8183	0.000367	case	0.0062
248	WBP2NL_241368_241368_0	7	3086	0.0023	3	8183	0.000367	case	0.0062
249	IQCA1_249500_249500_0	7	3086	0.0023	3	8183	0.000367	case	0.0062
250	ELF5_188881_188881_0	7	3086	0.0023	3	8183	0.000367	case	0.0062
251	LCT_-_-_2	7	3086	0.0023	3	8183	0.000367	case	0.0062
252	SPOP_250031_250031_0	7	3086	0.0023	3	8183	0.000367	case	0.0062
253	ZNF259_-_-_0	7	3086	0.0023	3	8183	0.000367	case	0.0062
254	PBXIP1_-_-_0	25	3068	0.0081	118	8068	0.0144	ctrl	0.0062
255	ADCY7_-_-_0	29	3064	0.0094	39	8147	0.0048	case	0.0063
256	SEMA3E_200514_200514_0	27	3066	0.0087	35	8151	0.0043	case	0.0063
257	CPZ_200604_200604_0	9	3084	0.0029	60	8126	0.0073	ctrl	0.0063
258	CEP112_-_-_1	12	3081	0.0039	71	8115	0.0087	ctrl	0.0064
259	SYCP2L_-_-_0	21	3072	0.0068	105	8081	0.0128	ctrl	0.0064
260	PPP1R15A_-_-_1	14	3079	0.0045	12	8174	0.0015	case	0.0065
261	NFKBIE_-_-_1	14	3079	0.0045	12	8174	0.0015	case	0.0065
262	STEAP3_252177_252177_0	14	3079	0.0045	12	8174	0.0015	case	0.0065
263	SETD1A_-_-_1	62	3031	0.02	106	8080	0.0129	case	0.0068
264	SCLT1_-_-_0	14	3079	0.0045	78	8108	0.0095	ctrl	0.0068
265	FBXO40_-_-_0	36	3057	0.0116	156	8030	0.0191	ctrl	0.0069
266	ZNF69_-_-_1	6	3087	0.0019	2	8184	0.000244	case	0.007
267	AGBL4_-_-_0	6	3087	0.0019	2	8184	0.000244	case	0.007
268	GPSM2_251145_251145_2	6	3087	0.0019	2	8184	0.000244	case	0.007
269	RYR1_197746_197746_1	6	3087	0.0019	2	8184	0.000244	case	0.007
270	GPHN_238452_238452_0	6	3087	0.0019	2	8184	0.000244	case	0.007
271	ETV7_-_-_2	6	3087	0.0019	2	8184	0.000244	case	0.007
272	RAPGEF2_176380_176380_0	6	3087	0.0019	2	8184	0.000244	case	0.007
273	KCNG2_-_-_1	6	3087	0.0019	2	8184	0.000244	case	0.007
274	PDXDC1_99743_99743_0	6	3087	0.0019	2	8184	0.000244	case	0.007
275	SRA1_-_-_0	6	3087	0.0019	2	8184	0.000244	case	0.007
276	RAB9B_206697_206697_0	6	3087	0.0019	2	8184	0.000244	case	0.007
277	WNT2_-_-_1	6	3087	0.0019	2	8184	0.000244	case	0.007
278	HIST1H2BI_197718_197718_0	6	3087	0.0019	2	8184	0.000244	case	0.007
279	NUAK2_-_-_0	8	3085	0.0026	56	8130	0.0068	ctrl	0.007
280	DVL2_-_-_0	19	3074	0.0061	21	8165	0.0026	case	0.007
281	POLG2_238397_238397_0	11	3082	0.0036	67	8119	0.0082	ctrl	0.0071
282	PDE8B_249561_249561_0	5	3088	0.0016	1	8185	0.000122	case	0.0072
283	LARGE_-_-_0	5	3088	0.0016	1	8185	0.000122	case	0.0072
284	LGI3_112546_112546_2	5	3088	0.0016	1	8185	0.000122	case	0.0072
285	NEUROG1_-_-_1	5	3088	0.0016	1	8185	0.000122	case	0.0072
286	IFIT1_238112_238112_1	5	3088	0.0016	1	8185	0.000122	case	0.0072
287	RILPL2_256469_256469_0	5	3088	0.0016	1	8185	0.000122	case	0.0072
288	ZNF439_257789_257789_4	5	3088	0.0016	1	8185	0.000122	case	0.0072
289	ECI2_-_-_1	5	3088	0.0016	1	8185	0.000122	case	0.0072
290	TET1_257349_257349_0	5	3088	0.0016	1	8185	0.000122	case	0.0072
291	ZNF484_257789_257789_3	5	3088	0.0016	1	8185	0.000122	case	0.0072
292	SVEP1_153056_153056_27	5	3088	0.0016	1	8185	0.000122	case	0.0072
293	C12orf65_-_-_0	5	3088	0.0016	1	8185	0.000122	case	0.0072
294	URM1_-_-_1	5	3088	0.0016	1	8185	0.000122	case	0.0072
295	ZNF70_257789_257789_2	5	3088	0.0016	1	8185	0.000122	case	0.0072
296	ASB11_258127_258127_0	5	3088	0.0016	1	8185	0.000122	case	0.0072
297	ATP2B4_-_-_6	5	3088	0.0016	1	8185	0.000122	case	0.0072
298	MCF2_-_-_0	5	3088	0.0016	1	8185	0.000122	case	0.0072
299	STX4_-_-_0	5	3088	0.0016	1	8185	0.000122	case	0.0072
300	C9orf89_260079_260079_0	5	3088	0.0016	1	8185	0.000122	case	0.0072
301	KATNA1_-_-_1	5	3088	0.0016	1	8185	0.000122	case	0.0072
302	SIM2_-_-_2	5	3088	0.0016	1	8185	0.000122	case	0.0072
303	NR2F2_132746_132746_0	5	3088	0.0016	1	8185	0.000122	case	0.0072
304	SDHA_-_-_1	5	3088	0.0016	1	8185	0.000122	case	0.0072
305	HLA-F_-_-_2	5	3088	0.0016	1	8185	0.000122	case	0.0072
306	TMEM184A_-_-_1	5	3088	0.0016	1	8185	0.000122	case	0.0072
307	RAE1_-_-_1	5	3088	0.0016	1	8185	0.000122	case	0.0072
308	MUC5B_-_-_18	5	3088	0.0016	1	8185	0.000122	case	0.0072
309	OR2D2_-_-_0	11	3082	0.0036	8	8178	0.000977	case	0.0073
310	SHROOM1_-_-_0	11	3082	0.0036	8	8178	0.000977	case	0.0073
311	CHODL_153065_153065_0	11	3082	0.0036	8	8178	0.000977	case	0.0073
312	PCDHA5_206637_206637_3	11	3082	0.0036	8	8178	0.000977	case	0.0073
313	DYSF_175984_175984_0	2	3091	0.000647	28	8158	0.0034	ctrl	0.0073
314	MLPH_-_-_2	2	3091	0.000647	28	8158	0.0034	ctrl	0.0073
315	NGDN_252306_252306_0	2	3091	0.000647	28	8158	0.0034	ctrl	0.0073
316	LEPR_253680_253680_0	12	3081	0.0039	10	8176	0.0012	case	0.0073
317	LGSN_-_-_0	12	3081	0.0039	10	8176	0.0012	case	0.0073
318	AMHR2_173623_173623_0	12	3081	0.0039	10	8176	0.0012	case	0.0073
319	RAD51_238543_238543_0	12	3081	0.0039	10	8176	0.0012	case	0.0073
320	UBE2T_238117_238117_0	12	3081	0.0039	10	8176	0.0012	case	0.0073
321	MYBPHL_-_-_3	12	3081	0.0039	10	8176	0.0012	case	0.0073
322	CNOT4_-_-_0	2	3091	0.000647	29	8157	0.0035	ctrl	0.0074
323	FAT1_206637_206637_33	2	3091	0.000647	29	8157	0.0035	ctrl	0.0074
324	BBC3_-_-_0	17	3076	0.0055	18	8168	0.0022	case	0.0074
325	OR51M1_258124_258124_0	17	3076	0.0055	18	8168	0.0022	case	0.0074
326	LPCAT4_-_-_0	17	3076	0.0055	18	8168	0.0022	case	0.0074
327	ANKRD31_-_-_1	17	3076	0.0055	18	8168	0.0022	case	0.0074
328	PCDHA11_206637_206637_2	17	3076	0.0055	18	8168	0.0022	case	0.0074
329	LAMA4_238058_238058_1	17	3076	0.0055	18	8168	0.0022	case	0.0074
330	IFNL3_259311_259311_0	17	3076	0.0055	18	8168	0.0022	case	0.0074
331	FOXP4_-_-_0	28	3065	0.0091	37	8149	0.0045	case	0.0074
332	FRAS1_-_-_21	27	3066	0.0087	124	8062	0.0151	ctrl	0.0076
333	DNAH2_193256_193256_0	21	3072	0.0068	25	8161	0.0031	case	0.0077
334	ZFHX4_-_-_4	10	3083	0.0032	62	8124	0.0076	ctrl	0.0079
335	SIGLEC5_-_-_0	10	3083	0.0032	62	8124	0.0076	ctrl	0.0079
336	MFSD9_119392_119392_0	6	3087	0.0019	47	8139	0.0057	ctrl	0.0079
337	CCDC147_-_-_0	57	3036	0.0184	96	8090	0.0117	case	0.0079
338	KMT2D_-_-_4	89	3004	0.0288	321	7865	0.0392	ctrl	0.008
339	FBXO16_-_-_0	3	3090	0.00097	33	8153	0.004	ctrl	0.008
340	VGLL4_259379_259379_0	3	3090	0.00097	33	8153	0.004	ctrl	0.008
341	MGAT5_259161_259161_0	14	3079	0.0045	13	8173	0.0016	case	0.008
342	USP30_239127_239127_1	14	3079	0.0045	13	8173	0.0016	case	0.008
343	TTC38_-_-_1	14	3079	0.0045	13	8173	0.0016	case	0.008
344	DENND2A_-_-_3	15	3078	0.0048	81	8105	0.0099	ctrl	0.008
345	CCDC93_255537_255537_0	9	3084	0.0029	6	8180	0.000733	case	0.0081
346	RCCD1_-_-_1	9	3084	0.0029	6	8180	0.000733	case	0.0081
347	GUCY2C_-_-_2	9	3084	0.0029	6	8180	0.000733	case	0.0081
348	FBXW10_238121_238121_0	9	3084	0.0029	6	8180	0.000733	case	0.0081
349	LAMA2_214597_214597_0	9	3084	0.0029	6	8180	0.000733	case	0.0081
350	AGMAT_212538_212538_0	15	3078	0.0048	82	8104	0.01	ctrl	0.0081
351	YIPF2_252862_252862_0	4	3089	0.0013	37	8149	0.0045	ctrl	0.0082
352	LRRC31_-_-_0	4	3089	0.0013	37	8149	0.0045	ctrl	0.0082
353	MEDAG_-_-_0	4	3089	0.0013	38	8148	0.0046	ctrl	0.0083
354	CCDC42B_-_-_0	16	3077	0.0052	16	8170	0.002	case	0.0084
355	ZSWIM8_-_-_0	36	3057	0.0116	153	8033	0.0187	ctrl	0.0084
356	PTTG2_252837_252837_0	26	3067	0.0084	34	8152	0.0042	case	0.0084
357	GORASP1_-_-_0	18	3075	0.0058	19	8167	0.0023	case	0.0084
358	PYROXD2_131777_131777_0	18	3075	0.0058	19	8167	0.0023	case	0.0084
359	MYO10_241451_241451_0	18	3075	0.0058	19	8167	0.0023	case	0.0084
360	CD19_-_-_1	18	3075	0.0058	19	8167	0.0023	case	0.0084
361	MIER2_-_-_2	18	3075	0.0058	19	8167	0.0023	case	0.0084
362	ANGPTL2_238040_238040_0	24	3069	0.0078	30	8156	0.0037	case	0.0085
363	DIS3L_-_-_1	9	3084	0.0029	58	8128	0.0071	ctrl	0.0087
364	ILDR1_-_-_0	62	3031	0.02	107	8079	0.0131	case	0.0089
365	GIGYF2_-_-_1	36	3057	0.0116	54	8132	0.0066	case	0.009
366	CHST4_-_-_0	20	3073	0.0065	23	8163	0.0028	case	0.0091
367	LRRC23_-_-_1	1	3092	0.000323	22	8164	0.0027	ctrl	0.0091
368	CHAF1A_259688_259688_0	1	3092	0.000323	22	8164	0.0027	ctrl	0.0091
369	APOPT1_255836_255836_0	1	3092	0.000323	22	8164	0.0027	ctrl	0.0091
370	AGAP2_-_-_3	1	3092	0.000323	22	8164	0.0027	ctrl	0.0091
371	GALNT11_238092_238092_0	1	3092	0.000323	22	8164	0.0027	ctrl	0.0091
372	PARP9_239235_239235_1	1	3092	0.000323	22	8164	0.0027	ctrl	0.0091
373	RNASE13_-_-_0	1	3092	0.000323	22	8164	0.0027	ctrl	0.0091
374	GFPT2_-_-_2	1	3092	0.000323	22	8164	0.0027	ctrl	0.0091
375	KIF19_-_-_1	22	3071	0.0071	106	8080	0.0129	ctrl	0.0092
376	MXRA5_143165_143165_0	0	3093	0	16	8170	0.002	ctrl	0.0094
377	TRMT13_-_-_0	0	3093	0	16	8170	0.002	ctrl	0.0094
378	OR6B3_-_-_0	0	3093	0	16	8170	0.002	ctrl	0.0094
379	ZNF100_-_-_0	0	3093	0	16	8170	0.002	ctrl	0.0094
380	ZNF496_-_-_1	0	3093	0	16	8170	0.002	ctrl	0.0094
381	TMC5_-_-_1	0	3093	0	16	8170	0.002	ctrl	0.0094
382	CCDC169-SOHLH2_259504_259504_0	0	3093	0	16	8170	0.002	ctrl	0.0094
383	MTMR10_-_-_0	0	3093	0	16	8170	0.002	ctrl	0.0094
384	ACMSD_-_-_0	0	3093	0	16	8170	0.002	ctrl	0.0094
385	AURKAIP1_-_-_1	0	3093	0	16	8170	0.002	ctrl	0.0094
386	IL4I1_-_-_0	22	3071	0.0071	27	8159	0.0033	case	0.0094
387	TNFRSF8_-_-_2	22	3071	0.0071	27	8159	0.0033	case	0.0094
388	PES1_115393_115393_0	8	3085	0.0026	53	8133	0.0065	ctrl	0.0095
389	LDHD_251615_251615_0	8	3085	0.0026	54	8132	0.0066	ctrl	0.0095
390	CDC42EP1_-_-_1	8	3085	0.0026	54	8132	0.0066	ctrl	0.0095
391	FLCN_-_-_0	8	3085	0.0026	54	8132	0.0066	ctrl	0.0095
392	DNAH2_-_-_5	1	3092	0.000323	23	8163	0.0028	ctrl	0.0096
393	TCTE3_172358_172358_0	1	3092	0.000323	23	8163	0.0028	ctrl	0.0096
394	HSPG2_143231_143231_12	1	3092	0.000323	23	8163	0.0028	ctrl	0.0096
395	RYR2_251046_251046_0	1	3092	0.000323	23	8163	0.0028	ctrl	0.0096
396	FMNL3_253693_253693_0	1	3092	0.000323	23	8163	0.0028	ctrl	0.0096
397	TIGD7_-_-_0	1	3092	0.000323	23	8163	0.0028	ctrl	0.0096
398	PPM1B_238083_238083_0	18	3075	0.0058	20	8166	0.0024	case	0.0096
399	DPAGT1_133465_133465_0	18	3075	0.0058	20	8166	0.0024	case	0.0096
400	CORO7-PAM16_255124_255124_1	18	3075	0.0058	20	8166	0.0024	case	0.0096
401	CORO7_255124_255124_1	18	3075	0.0058	20	8166	0.0024	case	0.0096
402	PLEKHH1_-_-_1	27	3066	0.0087	36	8150	0.0044	case	0.01
403	OR5P3_-_-_1	11	3082	0.0036	9	8177	0.0011	case	0.01
404	COMMD7_240103_240103_0	11	3082	0.0036	9	8177	0.0011	case	0.01
405	TIAM2_-_-_3	11	3082	0.0036	9	8177	0.0011	case	0.01
406	LAMB1_-_-_1	11	3082	0.0036	9	8177	0.0011	case	0.01
407	UBAC1_-_-_3	11	3082	0.0036	9	8177	0.0011	case	0.01
408	PKNOX1_-_-_1	11	3082	0.0036	9	8177	0.0011	case	0.01
409	RNF152_-_-_0	11	3082	0.0036	9	8177	0.0011	case	0.01
410	HAUS6_-_-_0	30	3063	0.0097	133	8053	0.0162	ctrl	0.01
411	KIAA1919_119392_119392_0	16	3077	0.0052	17	8169	0.0021	case	0.0101
412	FAM71A_257078_257078_0	16	3077	0.0052	17	8169	0.0021	case	0.0101
413	SZT2_-_-_0	92	3001	0.0297	328	7858	0.0401	ctrl	0.0102
414	TOX2_-_-_0	7	3086	0.0023	49	8137	0.006	ctrl	0.0103
415	UGT1A10_-_-_0	7	3086	0.0023	49	8137	0.006	ctrl	0.0103
416	ROBO1_143317_143317_1	8	3085	0.0026	5	8181	0.000611	case	0.0103
417	SLC25A43_249634_249634_1	8	3085	0.0026	5	8181	0.000611	case	0.0103
418	ZNF25_257789_257789_3	8	3085	0.0026	5	8181	0.000611	case	0.0103
419	ADRA1B_-_-_1	8	3085	0.0026	5	8181	0.000611	case	0.0103
420	NUDT12_238125_238125_0	8	3085	0.0026	5	8181	0.000611	case	0.0103
421	IREB2_-_-_0	8	3085	0.0026	5	8181	0.000611	case	0.0103
422	ZNF721_257789_257789_3	8	3085	0.0026	5	8181	0.000611	case	0.0103
423	WHSC1L1_-_-_4	8	3085	0.0026	5	8181	0.000611	case	0.0103
424	PRDM15_177301_177301_0	8	3085	0.0026	5	8181	0.000611	case	0.0103
425	MTF1_-_-_3	8	3085	0.0026	5	8181	0.000611	case	0.0103
426	ATPIF1_252676_252676_0	8	3085	0.0026	5	8181	0.000611	case	0.0103
427	CELA3B_-_-_0	8	3085	0.0026	5	8181	0.000611	case	0.0103
428	PLD6_-_-_0	8	3085	0.0026	5	8181	0.000611	case	0.0103
429	TERF1_-_-_2	8	3085	0.0026	5	8181	0.000611	case	0.0103
430	KRT72_-_-_0	21	3072	0.0068	101	8085	0.0123	ctrl	0.0105
431	FHOD3_251141_251141_0	7	3086	0.0023	50	8136	0.0061	ctrl	0.0105
432	AGTPBP1_-_-_1	15	3078	0.0048	79	8107	0.0097	ctrl	0.0106
433	ADAT1_251113_251113_1	14	3079	0.0045	14	8172	0.0017	case	0.0106
434	PHKA2_250084_250084_1	14	3079	0.0045	14	8172	0.0017	case	0.0106
435	IL5_251045_251045_0	14	3079	0.0045	14	8172	0.0017	case	0.0106
436	GTPBP4_206684_206684_0	14	3079	0.0045	14	8172	0.0017	case	0.0106
437	SNTB1_-_-_0	10	3083	0.0032	7	8179	0.000855	case	0.0107
438	FSTL4_143165_143165_0	10	3083	0.0032	7	8179	0.000855	case	0.0107
439	DDX20_238034_238034_0	10	3083	0.0032	7	8179	0.000855	case	0.0107
440	RBM3_-_-_1	10	3083	0.0032	7	8179	0.000855	case	0.0107
441	SEMA6D_-_-_1	10	3083	0.0032	7	8179	0.000855	case	0.0107
442	OR52W1_-_-_1	10	3083	0.0032	7	8179	0.000855	case	0.0107
443	SERGEF_249843_249843_3	10	3083	0.0032	7	8179	0.000855	case	0.0107
444	RPGRIP1_-_-_0	10	3083	0.0032	61	8125	0.0075	ctrl	0.0107
445	ITGB2_-_-_2	22	3071	0.0071	28	8158	0.0034	case	0.0109
446	CATSPERG_-_-_2	27	3066	0.0087	37	8149	0.0045	case	0.0109
447	TLDC1_-_-_0	6	3087	0.0019	45	8141	0.0055	ctrl	0.0111
448	PLXNB1_149409_149409_0	6	3087	0.0019	45	8141	0.0055	ctrl	0.0111
449	ICAM1_-_-_4	2	3091	0.000647	27	8159	0.0033	ctrl	0.0111
450	METTL22_-_-_1	2	3091	0.000647	27	8159	0.0033	ctrl	0.0111
451	DCPS_253304_253304_0	2	3091	0.000647	27	8159	0.0033	ctrl	0.0111
452	BUB1B_-_-_2	2	3091	0.000647	27	8159	0.0033	ctrl	0.0111
453	OGFOD2_-_-_1	2	3091	0.000647	27	8159	0.0033	ctrl	0.0111
454	CRX_-_-_1	2	3091	0.000647	27	8159	0.0033	ctrl	0.0111
455	NR4A2_-_-_2	2	3091	0.000647	27	8159	0.0033	ctrl	0.0111
456	UNC5B_189721_189721_0	2	3091	0.000647	27	8159	0.0033	ctrl	0.0111
457	IGFN1_143225_143225_0	2	3091	0.000647	27	8159	0.0033	ctrl	0.0111
458	TNK1_-_-_3	25	3068	0.0081	33	8153	0.004	case	0.0113
459	FRMPD1_-_-_2	29	3064	0.0094	127	8059	0.0155	ctrl	0.0114
460	PTPRN_-_-_1	18	3075	0.0058	21	8165	0.0026	case	0.0116
461	ZCCHC14_-_-_2	18	3075	0.0058	21	8165	0.0026	case	0.0116
462	IDE_-_-_1	18	3075	0.0058	21	8165	0.0026	case	0.0116
463	TRIM42_-_-_1	5	3088	0.0016	40	8146	0.0049	ctrl	0.0116
464	MTERFD1_-_-_1	23	3070	0.0074	29	8157	0.0035	case	0.0116
465	TRPM6_-_-_1	32	3061	0.0103	138	8048	0.0169	ctrl	0.0117
466	ZNF695_-_-_8	3	3090	0.00097	31	8155	0.0038	ctrl	0.0118
467	RASAL1_213337_213337_0	3	3090	0.00097	31	8155	0.0038	ctrl	0.0118
468	GPSM1_-_-_2	3	3090	0.00097	31	8155	0.0038	ctrl	0.0118
469	ACAD10_240175_240175_0	9	3084	0.0029	56	8130	0.0068	ctrl	0.0119
470	GOLGA5_-_-_0	9	3084	0.0029	56	8130	0.0068	ctrl	0.0119
471	ATAD2_-_-_2	30	3063	0.0097	43	8143	0.0053	case	0.0119
472	KLHL40_254375_254375_0	15	3078	0.0048	15	8171	0.0018	case	0.012
473	ZCCHC9_-_-_0	15	3078	0.0048	15	8171	0.0018	case	0.012
474	ABCB4_-_-_2	3	3090	0.00097	32	8154	0.0039	ctrl	0.0121
475	ARHGEF28_-_-_0	18	3075	0.0058	89	8097	0.0109	ctrl	0.0121
476	SYNE2_-_-_4	16	3077	0.0052	82	8104	0.01	ctrl	0.0121
477	TPR_-_-_0	48	3045	0.0155	189	7997	0.0231	ctrl	0.0122
478	SLC15A2_233190_233190_0	33	3060	0.0107	49	8137	0.006	case	0.0125
479	B4GALNT1_-_-_1	19	3074	0.0061	22	8164	0.0027	case	0.0127
480	CSGALNACT2_253317_253317_0	23	3070	0.0074	30	8156	0.0037	case	0.0128
481	NELL2_-_-_6	7	3086	0.0023	4	8182	0.000489	case	0.0129
482	CNTNAP1_238058_238058_0	7	3086	0.0023	4	8182	0.000489	case	0.0129
483	DDX42_238034_238034_0	7	3086	0.0023	4	8182	0.000489	case	0.0129
484	PEPD_-_-_0	7	3086	0.0023	4	8182	0.000489	case	0.0129
485	MDM4_-_-_0	7	3086	0.0023	4	8182	0.000489	case	0.0129
486	CCNJL_238003_238003_0	7	3086	0.0023	4	8182	0.000489	case	0.0129
487	HIST1H2BJ_197718_197718_0	7	3086	0.0023	4	8182	0.000489	case	0.0129
488	KCNC2_-_-_0	7	3086	0.0023	4	8182	0.000489	case	0.0129
489	SCUBE2_-_-_2	7	3086	0.0023	4	8182	0.000489	case	0.0129
490	PAGE2_203332_203332_0	7	3086	0.0023	4	8182	0.000489	case	0.0129
491	FRG1_-_-_0	7	3086	0.0023	4	8182	0.000489	case	0.0129
492	NSFL1C_-_-_1	7	3086	0.0023	4	8182	0.000489	case	0.0129
493	CENPT_-_-_0	7	3086	0.0023	4	8182	0.000489	case	0.0129
494	ANKRD13A_-_-_2	7	3086	0.0023	4	8182	0.000489	case	0.0129
495	ZNF667_-_-_4	7	3086	0.0023	4	8182	0.000489	case	0.0129
496	SDK2_238020_238020_12	7	3086	0.0023	4	8182	0.000489	case	0.0129
497	AGAP1_241281_241281_1	7	3086	0.0023	4	8182	0.000489	case	0.0129
498	EML3_190637_190637_0	7	3086	0.0023	4	8182	0.000489	case	0.0129
499	RASAL2_-_-_2	11	3082	0.0036	63	8123	0.0077	ctrl	0.0129
500	CYP2R1_249556_249556_0	8	3085	0.0026	52	8134	0.0064	ctrl	0.0131
501	NSMF_-_-_0	8	3085	0.0026	52	8134	0.0064	ctrl	0.0131
502	MTG1_206749_206749_0	8	3085	0.0026	52	8134	0.0064	ctrl	0.0131
503	CYP1A1_249556_249556_0	21	3072	0.0068	99	8087	0.0121	ctrl	0.0134
504	PLD1_-_-_1	26	3067	0.0084	35	8151	0.0043	case	0.0135
505	MCC_-_-_3	21	3072	0.0068	100	8086	0.0122	ctrl	0.0135
506	SSH1_-_-_0	19	3074	0.0061	92	8094	0.0112	ctrl	0.0137
507	SPEF2_-_-_2	26	3067	0.0084	117	8069	0.0143	ctrl	0.0138
508	GPR128_249498_249498_0	28	3065	0.0091	40	8146	0.0049	case	0.0138
509	STAP1_241422_241422_0	10	3083	0.0032	8	8178	0.000977	case	0.014
510	DNAH11_-_-_5	10	3083	0.0032	8	8178	0.000977	case	0.014
511	RFC3_254867_254867_0	10	3083	0.0032	8	8178	0.000977	case	0.014
512	ABCC12_-_-_1	10	3083	0.0032	8	8178	0.000977	case	0.014
513	ATP7B_238219_238219_0	10	3083	0.0032	8	8178	0.000977	case	0.014
514	PCDHA3_-_-_6	10	3083	0.0032	8	8178	0.000977	case	0.014
515	PCDHA9_203892_203892_0	10	3083	0.0032	8	8178	0.000977	case	0.014
516	UCK1_238981_238981_0	10	3083	0.0032	8	8178	0.000977	case	0.014
517	GFM2_239683_239683_0	10	3083	0.0032	8	8178	0.000977	case	0.014
518	CCL7_197570_197570_0	10	3083	0.0032	8	8178	0.000977	case	0.014
519	CLN8_214789_214789_0	10	3083	0.0032	8	8178	0.000977	case	0.014
520	CFHR4_-_-_4	10	3083	0.0032	8	8178	0.000977	case	0.014
521	ROBO1_143317_143317_2	15	3078	0.0048	16	8170	0.002	case	0.014
522	FGFR1_-_-_1	15	3078	0.0048	16	8170	0.002	case	0.014
523	INO80_-_-_3	15	3078	0.0048	16	8170	0.002	case	0.014
524	SLITRK3_-_-_0	7	3086	0.0023	47	8139	0.0057	ctrl	0.0144
525	MRGPRX1_-_-_0	7	3086	0.0023	47	8139	0.0057	ctrl	0.0144
526	GON4L_-_-_1	13	3080	0.0042	13	8173	0.0016	case	0.0144
527	RCCD1_249843_249843_0	13	3080	0.0042	13	8173	0.0016	case	0.0144
528	C3orf30_-_-_0	13	3080	0.0042	13	8173	0.0016	case	0.0144
529	WDR59_238121_238121_0	13	3080	0.0042	13	8173	0.0016	case	0.0144
530	ARSG_258845_258845_0	13	3080	0.0042	13	8173	0.0016	case	0.0144
531	MMP10_238046_238046_0	13	3080	0.0042	13	8173	0.0016	case	0.0144
532	NELFCD_252838_252838_0	7	3086	0.0023	48	8138	0.0059	ctrl	0.0144
533	LRRC52_-_-_2	7	3086	0.0023	48	8138	0.0059	ctrl	0.0144
534	KIAA1598_-_-_0	7	3086	0.0023	48	8138	0.0059	ctrl	0.0144
535	GALR3_-_-_0	11	3082	0.0036	10	8176	0.0012	case	0.0145
536	CPXM1_-_-_0	11	3082	0.0036	10	8176	0.0012	case	0.0145
537	USP12_239128_239128_0	11	3082	0.0036	10	8176	0.0012	case	0.0145
538	ANKRD13D_-_-_2	11	3082	0.0036	10	8176	0.0012	case	0.0145
539	RHOT2_254755_254755_0	11	3082	0.0036	10	8176	0.0012	case	0.0145
540	UBE2U_238117_238117_0	11	3082	0.0036	10	8176	0.0012	case	0.0145
541	UPK1A_239409_239409_0	11	3082	0.0036	10	8176	0.0012	case	0.0145
542	LRRC32_-_-_1	11	3082	0.0036	10	8176	0.0012	case	0.0145
543	CAD_-_-_1	11	3082	0.0036	10	8176	0.0012	case	0.0145
544	MED12_256873_256873_0	11	3082	0.0036	10	8176	0.0012	case	0.0145
545	PPAPDC2_239485_239485_0	1	3092	0.000323	21	8165	0.0026	ctrl	0.0145
546	OR7A5_-_-_1	1	3092	0.000323	21	8165	0.0026	ctrl	0.0145
547	UNC13D_176058_176058_0	1	3092	0.000323	21	8165	0.0026	ctrl	0.0145
548	CLEC1A_153063_153063_0	1	3092	0.000323	21	8165	0.0026	ctrl	0.0145
549	CORO1B_255124_255124_0	1	3092	0.000323	21	8165	0.0026	ctrl	0.0145
550	RPH3A_251218_251218_0	1	3092	0.000323	21	8165	0.0026	ctrl	0.0145
551	SUZ12_-_-_0	1	3092	0.000323	21	8165	0.0026	ctrl	0.0145
552	ZNF266_257789_257789_1	1	3092	0.000323	21	8165	0.0026	ctrl	0.0145
553	MRPS15_-_-_1	1	3092	0.000323	21	8165	0.0026	ctrl	0.0145
554	KIF1B_-_-_2	1	3092	0.000323	21	8165	0.0026	ctrl	0.0145
555	BMPER_255012_255012_0	1	3092	0.000323	21	8165	0.0026	ctrl	0.0145
556	RNF145_-_-_0	1	3092	0.000323	21	8165	0.0026	ctrl	0.0145
557	OR8K3_258124_258124_0	21	3072	0.0068	27	8159	0.0033	case	0.0146
558	CCDC39_-_-_0	48	3045	0.0155	187	7999	0.0228	ctrl	0.0146
559	ST5_-_-_3	22	3071	0.0071	102	8084	0.0125	ctrl	0.0148
560	SMG1_-_-_1	27	3066	0.0087	119	8067	0.0145	ctrl	0.0149
561	SCYL3_-_-_0	24	3069	0.0078	32	8154	0.0039	case	0.0152
562	MGME1_-_-_0	24	3069	0.0078	32	8154	0.0039	case	0.0152
563	FYTTD1_115714_115714_0	24	3069	0.0078	32	8154	0.0039	case	0.0152
564	PINK1_-_-_0	6	3087	0.0019	43	8143	0.0053	ctrl	0.0155
565	TLR9_-_-_2	6	3087	0.0019	43	8143	0.0053	ctrl	0.0155
566	OR2A14_-_-_0	6	3087	0.0019	43	8143	0.0053	ctrl	0.0155
567	OR5D18_-_-_0	0	3093	0	14	8172	0.0017	ctrl	0.0155
568	C8B_-_-_1	0	3093	0	14	8172	0.0017	ctrl	0.0155
569	PTS_238264_238264_0	0	3093	0	14	8172	0.0017	ctrl	0.0155
570	FAM208A_257096_257096_0	0	3093	0	14	8172	0.0017	ctrl	0.0155
571	LAMB3_249544_249544_1	0	3093	0	14	8172	0.0017	ctrl	0.0155
572	OR4K13_-_-_1	0	3093	0	14	8172	0.0017	ctrl	0.0155
573	EEPD1_-_-_0	0	3093	0	14	8172	0.0017	ctrl	0.0155
574	CLNS1A_252007_252007_0	0	3093	0	14	8172	0.0017	ctrl	0.0155
575	SPTBN2_241307_241307_0	0	3093	0	14	8172	0.0017	ctrl	0.0155
576	STAU1_-_-_2	0	3093	0	14	8172	0.0017	ctrl	0.0155
577	SPTBN5_238103_238103_10	0	3093	0	14	8172	0.0017	ctrl	0.0155
578	SLC22A15_-_-_1	0	3093	0	14	8172	0.0017	ctrl	0.0155
579	C6orf163_-_-_0	0	3093	0	14	8172	0.0017	ctrl	0.0155
580	ZNF320_-_-_6	0	3093	0	14	8172	0.0017	ctrl	0.0155
581	FOXK1_189470_189470_0	0	3093	0	14	8172	0.0017	ctrl	0.0155
582	ALS2_249843_249843_1	0	3093	0	14	8172	0.0017	ctrl	0.0155
583	SNRPC_-_-_0	0	3093	0	14	8172	0.0017	ctrl	0.0155
584	CD82_-_-_1	0	3093	0	14	8172	0.0017	ctrl	0.0155
585	ANKRD2_238125_238125_0	0	3093	0	14	8172	0.0017	ctrl	0.0155
586	C11orf21_-_-_1	0	3093	0	14	8172	0.0017	ctrl	0.0155
587	SCN11A_-_-_2	18	3075	0.0058	88	8098	0.0108	ctrl	0.0157
588	SYNE2_-_-_7	17	3076	0.0055	20	8166	0.0024	case	0.0157
589	CDK13_-_-_0	16	3077	0.0052	80	8106	0.0098	ctrl	0.0158
590	NAALADL1_193568_193568_0	14	3079	0.0045	74	8112	0.009	ctrl	0.0158
591	KATNB1_-_-_1	6	3087	0.0019	44	8142	0.0054	ctrl	0.0159
592	PLA2R1_214480_214480_4	6	3087	0.0019	3	8183	0.000367	case	0.016
593	KCNN4_252012_252012_0	6	3087	0.0019	3	8183	0.000367	case	0.016
594	SNX8_132776_132776_0	6	3087	0.0019	3	8183	0.000367	case	0.016
595	C10orf2_-_-_1	6	3087	0.0019	3	8183	0.000367	case	0.016
596	FERMT2_241359_241359_0	6	3087	0.0019	3	8183	0.000367	case	0.016
597	HBZ_238510_238510_0	6	3087	0.0019	3	8183	0.000367	case	0.016
598	MSX2_-_-_1	6	3087	0.0019	3	8183	0.000367	case	0.016
599	UGT2B4_-_-_0	6	3087	0.0019	3	8183	0.000367	case	0.016
600	DNAH2_-_-_3	6	3087	0.0019	3	8183	0.000367	case	0.016
601	MUC5B_257660_257660_0	6	3087	0.0019	3	8183	0.000367	case	0.016
602	SEC31B_-_-_2	6	3087	0.0019	3	8183	0.000367	case	0.016
603	WDR46_-_-_0	6	3087	0.0019	3	8183	0.000367	case	0.016
604	ARL14_-_-_0	6	3087	0.0019	3	8183	0.000367	case	0.016
605	MAN2A1_-_-_1	6	3087	0.0019	3	8183	0.000367	case	0.016
606	EDC4_238121_238121_0	6	3087	0.0019	3	8183	0.000367	case	0.016
607	SV2A_119392_119392_0	6	3087	0.0019	3	8183	0.000367	case	0.016
608	DNAH6_-_-_2	6	3087	0.0019	3	8183	0.000367	case	0.016
609	EZR_241348_241348_0	6	3087	0.0019	3	8183	0.000367	case	0.016
610	FAM24B_259327_259327_0	6	3087	0.0019	3	8183	0.000367	case	0.016
611	BRE_-_-_0	6	3087	0.0019	3	8183	0.000367	case	0.016
612	RAPGEF1_214571_214571_0	6	3087	0.0019	3	8183	0.000367	case	0.016
613	NID1_-_-_11	6	3087	0.0019	3	8183	0.000367	case	0.016
614	AADACL3_-_-_0	6	3087	0.0019	3	8183	0.000367	case	0.016
615	IFI27L2_253581_253581_0	6	3087	0.0019	3	8183	0.000367	case	0.016
616	EMR3_-_-_0	6	3087	0.0019	3	8183	0.000367	case	0.016
617	SPTB_249855_249855_0	6	3087	0.0019	3	8183	0.000367	case	0.016
618	ZNF236_-_-_11	6	3087	0.0019	3	8183	0.000367	case	0.016
619	APOBEC3D_147441_147441_0	6	3087	0.0019	3	8183	0.000367	case	0.016
620	ZNF695_257789_257789_2	6	3087	0.0019	3	8183	0.000367	case	0.016
621	DR1_-_-_1	6	3087	0.0019	3	8183	0.000367	case	0.016
622	ZNF600_-_-_1	26	3067	0.0084	37	8149	0.0045	case	0.0161
623	NFIC_-_-_2	32	3061	0.0103	48	8138	0.0059	case	0.0162
624	NOTCH1_238011_238011_0	0	3093	0	15	8171	0.0018	ctrl	0.0163
625	KCNA1_-_-_0	0	3093	0	15	8171	0.0018	ctrl	0.0163
626	VWA3B_258054_258054_0	0	3093	0	15	8171	0.0018	ctrl	0.0163
627	SYNE2_238103_238103_0	0	3093	0	15	8171	0.0018	ctrl	0.0163
628	FRMPD2_255329_255329_0	0	3093	0	15	8171	0.0018	ctrl	0.0163
629	TRAPPC11_254514_254514_0	0	3093	0	15	8171	0.0018	ctrl	0.0163
630	CCDC177_-_-_0	0	3093	0	15	8171	0.0018	ctrl	0.0163
631	APOBEC3B_-_-_0	0	3093	0	15	8171	0.0018	ctrl	0.0163
632	EFCAB2_-_-_0	0	3093	0	15	8171	0.0018	ctrl	0.0163
633	XKR3_-_-_1	0	3093	0	15	8171	0.0018	ctrl	0.0163
634	HIRIP3_-_-_0	0	3093	0	15	8171	0.0018	ctrl	0.0163
635	LMNB1_-_-_1	0	3093	0	15	8171	0.0018	ctrl	0.0163
636	ZNF333_-_-_6	0	3093	0	15	8171	0.0018	ctrl	0.0163
637	NANS_212160_212160_0	0	3093	0	15	8171	0.0018	ctrl	0.0163
638	PCDH15_-_-_5	0	3093	0	15	8171	0.0018	ctrl	0.0163
639	ANKFN1_238125_238125_0	0	3093	0	15	8171	0.0018	ctrl	0.0163
640	CRYGS_249523_249523_0	0	3093	0	15	8171	0.0018	ctrl	0.0163
641	GAK_-_-_1	28	3065	0.0091	122	8064	0.0149	ctrl	0.0163
642	ZMYM6_253746_253746_0	12	3081	0.0039	11	8175	0.0013	case	0.0163
643	KAT2A_-_-_2	12	3081	0.0039	11	8175	0.0013	case	0.0163
644	SAR1B_206645_206645_0	12	3081	0.0039	11	8175	0.0013	case	0.0163
645	GMNC_-_-_0	12	3081	0.0039	11	8175	0.0013	case	0.0163
646	CD63_239419_239419_0	12	3081	0.0039	11	8175	0.0013	case	0.0163
647	ZNF490_257789_257789_5	12	3081	0.0039	11	8175	0.0013	case	0.0163
648	MAML2_-_-_0	34	3059	0.011	141	8045	0.0172	ctrl	0.0166
649	GPS2_-_-_0	5	3088	0.0016	38	8148	0.0046	ctrl	0.0167
650	EPRS_238439_238439_0	5	3088	0.0016	38	8148	0.0046	ctrl	0.0167
651	BRSK1_-_-_1	5	3088	0.0016	38	8148	0.0046	ctrl	0.0167
652	TAS2R7_253139_253139_0	5	3088	0.0016	38	8148	0.0046	ctrl	0.0167
653	EFCAB13_-_-_1	5	3088	0.0016	39	8147	0.0048	ctrl	0.0167
654	MAGI1_-_-_0	5	3088	0.0016	39	8147	0.0048	ctrl	0.0167
655	SLC1A2_249810_249810_0	5	3088	0.0016	39	8147	0.0048	ctrl	0.0167
656	BCAR1_211406_211406_0	2	3091	0.000647	25	8161	0.0031	ctrl	0.0167
657	TANGO6_255939_255939_0	2	3091	0.000647	25	8161	0.0031	ctrl	0.0167
658	SLC38A8_-_-_0	2	3091	0.000647	25	8161	0.0031	ctrl	0.0167
659	COL27A1_214560_214560_0	2	3091	0.000647	25	8161	0.0031	ctrl	0.0167
660	DCHS2_206637_206637_18	2	3091	0.000647	25	8161	0.0031	ctrl	0.0167
661	APOO_255542_255542_0	2	3091	0.000647	25	8161	0.0031	ctrl	0.0167
662	RABGGTA_149008_149008_0	2	3091	0.000647	25	8161	0.0031	ctrl	0.0167
663	DNAJC17_240875_240875_0	2	3091	0.000647	25	8161	0.0031	ctrl	0.0167
664	OR2AK2_-_-_0	2	3091	0.000647	25	8161	0.0031	ctrl	0.0167
665	IP6K3_252154_252154_0	27	3066	0.0087	38	8148	0.0046	case	0.0168
666	KRTAP10-9_-_-_0	26	3067	0.0084	115	8071	0.014	ctrl	0.0172
667	VPS13C_253843_253843_0	4	3089	0.0013	34	8152	0.0042	ctrl	0.0173
668	LILRB4_143228_143228_1	4	3089	0.0013	34	8152	0.0042	ctrl	0.0173
669	A2M_-_-_4	4	3089	0.0013	34	8152	0.0042	ctrl	0.0173
670	UGT1A5_99960_99960_0	4	3089	0.0013	34	8152	0.0042	ctrl	0.0173
671	CLINT1_-_-_0	11	3082	0.0036	62	8124	0.0076	ctrl	0.0173
672	PADI2_251708_251708_0	11	3082	0.0036	62	8124	0.0076	ctrl	0.0173
673	NR4A1_132762_132762_0	11	3082	0.0036	62	8124	0.0076	ctrl	0.0173
674	RNASEK_-_-_0	2	3091	0.000647	26	8160	0.0032	ctrl	0.0174
675	TDRP_-_-_0	2	3091	0.000647	26	8160	0.0032	ctrl	0.0174
676	PCDH20_203892_203892_0	2	3091	0.000647	26	8160	0.0032	ctrl	0.0174
677	ZNF765_-_-_4	2	3091	0.000647	26	8160	0.0032	ctrl	0.0174
678	RNF112_-_-_2	2	3091	0.000647	26	8160	0.0032	ctrl	0.0174
679	ITGB8_-_-_1	15	3078	0.0048	17	8169	0.0021	case	0.0174
680	MRPL23_144021_144021_0	15	3078	0.0048	17	8169	0.0021	case	0.0174
681	TUBGCP4_252397_252397_0	32	3061	0.0103	49	8137	0.006	case	0.0174
682	PLEKHG4B_-_-_0	3	3090	0.00097	30	8156	0.0037	ctrl	0.0176
683	PAQR5_251670_251670_0	3	3090	0.00097	30	8156	0.0037	ctrl	0.0176
684	NAPEPLD_225130_225130_0	3	3090	0.00097	30	8156	0.0037	ctrl	0.0176
685	GLDN_251147_251147_0	3	3090	0.00097	30	8156	0.0037	ctrl	0.0176
686	MX2_-_-_1	20	3073	0.0065	25	8161	0.0031	case	0.0176
687	KIF27_-_-_0	29	3064	0.0094	125	8061	0.0153	ctrl	0.0177
688	FAP_-_-_1	30	3063	0.0097	44	8142	0.0054	case	0.0178
689	RBMXL3_-_-_1	35	3058	0.0113	144	8042	0.0176	ctrl	0.0178
690	VPS37C_254100_254100_0	4	3089	0.0013	35	8151	0.0043	ctrl	0.0178
691	WDR70_-_-_0	4	3089	0.0013	35	8151	0.0043	ctrl	0.0178
692	HYAL2_250758_250758_0	4	3089	0.0013	35	8151	0.0043	ctrl	0.0178
693	ABCA7_-_-_0	24	3069	0.0078	108	8078	0.0132	ctrl	0.0181
694	SIRT3_238699_238699_0	8	3085	0.0026	51	8135	0.0062	ctrl	0.0182
695	RIN2_-_-_1	8	3085	0.0026	51	8135	0.0062	ctrl	0.0182
696	SART3_-_-_2	15	3078	0.0048	77	8109	0.0094	ctrl	0.0183
697	TMEM255B_259104_259104_0	15	3078	0.0048	77	8109	0.0094	ctrl	0.0183
698	GAS8_-_-_0	15	3078	0.0048	77	8109	0.0094	ctrl	0.0183
699	GOLGB1_-_-_0	88	3005	0.0285	308	7878	0.0376	ctrl	0.0186
700	GIF_250377_250377_0	16	3077	0.0052	18	8168	0.0022	case	0.0188
701	OOEP_-_-_1	16	3077	0.0052	18	8168	0.0022	case	0.0188
702	FAM114A2_147490_147490_0	16	3077	0.0052	18	8168	0.0022	case	0.0188
703	TGM1_250190_250190_0	16	3077	0.0052	18	8168	0.0022	case	0.0188
704	SLFNL1_252528_252528_0	36	3057	0.0116	57	8129	0.007	case	0.019
705	GANC_133134_133134_0	25	3068	0.0081	35	8151	0.0043	case	0.0193
706	GCGR_249498_249498_0	22	3071	0.0071	30	8156	0.0037	case	0.0194
707	ZNF491_-_-_4	22	3071	0.0071	30	8156	0.0037	case	0.0194
708	TUBGCP5_252397_252397_0	22	3071	0.0071	30	8156	0.0037	case	0.0194
709	TRUB2_211345_211345_0	22	3071	0.0071	30	8156	0.0037	case	0.0194
710	TRIB3_-_-_1	5	3088	0.0016	2	8184	0.000244	case	0.0194
711	MUC5B_250897_250897_0	5	3088	0.0016	2	8184	0.000244	case	0.0194
712	METTL10_-_-_0	5	3088	0.0016	2	8184	0.000244	case	0.0194
713	MXD1_-_-_0	5	3088	0.0016	2	8184	0.000244	case	0.0194
714	SLC2A12_-_-_2	5	3088	0.0016	2	8184	0.000244	case	0.0194
715	CRNKL1_214642_214642_0	5	3088	0.0016	2	8184	0.000244	case	0.0194
716	MVK_249743_249743_0	5	3088	0.0016	2	8184	0.000244	case	0.0194
717	ZNF250_257789_257789_6	5	3088	0.0016	2	8184	0.000244	case	0.0194
718	GNG2_128520_128520_0	5	3088	0.0016	2	8184	0.000244	case	0.0194
719	RB1_250920_250920_0	5	3088	0.0016	2	8184	0.000244	case	0.0194
720	CPA5_-_-_1	5	3088	0.0016	2	8184	0.000244	case	0.0194
721	RBFA_-_-_2	5	3088	0.0016	2	8184	0.000244	case	0.0194
722	CRYGB_-_-_1	5	3088	0.0016	2	8184	0.000244	case	0.0194
723	UAP1_-_-_0	5	3088	0.0016	2	8184	0.000244	case	0.0194
724	SRC_198228_198228_0	5	3088	0.0016	2	8184	0.000244	case	0.0194
725	CACNA2D1_117050_117050_0	5	3088	0.0016	2	8184	0.000244	case	0.0194
726	DBH_-_-_2	5	3088	0.0016	2	8184	0.000244	case	0.0194
727	ABTB1_-_-_1	5	3088	0.0016	2	8184	0.000244	case	0.0194
728	SETD9_250181_250181_0	5	3088	0.0016	2	8184	0.000244	case	0.0194
729	ZPLD1_-_-_0	5	3088	0.0016	2	8184	0.000244	case	0.0194
730	PBRM1_-_-_5	5	3088	0.0016	2	8184	0.000244	case	0.0194
731	UNC5D_143317_143317_0	5	3088	0.0016	2	8184	0.000244	case	0.0194
732	CAP1_197827_197827_0	5	3088	0.0016	2	8184	0.000244	case	0.0194
733	ACACA_-_-_1	5	3088	0.0016	2	8184	0.000244	case	0.0194
734	FTSJ3_-_-_0	5	3088	0.0016	2	8184	0.000244	case	0.0194
735	NBEA_-_-_2	5	3088	0.0016	2	8184	0.000244	case	0.0194
736	TRIP13_249500_249500_0	5	3088	0.0016	2	8184	0.000244	case	0.0194
737	LRP10_-_-_4	5	3088	0.0016	2	8184	0.000244	case	0.0194
738	MST1_214527_214527_2	5	3088	0.0016	2	8184	0.000244	case	0.0194
739	EHMT2_238125_238125_0	5	3088	0.0016	2	8184	0.000244	case	0.0194
740	LRP1B_-_-_42	5	3088	0.0016	2	8184	0.000244	case	0.0194
741	LAG3_-_-_0	5	3088	0.0016	2	8184	0.000244	case	0.0194
742	PLXNA3_250622_250622_1	5	3088	0.0016	2	8184	0.000244	case	0.0194
743	EPB41L1_-_-_1	5	3088	0.0016	2	8184	0.000244	case	0.0194
744	GPR126_-_-_0	5	3088	0.0016	2	8184	0.000244	case	0.0194
745	ITGB4_249533_249533_0	5	3088	0.0016	2	8184	0.000244	case	0.0194
746	CELSR3_206637_206637_7	5	3088	0.0016	2	8184	0.000244	case	0.0194
747	EID2_-_-_0	5	3088	0.0016	2	8184	0.000244	case	0.0194
748	ZNF430_257789_257789_5	5	3088	0.0016	2	8184	0.000244	case	0.0194
749	RASAL3_-_-_0	5	3088	0.0016	2	8184	0.000244	case	0.0194
750	LTBP2_254326_254326_1	5	3088	0.0016	2	8184	0.000244	case	0.0194
751	LMBR1L_-_-_1	5	3088	0.0016	2	8184	0.000244	case	0.0194
752	TJP1_238492_238492_2	5	3088	0.0016	2	8184	0.000244	case	0.0194
753	FAM71F1_257078_257078_0	5	3088	0.0016	2	8184	0.000244	case	0.0194
754	LGMN_-_-_0	20	3073	0.0065	26	8160	0.0032	case	0.0196
755	ATL3_111185_111185_0	10	3083	0.0032	9	8177	0.0011	case	0.0196
756	EHD2_-_-_0	10	3083	0.0032	9	8177	0.0011	case	0.0196
757	ABCA10_-_-_4	10	3083	0.0032	9	8177	0.0011	case	0.0196
758	SGOL1_203682_203682_0	10	3083	0.0032	9	8177	0.0011	case	0.0196
759	JUP_237987_237987_2	10	3083	0.0032	9	8177	0.0011	case	0.0196
760	ENPP3_250310_250310_0	10	3083	0.0032	9	8177	0.0011	case	0.0196
761	SPRYD3_240488_240488_0	10	3083	0.0032	9	8177	0.0011	case	0.0196
762	CYP26A1_215171_215171_0	10	3083	0.0032	58	8128	0.0071	ctrl	0.0196
763	LRRC47_214876_214876_0	14	3079	0.0045	15	8171	0.0018	case	0.0196
764	ACRBP_148682_148682_0	14	3079	0.0045	15	8171	0.0018	case	0.0196
765	RUSC1_-_-_1	14	3079	0.0045	15	8171	0.0018	case	0.0196
766	KLHL18_128874_128874_0	14	3079	0.0045	15	8171	0.0018	case	0.0196
767	OSBPL5_-_-_2	14	3079	0.0045	15	8171	0.0018	case	0.0196
768	FSD1_-_-_0	12	3081	0.0039	12	8174	0.0015	case	0.02
769	RPUSD2_211331_211331_1	12	3081	0.0039	12	8174	0.0015	case	0.02
770	MAP3K3_-_-_1	12	3081	0.0039	12	8174	0.0015	case	0.02
771	SMOC1_-_-_3	12	3081	0.0039	12	8174	0.0015	case	0.02
772	TMIGD1_-_-_1	12	3081	0.0039	12	8174	0.0015	case	0.02
773	LRP2BP_-_-_0	12	3081	0.0039	12	8174	0.0015	case	0.02
774	ZBED4_-_-_1	9	3084	0.0029	7	8179	0.000855	case	0.02
775	PIK3CD_119434_119434_0	9	3084	0.0029	7	8179	0.000855	case	0.02
776	GNAZ_206639_206639_0	9	3084	0.0029	7	8179	0.000855	case	0.02
777	OLFM2_152743_152743_0	9	3084	0.0029	7	8179	0.000855	case	0.02
778	ZNF34_214630_214630_0	9	3084	0.0029	7	8179	0.000855	case	0.02
779	LAMC2_214597_214597_0	9	3084	0.0029	7	8179	0.000855	case	0.02
780	ZFAND4_176397_176397_0	9	3084	0.0029	7	8179	0.000855	case	0.02
781	EVA1A_258988_258988_0	9	3084	0.0029	7	8179	0.000855	case	0.02
782	USP25_-_-_2	9	3084	0.0029	7	8179	0.000855	case	0.02
783	AGAP1_250600_250600_0	9	3084	0.0029	7	8179	0.000855	case	0.02
784	SGIP1_-_-_0	12	3081	0.0039	64	8122	0.0078	ctrl	0.0203
785	CYP2C19_249556_249556_0	46	3047	0.0149	79	8107	0.0097	case	0.0204
786	GSS_238140_238140_0	28	3065	0.0091	41	8145	0.005	case	0.0205
787	MOGAT1_112781_112781_0	14	3079	0.0045	72	8114	0.0088	ctrl	0.0206
788	ANXA9_-_-_4	3	3090	0.00097	0	8186	0	case	0.0206
789	RAB40B_-_-_1	3	3090	0.00097	0	8186	0	case	0.0206
790	CNOT4_-_-_1	3	3090	0.00097	0	8186	0	case	0.0206
791	ZNF510_257789_257789_4	3	3090	0.00097	0	8186	0	case	0.0206
792	HLA-DOA_143244_143244_0	3	3090	0.00097	0	8186	0	case	0.0206
793	GNB1L_-_-_1	3	3090	0.00097	0	8186	0	case	0.0206
794	ITGA3_214549_214549_1	3	3090	0.00097	0	8186	0	case	0.0206
795	RFPL4B_-_-_0	3	3090	0.00097	0	8186	0	case	0.0206
796	JAK3_241488_241488_0	3	3090	0.00097	0	8186	0	case	0.0206
797	F2_-_-_2	3	3090	0.00097	0	8186	0	case	0.0206
798	HSPG2_-_-_10	3	3090	0.00097	0	8186	0	case	0.0206
799	EDIL3_238011_238011_2	3	3090	0.00097	0	8186	0	case	0.0206
800	DCBLD2_-_-_3	3	3090	0.00097	0	8186	0	case	0.0206
801	GRM3_254290_254290_0	3	3090	0.00097	0	8186	0	case	0.0206
802	COX17_252974_252974_0	3	3090	0.00097	0	8186	0	case	0.0206
803	ICAM5_143232_143232_0	3	3090	0.00097	0	8186	0	case	0.0206
804	KCNK12_-_-_2	3	3090	0.00097	0	8186	0	case	0.0206
805	PLA2G2D_-_-_1	3	3090	0.00097	0	8186	0	case	0.0206
806	MCC_-_-_4	3	3090	0.00097	0	8186	0	case	0.0206
807	PEX2_-_-_0	3	3090	0.00097	0	8186	0	case	0.0206
808	TXN2_-_-_1	3	3090	0.00097	0	8186	0	case	0.0206
809	ZNF7_-_-_11	3	3090	0.00097	0	8186	0	case	0.0206
810	LAMA3_249544_249544_3	3	3090	0.00097	0	8186	0	case	0.0206
811	OR6B2_-_-_0	3	3090	0.00097	0	8186	0	case	0.0206
812	TACC3_-_-_1	3	3090	0.00097	0	8186	0	case	0.0206
813	ADAMTS18_-_-_9	3	3090	0.00097	0	8186	0	case	0.0206
814	OOEP_-_-_0	3	3090	0.00097	0	8186	0	case	0.0206
815	ARNTL_-_-_1	3	3090	0.00097	0	8186	0	case	0.0206
816	CADM1_143289_143289_0	3	3090	0.00097	0	8186	0	case	0.0206
817	PLS3_237981_237981_1	3	3090	0.00097	0	8186	0	case	0.0206
818	SVEP1_153056_153056_21	3	3090	0.00097	0	8186	0	case	0.0206
819	KLRC1_-_-_1	3	3090	0.00097	0	8186	0	case	0.0206
820	OR2H2_258124_258124_0	3	3090	0.00097	0	8186	0	case	0.0206
821	NIPAL4_-_-_0	3	3090	0.00097	0	8186	0	case	0.0206
822	BAG2_-_-_1	3	3090	0.00097	0	8186	0	case	0.0206
823	GPX2_-_-_1	3	3090	0.00097	0	8186	0	case	0.0206
824	CPXM2_-_-_2	3	3090	0.00097	0	8186	0	case	0.0206
825	GABRB1_-_-_0	3	3090	0.00097	0	8186	0	case	0.0206
826	DTD1_-_-_0	3	3090	0.00097	0	8186	0	case	0.0206
827	LAMB4_-_-_0	3	3090	0.00097	0	8186	0	case	0.0206
828	CLCN7_-_-_1	3	3090	0.00097	0	8186	0	case	0.0206
829	ZNF71_257789_257789_5	3	3090	0.00097	0	8186	0	case	0.0206
830	ZNF496_249585_249585_0	3	3090	0.00097	0	8186	0	case	0.0206
831	ZFC3H1_238112_238112_1	3	3090	0.00097	0	8186	0	case	0.0206
832	C2orf82_-_-_0	3	3090	0.00097	0	8186	0	case	0.0206
833	SLC7A1_-_-_0	3	3090	0.00097	0	8186	0	case	0.0206
834	ZNF83_257789_257789_0	3	3090	0.00097	0	8186	0	case	0.0206
835	PPP1R13L_-_-_1	3	3090	0.00097	0	8186	0	case	0.0206
836	ZNF479_-_-_0	3	3090	0.00097	0	8186	0	case	0.0206
837	ZNF709_257789_257789_3	3	3090	0.00097	0	8186	0	case	0.0206
838	UBE2N_240397_240397_0	3	3090	0.00097	0	8186	0	case	0.0206
839	AGRN_-_-_10	3	3090	0.00097	0	8186	0	case	0.0206
840	EPB41L5_255329_255329_0	3	3090	0.00097	0	8186	0	case	0.0206
841	SOCS7_239710_239710_0	3	3090	0.00097	0	8186	0	case	0.0206
842	TRIM37_-_-_2	3	3090	0.00097	0	8186	0	case	0.0206
843	HES1_-_-_2	3	3090	0.00097	0	8186	0	case	0.0206
844	ZNF878_257789_257789_4	3	3090	0.00097	0	8186	0	case	0.0206
845	NRN1_-_-_0	3	3090	0.00097	0	8186	0	case	0.0206
846	RYR2_-_-_1	3	3090	0.00097	0	8186	0	case	0.0206
847	CSRP1_-_-_0	3	3090	0.00097	0	8186	0	case	0.0206
848	PPIL1_-_-_1	3	3090	0.00097	0	8186	0	case	0.0206
849	SPATA13_-_-_1	3	3090	0.00097	0	8186	0	case	0.0206
850	KLHL13_128874_128874_1	3	3090	0.00097	0	8186	0	case	0.0206
851	CSE1L_197981_197981_0	3	3090	0.00097	0	8186	0	case	0.0206
852	PNMT_-_-_1	3	3090	0.00097	0	8186	0	case	0.0206
853	AP5S1_-_-_0	3	3090	0.00097	0	8186	0	case	0.0206
854	TNFAIP6_-_-_0	3	3090	0.00097	0	8186	0	case	0.0206
855	F13B_153056_153056_5	3	3090	0.00097	0	8186	0	case	0.0206
856	FCRL5_143229_143229_0	3	3090	0.00097	0	8186	0	case	0.0206
857	ZNF287_-_-_11	3	3090	0.00097	0	8186	0	case	0.0206
858	ZNF248_257789_257789_3	3	3090	0.00097	0	8186	0	case	0.0206
859	FOXC1_-_-_0	3	3090	0.00097	0	8186	0	case	0.0206
860	IFT88_238112_238112_2	3	3090	0.00097	0	8186	0	case	0.0206
861	CFB_-_-_5	3	3090	0.00097	0	8186	0	case	0.0206
862	STAT4_249511_249511_0	3	3090	0.00097	0	8186	0	case	0.0206
863	IGSF1_143228_143228_1	3	3090	0.00097	0	8186	0	case	0.0206
864	ZSCAN16_-_-_4	3	3090	0.00097	0	8186	0	case	0.0206
865	GTPBP1_-_-_2	3	3090	0.00097	0	8186	0	case	0.0206
866	LRPAP1_-_-_1	3	3090	0.00097	0	8186	0	case	0.0206
867	NPM1_-_-_0	3	3090	0.00097	0	8186	0	case	0.0206
868	ZNF117_257789_257789_3	3	3090	0.00097	0	8186	0	case	0.0206
869	COPS3_-_-_0	3	3090	0.00097	0	8186	0	case	0.0206
870	TAF1_-_-_2	3	3090	0.00097	0	8186	0	case	0.0206
871	MYBPHL_-_-_2	3	3090	0.00097	0	8186	0	case	0.0206
872	TMEM14E_252083_252083_0	3	3090	0.00097	0	8186	0	case	0.0206
873	PRKCD_249614_249614_1	3	3090	0.00097	0	8186	0	case	0.0206
874	RASSF9_-_-_1	3	3090	0.00097	0	8186	0	case	0.0206
875	OR5V1_-_-_0	3	3090	0.00097	0	8186	0	case	0.0206
876	USP19_239139_239139_2	3	3090	0.00097	0	8186	0	case	0.0206
877	ZKSCAN8_257789_257789_5	3	3090	0.00097	0	8186	0	case	0.0206
878	PAPPA_153056_153056_1	3	3090	0.00097	0	8186	0	case	0.0206
879	CNNM1_-_-_1	3	3090	0.00097	0	8186	0	case	0.0206
880	SOD1_-_-_1	3	3090	0.00097	0	8186	0	case	0.0206
881	C12orf57_259111_259111_0	3	3090	0.00097	0	8186	0	case	0.0206
882	TFAP2B_-_-_1	3	3090	0.00097	0	8186	0	case	0.0206
883	ZFP90_257789_257789_0	3	3090	0.00097	0	8186	0	case	0.0206
884	ADAMTS12_-_-_0	3	3090	0.00097	0	8186	0	case	0.0206
885	PLXNB3_250622_250622_0	3	3090	0.00097	0	8186	0	case	0.0206
886	COMMD1_-_-_1	3	3090	0.00097	0	8186	0	case	0.0206
887	COMMD1_-_-_0	3	3090	0.00097	0	8186	0	case	0.0206
888	CHIC1_255855_255855_0	3	3090	0.00097	0	8186	0	case	0.0206
889	NUDT12_-_-_1	3	3090	0.00097	0	8186	0	case	0.0206
890	ZFP28_257789_257789_6	3	3090	0.00097	0	8186	0	case	0.0206
891	DCHS2_-_-_22	3	3090	0.00097	0	8186	0	case	0.0206
892	VCP_215011_215011_0	3	3090	0.00097	0	8186	0	case	0.0206
893	EML1_-_-_2	3	3090	0.00097	0	8186	0	case	0.0206
894	SPATA31D1_-_-_2	66	3027	0.0213	122	8064	0.0149	case	0.0207
895	ZNFX1_-_-_4	25	3068	0.0081	36	8150	0.0044	case	0.0211
896	FANCE_256491_256491_0	25	3068	0.0081	36	8150	0.0044	case	0.0211
897	PPP6R3_-_-_1	25	3068	0.0081	36	8150	0.0044	case	0.0211
898	PPP1R3A_-_-_0	25	3068	0.0081	36	8150	0.0044	case	0.0211
899	ARFGAP2_-_-_0	25	3068	0.0081	36	8150	0.0044	case	0.0211
900	NEO1_-_-_10	34	3059	0.011	53	8133	0.0065	case	0.0211
901	OR52A5_255903_255903_0	16	3077	0.0052	19	8167	0.0023	case	0.0215
902	KIAA1143_259509_259509_0	16	3077	0.0052	19	8167	0.0023	case	0.0215
903	CHST11_-_-_0	16	3077	0.0052	19	8167	0.0023	case	0.0215
904	BRICD5_198107_198107_0	16	3077	0.0052	19	8167	0.0023	case	0.0215
905	TANC2_-_-_3	21	3072	0.0068	96	8090	0.0117	ctrl	0.0215
906	HIST1H2BI_-_-_0	6	3087	0.0019	41	8145	0.005	ctrl	0.0217
907	OPRM1_255910_255910_0	6	3087	0.0019	41	8145	0.005	ctrl	0.0217
908	ZNF782_-_-_10	6	3087	0.0019	41	8145	0.005	ctrl	0.0217
909	SWSAP1_-_-_0	6	3087	0.0019	41	8145	0.005	ctrl	0.0217
910	CYLC2_-_-_1	6	3087	0.0019	41	8145	0.005	ctrl	0.0217
911	ESYT3_-_-_2	6	3087	0.0019	41	8145	0.005	ctrl	0.0217
912	FAM228A_-_-_0	6	3087	0.0019	41	8145	0.005	ctrl	0.0217
913	SMEK2_-_-_0	9	3084	0.0029	53	8133	0.0065	ctrl	0.0219
914	PELP1_-_-_0	6	3087	0.0019	42	8144	0.0051	ctrl	0.022
915	ACAD11_173844_173844_0	6	3087	0.0019	42	8144	0.0051	ctrl	0.022
916	TPX2_-_-_0	6	3087	0.0019	42	8144	0.0051	ctrl	0.022
917	TRAK2_-_-_3	6	3087	0.0019	42	8144	0.0051	ctrl	0.022
918	OTOF_176019_176019_0	6	3087	0.0019	42	8144	0.0051	ctrl	0.022
919	ZC3H12C_-_-_1	28	3065	0.0091	42	8144	0.0051	case	0.022
920	CUX2_-_-_2	4	3089	0.0013	1	8185	0.000122	case	0.022
921	PLCL2_175974_175974_0	4	3089	0.0013	1	8185	0.000122	case	0.022
922	ZNF823_-_-_0	4	3089	0.0013	1	8185	0.000122	case	0.022
923	ZNF737_-_-_5	4	3089	0.0013	1	8185	0.000122	case	0.022
924	IRS1_241240_241240_0	4	3089	0.0013	1	8185	0.000122	case	0.022
925	COPZ1_-_-_1	4	3089	0.0013	1	8185	0.000122	case	0.022
926	CAMKV_-_-_1	4	3089	0.0013	1	8185	0.000122	case	0.022
927	ZNF606_257789_257789_3	4	3089	0.0013	1	8185	0.000122	case	0.022
928	SELP_153056_153056_4	4	3089	0.0013	1	8185	0.000122	case	0.022
929	KIFAP3_237987_237987_0	4	3089	0.0013	1	8185	0.000122	case	0.022
930	KLHL20_250031_250031_0	4	3089	0.0013	1	8185	0.000122	case	0.022
931	NPHP1_212704_212704_0	4	3089	0.0013	1	8185	0.000122	case	0.022
932	NTN3_238012_238012_2	4	3089	0.0013	1	8185	0.000122	case	0.022
933	RFFL_-_-_2	4	3089	0.0013	1	8185	0.000122	case	0.022
934	ZNF551_-_-_6	4	3089	0.0013	1	8185	0.000122	case	0.022
935	ZNF335_257789_257789_1	4	3089	0.0013	1	8185	0.000122	case	0.022
936	SCAI_-_-_0	4	3089	0.0013	1	8185	0.000122	case	0.022
937	EPB41L5_255008_255008_0	4	3089	0.0013	1	8185	0.000122	case	0.022
938	TRPC1_-_-_0	4	3089	0.0013	1	8185	0.000122	case	0.022
939	ZNF860_257789_257789_1	4	3089	0.0013	1	8185	0.000122	case	0.022
940	ZPBP2_-_-_0	4	3089	0.0013	1	8185	0.000122	case	0.022
941	CXCL5_-_-_1	4	3089	0.0013	1	8185	0.000122	case	0.022
942	ANKS6_188917_188917_0	4	3089	0.0013	1	8185	0.000122	case	0.022
943	IRF7_-_-_0	4	3089	0.0013	1	8185	0.000122	case	0.022
944	FBN2_214542_214542_12	4	3089	0.0013	1	8185	0.000122	case	0.022
945	HS3ST3B1_-_-_1	4	3089	0.0013	1	8185	0.000122	case	0.022
946	DEFB127_-_-_0	4	3089	0.0013	1	8185	0.000122	case	0.022
947	SDK1_238020_238020_2	4	3089	0.0013	1	8185	0.000122	case	0.022
948	UMOD_254326_254326_0	4	3089	0.0013	1	8185	0.000122	case	0.022
949	TCEAL8_191022_191022_0	4	3089	0.0013	1	8185	0.000122	case	0.022
950	RRM1_-_-_0	4	3089	0.0013	1	8185	0.000122	case	0.022
951	ZSCAN23_-_-_0	4	3089	0.0013	1	8185	0.000122	case	0.022
952	SEPT1_-_-_0	4	3089	0.0013	1	8185	0.000122	case	0.022
953	RNF180_238093_238093_0	4	3089	0.0013	1	8185	0.000122	case	0.022
954	PNMA3_259030_259030_0	4	3089	0.0013	1	8185	0.000122	case	0.022
955	ZSCAN29_257789_257789_3	4	3089	0.0013	1	8185	0.000122	case	0.022
956	PLXND1_-_-_2	4	3089	0.0013	1	8185	0.000122	case	0.022
957	DLG3_256082_256082_0	4	3089	0.0013	1	8185	0.000122	case	0.022
958	SOX14_238684_238684_0	4	3089	0.0013	1	8185	0.000122	case	0.022
959	KLHL6_-_-_5	4	3089	0.0013	1	8185	0.000122	case	0.022
960	DHX16_-_-_2	4	3089	0.0013	1	8185	0.000122	case	0.022
961	UBA3_-_-_2	4	3089	0.0013	1	8185	0.000122	case	0.022
962	LAMA4_-_-_10	4	3089	0.0013	1	8185	0.000122	case	0.022
963	DNMT3L_-_-_1	4	3089	0.0013	1	8185	0.000122	case	0.022
964	ITGA2_-_-_1	4	3089	0.0013	1	8185	0.000122	case	0.022
965	C3orf58_256939_256939_0	4	3089	0.0013	1	8185	0.000122	case	0.022
966	SPANXN5_148837_148837_0	4	3089	0.0013	1	8185	0.000122	case	0.022
967	CNTN1_-_-_10	4	3089	0.0013	1	8185	0.000122	case	0.022
968	HSD11B2_-_-_1	4	3089	0.0013	1	8185	0.000122	case	0.022
969	PIK3C2B_250138_250138_0	4	3089	0.0013	1	8185	0.000122	case	0.022
970	PLTP_-_-_2	4	3089	0.0013	1	8185	0.000122	case	0.022
971	APOM_256260_256260_0	4	3089	0.0013	1	8185	0.000122	case	0.022
972	CDC42_206664_206664_0	4	3089	0.0013	1	8185	0.000122	case	0.022
973	ZNF619_257789_257789_3	4	3089	0.0013	1	8185	0.000122	case	0.022
974	SALL3_257789_257789_1	4	3089	0.0013	1	8185	0.000122	case	0.022
975	ABCB11_-_-_2	4	3089	0.0013	1	8185	0.000122	case	0.022
976	H2AFY2_238029_238029_0	4	3089	0.0013	1	8185	0.000122	case	0.022
977	MAP2K3_-_-_0	4	3089	0.0013	1	8185	0.000122	case	0.022
978	NKX6-1_-_-_1	4	3089	0.0013	1	8185	0.000122	case	0.022
979	ZNF2_257789_257789_5	4	3089	0.0013	1	8185	0.000122	case	0.022
980	SND1_-_-_0	4	3089	0.0013	1	8185	0.000122	case	0.022
981	TMPRSS5_-_-_0	4	3089	0.0013	1	8185	0.000122	case	0.022
982	THUMPD3_-_-_0	4	3089	0.0013	1	8185	0.000122	case	0.022
983	SLC23A1_-_-_0	4	3089	0.0013	1	8185	0.000122	case	0.022
984	IL21_251257_251257_0	4	3089	0.0013	1	8185	0.000122	case	0.022
985	LTBP2_-_-_10	4	3089	0.0013	1	8185	0.000122	case	0.022
986	KLHL38_250548_250548_1	4	3089	0.0013	1	8185	0.000122	case	0.022
987	PTPRH_-_-_7	4	3089	0.0013	1	8185	0.000122	case	0.022
988	COL22A1_189968_189968_1	4	3089	0.0013	1	8185	0.000122	case	0.022
989	AKR7A2_-_-_0	4	3089	0.0013	1	8185	0.000122	case	0.022
990	RBM15B_241000_241000_0	4	3089	0.0013	1	8185	0.000122	case	0.022
991	C3orf35_-_-_0	4	3089	0.0013	1	8185	0.000122	case	0.022
992	CDCP2_-_-_3	4	3089	0.0013	1	8185	0.000122	case	0.022
993	ABCA9_-_-_2	4	3089	0.0013	1	8185	0.000122	case	0.022
994	ZNF257_257789_257789_6	4	3089	0.0013	1	8185	0.000122	case	0.022
995	SYNE1_238103_238103_0	23	3070	0.0074	32	8154	0.0039	case	0.0222
996	TRIM47_240471_240471_0	18	3075	0.0058	23	8163	0.0028	case	0.0224
997	BAK1_132900_132900_0	18	3075	0.0058	23	8163	0.0028	case	0.0224
998	F13A1_250232_250232_1	18	3075	0.0058	23	8163	0.0028	case	0.0224
999	RAD54B_-_-_0	1	3092	0.000323	19	8167	0.0023	ctrl	0.0224
1000	ENPP2_197571_197571_0	1	3092	0.000323	19	8167	0.0023	ctrl	0.0224
1001	C19orf66_259271_259271_0	1	3092	0.000323	19	8167	0.0023	ctrl	0.0224
1002	RECQL_249732_249732_0	1	3092	0.000323	19	8167	0.0023	ctrl	0.0224
1003	LIMS2_188720_188720_0	1	3092	0.000323	19	8167	0.0023	ctrl	0.0224
1004	UNC5CL_-_-_2	1	3092	0.000323	19	8167	0.0023	ctrl	0.0224
1005	CDH16_-_-_0	1	3092	0.000323	19	8167	0.0023	ctrl	0.0224
1006	SLC14A1_-_-_0	1	3092	0.000323	19	8167	0.0023	ctrl	0.0224
1007	PCDHA10_206637_206637_1	1	3092	0.000323	19	8167	0.0023	ctrl	0.0224
1008	PSMB1_239726_239726_0	1	3092	0.000323	19	8167	0.0023	ctrl	0.0224
1009	SRP72_238112_238112_0	1	3092	0.000323	19	8167	0.0023	ctrl	0.0224
1010	CIB2_238008_238008_0	1	3092	0.000323	19	8167	0.0023	ctrl	0.0224
1011	CHDH_253079_253079_0	1	3092	0.000323	19	8167	0.0023	ctrl	0.0224
1012	TRMT2B_-_-_1	1	3092	0.000323	19	8167	0.0023	ctrl	0.0224
1013	NDUFB5_255549_255549_0	1	3092	0.000323	19	8167	0.0023	ctrl	0.0224
1014	COL6A6_238749_238749_2	1	3092	0.000323	19	8167	0.0023	ctrl	0.0224
1015	OLFM2_-_-_1	1	3092	0.000323	19	8167	0.0023	ctrl	0.0224
1016	C15orf26_-_-_0	1	3092	0.000323	19	8167	0.0023	ctrl	0.0224
1017	CDH2_255020_255020_0	1	3092	0.000323	19	8167	0.0023	ctrl	0.0224
1018	DNAI1_238121_238121_0	11	3082	0.0036	60	8126	0.0073	ctrl	0.023
1019	DFNA5_252693_252693_0	17	3076	0.0055	81	8105	0.0099	ctrl	0.023
1020	CHRM5_-_-_0	17	3076	0.0055	82	8104	0.01	ctrl	0.0231
1021	CDCP2_-_-_0	21	3072	0.0068	28	8158	0.0034	case	0.0233
1022	GTF2H1_-_-_3	5	3088	0.0016	37	8149	0.0045	ctrl	0.0235
1023	FGF6_249646_249646_0	5	3088	0.0016	37	8149	0.0045	ctrl	0.0235
1024	DOCK9_212571_212571_0	5	3088	0.0016	37	8149	0.0045	ctrl	0.0235
1025	ABHD1_182883_182883_0	15	3078	0.0048	75	8111	0.0092	ctrl	0.0235
1026	UROC1_-_-_2	14	3079	0.0045	16	8170	0.002	case	0.0236
1027	CELSR1_197639_197639_0	14	3079	0.0045	16	8170	0.002	case	0.0236
1028	PTX3_128463_128463_0	14	3079	0.0045	16	8170	0.002	case	0.0236
1029	ZNF555_-_-_1	14	3079	0.0045	16	8170	0.002	case	0.0236
1030	DGKG_258653_258653_0	13	3080	0.0042	68	8118	0.0083	ctrl	0.0237
1031	LAIR2_-_-_0	7	3086	0.0023	5	8181	0.000611	case	0.0238
1032	ZNF510_257789_257789_2	7	3086	0.0023	5	8181	0.000611	case	0.0238
1033	L3MBTL2_-_-_2	7	3086	0.0023	5	8181	0.000611	case	0.0238
1034	FMR1_-_-_4	7	3086	0.0023	5	8181	0.000611	case	0.0238
1035	ADRA2B_255910_255910_0	7	3086	0.0023	5	8181	0.000611	case	0.0238
1036	WDR62_238121_238121_0	7	3086	0.0023	5	8181	0.000611	case	0.0238
1037	ATP1B1_162204_162204_0	7	3086	0.0023	5	8181	0.000611	case	0.0238
1038	RNF185_-_-_1	7	3086	0.0023	5	8181	0.000611	case	0.0238
1039	VTI1B_-_-_0	7	3086	0.0023	5	8181	0.000611	case	0.0238
1040	TNS3_198181_198181_0	7	3086	0.0023	5	8181	0.000611	case	0.0238
1041	ZNF486_257789_257789_2	7	3086	0.0023	5	8181	0.000611	case	0.0238
1042	DRAM2_-_-_0	7	3086	0.0023	5	8181	0.000611	case	0.0238
1043	CRY1_-_-_0	7	3086	0.0023	5	8181	0.000611	case	0.0238
1044	VAMP3_250253_250253_0	7	3086	0.0023	5	8181	0.000611	case	0.0238
1045	HMCN1_143207_143207_13	7	3086	0.0023	5	8181	0.000611	case	0.0238
1046	SLC26A4_-_-_0	7	3086	0.0023	5	8181	0.000611	case	0.0238
1047	ZNF665_257789_257789_5	7	3086	0.0023	5	8181	0.000611	case	0.0238
1048	PLK2_173724_173724_0	7	3086	0.0023	5	8181	0.000611	case	0.0238
1049	ZNF33A_-_-_5	7	3086	0.0023	5	8181	0.000611	case	0.0238
1050	AMIGO2_-_-_0	7	3086	0.0023	5	8181	0.000611	case	0.0238
1051	RBM15B_-_-_4	7	3086	0.0023	5	8181	0.000611	case	0.0238
1052	MDN1_254388_254388_5	7	3086	0.0023	5	8181	0.000611	case	0.0238
1053	CDH2_250323_250323_0	7	3086	0.0023	5	8181	0.000611	case	0.0238
1054	PTPRU_238020_238020_0	7	3086	0.0023	5	8181	0.000611	case	0.0238
1055	PTPRJ_238020_238020_0	7	3086	0.0023	5	8181	0.000611	case	0.0238
1056	PNPLA7_-_-_2	7	3086	0.0023	5	8181	0.000611	case	0.0238
1057	FBXO44_257418_257418_0	7	3086	0.0023	5	8181	0.000611	case	0.0238
1058	IL2RA_153056_153056_0	7	3086	0.0023	5	8181	0.000611	case	0.0238
1059	UNC93A_-_-_0	7	3086	0.0023	5	8181	0.000611	case	0.0238
1060	RPL14_-_-_1	7	3086	0.0023	5	8181	0.000611	case	0.0238
1061	PDIA3_239293_239293_1	7	3086	0.0023	5	8181	0.000611	case	0.0238
1062	LMBRD1_-_-_1	7	3086	0.0023	5	8181	0.000611	case	0.0238
1063	SCOC_-_-_0	7	3086	0.0023	5	8181	0.000611	case	0.0238
1064	ZNF709_-_-_6	7	3086	0.0023	5	8181	0.000611	case	0.0238
1065	HSPB8_-_-_0	7	3086	0.0023	5	8181	0.000611	case	0.0238
1066	KRTAP10-8_-_-_0	41	3052	0.0133	69	8117	0.0084	case	0.0238
1067	RORC_-_-_1	1	3092	0.000323	20	8166	0.0024	ctrl	0.0239
1068	COMMD10_240106_240106_0	1	3092	0.000323	20	8166	0.0024	ctrl	0.0239
1069	FLNB_214720_214720_18	1	3092	0.000323	20	8166	0.0024	ctrl	0.0239
1070	OR13F1_258124_258124_0	1	3092	0.000323	20	8166	0.0024	ctrl	0.0239
1071	RPL35_-_-_0	1	3092	0.000323	20	8166	0.0024	ctrl	0.0239
1072	ZFP28_-_-_14	1	3092	0.000323	20	8166	0.0024	ctrl	0.0239
1073	NLRC5_238064_238064_0	1	3092	0.000323	20	8166	0.0024	ctrl	0.0239
1074	PLA2G3_-_-_2	1	3092	0.000323	20	8166	0.0024	ctrl	0.0239
1075	AJUBA_-_-_3	1	3092	0.000323	20	8166	0.0024	ctrl	0.0239
1076	ZFAND2A_250613_250613_1	1	3092	0.000323	20	8166	0.0024	ctrl	0.0239
1077	SPTB_238103_238103_1	19	3074	0.0061	24	8162	0.0029	case	0.0243
1078	CCDC149_-_-_0	32	3061	0.0103	50	8136	0.0061	case	0.0246
1079	RGS5_188672_188672_0	8	3085	0.0026	48	8138	0.0059	ctrl	0.0246
1080	ASAH1_-_-_1	8	3085	0.0026	48	8138	0.0059	ctrl	0.0246
1081	ASAP2_-_-_4	8	3085	0.0026	48	8138	0.0059	ctrl	0.0246
1082	TM2D3_-_-_1	8	3085	0.0026	48	8138	0.0059	ctrl	0.0246
1083	PLEKHG2_-_-_1	44	3049	0.0142	170	8016	0.0208	ctrl	0.0246
1084	ARHGEF15_-_-_0	8	3085	0.0026	49	8137	0.006	ctrl	0.0246
1085	PRTFDC1_240293_240293_0	8	3085	0.0026	49	8137	0.006	ctrl	0.0246
1086	ITIH1_-_-_2	8	3085	0.0026	49	8137	0.006	ctrl	0.0246
1087	COL5A2_197483_197483_0	8	3085	0.0026	49	8137	0.006	ctrl	0.0246
1088	ITPKB_-_-_1	38	3055	0.0123	63	8123	0.0077	case	0.0248
1089	BFSP2_-_-_0	38	3055	0.0123	63	8123	0.0077	case	0.0248
1090	KIAA1045_-_-_0	20	3073	0.0065	92	8094	0.0112	ctrl	0.0248
1091	MC1R_-_-_0	20	3073	0.0065	92	8094	0.0112	ctrl	0.0248
1092	CELSR2_249498_249498_0	4	3089	0.0013	32	8154	0.0039	ctrl	0.025
1093	PLRG1_-_-_1	4	3089	0.0013	32	8154	0.0039	ctrl	0.025
1094	ANKRD13D_256714_256714_0	4	3089	0.0013	32	8154	0.0039	ctrl	0.025
1095	HS6ST3_252031_252031_0	4	3089	0.0013	32	8154	0.0039	ctrl	0.025
1096	MCM9_-_-_1	4	3089	0.0013	32	8154	0.0039	ctrl	0.025
1097	POLD2_-_-_1	4	3089	0.0013	32	8154	0.0039	ctrl	0.025
1098	CDC7_173623_173623_0	4	3089	0.0013	32	8154	0.0039	ctrl	0.025
1099	LDLRAD4_-_-_1	4	3089	0.0013	32	8154	0.0039	ctrl	0.025
1100	PDIA2_239293_239293_0	4	3089	0.0013	32	8154	0.0039	ctrl	0.025
1101	ANKMY2_238125_238125_0	4	3089	0.0013	32	8154	0.0039	ctrl	0.025
1102	ANKRD23_238125_238125_0	4	3089	0.0013	33	8153	0.004	ctrl	0.0252
1103	C2CD3_-_-_0	4	3089	0.0013	33	8153	0.004	ctrl	0.0252
1104	ALPK3_214828_214828_0	4	3089	0.0013	33	8153	0.004	ctrl	0.0252
1105	ANGPTL1_238040_238040_0	4	3089	0.0013	33	8153	0.004	ctrl	0.0252
1106	CDC42BPB_250127_250127_0	4	3089	0.0013	33	8153	0.004	ctrl	0.0252
1107	NPNT_99706_99706_0	2	3091	0.000647	23	8163	0.0028	ctrl	0.0254
1108	FANCM_238005_238005_0	2	3091	0.000647	23	8163	0.0028	ctrl	0.0254
1109	OR8S1_258124_258124_0	2	3091	0.000647	23	8163	0.0028	ctrl	0.0254
1110	PCDHGA5_206637_206637_1	2	3091	0.000647	23	8163	0.0028	ctrl	0.0254
1111	LIG4_252736_252736_0	2	3091	0.000647	23	8163	0.0028	ctrl	0.0254
1112	RGS3_176067_176067_0	2	3091	0.000647	23	8163	0.0028	ctrl	0.0254
1113	TTLL10_-_-_0	2	3091	0.000647	23	8163	0.0028	ctrl	0.0254
1114	ERAP2_-_-_1	2	3091	0.000647	23	8163	0.0028	ctrl	0.0254
1115	TIMP1_128502_128502_0	2	3091	0.000647	23	8163	0.0028	ctrl	0.0254
1116	CCDC3_-_-_0	2	3091	0.000647	23	8163	0.0028	ctrl	0.0254
1117	PCDHGA6_-_-_0	2	3091	0.000647	23	8163	0.0028	ctrl	0.0254
1118	PAPPA_-_-_2	2	3091	0.000647	23	8163	0.0028	ctrl	0.0254
1119	LAMA1_189364_189364_0	2	3091	0.000647	23	8163	0.0028	ctrl	0.0254
1120	KCNK4_-_-_2	2	3091	0.000647	23	8163	0.0028	ctrl	0.0254
1121	PIKFYVE_-_-_2	2	3091	0.000647	23	8163	0.0028	ctrl	0.0254
1122	DCLK1_-_-_1	2	3091	0.000647	24	8162	0.0029	ctrl	0.0255
1123	TNFAIP1_-_-_1	2	3091	0.000647	24	8162	0.0029	ctrl	0.0255
1124	PDPK1_-_-_1	2	3091	0.000647	24	8162	0.0029	ctrl	0.0255
1125	ABCA5_213230_213230_0	2	3091	0.000647	24	8162	0.0029	ctrl	0.0255
1126	OTOP2_-_-_0	2	3091	0.000647	24	8162	0.0029	ctrl	0.0255
1127	SHB_-_-_1	2	3091	0.000647	24	8162	0.0029	ctrl	0.0255
1128	DTL_-_-_1	2	3091	0.000647	24	8162	0.0029	ctrl	0.0255
1129	PDCD2L_-_-_0	2	3091	0.000647	24	8162	0.0029	ctrl	0.0255
1130	ZNF613_-_-_5	2	3091	0.000647	24	8162	0.0029	ctrl	0.0255
1131	EPX_-_-_0	2	3091	0.000647	24	8162	0.0029	ctrl	0.0255
1132	XBP1_-_-_0	2	3091	0.000647	24	8162	0.0029	ctrl	0.0255
1133	A2ML1_-_-_0	2	3091	0.000647	24	8162	0.0029	ctrl	0.0255
1134	PCDHB5_-_-_6	2	3091	0.000647	24	8162	0.0029	ctrl	0.0255
1135	NRP2_99706_99706_0	2	3091	0.000647	24	8162	0.0029	ctrl	0.0255
1136	XRCC3_238543_238543_0	24	3069	0.0078	34	8152	0.0042	case	0.0256
1137	NUFIP1_-_-_0	21	3072	0.0068	29	8157	0.0035	case	0.0257
1138	SLC32A1_250658_250658_0	3	3090	0.00097	28	8158	0.0034	ctrl	0.0257
1139	STRN_238121_238121_0	3	3090	0.00097	28	8158	0.0034	ctrl	0.0257
1140	TNFAIP8L2_114259_114259_0	3	3090	0.00097	28	8158	0.0034	ctrl	0.0257
1141	UBTD1_-_-_0	3	3090	0.00097	28	8158	0.0034	ctrl	0.0257
1142	DBH_250349_250349_0	3	3090	0.00097	28	8158	0.0034	ctrl	0.0257
1143	DLG5_181091_181091_0	3	3090	0.00097	28	8158	0.0034	ctrl	0.0257
1144	AMN1_187754_187754_0	3	3090	0.00097	28	8158	0.0034	ctrl	0.0257
1145	SALL2_-_-_2	3	3090	0.00097	28	8158	0.0034	ctrl	0.0257
1146	ZCCHC12_-_-_1	3	3090	0.00097	28	8158	0.0034	ctrl	0.0257
1147	AIM1_-_-_0	53	3040	0.0171	95	8091	0.0116	case	0.0257
1148	CCDC132_151040_151040_0	0	3093	0	13	8173	0.0016	ctrl	0.0257
1149	ZNF19_257789_257789_5	0	3093	0	13	8173	0.0016	ctrl	0.0257
1150	RNF122_-_-_1	0	3093	0	13	8173	0.0016	ctrl	0.0257
1151	EPOR_255160_255160_0	0	3093	0	13	8173	0.0016	ctrl	0.0257
1152	KLHL11_-_-_0	0	3093	0	13	8173	0.0016	ctrl	0.0257
1153	PCDH9_-_-_0	0	3093	0	13	8173	0.0016	ctrl	0.0257
1154	WDR7_238121_238121_1	0	3093	0	13	8173	0.0016	ctrl	0.0257
1155	PIAS2_111745_111745_0	0	3093	0	13	8173	0.0016	ctrl	0.0257
1156	OR6N2_-_-_1	0	3093	0	13	8173	0.0016	ctrl	0.0257
1157	C22orf31_259709_259709_0	0	3093	0	13	8173	0.0016	ctrl	0.0257
1158	GIPC3_238492_238492_0	0	3093	0	13	8173	0.0016	ctrl	0.0257
1159	TNS3_241249_241249_0	0	3093	0	13	8173	0.0016	ctrl	0.0257
1160	SDK1_-_-_11	0	3093	0	13	8173	0.0016	ctrl	0.0257
1161	ASTE1_189027_189027_0	0	3093	0	13	8173	0.0016	ctrl	0.0257
1162	USH2A_238020_238020_24	0	3093	0	13	8173	0.0016	ctrl	0.0257
1163	AGO3_240015_240015_0	0	3093	0	13	8173	0.0016	ctrl	0.0257
1164	LRG1_-_-_2	0	3093	0	13	8173	0.0016	ctrl	0.0257
1165	PARD6B_99724_99724_0	0	3093	0	13	8173	0.0016	ctrl	0.0257
1166	ZNF226_257789_257789_9	0	3093	0	13	8173	0.0016	ctrl	0.0257
1167	TIFAB_-_-_0	0	3093	0	13	8173	0.0016	ctrl	0.0257
1168	CDC34_-_-_1	0	3093	0	13	8173	0.0016	ctrl	0.0257
1169	PEX10_257949_257949_0	0	3093	0	13	8173	0.0016	ctrl	0.0257
1170	RTL1_238825_238825_0	0	3093	0	13	8173	0.0016	ctrl	0.0257
1171	RB1_149868_149868_0	0	3093	0	13	8173	0.0016	ctrl	0.0257
1172	MYOZ1_-_-_1	0	3093	0	13	8173	0.0016	ctrl	0.0257
1173	SEC62_-_-_0	0	3093	0	13	8173	0.0016	ctrl	0.0257
1174	TJP2_-_-_1	0	3093	0	13	8173	0.0016	ctrl	0.0257
1175	PTRH2_239108_239108_0	0	3093	0	13	8173	0.0016	ctrl	0.0257
1176	MUM1L1_-_-_0	0	3093	0	13	8173	0.0016	ctrl	0.0257
1177	NCF2_-_-_3	0	3093	0	13	8173	0.0016	ctrl	0.0257
1178	IFT88_-_-_1	0	3093	0	13	8173	0.0016	ctrl	0.0257
1179	SDF2_197746_197746_1	0	3093	0	13	8173	0.0016	ctrl	0.0257
1180	PKP1_237987_237987_1	0	3093	0	13	8173	0.0016	ctrl	0.0257
1181	CDC14B_258809_258809_0	0	3093	0	13	8173	0.0016	ctrl	0.0257
1182	TRIM2_128778_128778_0	0	3093	0	13	8173	0.0016	ctrl	0.0257
1183	LAMA4_-_-_7	0	3093	0	13	8173	0.0016	ctrl	0.0257
1184	RWDD2A_214735_214735_0	0	3093	0	13	8173	0.0016	ctrl	0.0257
1185	HYI_-_-_0	0	3093	0	13	8173	0.0016	ctrl	0.0257
1186	FCN2_-_-_0	0	3093	0	13	8173	0.0016	ctrl	0.0257
1187	TNK2_-_-_5	0	3093	0	13	8173	0.0016	ctrl	0.0257
1188	ZFP36_-_-_1	0	3093	0	13	8173	0.0016	ctrl	0.0257
1189	GOLGA5_-_-_1	0	3093	0	13	8173	0.0016	ctrl	0.0257
1190	DMBT1_-_-_13	0	3093	0	13	8173	0.0016	ctrl	0.0257
1191	SPSB2_239689_239689_0	0	3093	0	13	8173	0.0016	ctrl	0.0257
1192	TLR7_-_-_0	0	3093	0	13	8173	0.0016	ctrl	0.0257
1193	TRAPPC12_-_-_1	0	3093	0	13	8173	0.0016	ctrl	0.0257
1194	TTN_143224_143224_17	0	3093	0	13	8173	0.0016	ctrl	0.0257
1195	WDSUB1_238121_238121_0	26	3067	0.0084	39	8147	0.0048	case	0.0259
1196	USP36_239126_239126_0	10	3083	0.0032	56	8130	0.0068	ctrl	0.0261
1197	RTKN2_-_-_0	19	3074	0.0061	25	8161	0.0031	case	0.0264
1198	UBR2_-_-_2	29	3064	0.0094	120	8066	0.0147	ctrl	0.0267
1199	SAC3D1_-_-_0	3	3090	0.00097	29	8157	0.0035	ctrl	0.0267
1200	TRIM52_-_-_1	3	3090	0.00097	29	8157	0.0035	ctrl	0.0267
1201	ATP1B4_162204_162204_0	3	3090	0.00097	29	8157	0.0035	ctrl	0.0267
1202	KCNJ15_250289_250289_0	3	3090	0.00097	29	8157	0.0035	ctrl	0.0267
1203	MUC16_250582_250582_3	3	3090	0.00097	29	8157	0.0035	ctrl	0.0267
1204	PLEC_-_-_2	3	3090	0.00097	29	8157	0.0035	ctrl	0.0267
1205	LY86_238457_238457_0	3	3090	0.00097	29	8157	0.0035	ctrl	0.0267
1206	OR1B1_-_-_1	3	3090	0.00097	29	8157	0.0035	ctrl	0.0267
1207	SSC5D_214555_214555_4	3	3090	0.00097	29	8157	0.0035	ctrl	0.0267
1208	LMCD1_191489_191489_0	3	3090	0.00097	29	8157	0.0035	ctrl	0.0267
1209	MKS1_-_-_1	12	3081	0.0039	63	8123	0.0077	ctrl	0.0267
1210	SLC24A1_-_-_0	12	3081	0.0039	63	8123	0.0077	ctrl	0.0267
1211	C14orf37_-_-_0	17	3076	0.0055	21	8165	0.0026	case	0.0268
1212	GYG1_-_-_1	17	3076	0.0055	21	8165	0.0026	case	0.0268
1213	CKAP5_-_-_0	27	3066	0.0087	40	8146	0.0049	case	0.0269
1214	LAIR1_-_-_0	9	3084	0.0029	8	8178	0.000977	case	0.027
1215	ABCA6_-_-_0	9	3084	0.0029	8	8178	0.000977	case	0.027
1216	IQGAP1_237981_237981_0	9	3084	0.0029	8	8178	0.000977	case	0.027
1217	ZNF112_-_-_2	9	3084	0.0029	8	8178	0.000977	case	0.027
1218	THBD_-_-_0	9	3084	0.0029	8	8178	0.000977	case	0.027
1219	C12orf40_259226_259226_0	9	3084	0.0029	8	8178	0.000977	case	0.027
1220	PDP1_-_-_0	9	3084	0.0029	8	8178	0.000977	case	0.027
1221	CELSR1_206637_206637_0	9	3084	0.0029	8	8178	0.000977	case	0.027
1222	SLC7A4_258173_258173_0	9	3084	0.0029	8	8178	0.000977	case	0.027
1223	CDC37L1_215010_215010_0	9	3084	0.0029	8	8178	0.000977	case	0.027
1224	NELL2_254326_254326_1	9	3084	0.0029	8	8178	0.000977	case	0.027
1225	ZNF181_-_-_1	9	3084	0.0029	8	8178	0.000977	case	0.027
1226	ABHD17A_-_-_1	9	3084	0.0029	8	8178	0.000977	case	0.027
1227	VPS39_255940_255940_0	9	3084	0.0029	8	8178	0.000977	case	0.027
1228	CACNB4_212976_212976_0	9	3084	0.0029	8	8178	0.000977	case	0.027
1229	PCDHGA8_203892_203892_0	9	3084	0.0029	8	8178	0.000977	case	0.027
1230	COL12A1_238759_238759_2	9	3084	0.0029	8	8178	0.000977	case	0.027
1231	RGS11_128520_128520_0	9	3084	0.0029	8	8178	0.000977	case	0.027
1232	IKBKB_-_-_1	9	3084	0.0029	8	8178	0.000977	case	0.027
1233	CXorf30_-_-_0	9	3084	0.0029	8	8178	0.000977	case	0.027
1234	SLC8A3_-_-_3	9	3084	0.0029	8	8178	0.000977	case	0.027
1235	DDX31_258212_258212_0	9	3084	0.0029	8	8178	0.000977	case	0.027
1236	SDK2_238020_238020_4	9	3084	0.0029	8	8178	0.000977	case	0.027
1237	LRIT1_-_-_1	9	3084	0.0029	8	8178	0.000977	case	0.027
1238	CYP4B1_249556_249556_0	21	3072	0.0068	94	8092	0.0115	ctrl	0.0271
1239	CYB5R2_99780_99780_0	14	3079	0.0045	71	8115	0.0087	ctrl	0.0272
1240	TTLL9_251749_251749_0	14	3079	0.0045	71	8115	0.0087	ctrl	0.0272
1241	CUX2_-_-_4	7	3086	0.0023	44	8142	0.0054	ctrl	0.0273
1242	EDN1_-_-_2	7	3086	0.0023	44	8142	0.0054	ctrl	0.0273
1243	COL6A2_238757_238757_1	7	3086	0.0023	44	8142	0.0054	ctrl	0.0273
1244	OR4C15_258124_258124_0	7	3086	0.0023	44	8142	0.0054	ctrl	0.0273
1245	PCED1B_238880_238880_0	7	3086	0.0023	44	8142	0.0054	ctrl	0.0273
1246	WRAP53_-_-_0	7	3086	0.0023	44	8142	0.0054	ctrl	0.0273
1247	SHISA6_-_-_1	7	3086	0.0023	44	8142	0.0054	ctrl	0.0273
1248	RRP9_238121_238121_0	7	3086	0.0023	44	8142	0.0054	ctrl	0.0273
1249	MAK_-_-_0	30	3063	0.0097	46	8140	0.0056	case	0.0273
1250	GPR137_-_-_0	30	3063	0.0097	46	8140	0.0056	case	0.0273
1251	CUBN_238001_238001_15	24	3069	0.0078	35	8151	0.0043	case	0.0276
1252	SLC26A10_250221_250221_0	7	3086	0.0023	45	8141	0.0055	ctrl	0.0278
1253	SLC4A1_254292_254292_0	7	3086	0.0023	45	8141	0.0055	ctrl	0.0278
1254	PTK6_133248_133248_0	7	3086	0.0023	45	8141	0.0055	ctrl	0.0278
1255	PARP12_128922_128922_1	13	3080	0.0042	14	8172	0.0017	case	0.0278
1256	KRTAP24-1_-_-_0	13	3080	0.0042	14	8172	0.0017	case	0.0278
1257	OR10G8_258124_258124_0	13	3080	0.0042	14	8172	0.0017	case	0.0278
1258	ERGIC3_254553_254553_0	13	3080	0.0042	14	8172	0.0017	case	0.0278
1259	KLHL33_-_-_0	13	3080	0.0042	14	8172	0.0017	case	0.0278
1260	TDRD7_-_-_4	13	3080	0.0042	14	8172	0.0017	case	0.0278
1261	TXNRD2_-_-_3	13	3080	0.0042	14	8172	0.0017	case	0.0278
1262	PLEKHG4B_241396_241396_0	13	3080	0.0042	14	8172	0.0017	case	0.0278
1263	KMT2E_-_-_2	43	3050	0.0139	165	8021	0.0202	ctrl	0.0279
1264	WBSCR17_-_-_0	11	3082	0.0036	11	8175	0.0013	case	0.0281
1265	MPG_-_-_0	11	3082	0.0036	11	8175	0.0013	case	0.0281
1266	TMEM86A_254534_254534_0	11	3082	0.0036	11	8175	0.0013	case	0.0281
1267	PDCD6IP_185748_185748_0	11	3082	0.0036	11	8175	0.0013	case	0.0281
1268	TGM6_214673_214673_0	11	3082	0.0036	11	8175	0.0013	case	0.0281
1269	PDE8B_-_-_2	11	3082	0.0036	11	8175	0.0013	case	0.0281
1270	ARAP3_250600_250600_0	11	3082	0.0036	11	8175	0.0013	case	0.0281
1271	IQCJ-SCHIP1_-_-_0	11	3082	0.0036	11	8175	0.0013	case	0.0281
1272	SUPT3H_190265_190265_0	11	3082	0.0036	11	8175	0.0013	case	0.0281
1273	ZNF44_-_-_7	11	3082	0.0036	11	8175	0.0013	case	0.0281
1274	DDX60_-_-_2	19	3074	0.0061	87	8099	0.0106	ctrl	0.0283
1275	TAS1R1_107358_107358_0	19	3074	0.0061	87	8099	0.0106	ctrl	0.0283
1276	WDR87_-_-_0	73	3020	0.0236	257	7929	0.0314	ctrl	0.0284
1277	EFCAB4B_-_-_1	27	3066	0.0087	41	8145	0.005	case	0.0285
1278	YIF1A_252222_252222_0	27	3066	0.0087	41	8145	0.005	case	0.0285
1279	SAFB2_-_-_0	30	3063	0.0097	47	8139	0.0057	case	0.0287
1280	GDPD5_176550_176550_0	17	3076	0.0055	80	8106	0.0098	ctrl	0.0294
1281	SEMA3F_200515_200515_0	9	3084	0.0029	51	8135	0.0062	ctrl	0.0295
1282	ENOX1_-_-_0	22	3071	0.0071	31	8155	0.0038	case	0.0295
1283	C17orf74_-_-_0	22	3071	0.0071	31	8155	0.0038	case	0.0295
1284	TRAK1_-_-_3	8	3085	0.0026	6	8180	0.000733	case	0.0295
1285	RARRES3_-_-_1	8	3085	0.0026	6	8180	0.000733	case	0.0295
1286	GPSM2_251145_251145_0	8	3085	0.0026	6	8180	0.000733	case	0.0295
1287	PLD3_-_-_1	8	3085	0.0026	6	8180	0.000733	case	0.0295
1288	ADM5_-_-_0	8	3085	0.0026	6	8180	0.000733	case	0.0295
1289	SLC7A14_-_-_0	8	3085	0.0026	6	8180	0.000733	case	0.0295
1290	LAMA1_-_-_6	8	3085	0.0026	6	8180	0.000733	case	0.0295
1291	LSM14B_255415_255415_0	8	3085	0.0026	6	8180	0.000733	case	0.0295
1292	CLCN7_-_-_2	8	3085	0.0026	6	8180	0.000733	case	0.0295
1293	MICAL2_188823_188823_0	8	3085	0.0026	6	8180	0.000733	case	0.0295
1294	SPATA2_-_-_0	8	3085	0.0026	6	8180	0.000733	case	0.0295
1295	MYBPH_238020_238020_0	8	3085	0.0026	6	8180	0.000733	case	0.0295
1296	MPZ_256067_256067_0	8	3085	0.0026	6	8180	0.000733	case	0.0295
1297	ZNF681_257789_257789_5	8	3085	0.0026	6	8180	0.000733	case	0.0295
1298	SEC14L1_250030_250030_0	8	3085	0.0026	6	8180	0.000733	case	0.0295
1299	RAB5A_206653_206653_0	8	3085	0.0026	6	8180	0.000733	case	0.0295
1300	DYDC1_-_-_0	8	3085	0.0026	6	8180	0.000733	case	0.0295
1301	UBASH3B_-_-_1	8	3085	0.0026	6	8180	0.000733	case	0.0295
1302	EPHA2_-_-_1	8	3085	0.0026	6	8180	0.000733	case	0.0295
1303	OBSCN_143165_143165_13	8	3085	0.0026	6	8180	0.000733	case	0.0295
1304	GTF2B_254699_254699_0	8	3085	0.0026	6	8180	0.000733	case	0.0295
1305	ABCC9_-_-_4	8	3085	0.0026	6	8180	0.000733	case	0.0295
1306	AGAP1_241281_241281_0	8	3085	0.0026	6	8180	0.000733	case	0.0295
1307	JMJD7_257933_257933_0	8	3085	0.0026	6	8180	0.000733	case	0.0295
1308	SLC45A1_-_-_0	37	3056	0.012	146	8040	0.0178	ctrl	0.0295
1309	SLC22A16_-_-_2	15	3078	0.0048	18	8168	0.0022	case	0.0296
1310	RBKS_233751_233751_0	9	3084	0.0029	52	8134	0.0064	ctrl	0.0298
1311	SLC39A5_-_-_0	19	3074	0.0061	26	8160	0.0032	case	0.0299
1312	ARHGEF19_241256_241256_0	19	3074	0.0061	26	8160	0.0032	case	0.0299
1313	CERS4_214789_214789_0	37	3056	0.012	61	8125	0.0075	case	0.03
1314	LPPR3_239479_239479_0	17	3076	0.0055	22	8164	0.0027	case	0.0301
1315	UGT2B17_99960_99960_0	17	3076	0.0055	22	8164	0.0027	case	0.0301
1316	NEURL4_240467_240467_0	17	3076	0.0055	22	8164	0.0027	case	0.0301
1317	ABCC8_-_-_4	17	3076	0.0055	22	8164	0.0027	case	0.0301
1318	HMMR_-_-_0	15	3078	0.0048	73	8113	0.0089	ctrl	0.0303
1319	MYH4_-_-_0	41	3052	0.0133	158	8028	0.0193	ctrl	0.0303
1320	CYB561D2_176491_176491_0	6	3087	0.0019	40	8146	0.0049	ctrl	0.0303
1321	FAM134B_-_-_0	6	3087	0.0019	40	8146	0.0049	ctrl	0.0303
1322	PLIN4_-_-_1	6	3087	0.0019	40	8146	0.0049	ctrl	0.0303
1323	ZNF30_-_-_1	6	3087	0.0019	40	8146	0.0049	ctrl	0.0303
1324	HERC1_-_-_8	25	3068	0.0081	107	8079	0.0131	ctrl	0.0304
1325	DAGLB_238287_238287_0	11	3082	0.0036	58	8128	0.0071	ctrl	0.0305
1326	RRP12_254639_254639_0	11	3082	0.0036	58	8128	0.0071	ctrl	0.0305
1327	SERPINB4_239014_239014_0	11	3082	0.0036	59	8127	0.0072	ctrl	0.0306
1328	KIF14_-_-_3	13	3080	0.0042	65	8121	0.0079	ctrl	0.0307
1329	SLCO1A2_-_-_1	13	3080	0.0042	65	8121	0.0079	ctrl	0.0307
1330	HABP2_-_-_0	6	3087	0.0019	4	8182	0.000489	case	0.0309
1331	TBKBP1_-_-_1	6	3087	0.0019	4	8182	0.000489	case	0.0309
1332	LRTOMT_-_-_0	6	3087	0.0019	4	8182	0.000489	case	0.0309
1333	CLIP3_250520_250520_0	6	3087	0.0019	4	8182	0.000489	case	0.0309
1334	EXPH5_251218_251218_0	6	3087	0.0019	4	8182	0.000489	case	0.0309
1335	MPP5_238492_238492_0	6	3087	0.0019	4	8182	0.000489	case	0.0309
1336	ZNF415_201743_201743_0	6	3087	0.0019	4	8182	0.000489	case	0.0309
1337	ADAM11_250606_250606_0	6	3087	0.0019	4	8182	0.000489	case	0.0309
1338	FAM110B_-_-_1	6	3087	0.0019	4	8182	0.000489	case	0.0309
1339	NME5_253069_253069_0	6	3087	0.0019	4	8182	0.000489	case	0.0309
1340	CDH18_206637_206637_4	6	3087	0.0019	4	8182	0.000489	case	0.0309
1341	MFAP4_238040_238040_0	6	3087	0.0019	4	8182	0.000489	case	0.0309
1342	GRM7_254290_254290_0	6	3087	0.0019	4	8182	0.000489	case	0.0309
1343	DLG2_256082_256082_0	6	3087	0.0019	4	8182	0.000489	case	0.0309
1344	PKN3_212022_212022_0	6	3087	0.0019	4	8182	0.000489	case	0.0309
1345	UNC5B_214559_214559_0	6	3087	0.0019	4	8182	0.000489	case	0.0309
1346	FASTKD5_254759_254759_0	6	3087	0.0019	4	8182	0.000489	case	0.0309
1347	PLS1_237981_237981_0	6	3087	0.0019	4	8182	0.000489	case	0.0309
1348	TUSC5_252638_252638_0	6	3087	0.0019	4	8182	0.000489	case	0.0309
1349	C19orf35_-_-_0	6	3087	0.0019	4	8182	0.000489	case	0.0309
1350	SNTG1_238492_238492_0	6	3087	0.0019	4	8182	0.000489	case	0.0309
1351	MMAB_-_-_0	6	3087	0.0019	4	8182	0.000489	case	0.0309
1352	S100A11_-_-_0	6	3087	0.0019	4	8182	0.000489	case	0.0309
1353	PPCDC_-_-_0	6	3087	0.0019	4	8182	0.000489	case	0.0309
1354	PPP2R1A_-_-_0	6	3087	0.0019	4	8182	0.000489	case	0.0309
1355	WWTR1_-_-_1	6	3087	0.0019	4	8182	0.000489	case	0.0309
1356	ZNF596_257789_257789_3	6	3087	0.0019	4	8182	0.000489	case	0.0309
1357	SPAG6_-_-_3	6	3087	0.0019	4	8182	0.000489	case	0.0309
1358	KLHDC4_-_-_4	6	3087	0.0019	4	8182	0.000489	case	0.0309
1359	KDM5B_-_-_5	6	3087	0.0019	4	8182	0.000489	case	0.0309
1360	SLC38A2_-_-_2	6	3087	0.0019	4	8182	0.000489	case	0.0309
1361	C1orf110_-_-_0	6	3087	0.0019	4	8182	0.000489	case	0.0309
1362	GALNTL6_238092_238092_0	6	3087	0.0019	4	8182	0.000489	case	0.0309
1363	NFKB2_238125_238125_0	6	3087	0.0019	4	8182	0.000489	case	0.0309
1364	UBXN10_-_-_1	6	3087	0.0019	4	8182	0.000489	case	0.0309
1365	CIZ1_-_-_1	6	3087	0.0019	4	8182	0.000489	case	0.0309
1366	CIZ1_-_-_0	6	3087	0.0019	4	8182	0.000489	case	0.0309
1367	MFSD6_119392_119392_0	6	3087	0.0019	4	8182	0.000489	case	0.0309
1368	STAT1_-_-_1	6	3087	0.0019	4	8182	0.000489	case	0.0309
1369	KCNE2_-_-_1	6	3087	0.0019	4	8182	0.000489	case	0.0309
1370	ZNF75A_-_-_1	6	3087	0.0019	4	8182	0.000489	case	0.0309
1371	ZNF358_-_-_0	6	3087	0.0019	4	8182	0.000489	case	0.0309
1372	RGS14_-_-_4	6	3087	0.0019	4	8182	0.000489	case	0.0309
1373	POC1A_-_-_0	6	3087	0.0019	4	8182	0.000489	case	0.0309
1374	ADAM22_249673_249673_0	6	3087	0.0019	4	8182	0.000489	case	0.0309
1375	CRB2_238011_238011_0	6	3087	0.0019	4	8182	0.000489	case	0.0309
1376	HERC2_249843_249843_3	6	3087	0.0019	4	8182	0.000489	case	0.0309
1377	ZNF431_-_-_9	6	3087	0.0019	4	8182	0.000489	case	0.0309
1378	VANGL2_-_-_0	6	3087	0.0019	4	8182	0.000489	case	0.0309
1379	GNL1_-_-_0	6	3087	0.0019	4	8182	0.000489	case	0.0309
1380	TRIM45_-_-_0	6	3087	0.0019	4	8182	0.000489	case	0.0309
1381	ZNF302_214630_214630_0	6	3087	0.0019	4	8182	0.000489	case	0.0309
1382	LAMA5_227603_227603_0	34	3059	0.011	55	8131	0.0067	case	0.0309
1383	PRCP_253262_253262_0	37	3056	0.012	62	8124	0.0076	case	0.0311
1384	CREB3L3_-_-_1	20	3073	0.0065	27	8159	0.0033	case	0.0315
1385	POLN_176475_176475_0	23	3070	0.0074	99	8087	0.0121	ctrl	0.0322
1386	PSMD9_-_-_0	22	3071	0.0071	32	8154	0.0039	case	0.0324
1387	XKR8_255579_255579_0	22	3071	0.0071	32	8154	0.0039	case	0.0324
1388	CD300LF_-_-_1	13	3080	0.0042	15	8171	0.0018	case	0.0325
1389	LGALS2_238025_238025_0	13	3080	0.0042	15	8171	0.0018	case	0.0325
1390	RNPS1_-_-_1	13	3080	0.0042	15	8171	0.0018	case	0.0325
1391	CDKN1A_251173_251173_0	13	3080	0.0042	15	8171	0.0018	case	0.0325
1392	PON1_-_-_1	13	3080	0.0042	15	8171	0.0018	case	0.0325
1393	C6orf211_250982_250982_0	13	3080	0.0042	15	8171	0.0018	case	0.0325
1394	INTS7_-_-_0	18	3075	0.0058	82	8104	0.01	ctrl	0.0326
1395	PLEKHA4_-_-_0	26	3067	0.0084	109	8077	0.0133	ctrl	0.0326
1396	KRT75_-_-_0	18	3075	0.0058	83	8103	0.0101	ctrl	0.0327
1397	TCTE1_238064_238064_0	18	3075	0.0058	83	8103	0.0101	ctrl	0.0327
1398	TAS2R42_253139_253139_0	5	3088	0.0016	35	8151	0.0043	ctrl	0.0331
1399	FAT1_206637_206637_27	5	3088	0.0016	35	8151	0.0043	ctrl	0.0331
1400	OSBPL11_250466_250466_0	5	3088	0.0016	35	8151	0.0043	ctrl	0.0331
1401	TFR2_-_-_4	5	3088	0.0016	35	8151	0.0043	ctrl	0.0331
1402	ADAM30_239797_239797_0	5	3088	0.0016	35	8151	0.0043	ctrl	0.0331
1403	CYB5R1_99780_99780_0	5	3088	0.0016	35	8151	0.0043	ctrl	0.0331
1404	LAMA3_214532_214532_0	8	3085	0.0026	47	8139	0.0057	ctrl	0.0332
1405	MICAL2_-_-_1	8	3085	0.0026	47	8139	0.0057	ctrl	0.0332
1406	OPN1SW_-_-_0	25	3068	0.0081	38	8148	0.0046	case	0.0335
1407	KMT2D_-_-_5	5	3088	0.0016	36	8150	0.0044	ctrl	0.0336
1408	BEST3_-_-_0	5	3088	0.0016	36	8150	0.0044	ctrl	0.0336
1409	FAT1_206637_206637_10	5	3088	0.0016	36	8150	0.0044	ctrl	0.0336
1410	GIT1_214518_214518_0	5	3088	0.0016	36	8150	0.0044	ctrl	0.0336
1411	ALKBH3_257851_257851_0	5	3088	0.0016	36	8150	0.0044	ctrl	0.0336
1412	EXO5_255574_255574_0	5	3088	0.0016	36	8150	0.0044	ctrl	0.0336
1413	SCN1A_-_-_3	5	3088	0.0016	36	8150	0.0044	ctrl	0.0336
1414	RBM43_-_-_0	5	3088	0.0016	36	8150	0.0044	ctrl	0.0336
1415	ARHGEF18_238091_238091_0	28	3065	0.0091	44	8142	0.0054	case	0.0337
1416	RNF103_-_-_1	16	3077	0.0052	75	8111	0.0092	ctrl	0.0338
1417	RIF1_-_-_1	60	3033	0.0194	215	7971	0.0263	ctrl	0.034
1418	ZBTB4_-_-_0	21	3072	0.0068	92	8094	0.0112	ctrl	0.034
1419	SLC38A7_250658_250658_0	23	3070	0.0074	33	8153	0.004	case	0.0341
1420	AEBP1_-_-_0	23	3070	0.0074	33	8153	0.004	case	0.0341
1421	BCL6_-_-_4	20	3073	0.0065	28	8158	0.0034	case	0.0341
1422	SERPING1_239005_239005_0	15	3078	0.0048	19	8167	0.0023	case	0.0344
1423	NEK1_173758_173758_0	15	3078	0.0048	19	8167	0.0023	case	0.0344
1424	ZNF404_-_-_3	15	3078	0.0048	19	8167	0.0023	case	0.0344
1425	SRCAP_-_-_1	15	3078	0.0048	19	8167	0.0023	case	0.0344
1426	SEC24C_238756_238756_0	15	3078	0.0048	19	8167	0.0023	case	0.0344
1427	PRDM6_-_-_1	15	3078	0.0048	19	8167	0.0023	case	0.0344
1428	KSR1_-_-_1	15	3078	0.0048	19	8167	0.0023	case	0.0344
1429	SLCO1B7_-_-_1	15	3078	0.0048	19	8167	0.0023	case	0.0344
1430	DDX50_-_-_0	15	3078	0.0048	19	8167	0.0023	case	0.0344
1431	PRL_198438_198438_0	15	3078	0.0048	19	8167	0.0023	case	0.0344
1432	CD300LF_143193_143193_0	15	3078	0.0048	19	8167	0.0023	case	0.0344
1433	DTNA_-_-_4	15	3078	0.0048	19	8167	0.0023	case	0.0344
1434	FAM214B_-_-_2	10	3083	0.0032	54	8132	0.0066	ctrl	0.0347
1435	LRRC43_-_-_0	49	3044	0.0158	89	8097	0.0109	case	0.0348
1436	ATF7IP_-_-_0	49	3044	0.0158	89	8097	0.0109	case	0.0348
1437	ANO5_252663_252663_0	12	3081	0.0039	61	8125	0.0075	ctrl	0.035
1438	SPZ1_-_-_0	12	3081	0.0039	61	8125	0.0075	ctrl	0.035
1439	CDHR5_-_-_0	12	3081	0.0039	61	8125	0.0075	ctrl	0.035
1440	DOCK10_176079_176079_0	1	3092	0.000323	17	8169	0.0021	ctrl	0.0351
1441	MYO5B_-_-_0	1	3092	0.000323	17	8169	0.0021	ctrl	0.0351
1442	ANKFY1_-_-_3	1	3092	0.000323	17	8169	0.0021	ctrl	0.0351
1443	DPY19L3_-_-_1	1	3092	0.000323	17	8169	0.0021	ctrl	0.0351
1444	KANK4_-_-_0	1	3092	0.000323	17	8169	0.0021	ctrl	0.0351
1445	DAG1_206636_206636_0	1	3092	0.000323	17	8169	0.0021	ctrl	0.0351
1446	ZNF584_-_-_1	1	3092	0.000323	17	8169	0.0021	ctrl	0.0351
1447	C3orf62_-_-_0	1	3092	0.000323	17	8169	0.0021	ctrl	0.0351
1448	GJA10_151113_151113_0	1	3092	0.000323	17	8169	0.0021	ctrl	0.0351
1449	TMEM169_259189_259189_0	1	3092	0.000323	17	8169	0.0021	ctrl	0.0351
1450	UMODL1_-_-_8	1	3092	0.000323	17	8169	0.0021	ctrl	0.0351
1451	VPS29_163637_163637_0	1	3092	0.000323	17	8169	0.0021	ctrl	0.0351
1452	IL13_197564_197564_0	1	3092	0.000323	17	8169	0.0021	ctrl	0.0351
1453	TRMT13_-_-_2	1	3092	0.000323	17	8169	0.0021	ctrl	0.0351
1454	CNTNAP1_-_-_6	1	3092	0.000323	17	8169	0.0021	ctrl	0.0351
1455	ANXA3_249668_249668_1	1	3092	0.000323	17	8169	0.0021	ctrl	0.0351
1456	PAPSS1_250721_250721_0	1	3092	0.000323	17	8169	0.0021	ctrl	0.0351
1457	PDZD9_-_-_0	1	3092	0.000323	17	8169	0.0021	ctrl	0.0351
1458	MAST4_173700_173700_0	1	3092	0.000323	17	8169	0.0021	ctrl	0.0351
1459	FUT11_-_-_1	1	3092	0.000323	17	8169	0.0021	ctrl	0.0351
1460	TNNT2_-_-_2	1	3092	0.000323	17	8169	0.0021	ctrl	0.0351
1461	GBF1_-_-_1	1	3092	0.000323	17	8169	0.0021	ctrl	0.0351
1462	NELL1_-_-_2	1	3092	0.000323	17	8169	0.0021	ctrl	0.0351
1463	RPL6_240520_240520_0	1	3092	0.000323	17	8169	0.0021	ctrl	0.0351
1464	ADAMTS1_214743_214743_0	1	3092	0.000323	17	8169	0.0021	ctrl	0.0351
1465	CD93_258808_258808_0	1	3092	0.000323	17	8169	0.0021	ctrl	0.0351
1466	NFKBIB_-_-_1	1	3092	0.000323	17	8169	0.0021	ctrl	0.0351
1467	LYPD5_249515_249515_0	1	3092	0.000323	17	8169	0.0021	ctrl	0.0351
1468	ABCC8_-_-_3	1	3092	0.000323	17	8169	0.0021	ctrl	0.0351
1469	VIL1_200448_200448_0	1	3092	0.000323	17	8169	0.0021	ctrl	0.0351
1470	VPS37C_-_-_0	1	3092	0.000323	17	8169	0.0021	ctrl	0.0351
1471	POM121L2_-_-_1	1	3092	0.000323	17	8169	0.0021	ctrl	0.0351
1472	ITCH_-_-_1	1	3092	0.000323	17	8169	0.0021	ctrl	0.0351
1473	ASNSD1_239735_239735_0	1	3092	0.000323	17	8169	0.0021	ctrl	0.0351
1474	CENPT_-_-_2	1	3092	0.000323	17	8169	0.0021	ctrl	0.0351
1475	YY2_-_-_0	1	3092	0.000323	17	8169	0.0021	ctrl	0.0351
1476	DOCK8_-_-_0	1	3092	0.000323	17	8169	0.0021	ctrl	0.0351
1477	MARK1_173660_173660_0	1	3092	0.000323	17	8169	0.0021	ctrl	0.0351
1478	PLEKHM2_251516_251516_0	1	3092	0.000323	17	8169	0.0021	ctrl	0.0351
1479	CHM_250280_250280_0	1	3092	0.000323	17	8169	0.0021	ctrl	0.0351
1480	ZNF569_-_-_12	1	3092	0.000323	17	8169	0.0021	ctrl	0.0351
1481	RBCK1_-_-_2	1	3092	0.000323	17	8169	0.0021	ctrl	0.0351
1482	PON2_-_-_1	1	3092	0.000323	17	8169	0.0021	ctrl	0.0351
1483	KCNJ6_-_-_1	11	3082	0.0036	12	8174	0.0015	case	0.0353
1484	DCHS1_206637_206637_4	11	3082	0.0036	12	8174	0.0015	case	0.0353
1485	DAXX_240523_240523_0	11	3082	0.0036	12	8174	0.0015	case	0.0353
1486	DMD_238103_238103_9	11	3082	0.0036	12	8174	0.0015	case	0.0353
1487	ELTD1_256791_256791_0	11	3082	0.0036	12	8174	0.0015	case	0.0353
1488	CTSK_249598_249598_0	11	3082	0.0036	12	8174	0.0015	case	0.0353
1489	PLEKHM1_241475_241475_0	11	3082	0.0036	12	8174	0.0015	case	0.0353
1490	PLD1_197302_197302_0	11	3082	0.0036	12	8174	0.0015	case	0.0353
1491	ICA1L_153345_153345_0	11	3082	0.0036	12	8174	0.0015	case	0.0353
1492	SLC12A3_254780_254780_0	11	3082	0.0036	12	8174	0.0015	case	0.0353
1493	ZNF668_-_-_2	11	3082	0.0036	12	8174	0.0015	case	0.0353
1494	PPP5C_163660_163660_0	11	3082	0.0036	12	8174	0.0015	case	0.0353
1495	NEO1_143199_143199_3	11	3082	0.0036	12	8174	0.0015	case	0.0353
1496	MAP3K7_173624_173624_0	11	3082	0.0036	12	8174	0.0015	case	0.0353
1497	NOX3_99783_99783_0	10	3083	0.0032	55	8131	0.0067	ctrl	0.0353
1498	CSNK2A3_173733_173733_0	10	3083	0.0032	55	8131	0.0067	ctrl	0.0353
1499	CXCR5_-_-_0	10	3083	0.0032	55	8131	0.0067	ctrl	0.0353
1500	FBXO39_-_-_1	10	3083	0.0032	55	8131	0.0067	ctrl	0.0353
1501	CCDC88C_-_-_0	81	3012	0.0262	279	7907	0.0341	ctrl	0.0355
1502	GNPTG_-_-_1	12	3081	0.0039	62	8124	0.0076	ctrl	0.0355
1503	TTN_143224_143224_3	4	3089	0.0013	31	8155	0.0038	ctrl	0.0357
1504	RNASE2_128403_128403_0	4	3089	0.0013	31	8155	0.0038	ctrl	0.0357
1505	BEX2_191022_191022_0	4	3089	0.0013	31	8155	0.0038	ctrl	0.0357
1506	NOB1_-_-_0	4	3089	0.0013	31	8155	0.0038	ctrl	0.0357
1507	RARA_132735_132735_0	4	3089	0.0013	31	8155	0.0038	ctrl	0.0357
1508	ABHD12B_-_-_1	4	3089	0.0013	31	8155	0.0038	ctrl	0.0357
1509	PLEKHS1_241535_241535_0	4	3089	0.0013	31	8155	0.0038	ctrl	0.0357
1510	OR1C1_258124_258124_0	4	3089	0.0013	31	8155	0.0038	ctrl	0.0357
1511	RNASEL_238125_238125_1	4	3089	0.0013	31	8155	0.0038	ctrl	0.0357
1512	PIGN_250780_250780_0	4	3089	0.0013	31	8155	0.0038	ctrl	0.0357
1513	METAP1D_-_-_0	4	3089	0.0013	31	8155	0.0038	ctrl	0.0357
1514	ARRDC1_251513_251513_0	4	3089	0.0013	31	8155	0.0038	ctrl	0.0357
1515	CRTC2_-_-_1	18	3075	0.0058	24	8162	0.0029	case	0.0358
1516	CTH_250326_250326_0	18	3075	0.0058	24	8162	0.0029	case	0.0358
1517	RNASE1_128403_128403_0	18	3075	0.0058	24	8162	0.0029	case	0.0358
1518	ZNF496_-_-_2	18	3075	0.0058	24	8162	0.0029	case	0.0358
1519	CAPN2_250029_250029_0	18	3075	0.0058	24	8162	0.0029	case	0.0358
1520	TNFRSF14_-_-_1	1	3092	0.000323	18	8168	0.0022	ctrl	0.0358
1521	NAP1L4_-_-_1	1	3092	0.000323	18	8168	0.0022	ctrl	0.0358
1522	HIPK3_173734_173734_0	1	3092	0.000323	18	8168	0.0022	ctrl	0.0358
1523	KIAA1199_257660_257660_0	1	3092	0.000323	18	8168	0.0022	ctrl	0.0358
1524	CACNA2D1_-_-_0	1	3092	0.000323	18	8168	0.0022	ctrl	0.0358
1525	CENPQ_257497_257497_0	1	3092	0.000323	18	8168	0.0022	ctrl	0.0358
1526	APOL1_-_-_1	1	3092	0.000323	18	8168	0.0022	ctrl	0.0358
1527	FAM19A4_-_-_1	1	3092	0.000323	18	8168	0.0022	ctrl	0.0358
1528	MASP2_238001_238001_0	1	3092	0.000323	18	8168	0.0022	ctrl	0.0358
1529	MARK4_173755_173755_0	1	3092	0.000323	18	8168	0.0022	ctrl	0.0358
1530	IRX2_-_-_1	1	3092	0.000323	18	8168	0.0022	ctrl	0.0358
1531	NR2E1_132748_132748_0	1	3092	0.000323	18	8168	0.0022	ctrl	0.0358
1532	CNBD2_237999_237999_0	1	3092	0.000323	18	8168	0.0022	ctrl	0.0358
1533	HEXIM2_259446_259446_0	1	3092	0.000323	18	8168	0.0022	ctrl	0.0358
1534	CASP5_-_-_2	1	3092	0.000323	18	8168	0.0022	ctrl	0.0358
1535	AOX1_250245_250245_0	1	3092	0.000323	18	8168	0.0022	ctrl	0.0358
1536	RRM2_215272_215272_0	1	3092	0.000323	18	8168	0.0022	ctrl	0.0358
1537	GPSM2_-_-_2	1	3092	0.000323	18	8168	0.0022	ctrl	0.0358
1538	TKTL2_251527_251527_0	1	3092	0.000323	18	8168	0.0022	ctrl	0.0358
1539	ITSN1_-_-_4	1	3092	0.000323	18	8168	0.0022	ctrl	0.0358
1540	SDHB_257488_257488_0	1	3092	0.000323	18	8168	0.0022	ctrl	0.0358
1541	OR5K2_258124_258124_0	1	3092	0.000323	18	8168	0.0022	ctrl	0.0358
1542	THPO_189705_189705_0	1	3092	0.000323	18	8168	0.0022	ctrl	0.0358
1543	VARS2_254693_254693_0	1	3092	0.000323	18	8168	0.0022	ctrl	0.0358
1544	DDX49_234437_234437_0	1	3092	0.000323	18	8168	0.0022	ctrl	0.0358
1545	CPNE7_176013_176013_0	1	3092	0.000323	18	8168	0.0022	ctrl	0.0358
1546	HELLS_-_-_2	1	3092	0.000323	18	8168	0.0022	ctrl	0.0358
1547	UTP20_254272_254272_0	1	3092	0.000323	18	8168	0.0022	ctrl	0.0358
1548	SERPINA6_239011_239011_0	23	3070	0.0074	34	8152	0.0042	case	0.0362
1549	GLB1L2_-_-_1	23	3070	0.0074	34	8152	0.0042	case	0.0362
1550	MYO1G_238674_238674_0	54	3039	0.0175	100	8086	0.0122	case	0.0363
1551	NPBWR2_-_-_0	35	3058	0.0113	59	8127	0.0072	case	0.0365
1552	SEC31B_-_-_0	22	3071	0.0071	95	8091	0.0116	ctrl	0.037
1553	SLC45A3_-_-_0	22	3071	0.0071	95	8091	0.0116	ctrl	0.037
1554	GRB7_176382_176382_0	26	3067	0.0084	40	8146	0.0049	case	0.037
1555	MMP2_238046_238046_0	26	3067	0.0084	40	8146	0.0049	case	0.037
1556	CYP4F3_249556_249556_0	31	3062	0.01	124	8062	0.0151	ctrl	0.0371
1557	LIG3_252736_252736_0	16	3077	0.0052	20	8166	0.0024	case	0.0372
1558	PCDHA2_-_-_6	16	3077	0.0052	20	8166	0.0024	case	0.0372
1559	AMFR_-_-_0	16	3077	0.0052	20	8166	0.0024	case	0.0372
1560	OR51E2_258124_258124_0	16	3077	0.0052	20	8166	0.0024	case	0.0372
1561	SYNRG_-_-_1	16	3077	0.0052	20	8166	0.0024	case	0.0372
1562	UBR3_-_-_1	22	3071	0.0071	96	8090	0.0117	ctrl	0.0374
1563	RALGAPB_-_-_0	46	3047	0.0149	83	8103	0.0101	case	0.0374
1564	HELZ2_-_-_3	7	3086	0.0023	42	8144	0.0051	ctrl	0.0374
1565	GMIP_-_-_2	7	3086	0.0023	42	8144	0.0051	ctrl	0.0374
1566	PPAP2C_-_-_1	7	3086	0.0023	42	8144	0.0051	ctrl	0.0374
1567	AGXT_99744_99744_0	7	3086	0.0023	42	8144	0.0051	ctrl	0.0374
1568	MGAM_-_-_1	7	3086	0.0023	42	8144	0.0051	ctrl	0.0374
1569	NOD1_-_-_1	17	3076	0.0055	78	8108	0.0095	ctrl	0.0374
1570	SGOL2_-_-_0	25	3068	0.0081	105	8081	0.0128	ctrl	0.0375
1571	GRK6_173696_173696_0	7	3086	0.0023	43	8143	0.0053	ctrl	0.0376
1572	ANGEL2_197331_197331_0	7	3086	0.0023	43	8143	0.0053	ctrl	0.0376
1573	ACTL7B_240225_240225_0	7	3086	0.0023	43	8143	0.0053	ctrl	0.0376
1574	TSPAN32_-_-_0	3	3090	0.00097	26	8160	0.0032	ctrl	0.0377
1575	FGFR3_-_-_3	3	3090	0.00097	26	8160	0.0032	ctrl	0.0377
1576	FIG4_251261_251261_0	3	3090	0.00097	26	8160	0.0032	ctrl	0.0377
1577	ZNF486_-_-_1	3	3090	0.00097	26	8160	0.0032	ctrl	0.0377
1578	ARAP1_239850_239850_0	3	3090	0.00097	26	8160	0.0032	ctrl	0.0377
1579	FNDC5_-_-_0	3	3090	0.00097	26	8160	0.0032	ctrl	0.0377
1580	LARP1B_-_-_0	3	3090	0.00097	26	8160	0.0032	ctrl	0.0377
1581	LAMB3_249544_249544_4	3	3090	0.00097	26	8160	0.0032	ctrl	0.0377
1582	LHFPL1_255845_255845_0	3	3090	0.00097	26	8160	0.0032	ctrl	0.0377
1583	TJAP1_259584_259584_0	3	3090	0.00097	26	8160	0.0032	ctrl	0.0377
1584	PDGFRL_143219_143219_0	3	3090	0.00097	26	8160	0.0032	ctrl	0.0377
1585	MYL3_-_-_1	3	3090	0.00097	26	8160	0.0032	ctrl	0.0377
1586	TMEM63A_258219_258219_0	3	3090	0.00097	26	8160	0.0032	ctrl	0.0377
1587	OR1Q1_258124_258124_0	3	3090	0.00097	26	8160	0.0032	ctrl	0.0377
1588	ZC3H12B_-_-_1	3	3090	0.00097	26	8160	0.0032	ctrl	0.0377
1589	CDH13_206637_206637_2	3	3090	0.00097	26	8160	0.0032	ctrl	0.0377
1590	CLEC10A_153060_153060_0	3	3090	0.00097	26	8160	0.0032	ctrl	0.0377
1591	EPHX1_253733_253733_0	3	3090	0.00097	26	8160	0.0032	ctrl	0.0377
1592	MAGEB2_201804_201804_0	3	3090	0.00097	26	8160	0.0032	ctrl	0.0377
1593	FAM218A_-_-_0	3	3090	0.00097	26	8160	0.0032	ctrl	0.0377
1594	FAM135B_-_-_1	17	3076	0.0055	79	8107	0.0097	ctrl	0.0378
1595	PLCD1_241517_241517_0	2	3091	0.000647	22	8164	0.0027	ctrl	0.0379
1596	ESRRB_132744_132744_0	2	3091	0.000647	22	8164	0.0027	ctrl	0.0379
1597	PIWIL3_239211_239211_0	2	3091	0.000647	22	8164	0.0027	ctrl	0.0379
1598	RASGRP3_238087_238087_0	2	3091	0.000647	22	8164	0.0027	ctrl	0.0379
1599	C5_239637_239637_0	2	3091	0.000647	22	8164	0.0027	ctrl	0.0379
1600	UBA1_-_-_1	2	3091	0.000647	22	8164	0.0027	ctrl	0.0379
1601	PSTPIP1_212758_212758_0	2	3091	0.000647	22	8164	0.0027	ctrl	0.0379
1602	HTR1F_255910_255910_0	2	3091	0.000647	22	8164	0.0027	ctrl	0.0379
1603	ACN9_257591_257591_0	2	3091	0.000647	22	8164	0.0027	ctrl	0.0379
1604	COPRS_259472_259472_0	2	3091	0.000647	22	8164	0.0027	ctrl	0.0379
1605	BTBD8_-_-_1	2	3091	0.000647	22	8164	0.0027	ctrl	0.0379
1606	ARHGAP15_239868_239868_0	2	3091	0.000647	22	8164	0.0027	ctrl	0.0379
1607	LPO_-_-_1	2	3091	0.000647	22	8164	0.0027	ctrl	0.0379
1608	HNF4G_132729_132729_0	2	3091	0.000647	22	8164	0.0027	ctrl	0.0379
1609	GLIS3_-_-_1	47	3046	0.0152	84	8102	0.0103	case	0.038
1610	PARK7_-_-_1	8	3085	0.0026	7	8179	0.000855	case	0.038
1611	C1orf43_148805_148805_0	8	3085	0.0026	7	8179	0.000855	case	0.038
1612	SLC25A25_249634_249634_0	8	3085	0.0026	7	8179	0.000855	case	0.038
1613	KLF6_-_-_1	8	3085	0.0026	7	8179	0.000855	case	0.038
1614	KLHDC1_258125_258125_0	8	3085	0.0026	7	8179	0.000855	case	0.038
1615	IFI35_191721_191721_0	8	3085	0.0026	7	8179	0.000855	case	0.038
1616	SEC13_-_-_0	8	3085	0.0026	7	8179	0.000855	case	0.038
1617	CNKSR1_188910_188910_0	8	3085	0.0026	7	8179	0.000855	case	0.038
1618	PHLDB2_241268_241268_0	8	3085	0.0026	7	8179	0.000855	case	0.038
1619	UTS2B_-_-_0	8	3085	0.0026	7	8179	0.000855	case	0.038
1620	GSTM3_198318_198318_0	8	3085	0.0026	7	8179	0.000855	case	0.038
1621	CLK4_-_-_1	8	3085	0.0026	7	8179	0.000855	case	0.038
1622	SGCA_206636_206636_0	8	3085	0.0026	7	8179	0.000855	case	0.038
1623	ACAP2_-_-_1	8	3085	0.0026	7	8179	0.000855	case	0.038
1624	ZNF280D_206007_206007_0	8	3085	0.0026	7	8179	0.000855	case	0.038
1625	NACA2_-_-_0	8	3085	0.0026	7	8179	0.000855	case	0.038
1626	PARP10_-_-_2	8	3085	0.0026	7	8179	0.000855	case	0.038
1627	GALNT16_238092_238092_0	8	3085	0.0026	7	8179	0.000855	case	0.038
1628	PTPRC_-_-_4	8	3085	0.0026	7	8179	0.000855	case	0.038
1629	SEZ6L_-_-_8	8	3085	0.0026	7	8179	0.000855	case	0.038
1630	OBSCN_-_-_7	8	3085	0.0026	7	8179	0.000855	case	0.038
1631	ARFGEF2_257293_257293_0	8	3085	0.0026	7	8179	0.000855	case	0.038
1632	PAX5_257028_257028_0	8	3085	0.0026	7	8179	0.000855	case	0.038
1633	MTR_238381_238381_0	8	3085	0.0026	7	8179	0.000855	case	0.038
1634	EPHA2_-_-_5	8	3085	0.0026	7	8179	0.000855	case	0.038
1635	MARCH1_-_-_1	8	3085	0.0026	7	8179	0.000855	case	0.038
1636	TMEM244_-_-_0	8	3085	0.0026	7	8179	0.000855	case	0.038
1637	DNAH9_-_-_4	3	3090	0.00097	27	8159	0.0033	ctrl	0.0381
1638	DDX18_-_-_0	3	3090	0.00097	27	8159	0.0033	ctrl	0.0381
1639	PDZD3_238492_238492_3	3	3090	0.00097	27	8159	0.0033	ctrl	0.0381
1640	RSPO1_-_-_0	3	3090	0.00097	27	8159	0.0033	ctrl	0.0381
1641	NOL10_-_-_2	3	3090	0.00097	27	8159	0.0033	ctrl	0.0381
1642	ZDHHC23_250688_250688_0	3	3090	0.00097	27	8159	0.0033	ctrl	0.0381
1643	GPR142_251097_251097_0	3	3090	0.00097	27	8159	0.0033	ctrl	0.0381
1644	C8A_214671_214671_0	3	3090	0.00097	27	8159	0.0033	ctrl	0.0381
1645	CDH11_206637_206637_2	3	3090	0.00097	27	8159	0.0033	ctrl	0.0381
1646	PKDREJ_197639_197639_0	3	3090	0.00097	27	8159	0.0033	ctrl	0.0381
1647	ODF3B_-_-_0	3	3090	0.00097	27	8159	0.0033	ctrl	0.0381
1648	CGRRF1_-_-_0	3	3090	0.00097	27	8159	0.0033	ctrl	0.0381
1649	FBLN5_-_-_0	3	3090	0.00097	27	8159	0.0033	ctrl	0.0381
1650	PGAM5_132718_132718_0	3	3090	0.00097	27	8159	0.0033	ctrl	0.0381
1651	ATF6_-_-_1	3	3090	0.00097	27	8159	0.0033	ctrl	0.0381
1652	HIST1H4B_185397_185397_0	3	3090	0.00097	27	8159	0.0033	ctrl	0.0381
1653	PPP1R3C_251905_251905_0	3	3090	0.00097	27	8159	0.0033	ctrl	0.0381
1654	STT3B_251345_251345_0	3	3090	0.00097	27	8159	0.0033	ctrl	0.0381
1655	KPNA7_237987_237987_0	3	3090	0.00097	27	8159	0.0033	ctrl	0.0381
1656	MROH7_-_-_0	64	3029	0.0207	227	7959	0.0277	ctrl	0.0388
1657	PDGFRL_-_-_0	15	3078	0.0048	71	8115	0.0087	ctrl	0.0388
1658	FAM196A_-_-_0	20	3073	0.0065	88	8098	0.0108	ctrl	0.0391
1659	DDX23_-_-_2	21	3072	0.0068	30	8156	0.0037	case	0.0393
1660	NLRP11_238064_238064_0	21	3072	0.0068	30	8156	0.0037	case	0.0393
1661	PFKFB1_249753_249753_0	21	3072	0.0068	30	8156	0.0037	case	0.0393
1662	ZNF608_-_-_0	32	3061	0.0103	127	8059	0.0155	ctrl	0.0393
1663	ALDOB_188635_188635_0	15	3078	0.0048	72	8114	0.0088	ctrl	0.0394
1664	NARFL_251611_251611_0	15	3078	0.0048	72	8114	0.0088	ctrl	0.0394
1665	IMPG2_-_-_1	9	3084	0.0029	50	8136	0.0061	ctrl	0.0396
1666	MYOM2_238020_238020_3	9	3084	0.0029	50	8136	0.0061	ctrl	0.0396
1667	DLK1_-_-_2	9	3084	0.0029	50	8136	0.0061	ctrl	0.0396
1668	CYP51A1_249556_249556_0	9	3084	0.0029	50	8136	0.0061	ctrl	0.0396
1669	COL8A2_-_-_1	9	3084	0.0029	50	8136	0.0061	ctrl	0.0396
1670	DDR2_-_-_1	23	3070	0.0074	35	8151	0.0043	case	0.0396
1671	AK1_238713_238713_0	23	3070	0.0074	35	8151	0.0043	case	0.0396
1672	GALNT10_133004_133004_0	18	3075	0.0058	25	8161	0.0031	case	0.0397
1673	SPG20_-_-_1	18	3075	0.0058	25	8161	0.0031	case	0.0397
1674	AMIGO3_-_-_1	18	3075	0.0058	25	8161	0.0031	case	0.0397
1675	PCOLCE_239631_239631_0	18	3075	0.0058	25	8161	0.0031	case	0.0397
1676	UROD_238368_238368_0	18	3075	0.0058	25	8161	0.0031	case	0.0397
1677	BTNL8_143190_143190_0	18	3075	0.0058	25	8161	0.0031	case	0.0397
1678	GPR124_249498_249498_0	18	3075	0.0058	25	8161	0.0031	case	0.0397
1679	RPUSD2_-_-_0	18	3075	0.0058	25	8161	0.0031	case	0.0397
1680	ITIH4_-_-_1	26	3067	0.0084	41	8145	0.005	case	0.0398
1681	DSG4_-_-_5	26	3067	0.0084	41	8145	0.005	case	0.0398
1682	WNK1_-_-_2	47	3046	0.0152	175	8011	0.0214	ctrl	0.0399
1683	MUTYH_197771_197771_0	12	3081	0.0039	13	8173	0.0016	case	0.0399
1684	MEP1A_239752_239752_0	12	3081	0.0039	13	8173	0.0016	case	0.0399
1685	TFIP11_-_-_0	12	3081	0.0039	13	8173	0.0016	case	0.0399
1686	LZTFL1_-_-_0	12	3081	0.0039	13	8173	0.0016	case	0.0399
1687	EPHB2_173638_173638_0	12	3081	0.0039	13	8173	0.0016	case	0.0399
1688	FUT11_250177_250177_0	12	3081	0.0039	13	8173	0.0016	case	0.0399
1689	SNRNP35_-_-_1	12	3081	0.0039	13	8173	0.0016	case	0.0399
1690	PCDH12_206637_206637_5	12	3081	0.0039	13	8173	0.0016	case	0.0399
1691	RPS6KL1_173667_173667_0	12	3081	0.0039	13	8173	0.0016	case	0.0399
1692	CDK20_-_-_0	12	3081	0.0039	13	8173	0.0016	case	0.0399
1693	KCNH4_-_-_2	12	3081	0.0039	13	8173	0.0016	case	0.0399
1694	TMED9_250365_250365_0	12	3081	0.0039	13	8173	0.0016	case	0.0399
1695	RNF145_258003_258003_0	12	3081	0.0039	13	8173	0.0016	case	0.0399
1696	ANKRD35_-_-_0	12	3081	0.0039	13	8173	0.0016	case	0.0399
1697	CCDC41_-_-_0	23	3070	0.0074	98	8088	0.012	ctrl	0.04
1698	ANXA13_249668_249668_2	5	3088	0.0016	3	8183	0.000367	case	0.0401
1699	CAPN9_-_-_0	5	3088	0.0016	3	8183	0.000367	case	0.0401
1700	KDM4A_258107_258107_0	5	3088	0.0016	3	8183	0.000367	case	0.0401
1701	SMC6_213243_213243_1	5	3088	0.0016	3	8183	0.000367	case	0.0401
1702	KLHL41_-_-_6	5	3088	0.0016	3	8183	0.000367	case	0.0401
1703	PCDHGA7_206637_206637_2	5	3088	0.0016	3	8183	0.000367	case	0.0401
1704	DCLK1_-_-_0	5	3088	0.0016	3	8183	0.000367	case	0.0401
1705	RBM5_241196_241196_1	5	3088	0.0016	3	8183	0.000367	case	0.0401
1706	TNFSF18_-_-_1	5	3088	0.0016	3	8183	0.000367	case	0.0401
1707	TARM1_-_-_0	5	3088	0.0016	3	8183	0.000367	case	0.0401
1708	LPIN2_197870_197870_0	5	3088	0.0016	3	8183	0.000367	case	0.0401
1709	BMPR2_-_-_0	5	3088	0.0016	3	8183	0.000367	case	0.0401
1710	DPAGT1_-_-_0	5	3088	0.0016	3	8183	0.000367	case	0.0401
1711	MCF2_238103_238103_0	5	3088	0.0016	3	8183	0.000367	case	0.0401
1712	ITPRIPL2_-_-_1	5	3088	0.0016	3	8183	0.000367	case	0.0401
1713	CCND1_251658_251658_0	5	3088	0.0016	3	8183	0.000367	case	0.0401
1714	GMPPA_-_-_1	5	3088	0.0016	3	8183	0.000367	case	0.0401
1715	MAPRE3_-_-_1	5	3088	0.0016	3	8183	0.000367	case	0.0401
1716	SVEP1_153056_153056_24	5	3088	0.0016	3	8183	0.000367	case	0.0401
1717	TBC1D9_241505_241505_1	5	3088	0.0016	3	8183	0.000367	case	0.0401
1718	TAF4_-_-_1	5	3088	0.0016	3	8183	0.000367	case	0.0401
1719	PRPS1L1_206754_206754_0	5	3088	0.0016	3	8183	0.000367	case	0.0401
1720	ZNF432_-_-_1	5	3088	0.0016	3	8183	0.000367	case	0.0401
1721	CAMK2D_-_-_1	5	3088	0.0016	3	8183	0.000367	case	0.0401
1722	GPATCH11_258098_258098_0	5	3088	0.0016	3	8183	0.000367	case	0.0401
1723	BEX4_191022_191022_0	5	3088	0.0016	3	8183	0.000367	case	0.0401
1724	PCDHGA8_-_-_0	5	3088	0.0016	3	8183	0.000367	case	0.0401
1725	ATP11B_257602_257602_0	5	3088	0.0016	3	8183	0.000367	case	0.0401
1726	SLC30A7_-_-_0	5	3088	0.0016	3	8183	0.000367	case	0.0401
1727	ZNF160_257789_257789_7	5	3088	0.0016	3	8183	0.000367	case	0.0401
1728	SLC4A10_254292_254292_0	5	3088	0.0016	3	8183	0.000367	case	0.0401
1729	MLXIPL_-_-_0	5	3088	0.0016	3	8183	0.000367	case	0.0401
1730	ZNF548_257789_257789_1	5	3088	0.0016	3	8183	0.000367	case	0.0401
1731	KLHDC8B_250548_250548_1	5	3088	0.0016	3	8183	0.000367	case	0.0401
1732	ARAP3_250133_250133_0	5	3088	0.0016	3	8183	0.000367	case	0.0401
1733	MAST2_-_-_1	5	3088	0.0016	3	8183	0.000367	case	0.0401
1734	F5_259992_259992_0	5	3088	0.0016	3	8183	0.000367	case	0.0401
1735	TKTL1_-_-_0	5	3088	0.0016	3	8183	0.000367	case	0.0401
1736	MDM2_-_-_1	5	3088	0.0016	3	8183	0.000367	case	0.0401
1737	PKD1L1_250143_250143_1	5	3088	0.0016	3	8183	0.000367	case	0.0401
1738	PKP4_-_-_2	5	3088	0.0016	3	8183	0.000367	case	0.0401
1739	FAF2_239289_239289_0	5	3088	0.0016	3	8183	0.000367	case	0.0401
1740	USP40_-_-_1	5	3088	0.0016	3	8183	0.000367	case	0.0401
1741	OTX1_-_-_0	5	3088	0.0016	3	8183	0.000367	case	0.0401
1742	SEC24B_-_-_4	5	3088	0.0016	3	8183	0.000367	case	0.0401
1743	FAM135B_257021_257021_1	5	3088	0.0016	3	8183	0.000367	case	0.0401
1744	LRP4_-_-_13	5	3088	0.0016	3	8183	0.000367	case	0.0401
1745	KPNA5_237987_237987_0	5	3088	0.0016	3	8183	0.000367	case	0.0401
1746	FKBP7_238008_238008_0	5	3088	0.0016	3	8183	0.000367	case	0.0401
1747	FRAS1_249582_249582_2	5	3088	0.0016	3	8183	0.000367	case	0.0401
1748	NCOA1_254217_254217_0	5	3088	0.0016	3	8183	0.000367	case	0.0401
1749	OTUD5_-_-_0	5	3088	0.0016	3	8183	0.000367	case	0.0401
1750	HSPG2_238012_238012_4	5	3088	0.0016	3	8183	0.000367	case	0.0401
1751	ARSH_-_-_1	5	3088	0.0016	3	8183	0.000367	case	0.0401
1752	CHD8_-_-_3	5	3088	0.0016	3	8183	0.000367	case	0.0401
1753	TNC_249533_249533_14	5	3088	0.0016	3	8183	0.000367	case	0.0401
1754	C11orf74_-_-_0	5	3088	0.0016	3	8183	0.000367	case	0.0401
1755	PCDH15_-_-_2	5	3088	0.0016	3	8183	0.000367	case	0.0401
1756	KRTDAP_259334_259334_0	5	3088	0.0016	3	8183	0.000367	case	0.0401
1757	TRAK2_256982_256982_0	5	3088	0.0016	3	8183	0.000367	case	0.0401
1758	FPGT_100056_100056_0	5	3088	0.0016	3	8183	0.000367	case	0.0401
1759	RPA1_-_-_3	5	3088	0.0016	3	8183	0.000367	case	0.0401
1760	C12orf54_-_-_0	5	3088	0.0016	3	8183	0.000367	case	0.0401
1761	GRN_-_-_6	5	3088	0.0016	3	8183	0.000367	case	0.0401
1762	ZBTB7C_250031_250031_0	5	3088	0.0016	3	8183	0.000367	case	0.0401
1763	IL17F_-_-_1	5	3088	0.0016	3	8183	0.000367	case	0.0401
1764	SAG_-_-_1	5	3088	0.0016	3	8183	0.000367	case	0.0401
1765	ARFGAP3_-_-_0	11	3082	0.0036	57	8129	0.007	ctrl	0.0402
1766	DEFB118_206012_206012_0	10	3083	0.0032	10	8176	0.0012	case	0.0404
1767	FAM69C_259012_259012_0	10	3083	0.0032	10	8176	0.0012	case	0.0404
1768	MRPS18B_-_-_0	10	3083	0.0032	10	8176	0.0012	case	0.0404
1769	S100A6_240155_240155_0	10	3083	0.0032	10	8176	0.0012	case	0.0404
1770	MYO7B_-_-_2	10	3083	0.0032	10	8176	0.0012	case	0.0404
1771	ZFAND3_-_-_0	10	3083	0.0032	10	8176	0.0012	case	0.0404
1772	SYTL3_-_-_1	10	3083	0.0032	10	8176	0.0012	case	0.0404
1773	IL18R1_-_-_0	10	3083	0.0032	10	8176	0.0012	case	0.0404
1774	AGRN_-_-_12	10	3083	0.0032	10	8176	0.0012	case	0.0404
1775	OBSCN_143165_143165_3	10	3083	0.0032	10	8176	0.0012	case	0.0404
1776	USP6_-_-_0	10	3083	0.0032	10	8176	0.0012	case	0.0404
1777	APOA2_113479_113479_0	10	3083	0.0032	10	8176	0.0012	case	0.0404
1778	WDFY4_238121_238121_0	10	3083	0.0032	10	8176	0.0012	case	0.0404
1779	SSTR4_255910_255910_0	10	3083	0.0032	10	8176	0.0012	case	0.0404
1780	GARNL3_-_-_1	10	3083	0.0032	10	8176	0.0012	case	0.0404
1781	C7orf31_259230_259230_0	10	3083	0.0032	10	8176	0.0012	case	0.0404
1782	DNAI2_-_-_1	10	3083	0.0032	10	8176	0.0012	case	0.0404
1783	TRDMT1_-_-_1	10	3083	0.0032	10	8176	0.0012	case	0.0404
1784	COL27A1_-_-_4	30	3063	0.0097	48	8138	0.0059	case	0.0405
1785	FRY_-_-_4	33	3060	0.0107	55	8131	0.0067	case	0.0408
1786	CD22_-_-_6	16	3077	0.0052	21	8165	0.0026	case	0.0408
1787	MEX3C_-_-_1	16	3077	0.0052	21	8165	0.0026	case	0.0408
1788	NIPSNAP3B_254560_254560_1	16	3077	0.0052	21	8165	0.0026	case	0.0408
1789	TNFRSF10A_-_-_1	16	3077	0.0052	21	8165	0.0026	case	0.0408
1790	SLC47A2_240537_240537_0	24	3069	0.0078	36	8150	0.0044	case	0.0409
1791	LIPE_-_-_1	24	3069	0.0078	36	8150	0.0044	case	0.0409
1792	PTGFRN_-_-_1	40	3053	0.0129	70	8116	0.0086	case	0.0409
1793	ASTN2_-_-_2	36	3057	0.0116	62	8124	0.0076	case	0.041
1794	FMN2_-_-_0	48	3045	0.0155	87	8099	0.0106	case	0.041
1795	RNF10_-_-_0	14	3079	0.0045	17	8169	0.0021	case	0.0411
1796	AEBP1_238014_238014_0	14	3079	0.0045	17	8169	0.0021	case	0.0411
1797	SLC35B4_129885_129885_0	14	3079	0.0045	17	8169	0.0021	case	0.0411
1798	MRGPRX2_-_-_0	14	3079	0.0045	17	8169	0.0021	case	0.0411
1799	FCHSD1_153362_153362_0	18	3075	0.0058	81	8105	0.0099	ctrl	0.0412
1800	CASKIN1_-_-_2	6	3087	0.0019	38	8148	0.0046	ctrl	0.0417
1801	DCTN2_-_-_0	6	3087	0.0019	38	8148	0.0046	ctrl	0.0417
1802	CAMTA2_-_-_2	6	3087	0.0019	38	8148	0.0046	ctrl	0.0417
1803	MMS19_-_-_1	6	3087	0.0019	38	8148	0.0046	ctrl	0.0417
1804	RFX1_-_-_0	6	3087	0.0019	38	8148	0.0046	ctrl	0.0417
1805	NFKBIZ_-_-_0	6	3087	0.0019	38	8148	0.0046	ctrl	0.0417
1806	TMEM79_-_-_0	37	3056	0.012	63	8123	0.0077	case	0.0419
1807	SQSTM1_99723_99723_0	0	3093	0	11	8175	0.0013	ctrl	0.0423
1808	APAF1_-_-_3	0	3093	0	11	8175	0.0013	ctrl	0.0423
1809	ASXL1_206093_206093_0	0	3093	0	11	8175	0.0013	ctrl	0.0423
1810	DCHS1_206637_206637_1	0	3093	0	11	8175	0.0013	ctrl	0.0423
1811	OR5B21_-_-_1	0	3093	0	11	8175	0.0013	ctrl	0.0423
1812	EPB41L5_-_-_1	0	3093	0	11	8175	0.0013	ctrl	0.0423
1813	MUTYH_-_-_1	0	3093	0	11	8175	0.0013	ctrl	0.0423
1814	BAIAP3_176058_176058_1	0	3093	0	11	8175	0.0013	ctrl	0.0423
1815	SOX5_-_-_0	0	3093	0	11	8175	0.0013	ctrl	0.0423
1816	GFOD1_-_-_0	0	3093	0	11	8175	0.0013	ctrl	0.0423
1817	TRIM50_237988_237988_0	0	3093	0	11	8175	0.0013	ctrl	0.0423
1818	PRRX1_-_-_0	0	3093	0	11	8175	0.0013	ctrl	0.0423
1819	RBM19_-_-_1	0	3093	0	11	8175	0.0013	ctrl	0.0423
1820	YTHDC2_238005_238005_0	0	3093	0	11	8175	0.0013	ctrl	0.0423
1821	ESF1_254638_254638_0	0	3093	0	11	8175	0.0013	ctrl	0.0423
1822	SHB_198252_198252_0	0	3093	0	11	8175	0.0013	ctrl	0.0423
1823	NRK_173725_173725_0	0	3093	0	11	8175	0.0013	ctrl	0.0423
1824	ILK_238125_238125_0	0	3093	0	11	8175	0.0013	ctrl	0.0423
1825	ZNF614_-_-_0	0	3093	0	11	8175	0.0013	ctrl	0.0423
1826	PPP1R12B_238125_238125_1	0	3093	0	11	8175	0.0013	ctrl	0.0423
1827	ZNF454_214630_214630_0	0	3093	0	11	8175	0.0013	ctrl	0.0423
1828	SLC22A23_119392_119392_0	0	3093	0	11	8175	0.0013	ctrl	0.0423
1829	MRPL53_256163_256163_0	0	3093	0	11	8175	0.0013	ctrl	0.0423
1830	USP16_-_-_1	0	3093	0	11	8175	0.0013	ctrl	0.0423
1831	NOTCH1_238011_238011_14	0	3093	0	11	8175	0.0013	ctrl	0.0423
1832	ZNF664_-_-_3	0	3093	0	11	8175	0.0013	ctrl	0.0423
1833	CFHR5_153056_153056_1	0	3093	0	11	8175	0.0013	ctrl	0.0423
1834	PTPRB_249533_249533_14	0	3093	0	11	8175	0.0013	ctrl	0.0423
1835	MRPL21_-_-_1	0	3093	0	11	8175	0.0013	ctrl	0.0423
1836	YTHDF1_-_-_0	0	3093	0	11	8175	0.0013	ctrl	0.0423
1837	GCNT2_-_-_1	0	3093	0	11	8175	0.0013	ctrl	0.0423
1838	PEX13_212798_212798_0	0	3093	0	11	8175	0.0013	ctrl	0.0423
1839	F2_238056_238056_1	0	3093	0	11	8175	0.0013	ctrl	0.0423
1840	SOHLH1_-_-_1	0	3093	0	11	8175	0.0013	ctrl	0.0423
1841	CACNB1_214504_214504_0	0	3093	0	11	8175	0.0013	ctrl	0.0423
1842	DHX38_-_-_4	0	3093	0	11	8175	0.0013	ctrl	0.0423
1843	EPB41L1_255329_255329_0	0	3093	0	11	8175	0.0013	ctrl	0.0423
1844	CDC42BPB_-_-_1	0	3093	0	11	8175	0.0013	ctrl	0.0423
1845	MAGEB1_257050_257050_0	0	3093	0	11	8175	0.0013	ctrl	0.0423
1846	NAAA_-_-_1	0	3093	0	11	8175	0.0013	ctrl	0.0423
1847	STARD8_239840_239840_0	0	3093	0	11	8175	0.0013	ctrl	0.0423
1848	DNAH6_-_-_4	0	3093	0	11	8175	0.0013	ctrl	0.0423
1849	USP30_-_-_0	0	3093	0	11	8175	0.0013	ctrl	0.0423
1850	ACSM2A_-_-_0	0	3093	0	11	8175	0.0013	ctrl	0.0423
1851	MSH2_-_-_4	0	3093	0	11	8175	0.0013	ctrl	0.0423
1852	SLC38A2_-_-_1	0	3093	0	11	8175	0.0013	ctrl	0.0423
1853	KCNA3_-_-_1	0	3093	0	11	8175	0.0013	ctrl	0.0423
1854	DCHS1_206637_206637_24	0	3093	0	11	8175	0.0013	ctrl	0.0423
1855	INVS_-_-_2	0	3093	0	11	8175	0.0013	ctrl	0.0423
1856	ZNF397_-_-_0	0	3093	0	11	8175	0.0013	ctrl	0.0423
1857	TTN_238020_238020_21	0	3093	0	11	8175	0.0013	ctrl	0.0423
1858	KIDINS220_238125_238125_0	0	3093	0	11	8175	0.0013	ctrl	0.0423
1859	SKAP1_241531_241531_0	0	3093	0	11	8175	0.0013	ctrl	0.0423
1860	FSD2_214495_214495_1	0	3093	0	11	8175	0.0013	ctrl	0.0423
1861	AOX1_-_-_1	0	3093	0	11	8175	0.0013	ctrl	0.0423
1862	ATM_-_-_2	0	3093	0	11	8175	0.0013	ctrl	0.0423
1863	RARRES1_-_-_1	0	3093	0	11	8175	0.0013	ctrl	0.0423
1864	TDRD1_-_-_1	0	3093	0	11	8175	0.0013	ctrl	0.0423
1865	FAM47E-STBD1_-_-_0	0	3093	0	11	8175	0.0013	ctrl	0.0423
1866	PUS1_-_-_1	0	3093	0	11	8175	0.0013	ctrl	0.0423
1867	EFEMP2_254326_254326_0	0	3093	0	11	8175	0.0013	ctrl	0.0423
1868	SLCO3A1_238650_238650_0	0	3093	0	11	8175	0.0013	ctrl	0.0423
1869	DUOX1_-_-_4	0	3093	0	11	8175	0.0013	ctrl	0.0423
1870	REL_143649_143649_0	0	3093	0	11	8175	0.0013	ctrl	0.0423
1871	MAGEA6_-_-_2	0	3093	0	11	8175	0.0013	ctrl	0.0423
1872	KLRK1_153063_153063_0	0	3093	0	11	8175	0.0013	ctrl	0.0423
1873	SIGLEC14_-_-_0	0	3093	0	11	8175	0.0013	ctrl	0.0423
1874	ZNF480_257789_257789_2	0	3093	0	11	8175	0.0013	ctrl	0.0423
1875	NAT10_-_-_0	0	3093	0	11	8175	0.0013	ctrl	0.0423
1876	PIGR_-_-_5	0	3093	0	11	8175	0.0013	ctrl	0.0423
1877	LAMC3_214543_214543_1	0	3093	0	11	8175	0.0013	ctrl	0.0423
1878	ZNF572_-_-_5	0	3093	0	11	8175	0.0013	ctrl	0.0423
1879	KLHL36_250031_250031_0	0	3093	0	11	8175	0.0013	ctrl	0.0423
1880	BIVM_-_-_0	6	3087	0.0019	39	8147	0.0048	ctrl	0.0427
1881	HNF1A_-_-_0	6	3087	0.0019	39	8147	0.0048	ctrl	0.0427
1882	RYR3_-_-_2	6	3087	0.0019	39	8147	0.0048	ctrl	0.0427
1883	GPBP1_-_-_0	6	3087	0.0019	39	8147	0.0048	ctrl	0.0427
1884	HMBS_238276_238276_0	6	3087	0.0019	39	8147	0.0048	ctrl	0.0427
1885	CLK3_-_-_0	6	3087	0.0019	39	8147	0.0048	ctrl	0.0427
1886	ACTN2_249855_249855_1	6	3087	0.0019	39	8147	0.0048	ctrl	0.0427
1887	MYO15A_-_-_4	6	3087	0.0019	39	8147	0.0048	ctrl	0.0427
1888	HMGCS2_254865_254865_0	6	3087	0.0019	39	8147	0.0048	ctrl	0.0427
1889	RASSF7_-_-_1	33	3060	0.0107	56	8130	0.0068	case	0.0431
1890	USP34_-_-_1	41	3052	0.0133	154	8032	0.0188	ctrl	0.0431
1891	TCOF1_-_-_1	58	3035	0.0188	207	7979	0.0253	ctrl	0.0432
1892	FREM2_-_-_0	58	3035	0.0188	207	7979	0.0253	ctrl	0.0432
1893	CSHL1_198435_198435_0	16	3077	0.0052	74	8112	0.009	ctrl	0.0432
1894	PHF3_-_-_3	16	3077	0.0052	74	8112	0.009	ctrl	0.0432
1895	LZTR1_-_-_3	27	3066	0.0087	43	8143	0.0053	case	0.0432
1896	CYP2J2_249556_249556_0	37	3056	0.012	64	8122	0.0078	case	0.0433
1897	SMG5_-_-_1	41	3052	0.0133	72	8114	0.0088	case	0.0434
1898	ERC1_-_-_0	41	3052	0.0133	72	8114	0.0088	case	0.0434
1899	YTHDC1_-_-_1	24	3069	0.0078	37	8149	0.0045	case	0.0434
1900	PADI3_149544_149544_0	24	3069	0.0078	37	8149	0.0045	case	0.0434
1901	SPTLC1_178417_178417_0	24	3069	0.0078	37	8149	0.0045	case	0.0434
1902	HELZ2_257490_257490_1	24	3069	0.0078	37	8149	0.0045	case	0.0434
1903	USP40_-_-_0	62	3031	0.02	119	8067	0.0145	case	0.0435
1904	ADAMTS13_-_-_2	49	3044	0.0158	90	8096	0.011	case	0.0441
1905	BRDT_-_-_2	14	3079	0.0045	66	8120	0.0081	ctrl	0.0448
1906	FAM149B1_-_-_1	14	3079	0.0045	66	8120	0.0081	ctrl	0.0448
1907	KRTAP10-2_-_-_0	8	3085	0.0026	45	8141	0.0055	ctrl	0.0448
1908	ZSCAN32_258112_258112_0	8	3085	0.0026	45	8141	0.0055	ctrl	0.0448
1909	PRSS21_238113_238113_0	8	3085	0.0026	45	8141	0.0055	ctrl	0.0448
1910	TMEM87B_253926_253926_0	8	3085	0.0026	45	8141	0.0055	ctrl	0.0448
1911	GOLGA2_-_-_0	42	3051	0.0136	157	8029	0.0192	ctrl	0.045
1912	ZDHHC19_-_-_1	0	3093	0	12	8174	0.0015	ctrl	0.0451
1913	CLEC2B_153063_153063_0	0	3093	0	12	8174	0.0015	ctrl	0.0451
1914	FCER1A_143230_143230_0	0	3093	0	12	8174	0.0015	ctrl	0.0451
1915	GAS2_111117_111117_0	0	3093	0	12	8174	0.0015	ctrl	0.0451
1916	PKHD1_238337_238337_3	0	3093	0	12	8174	0.0015	ctrl	0.0451
1917	THSD4_214559_214559_2	0	3093	0	12	8174	0.0015	ctrl	0.0451
1918	HIGD1B_-_-_0	0	3093	0	12	8174	0.0015	ctrl	0.0451
1919	PDE6D_203238_203238_0	0	3093	0	12	8174	0.0015	ctrl	0.0451
1920	RGL2_-_-_3	0	3093	0	12	8174	0.0015	ctrl	0.0451
1921	AOX1_214971_214971_0	0	3093	0	12	8174	0.0015	ctrl	0.0451
1922	FBXO9_-_-_1	0	3093	0	12	8174	0.0015	ctrl	0.0451
1923	OR4K5_-_-_1	0	3093	0	12	8174	0.0015	ctrl	0.0451
1924	NYAP2_-_-_0	0	3093	0	12	8174	0.0015	ctrl	0.0451
1925	FAM71B_-_-_1	0	3093	0	12	8174	0.0015	ctrl	0.0451
1926	TDRD5_-_-_3	0	3093	0	12	8174	0.0015	ctrl	0.0451
1927	C12orf49_255830_255830_0	0	3093	0	12	8174	0.0015	ctrl	0.0451
1928	PPM1N_-_-_1	0	3093	0	12	8174	0.0015	ctrl	0.0451
1929	SLC37A1_-_-_1	0	3093	0	12	8174	0.0015	ctrl	0.0451
1930	UTP3_255320_255320_0	0	3093	0	12	8174	0.0015	ctrl	0.0451
1931	SEZ6L_214478_214478_2	0	3093	0	12	8174	0.0015	ctrl	0.0451
1932	CLSTN3_206637_206637_1	0	3093	0	12	8174	0.0015	ctrl	0.0451
1933	NFAM1_-_-_0	0	3093	0	12	8174	0.0015	ctrl	0.0451
1934	SMCHD1_257904_257904_0	0	3093	0	12	8174	0.0015	ctrl	0.0451
1935	CST9L_214484_214484_0	0	3093	0	12	8174	0.0015	ctrl	0.0451
1936	PLCH1_241518_241518_0	0	3093	0	12	8174	0.0015	ctrl	0.0451
1937	TRAT1_-_-_1	0	3093	0	12	8174	0.0015	ctrl	0.0451
1938	PIGA_99970_99970_0	0	3093	0	12	8174	0.0015	ctrl	0.0451
1939	DEAF1_-_-_2	0	3093	0	12	8174	0.0015	ctrl	0.0451
1940	COL27A1_189968_189968_1	0	3093	0	12	8174	0.0015	ctrl	0.0451
1941	MSR1_252009_252009_0	0	3093	0	12	8174	0.0015	ctrl	0.0451
1942	CLCN6_-_-_1	0	3093	0	12	8174	0.0015	ctrl	0.0451
1943	ZNF300_257789_257789_2	0	3093	0	12	8174	0.0015	ctrl	0.0451
1944	FAT4_206637_206637_18	0	3093	0	12	8174	0.0015	ctrl	0.0451
1945	GLT8D1_-_-_1	0	3093	0	12	8174	0.0015	ctrl	0.0451
1946	ABHD5_214007_214007_0	0	3093	0	12	8174	0.0015	ctrl	0.0451
1947	EMILIN2_131526_131526_0	0	3093	0	12	8174	0.0015	ctrl	0.0451
1948	HDHD2_-_-_1	0	3093	0	12	8174	0.0015	ctrl	0.0451
1949	ECHS1_-_-_0	0	3093	0	12	8174	0.0015	ctrl	0.0451
1950	CPN1_200604_200604_0	0	3093	0	12	8174	0.0015	ctrl	0.0451
1951	OSBPL1A_241439_241439_0	0	3093	0	12	8174	0.0015	ctrl	0.0451
1952	SHBG_-_-_0	0	3093	0	12	8174	0.0015	ctrl	0.0451
1953	GJA8_151113_151113_0	0	3093	0	12	8174	0.0015	ctrl	0.0451
1954	CST4_-_-_1	0	3093	0	12	8174	0.0015	ctrl	0.0451
1955	FCRL2_143230_143230_0	0	3093	0	12	8174	0.0015	ctrl	0.0451
1956	AQP12B_238204_238204_0	0	3093	0	12	8174	0.0015	ctrl	0.0451
1957	CAB39_254887_254887_0	0	3093	0	12	8174	0.0015	ctrl	0.0451
1958	TAF5_176269_176269_0	0	3093	0	12	8174	0.0015	ctrl	0.0451
1959	SULF1_-_-_2	0	3093	0	12	8174	0.0015	ctrl	0.0451
1960	TTN_143224_143224_41	0	3093	0	12	8174	0.0015	ctrl	0.0451
1961	ZNF683_257789_257789_0	0	3093	0	12	8174	0.0015	ctrl	0.0451
1962	LIFR_249533_249533_0	0	3093	0	12	8174	0.0015	ctrl	0.0451
1963	DMGDH_-_-_2	12	3081	0.0039	14	8172	0.0017	case	0.0451
1964	UPK1B_-_-_0	12	3081	0.0039	14	8172	0.0017	case	0.0451
1965	PTPN6_-_-_3	12	3081	0.0039	14	8172	0.0017	case	0.0451
1966	FBLN1_-_-_2	12	3081	0.0039	14	8172	0.0017	case	0.0451
1967	CYGB_238510_238510_0	12	3081	0.0039	14	8172	0.0017	case	0.0451
1968	MSANTD2_-_-_0	12	3081	0.0039	14	8172	0.0017	case	0.0451
1969	ZSCAN21_-_-_1	12	3081	0.0039	14	8172	0.0017	case	0.0451
1970	SLC22A25_-_-_2	12	3081	0.0039	14	8172	0.0017	case	0.0451
1971	PHLDB2_238103_238103_0	12	3081	0.0039	14	8172	0.0017	case	0.0451
1972	UNC5D_-_-_3	12	3081	0.0039	14	8172	0.0017	case	0.0451
1973	PTPRM_238006_238006_0	12	3081	0.0039	14	8172	0.0017	case	0.0451
1974	FBLN2_-_-_0	8	3085	0.0026	46	8140	0.0056	ctrl	0.0454
1975	WDR11_-_-_1	8	3085	0.0026	46	8140	0.0056	ctrl	0.0454
1976	ATP11A_-_-_4	8	3085	0.0026	46	8140	0.0056	ctrl	0.0454
1977	BRI3BP_259102_259102_0	8	3085	0.0026	46	8140	0.0056	ctrl	0.0454
1978	CEP120_-_-_1	19	3074	0.0061	27	8159	0.0033	case	0.0455
1979	ADAMTS16_239801_239801_0	19	3074	0.0061	27	8159	0.0033	case	0.0455
1980	CAPN13_128526_128526_0	45	3048	0.0145	82	8104	0.01	case	0.0455
1981	ALPP_249712_249712_0	34	3059	0.011	58	8128	0.0071	case	0.0457
1982	KIAA0895_-_-_1	12	3081	0.0039	59	8127	0.0072	ctrl	0.0458
1983	MFSD2A_236610_236610_0	12	3081	0.0039	59	8127	0.0072	ctrl	0.0458
1984	SRCIN1_-_-_0	31	3062	0.01	51	8135	0.0062	case	0.0458
1985	NXPE1_-_-_0	10	3083	0.0032	52	8134	0.0064	ctrl	0.0459
1986	ZNF770_-_-_0	10	3083	0.0032	52	8134	0.0064	ctrl	0.0459
1987	CYP19A1_249556_249556_0	10	3083	0.0032	52	8134	0.0064	ctrl	0.0459
1988	MFSD9_-_-_0	12	3081	0.0039	60	8126	0.0073	ctrl	0.0459
1989	DIS3_-_-_1	12	3081	0.0039	60	8126	0.0073	ctrl	0.0459
1990	MARVELD2_-_-_0	12	3081	0.0039	60	8126	0.0073	ctrl	0.0459
1991	SYNE1_-_-_13	10	3083	0.0032	53	8133	0.0065	ctrl	0.0463
1992	CWC25_-_-_0	16	3077	0.0052	22	8164	0.0027	case	0.0465
1993	CPEB4_-_-_0	16	3077	0.0052	22	8164	0.0027	case	0.0465
1994	MGAM_-_-_4	16	3077	0.0052	22	8164	0.0027	case	0.0465
1995	MYBL1_-_-_0	16	3077	0.0052	22	8164	0.0027	case	0.0465
1996	SPPL2C_214793_214793_0	16	3077	0.0052	22	8164	0.0027	case	0.0465
1997	FAM114A1_-_-_1	5	3088	0.0016	34	8152	0.0042	ctrl	0.0465
1998	BPI_250495_250495_0	5	3088	0.0016	34	8152	0.0042	ctrl	0.0465
[truncated: 84,265 more rows]
