# Supplementary material for: A new approach for rare variation collapsing on functional protein domains implicates specific genic regions in ALS
Source: HighWire-hosted journal article supplement (doi:10.1101/gr.243592.118), 2019-04-02
Supplement: Supplemental_Table_S3.xlsx [file Supplemental_Table_S3.xlsx]

## Sheet: aaoAllGenesPvalue
Supplementary Table S3. Age-At-Onset analysis for 11,541 with 3 or more carriers
Gene	p.value	direction	mean AAO	#cases	is known ALS gene
MVK	0.000124742	late	70.4167	12	N
SLFN5	0.000388017	early	39.875	8	N
UGT2B17	0.000651821	late	69	12	N
PGF	0.000726215	early	35.4	5	N
LGALSL	0.000810373	early	43.8182	11	N
PTCD2	0.000993209	early	42.75	8	N
ATCAY	0.00109259	late	68	13	N
ABCA3	0.00118893	early	49.3548	31	N
ACAT2	0.00128783	early	45	11	N
HSPA13	0.00129952	late	69.5556	9	N
NGDN	0.0014808	early	45.5	10	N
PTPN22	0.00153072	late	67.9167	12	N
PYCR2	0.00165439	early	46.4286	14	N
HECTD2	0.00177755	late	69.1	10	N
MRPL24	0.00192448	late	73.5	6	N
CLEC7A	0.00214758	late	72	6	N
KCNT2	0.00221409	early	37.8	5	N
PARN	0.002477	early	46.7692	13	N
GBP4	0.00248911	early	46	12	N
ABCC2	0.00251953	late	71	7	N
UGT3A2	0.00275696	late	71.1429	7	N
SREBF2	0.00299389	early	42.6667	6	N
VPS53	0.00300113	late	63.9032	31	N
PABPC1	0.00303974	early	34.5	4	N
FEZF1	0.00322985	early	34.75	4	N
SLC24A1	0.00326785	early	48.2222	18	N
ADRB1	0.00333919	late	68.7	10	N
TMC3	0.00346608	late	63.8214	28	N
ZFP2	0.0035248	late	75.5	4	N
TFAP4	0.00353102	late	72	5	N
ABHD2	0.00363489	late	73	6	N
NLRP7	0.00369053	late	70.4286	7	N
APEX2	0.00391071	late	69.3333	9	N
RASGRP1	0.00428352	early	48.8	20	N
OR51F1	0.00470271	late	75.75	4	N
TSPYL1	0.00476652	late	66.7778	9	N
CPN1	0.00495964	early	49.4	15	N
SLC23A2	0.00521131	early	44.6667	9	N
TRPC1	0.00540858	late	68.6364	11	N
SCAMP5	0.00549853	late	70.8571	7	N
BAHD1	0.00550803	late	77.6667	3	N
CD300LD	0.00554789	late	73.75	4	N
OLIG3	0.00569322	early	37.75	4	N
ODF3L2	0.00573079	early	45	8	N
CLEC2A	0.00583369	late	77.3333	3	N
ZNF426	0.00591884	late	68.8889	9	N
SPDYE4	0.00603557	late	67.3636	11	N
JRKL	0.00610112	late	70	7	N
SORCS1	0.00634241	late	63.5357	28	N
TBC1D31	0.00665579	late	65.7857	14	N
SMC3	0.00679058	early	42.25	8	N
CCDC106	0.00686507	late	67.8889	9	N
EPM2AIP1	0.00689287	early	47.3846	13	N
MGST3	0.00689974	early	45.375	8	N
NKX6-1	0.00690703	early	36.5	6	N
NEURL4	0.00694358	early	51.1538	39	N
REEP3	0.00696548	early	40	4	N
KCTD18	0.00697333	late	68.4444	9	N
WDR81	0.00701569	early	50.9412	34	N
ZNF689	0.00702137	early	44.1	10	N
FXR2	0.00717955	late	65.4375	16	N
HBB	0.00731866	late	71	5	N
NPTXR	0.00738508	late	68.2222	9	N
ARHGEF11	0.00763848	late	68.5	8	N
COX7A1	0.00767963	early	43.7143	7	N
GUCY1A2	0.00770807	late	67.1111	9	N
GALNT14	0.0077251	late	64.875	16	N
CHAMP1	0.0078662	early	50.4643	28	N
CBL	0.0079312	late	70.5714	7	N
PHLPP2	0.00802982	late	63.0968	31	N
SGMS2	0.00813287	late	71	6	N
DYNC1H1	0.00813513	late	63.4	30	N
HMCN1	0.00813595	early	52.6667	51	N
JAG1	0.00820921	early	48.7647	17	N
ADAM32	0.00834211	late	66.3636	11	N
LAP3	0.00839111	early	45.0833	12	N
LAMA4	0.00843311	late	69.2857	7	N
SPERT	0.00851553	late	68.8571	7	N
VPS33A	0.00855941	late	63.3333	21	N
ANKK1	0.00870033	late	73	4	N
TRIP10	0.0087196	early	48.5556	18	N
HPS5	0.00883675	late	73.75	4	N
SMG5	0.0088788	early	52.093	43	N
TMEM41A	0.00892618	early	45.7143	7	N
IRS2	0.00903259	early	40.5	4	N
WDR63	0.00907269	early	28.6667	3	N
CSHL1	0.00912904	early	42.4	5	N
DCAF16	0.00917365	early	39.5	4	N
XPNPEP1	0.00917479	late	68.6667	9	N
WRN	0.00922369	late	65.5333	15	N
TLR5	0.00927116	late	68.7143	7	N
KIDINS220	0.00942027	early	49.9545	22	N
KIAA1551	0.00943036	early	42.1667	6	N
MGAT5B	0.00950135	late	65.4286	14	N
CEP85L	0.00962111	early	47.2	10	N
ANKRD17	0.00970107	early	50.08	25	N
TMTC2	0.009767	late	68	8	N
ATF6B	0.00986011	late	68	9	N
FANCD2	0.00987302	early	45.6667	6	N
MTA2	0.0099892	early	47.6667	12	N
ELP2	0.0100711	late	72.25	4	N
PCDH10	0.0101237	late	66.7	10	N
EFEMP2	0.0101553	late	66.8889	9	N
HIST1H1D	0.0102688	late	62.9231	26	N
SCYL2	0.0103083	late	68.4286	7	N
AMIGO3	0.0104778	early	41	4	N
SCN2B	0.0106578	early	39.5	4	N
LPL	0.0106876	early	36.3333	3	N
OR2G6	0.0108209	early	36	3	N
TOE1	0.0109511	late	65.6875	16	N
LMNB2	0.0110015	early	47.1667	12	N
ADCY4	0.0110026	early	48.85	20	N
BAG6	0.0111624	late	64	19	N
NLE1	0.0113883	late	70.3333	6	N
ASB11	0.0117845	early	38	3	N
ZSCAN4	0.0118349	late	71.6	5	N
STIP1	0.0118473	late	67	10	N
OR4F6	0.011972	early	43.8333	6	N
GPCPD1	0.0119801	early	49.5294	17	N
HM13	0.0120501	early	44.1667	6	N
KIAA1324	0.0120647	late	77.3333	3	N
ARFGEF1	0.0120677	early	51.5172	29	N
KSR2	0.0123196	late	63.3043	23	N
ADTRP	0.0123256	early	36.6667	3	N
MXD3	0.0123469	early	45.1429	7	N
RASGEF1C	0.012461	late	66	13	N
MEGF6	0.0125101	late	64.15	20	N
MAGEE1	0.0127222	early	43.7143	7	N
GPR155	0.0128326	late	64.0556	18	N
DUSP9	0.0129408	late	74.3333	3	N
SETDB2	0.0129668	late	72.8333	6	N
ZFR	0.0130449	late	64.4118	17	N
PKD1L1	0.0130674	early	48.8667	15	N
OR6C65	0.0131253	late	74	3	N
POLR1B	0.0134452	early	46.5833	12	N
SLC2A5	0.0134574	early	40	6	N
SLC6A7	0.0134602	early	36.25	4	N
ESPL1	0.0136568	early	53.2979	47	N
KIF13B	0.0136593	early	52.0909	33	N
TMEM44	0.0136991	early	42.6667	6	N
TMEM225	0.0137095	early	44.1429	7	N
KRTAP4-7	0.0137273	early	47.7857	14	N
TPP1	0.014074	late	67.7778	9	N
PAFAH1B3	0.0140951	late	66.5	10	N
N4BP2L2	0.0141135	early	48.5	16	N
CEP104	0.0142534	late	74.3333	3	N
GAD1	0.0143505	early	38.6	5	N
OSTC	0.0143794	early	40.25	4	N
FAM211A	0.0147445	early	38.5	4	N
EIF2AK2	0.0148675	early	47.3333	9	N
ARHGDIA	0.0149133	late	69.8333	6	N
F8	0.0149223	late	64.9091	11	N
OR4K1	0.015101	late	70.4	5	N
ACIN1	0.0153588	late	62.5278	36	N
ZBTB48	0.0154935	late	66.0769	13	N
GPR35	0.0155928	early	46.7778	9	N
TFCP2L1	0.0157048	late	67.7143	7	N
TLL2	0.0157572	late	63.6818	22	N
TMPRSS13	0.0158221	early	37	3	N
TET2	0.0159021	late	64.1818	22	N
HPCAL1	0.0159846	early	41.25	4	N
ACTN2	0.0159881	late	64.5	14	N
ITGB3	0.0161941	early	50.3077	13	N
INTS4	0.0162075	late	64.2857	21	N
GLMN	0.0162437	early	50.5625	16	N
DENND4C	0.01626	late	70.5	4	N
BZW2	0.0163041	late	70.6	5	N
PTGS1	0.0164039	early	42.4	5	N
SLC10A4	0.0164414	early	45.2	5	N
ABHD14A	0.0164833	early	43.6667	6	N
TMEM8C	0.0165722	early	36	3	N
CAMK2B	0.016709	late	69.4286	7	N
CRHR1	0.0167818	early	46.3333	9	N
TNFRSF25	0.0168346	early	39.6667	3	N
TTC32	0.0169524	early	39.75	4	N
FAM135A	0.0172054	early	49.8125	16	N
ZNF365	0.017257	late	70.75	4	N
THBD	0.0173222	late	66.2222	9	N
ICAM2	0.0173537	late	68.1429	7	N
IL17RC	0.0174075	early	45.5	8	N
EPN1	0.0175283	early	50.2222	18	N
SOX14	0.0176334	early	46.2857	7	N
PALB2	0.017661	early	37.6667	3	N
SLC12A4	0.01773	late	76.6667	3	N
FAM160A2	0.0178074	late	62.6429	28	N
WNT10A	0.0178203	early	41	4	N
ZNF585B	0.0179035	early	39	3	N
DMRT3	0.017941	early	38.25	4	N
ZNF385B	0.017941	early	43.5	4	N
SKA1	0.0180206	late	69.4	5	N
PFDN2	0.0180595	late	70	6	N
SCRN3	0.0181111	early	48.4167	12	N
HSD17B8	0.0181843	early	39.6667	3	N
HSDL1	0.018198	early	42.6	5	N
KLHL30	0.0182939	late	65.8	10	N
MTMR6	0.0183346	late	69	6	N
ATP9B	0.0185321	late	63.9412	17	N
AQP5	0.0185765	early	47.125	8	N
HLA-F	0.0185766	early	37	3	N
XYLT2	0.0186852	early	43.1429	7	N
TGFBR3	0.0187897	early	46.0909	11	N
FSTL3	0.0187937	early	35	3	N
DBN1	0.0189936	late	70	5	N
POLRMT	0.0190316	early	50.1667	30	N
GBF1	0.0190381	early	52.303	33	N
OR1J4	0.0191391	late	70.5	4	N
MMP11	0.0191975	late	73	3	N
POU3F4	0.0193643	late	70.5	4	N
PDE4A	0.0194563	early	51.7407	27	N
ZCCHC24	0.0196089	late	75.3333	3	N
SHISA7	0.0198365	late	73	3	N
LRIG1	0.0198412	early	49.5455	22	N
ZIK1	0.0199425	late	67.75	8	N
HTR2A	0.019954	late	67.7143	7	N
EFCAB4B	0.0199633	early	50.4286	21	N
HYLS1	0.0201325	late	66.3636	11	N
ZNF318	0.0202743	late	63	24	N
AMZ2	0.0202968	early	39.8	5	N
AK2	0.0205332	late	72.3333	3	N
GATA3	0.0206002	early	44.8	5	N
TBX5	0.0207713	early	49.6923	13	N
NARS	0.0207817	early	48.4167	12	N
CTSZ	0.02079	late	72.3333	3	N
RASSF7	0.020966	early	46.5556	9	N
TMEM67	0.0209665	late	68.5	6	N
ATHL1	0.0210136	late	62.6897	29	N
RUSC2	0.0210249	early	51.0357	28	N
IL3RA	0.021067	early	49.6818	22	N
LRCH3	0.0211085	early	45.6667	6	N
RIN1	0.0211984	early	50.375	16	N
TBC1D13	0.021313	late	65.3636	11	N
CFP	0.0214391	late	69	5	N
RPS6	0.021473	late	65.7	10	N
MED13	0.0214858	late	61.0377	53	N
TMEM217	0.0217289	early	41.75	4	N
TMEM38A	0.0218851	early	48.2222	9	N
DOK4	0.0220401	late	67.25	8	N
TNFSF12	0.0220416	late	66.3333	9	N
CTDNEP1	0.0220536	late	72.6667	3	N
KAT8	0.0221793	late	72	3	N
YARS2	0.0224188	early	49.1111	9	N
MPND	0.0225095	early	43.5	4	N
EGFL6	0.0225708	early	45.2	5	N
RNF20	0.0228596	early	49.0667	15	N
SYNE2	0.0228776	late	61.7568	37	N
MYL4	0.0230121	early	43	4	N
HADHA	0.0231774	late	66.8889	9	N
RDH13	0.0234287	late	70	4	N
TIGD7	0.0234601	early	44.7143	7	N
MPC1	0.0236043	early	41	3	N
EPX	0.0237154	late	73.3333	3	N
MDGA2	0.0237321	early	50.5	16	N
EYS	0.0239253	early	52.6346	52	N
HIAT1	0.0239453	late	66.8889	9	N
HIST1H2BB	0.024027	late	72.25	4	N
EIF3B	0.0241527	early	50.8824	17	N
ERCC3	0.0241872	early	48.5	14	N
MMD	0.024225	late	68	6	N
BTBD18	0.024228	early	48.9333	15	N
RUVBL1	0.0242424	early	43.25	4	N
C20orf112	0.0243006	late	72	3	N
CCT5	0.0245793	early	47.6364	11	N
TMEM235	0.0248909	early	46.75	8	N
SEC14L5	0.0250274	late	63.2273	22	N
NGF	0.0251818	late	71	4	N
IL27	0.0252446	late	69.6	5	N
AKR1C4	0.0252959	early	41.3333	3	N
FIGF	0.0253244	early	40.25	4	N
PDGFRA	0.02535	early	47.75	8	N
C20orf26	0.0253666	early	34	3	N
HIGD1A	0.0253666	late	72.6667	3	N
TRPM6	0.0254003	late	62.2121	33	N
FNBP1L	0.0254381	early	45	6	N
CCNA2	0.0255007	early	46	5	N
ARHGEF15	0.02552	early	51.2222	18	N
MYO5C	0.0255323	early	38	3	N
MUTYH	0.0256277	late	66.1	10	N
PAQR7	0.0257356	early	44.5	4	N
PCDHA3	0.0257468	late	75	3	N
ABHD16B	0.0257591	early	45	5	N
CDC6	0.0258148	early	45.8	5	N
ZNF700	0.02599	early	48.6667	9	N
ZNF569	0.0260984	early	45.8333	6	N
PANK1	0.0261901	early	46	7	N
EIF5	0.026208	early	47.6	10	N
SLC39A3	0.0262482	late	65	11	N
GPR148	0.0262747	early	49	10	N
ESRP1	0.0263757	late	63.875	16	N
LRFN4	0.0265542	late	73.75	4	N
USP45	0.0266371	early	48.5	10	N
TTC9C	0.0266694	early	40	3	N
SPTLC2	0.0267196	early	44.8	5	N
LOX	0.0267891	early	44.5	4	N
SEMA3G	0.026908	early	50.8571	21	N
TTLL5	0.0270718	early	51.96	25	N
ZNF333	0.0270997	early	49.1	10	N
BTBD8	0.0271046	late	69.4	5	N
KCNJ6	0.0271785	early	47	6	N
SEC16A	0.027309	late	65.6364	11	N
GSR	0.0274455	late	67.5	6	N
MAP7D1	0.0274826	late	70	4	N
PPARD	0.027621	early	48.4444	9	N
RPS6KA4	0.0276219	late	67.4286	7	N
PNPLA6	0.0278314	early	52.9375	32	N
WNT10B	0.0278864	early	48	9	N
RGSL1	0.0279943	early	52.5333	30	N
MAPK4	0.0283659	late	71.3333	3	N
TDP1	0.0286269	late	73.6667	3	N
KIAA1432	0.0288328	early	46.3333	9	N
WDR87	0.0288916	late	60.6119	67	N
GRHL1	0.0289585	early	49.1875	16	N
SKIV2L	0.0290399	early	48.8333	12	N
IRF2BPL	0.0291024	late	69	5	N
FAM111A	0.0291643	early	42.2	5	N
WDTC1	0.0292683	late	66.3	10	N
SMPD1	0.0292799	late	65.6667	12	N
ZNF462	0.0295003	early	53.963	54	N
ELF2	0.029559	early	46.2857	7	N
NDST4	0.0298824	late	64.4	15	N
MMP24	0.0299639	late	66.3333	9	N
MCOLN1	0.0299828	late	63.5833	12	N
KLHL9	0.0300746	late	67.8571	7	N
DHX37	0.0301383	early	50.4286	14	N
CTAGE5	0.0301545	late	72.6667	3	N
GALNT10	0.0303425	early	49.0476	21	N
TIMP4	0.0303661	early	44	4	N
FADS1	0.0303823	late	68.8	5	N
NUP214	0.0304572	late	67.3333	6	N
ABHD17A	0.0304941	late	68.75	8	N
RMDN2	0.0305071	early	46.2857	7	N
ZDHHC24	0.0305966	early	45.8	5	N
ITGAM	0.0312265	late	65.6	10	N
TLN1	0.0312353	early	53.5614	57	N
YTHDC1	0.0312436	early	51.1364	22	N
BCL2L2-PABPN1	0.0314094	late	71.3333	3	N
ESRRB	0.0314626	late	68.5714	7	N
CC2D1B	0.0314904	early	51.3333	15	N
HSPA2	0.0315375	late	65.6	10	N
NSA2	0.0315375	late	65	10	N
CCDC115	0.0315557	early	39.5	4	N
ANKDD1A	0.0318663	late	72.6667	3	N
WBP1	0.0320249	early	47.7	10	N
RTL1	0.0320261	early	52.04	25	N
FBXO5	0.0322533	late	69	4	N
MAGT1	0.0322708	late	73.3333	3	N
APOH	0.0323036	early	45.25	4	N
CYP46A1	0.032354	early	41	4	N
OR10Z1	0.0324039	late	68.8	5	N
CCDC6	0.0324054	early	46	6	N
KLHL13	0.0324628	late	67.8571	7	N
CDK1	0.0324717	early	46	5	N
BTBD10	0.0325816	early	45.25	4	N
PCBP2	0.0327384	late	71	3	N
SPOCK3	0.0327972	late	72.3333	3	N
KIF2B	0.032838	early	47.9167	12	N
OR5P3	0.0328767	early	48	8	N
NRCAM	0.0328924	early	48.9231	13	N
ZNF730	0.0329052	late	66.1429	7	N
RIPK4	0.0329514	early	52.25	24	N
H2AFJ	0.0329743	early	41.6667	3	N
TRIM15	0.0330039	early	41	3	N
LINGO2	0.0332401	early	47.75	8	N
PIEZO1	0.0332686	early	55.0543	129	N
BPNT1	0.0332726	early	42.5	4	N
USP8	0.0333498	early	45.375	8	N
CNTN2	0.0333692	late	63.875	16	N
HCAR3	0.0334674	late	66	9	N
GAP43	0.0335106	late	72	3	N
TMED6	0.0335406	early	40.6667	3	N
ZNF208	0.0335578	late	71	4	N
PBX4	0.0336308	early	41.3333	3	N
SELL	0.0336845	early	38.8333	6	N
SREK1IP1	0.0336881	early	43.25	4	N
CRTAM	0.0338722	early	41.3333	3	N
PCMTD2	0.0338974	late	69.75	4	N
AMHR2	0.0339553	early	49.8889	9	N
PCYT1B	0.0341152	early	42	3	N
ZNF219	0.0341778	late	67.1667	6	N
HIST3H2A	0.0341871	late	69.5	4	N
PACSIN2	0.0342349	late	64.5625	16	N
CCDC22	0.0342576	late	65.8182	11	N
ARMC4	0.034347	early	49.1429	14	N
GNPDA2	0.0344257	late	69.25	4	N
TMC6	0.0344602	early	51.92	25	N
DUSP23	0.0346981	late	71.3333	3	N
NAB2	0.0347192	late	69.25	4	N
FEM1C	0.0347909	early	40.6667	3	N
NFIL3	0.0350726	early	47.8333	6	N
MALSU1	0.03515	late	70.25	4	N
TNIP3	0.0353431	early	48.3636	11	N
SPNS3	0.0355499	early	52.697	33	N
MTO1	0.0357225	late	65.2727	11	N
SMG7	0.0357343	early	50.7692	13	N
ITGA3	0.0358485	late	70	5	N
CLCN2	0.0358718	early	50.1538	13	N
DCLRE1A	0.0359471	early	45.6	5	N
ADSSL1	0.0361202	late	68.4	5	N
COL23A1	0.0361448	early	43	3	N
GALNT13	0.036145	early	43	5	N
MSRB2	0.036273	early	40.3333	3	N
ACOT6	0.0363861	early	44.5	4	N
KCNK17	0.0365302	late	66.25	8	N
CARS	0.0366268	early	49.2727	11	N
MST1	0.0366689	early	47.625	8	N
CUZD1	0.0366923	early	40.6667	3	N
RNF148	0.0367484	late	66.75	8	N
LSM14B	0.0368082	late	65.75	8	N
PRKG1	0.0368134	early	49.2727	11	N
DNAJC2	0.0370603	late	67.4286	7	N
RBFOX3	0.0371032	late	67.4286	7	N
TDRD6	0.0371849	early	49.6667	12	N
NUDT16L1	0.0372105	late	67	7	N
PCDH19	0.0372874	early	50.7692	13	N
PELI3	0.0373181	early	47.4286	7	N
TICAM2	0.0374872	late	69.75	4	N
FAM181A	0.0375426	late	63.1429	21	N
ANXA11	0.0376392	late	63.8333	18	Y
IP6K2	0.0376741	late	62.9286	14	N
IL22RA2	0.0377166	early	45.25	4	N
NFS1	0.0377231	late	63.6667	15	N
TAF6L	0.0379486	late	66.6667	6	N
THSD7A	0.0380129	early	47	7	N
POPDC2	0.0380338	late	69.5	4	N
CCDC14	0.0380431	early	44.8333	6	N
PTRF	0.0380753	early	43	3	N
SBF1	0.0381604	late	60.058	69	N
MAGEA4	0.038353	late	62.5455	11	N
ARL13A	0.0383774	early	41.3333	3	N
NAPRT1	0.0384623	early	47	5	N
DCTN4	0.0384653	early	49.2857	14	N
NDC80	0.0384748	early	47.5714	7	N
LRP5	0.0385096	late	61.5455	33	N
LECT1	0.0387409	early	47.4286	7	N
BTNL8	0.0389928	late	66	8	N
PAK7	0.0390086	early	47.6	10	N
LIG3	0.0390667	early	49.3333	15	N
GREB1L	0.0391731	early	53.5	40	N
SLIT2	0.039337	early	52.0435	23	N
TRIM36	0.0396165	early	46.7143	7	N
UBOX5	0.0396562	early	47.3333	9	N
OR5A2	0.039681	late	68.6	5	N
NIPSNAP3A	0.0396845	early	45.25	4	N
BEGAIN	0.03971	early	42.3333	3	N
PRKD1	0.0397304	early	49.4667	15	N
FAN1	0.0397669	early	50.7143	14	N
LACTB2	0.0398047	late	70.5	4	N
HERC1	0.0398375	early	54.7889	90	N
FARS2	0.039912	late	64.1429	14	N
TNRC18	0.0399387	late	59.9091	66	N
AHCYL2	0.0400313	late	68.8	5	N
RBM27	0.0400764	early	51	13	N
TMX3	0.0401979	early	45	6	N
TRH	0.0402278	late	69.5	4	N
ANKZF1	0.0403025	late	67.4	5	N
BRI3	0.040303	late	72.6667	3	N
ATP9A	0.0403053	late	63.35	20	N
PPP1R3G	0.040357	late	68.8	5	N
MAP3K10	0.0403575	late	66.7	10	N
ISOC1	0.0404713	early	46	6	N
HOXB1	0.0405025	early	48.125	8	N
CAPRIN1	0.0406708	late	66.8571	7	N
SSTR1	0.0410197	late	66.5714	7	N
LCN9	0.0410733	early	47.3333	6	N
VPS36	0.0410855	early	44.25	4	N
KLF3	0.0410989	early	49.1111	9	N
POU2F3	0.0413679	early	41.3333	3	N
TMEFF2	0.0414025	early	47.5	6	N
RNF186	0.041438	late	63.7857	14	N
CACNB1	0.041489	early	44.25	4	N
CPNE2	0.0415124	late	66.2857	7	N
BTRC	0.0415685	early	51.6	15	N
EIF2AK1	0.0415874	late	64.9	10	N
CTH	0.0416193	late	63.3529	17	N
GPR137	0.0418856	late	61.4286	28	N
EYA2	0.0420361	late	65.5556	9	N
NRM	0.0420546	early	43	3	N
IL20	0.042091	early	42.3333	3	N
CA7	0.0423832	early	43.6667	3	N
ST3GAL1	0.0423832	early	43.6667	3	N
MYO10	0.0423935	late	60.74	50	N
SIN3A	0.042421	early	50.8889	18	N
DVL2	0.0425297	early	50.0909	11	N
FAM132A	0.0425575	early	46.6	5	N
MBTPS2	0.0425575	late	69	5	N
TRAPPC9	0.0425962	late	60.7857	42	N
AIM2	0.0426238	late	70.5	4	N
C19orf59	0.0426771	late	71	3	N
ZCCHC14	0.042705	early	52.6667	33	N
TKT	0.0427828	early	50.6818	22	N
MAMSTR	0.0429005	early	47.6	5	N
PTPRD	0.0430098	early	51.871	31	N
NDRG1	0.0430318	late	65.1818	11	N
CTSB	0.0432544	early	50.2632	19	N
PLXNA4	0.0432728	early	53.6154	52	N
C7	0.0433585	early	52.15	20	N
CCDC180	0.0434277	early	49.7143	14	N
DNTTIP1	0.0436166	early	48.5556	9	N
LRRC14B	0.0437521	late	69.25	4	N
PEX10	0.0437521	late	69.5	4	N
ADAMTS1	0.0439301	early	47.6667	6	N
CDH24	0.0439594	early	49.8462	13	N
DDX5	0.0440373	late	64	12	N
SMYD1	0.0442329	early	47.8462	13	N
HRC	0.0442664	early	45	5	N
PLSCR1	0.0443422	early	46	4	N
ZNF431	0.0444139	late	70	5	N
RUNDC3A	0.044473	late	67.4	5	N
TSPAN14	0.0444941	late	67	6	N
FBXW7	0.0447484	early	49.6364	11	N
TAF1L	0.0449185	late	62.5217	23	N
NPHP3	0.0451543	early	47.8571	7	N
CHRNA3	0.0452994	early	48.9286	14	N
IFNA14	0.0453142	early	49.4444	9	N
HS6ST2	0.0453232	late	70.3333	3	N
VWA3B	0.0453374	late	67.6	5	N
KLC4	0.0453454	late	62.7895	19	N
UNC79	0.045355	early	54.5082	61	N
LILRA4	0.0454785	early	42.3333	3	N
LGR4	0.0458469	early	52.1739	23	N
CDH26	0.0459774	early	47.875	8	N
ZNF414	0.0460691	early	48.4	10	N
KCTD13	0.0461243	early	47.4	5	N
LRTOMT	0.046332	early	50.5	18	N
ARPC2	0.0464593	early	42.3333	3	N
PIGX	0.046513	early	46.8571	7	N
FAM105A	0.046565	early	47.4286	7	N
MOK	0.0465672	late	65.4	10	N
LZTS2	0.0465699	early	50.375	16	N
CYP1A1	0.0467066	late	69	5	N
RORB	0.0467355	early	43.5	4	N
PRKACA	0.0467699	early	45	4	N
ABCA1	0.046796	late	60.5532	47	N
CYP11B1	0.0468721	early	52.0833	24	N
RBMS3	0.0470563	early	41.6667	3	N
SRBD1	0.0471441	late	65.625	8	N
SPATA13	0.0471444	early	53.3158	38	N
PON2	0.0471852	late	69.25	4	N
L1TD1	0.0471983	late	62.3529	17	N
PCDHGA5	0.0472676	late	65.6	10	N
INO80	0.0472973	late	61.5278	36	N
KLF1	0.0473773	early	43.3333	3	N
ZC3H4	0.0473867	late	60.7647	34	N
SNX8	0.0474198	late	67.8	5	N
GLS	0.0475347	early	47.8571	7	N
DHX58	0.0475561	early	47.1429	14	N
ZNF710	0.0476021	late	64.0833	12	N
LRRTM1	0.0476637	late	66.5	6	N
AHCYL1	0.047814	late	68.25	4	N
ABI3BP	0.0478356	late	65.7778	9	N
SH3BP4	0.0478942	late	63.7143	14	N
SERPINC1	0.0482054	early	47.2	5	N
C9	0.04829	early	48.1	10	N
LEO1	0.0483638	late	69.4	5	N
ENAM	0.048459	early	44.8	5	N
IGF1R	0.048485	early	52.7407	27	N
ZNF442	0.0485001	late	63.7143	14	N
DSC2	0.0485786	early	49.5333	15	N
AADACL3	0.0486819	early	46	5	N
ORC1	0.0487458	early	46.2	5	N
SAMD15	0.0487622	late	70.3333	3	N
ZSCAN23	0.0488901	early	49.5	8	N
TUT1	0.0489263	early	50.7692	13	N
MT3	0.0489687	early	44.3333	3	N
TAS2R38	0.0490121	early	50.6	10	N
SNX18	0.0491609	late	65.0833	12	N
PHF21B	0.0492457	late	66.125	8	N
ENPP1	0.0492522	early	47.8571	7	N
SPIC	0.0492712	early	48.125	8	N
TMEM129	0.0493267	late	63.3636	11	N
PARP11	0.0494222	early	48.9	10	N
SCUBE3	0.0494243	early	49.625	8	N
PATZ1	0.0494906	early	50.6471	17	N
LRRC16A	0.0496731	early	53.0732	41	N
TPSG1	0.0496763	early	44	3	N
NUP62	0.0496794	early	46.2	5	N
PDILT	0.0497445	late	66.4286	7	N
ZNF416	0.0497601	early	38.3333	3	N
MAB21L2	0.0501488	early	47.1667	6	N
UBE4A	0.0502049	late	65.2	10	N
NDUFAF3	0.0502232	late	70	3	N
RNF219	0.0503282	early	48.6667	6	N
OR2M7	0.0503501	late	71.6667	3	N
SPIRE2	0.0503582	late	66.6667	6	N
CYP2B6	0.0505102	early	46.75	4	N
MEST	0.0505198	late	72.3333	3	N
BUD13	0.0508183	late	64.7778	9	N
ZNF582	0.0509376	early	51.4545	11	N
COL13A1	0.0509509	late	64.7	10	N
TRPM7	0.0510582	late	60.9574	47	N
B4GALNT4	0.0511365	early	52.5556	18	N
SUZ12	0.0513386	late	65.8889	9	N
MRPL36	0.0514254	early	47.5	8	N
LPIN2	0.0514631	early	49.7778	9	N
FUBP1	0.0515046	late	72	3	N
MAPK10	0.0515477	late	70.3333	3	N
MIS18BP1	0.0515994	early	48	6	N
PRKCH	0.0516129	early	49.4444	9	N
MINOS1	0.0516775	early	43.6667	3	N
C1QC	0.0517763	late	64	15	N
SSTR4	0.0518633	early	48	9	N
TRPA1	0.0518866	early	44.75	4	N
MYSM1	0.0519203	late	64.7	10	N
HIST1H2AH	0.0519948	late	67.6	5	N
TUBG2	0.0520157	early	48.2	10	N
ADPRHL2	0.0521349	early	51.6154	13	N
TBC1D5	0.0522156	early	49.7778	9	N
KIAA0355	0.0522748	early	52.4706	34	N
CHST15	0.0524404	late	66.5714	7	N
SLC26A5	0.0526727	early	47.6	5	N
CSMD3	0.0527455	early	53.6905	42	N
INTS3	0.0528083	early	48.6	10	N
ZNF43	0.0529489	late	69	4	N
DRD2	0.0529517	early	50.2222	9	N
NAE1	0.0529841	late	64.3636	11	N
GPATCH2L	0.0531351	late	64.3333	12	N
ZNF679	0.0531669	early	48.75	8	N
ATAD2	0.0532292	early	51.963	27	N
NXPE2	0.0534242	early	50.6667	12	N
SLC35F2	0.0534868	late	68.5	4	N
GCOM1	0.0535116	early	49.4286	7	N
SLC4A1	0.0537112	early	50.7143	21	N
PCDHA2	0.0537778	early	46.6667	6	N
ADCY6	0.0538219	late	61.75	24	N
AKAP7	0.0538351	early	44.6667	3	N
APLP2	0.0539463	late	67.2	5	N
DBT	0.0540316	early	47	6	N
MORN2	0.0541371	late	64.6667	9	N
LRTM1	0.0541944	early	44.6667	3	N
KIF1A	0.0542716	late	60.5745	47	N
CARD17	0.0543299	late	67.6	5	N
ZG16	0.0544844	early	48.25	8	N
MFSD12	0.0544979	early	46	4	N
DR1	0.0545422	late	69.6667	6	N
SCN11A	0.0545782	late	61.2308	26	N
FGF19	0.0546464	early	42.3333	3	N
SSUH2	0.0546992	early	51.4706	17	N
TARS	0.0547983	early	51.25	12	N
HTRA4	0.0548214	early	47	5	N
CCND2	0.0548389	early	46.7143	7	N
FSTL4	0.0549426	late	63.1429	14	N
ZNF148	0.0550331	late	68.8	5	N
RPL4	0.0551675	late	66	7	N
OR52E2	0.0551975	late	65.5714	7	N
ATG14	0.0552552	late	63.8333	12	N
PCOLCE	0.0552972	early	48.6	10	N
UGT2A3	0.0553381	late	64.2727	11	N
IKBIP	0.055348	early	48.1667	6	N
ADAR	0.0553665	late	62.2	20	N
CCL16	0.055376	early	39	3	N
PTBP1	0.0555466	early	48.25	8	N
KIAA1147	0.0556745	early	50.6364	11	N
SOX6	0.0558503	late	63.5385	13	N
EHD1	0.0558578	early	51.5556	18	N
PHGDH	0.0559139	late	64.375	8	N
FAM9A	0.0559242	early	47	4	N
OR4D9	0.0560369	early	50.5556	9	N
POLQ	0.0560468	late	62.3	20	N
ASPA	0.0560674	late	69.6667	3	N
TMEM159	0.0560674	late	69.6667	3	N
LMCD1	0.056098	early	49.1667	6	N
TMEM45B	0.0562622	late	67	6	N
PLEK2	0.0562833	early	49.5	8	N
ZNF565	0.0563414	early	50.25	12	N
RASIP1	0.0563763	early	48.8571	7	N
EPHB1	0.0564988	late	62	22	N
DHTKD1	0.0566675	early	51.1	10	N
PDZD3	0.0566695	early	49	11	N
BTBD3	0.0568244	early	45.8	5	N
NFATC3	0.0570142	early	42.25	4	N
PITPNM2	0.0572495	early	50.9333	15	N
METTL10	0.057298	early	48	5	N
DYRK1A	0.0573328	late	63	16	N
TMPRSS4	0.0573613	late	65.6667	9	N
ABCE1	0.0575665	early	43	3	N
MTMR2	0.0576278	late	68.2	5	N
MCAT	0.0576685	late	70	4	N
TMEM185B	0.0577002	late	65.1429	7	N
UBE3A	0.057752	early	48.75	8	N
SGSM1	0.0578205	early	53.9429	35	N
TNFRSF4	0.057831	early	50.2	10	N
ECE2	0.0579117	late	62.3333	18	N
TSHZ1	0.0580568	late	60.4474	38	N
SEC24B	0.0580628	early	53.3548	31	N
ARR3	0.0581372	late	70.6667	3	N
DISC1	0.0582327	late	69.6667	3	N
SLC30A6	0.0582721	late	62.5238	21	N
LRRC48	0.0582778	late	66.75	8	N
MAGEC1	0.0585639	late	61.7407	27	N
LRRC70	0.0586703	late	64.7	10	N
RIPK2	0.0587022	late	65.7143	7	N
BTN2A2	0.0587759	early	47.6	5	N
NBL1	0.0587759	late	66.8	5	N
CUL3	0.0588077	early	48.875	8	N
MYL2	0.0588284	early	46.25	4	N
SFMBT1	0.0588489	early	50.2308	13	N
ALDH1A1	0.0588565	early	50.5	12	N
ZNF280C	0.0588755	early	46.6667	6	N
GBP2	0.0589347	early	48.9	10	N
TCERG1	0.0589804	early	51.7059	17	N
AFTPH	0.0590503	early	45	3	N
RIN2	0.059104	early	48.5714	14	N
RPL23	0.0591471	early	44.6667	3	N
TNK1	0.0592721	late	65.2857	7	N
SOD1	0.0593116	early	52.1935	31	Y
AMFR	0.0593735	early	46.25	4	N
NR5A1	0.0593827	late	64.4444	9	N
ITIH2	0.0594239	late	66.1667	6	N
OGFR	0.0594378	early	50.6364	11	N
GPR142	0.059467	early	49.7778	9	N
MPLKIP	0.059487	early	43.3333	3	N
PHKA1	0.059526	early	51.6	15	N
ZNF496	0.0596803	early	53.0385	26	N
MOV10	0.0597227	early	51.1333	15	N
FAM98A	0.0597596	early	50.125	8	N
ALS2CL	0.0598285	late	70.3333	3	N
RCE1	0.0598291	early	46.4	5	N
RBFA	0.0598466	early	50.2857	7	N
GTF2H1	0.059867	late	68.2	5	N
TRERF1	0.0599551	late	60.95	40	N
CCDC148	0.0600533	early	50.8571	14	N
PPP5C	0.0601978	early	49.6667	12	N
CNOT8	0.0602202	early	47	4	N
WDR66	0.0602564	early	49.7273	11	N
MANBA	0.0602628	early	44.5	4	N
GLRB	0.0602704	early	47.625	8	N
AFG3L2	0.0603055	late	68	4	N
STEAP3	0.0603192	late	71.3333	3	N
ZNF75A	0.0604214	early	50.6154	13	N
RNF6	0.0604926	late	63.3846	13	N
SWAP70	0.0606198	late	66	7	N
MMEL1	0.0607826	late	67.4	5	N
ADAMTS14	0.0608193	late	61.0312	32	N
MGAT5	0.0608246	early	50	11	N
SNX14	0.060883	early	51.1875	16	N
ZNF7	0.0608975	late	63.4615	13	N
ZNF574	0.0609165	late	63	18	N
TMEM86A	0.0609461	late	63.0714	14	N
MFSD4	0.0609978	early	50.125	8	N
WDR60	0.0611167	late	65.4444	9	N
MYH13	0.0611296	early	48.8333	6	N
CASQ2	0.0612496	late	70.25	4	N
NAALAD2	0.0612928	late	65.0909	11	N
HPGDS	0.0613106	early	44.3333	3	N
TNNT1	0.0616307	late	66	7	N
TRPS1	0.0616709	early	48.625	8	N
SHPRH	0.061816	early	50.6111	18	N
SLITRK1	0.0619084	early	50.6	10	N
COL1A2	0.0620219	late	61.875	24	N
TP53BP1	0.0620747	early	43.75	4	N
COL3A1	0.0621114	early	52.6667	24	N
CCDC149	0.0621865	late	63	16	N
SNX27	0.0623737	late	66.8	5	N
CRISPLD1	0.062381	late	67.5	4	N
PCDH17	0.0624893	early	45	7	N
CSF2RB	0.0627211	late	71.3333	3	N
TRIM40	0.0627276	early	46.6	5	N
CHORDC1	0.062767	late	68.4	5	N
FN3KRP	0.062767	late	67.4	5	N
SLC41A2	0.0628217	early	50.1818	11	N
ARF1	0.0629758	late	70	3	N
ZNF485	0.0629816	early	51	11	N
ZKSCAN2	0.0630617	early	49.7273	11	N
OR2M5	0.0630669	late	64.75	8	N
POLR2B	0.0630669	late	64.125	8	N
SHC3	0.0631565	early	49.5714	7	N
HECW2	0.0631807	late	62.0455	22	N
CEACAM19	0.0633094	late	67	6	N
CPT1B	0.0635905	late	69	3	N
ZNF605	0.0636934	early	45	3	N
SLC5A9	0.0637527	late	67.75	4	N
PHKA2	0.0638363	late	61.64	25	N
SCUBE1	0.0639018	late	61.4444	27	N
SLC6A17	0.0640979	late	63.5	14	N
NME8	0.0641112	late	66.8333	6	N
MROH1	0.0641344	early	52.6364	22	N
CCDC50	0.0643005	late	64	11	N
PYURF	0.0643139	early	41	3	N
GTF3C3	0.0643474	early	48.7	10	N
SEMA3C	0.0643625	early	52	14	N
TRIM39	0.0644178	early	40	3	N
RBM17	0.0644699	early	49	9	N
HHLA2	0.0645621	early	46.4	5	N
CUL2	0.0645902	early	48.6667	9	N
PLIN2	0.0647304	late	69.3333	3	N
EQTN	0.0649954	late	67.3333	6	N
PRR23A	0.0650129	early	43.5	4	N
GPR139	0.0651438	late	66.6667	6	N
RPUSD2	0.065149	early	44.6667	3	N
TRAPPC2L	0.0652919	late	68.8	5	N
NEK6	0.0654041	late	67	6	N
TCF12	0.0655032	early	52	14	N
HRH2	0.0655808	late	65.375	8	N
OTUD7A	0.0655905	late	67	6	N
CAMK2G	0.0656072	early	48	7	N
FASTKD5	0.0656759	early	51.6667	18	N
NNMT	0.0657812	early	43.3333	3	N
SAP30BP	0.0657812	early	45	3	N
EBP	0.0658338	late	67.25	4	N
TNFRSF11B	0.0658724	early	50.25	8	N
UTP20	0.0660992	early	42.6667	3	N
ZNF827	0.0663352	late	61.5357	28	N
SLC7A5	0.0665425	early	49.7	10	N
SYNDIG1L	0.0665785	late	69.3333	3	N
SLC25A19	0.0667183	late	67.1667	6	N
SKIL	0.0667183	early	49	10	N
SGOL2	0.0667925	late	70.6667	3	N
IYD	0.0668192	early	48.875	8	N
PRDM4	0.0669533	late	70	3	N
ZXDB	0.0671145	late	71	3	N
KCNIP2	0.0672221	early	40.3333	3	N
BRWD1	0.067272	late	60.3469	49	N
C1orf168	0.0674918	early	43	3	N
PHACTR4	0.0676458	early	51.5556	18	N
JMJD7	0.0679251	early	38.6667	3	N
TPP2	0.0681034	late	63.6667	12	N
LRRN3	0.068348	early	46.25	4	N
CREB1	0.0684063	early	43.8	5	N
ZFP3	0.0684778	late	64.625	8	N
APOBEC3C	0.0685793	early	45.6667	3	N
SLCO3A1	0.0686285	early	51.3158	19	N
TEAD4	0.0686947	late	62.6429	14	N
DPYSL2	0.0687463	late	65.375	8	N
NSMAF	0.0689193	late	64.6	10	N
CFLAR	0.068983	early	49.5	6	N
CYTH4	0.0690513	early	51.1429	14	N
RBM42	0.0690701	early	50.6	10	N
FUBP3	0.0690905	early	51.1667	12	N
HIPK1	0.0692764	late	61.2581	31	N
EML3	0.069296	late	63.6	15	N
ARL6IP1	0.069514	early	47.8	5	N
RPL3	0.0695587	late	64.7778	9	N
FNDC7	0.0696154	early	49.7	10	N
WDR86	0.0697467	early	52.4118	17	N
KLF12	0.069755	early	49.8333	12	N
ITPRIP	0.0698657	late	65.4286	7	N
NET1	0.0699115	early	48.5556	9	N
CR1L	0.0700844	early	48.7143	7	N
BMI1	0.0701818	late	69	3	N
BCAT1	0.0703494	late	68.6667	3	N
IKZF2	0.0703626	early	49	9	N
NRXN3	0.0706395	late	63	17	N
OR8J3	0.0707415	late	69.6667	3	N
ZMIZ2	0.0709262	early	52.8214	28	N
NSDHL	0.0710388	early	47.1429	7	N
USP19	0.0711314	early	52.6154	26	N
C19orf10	0.0712033	late	66.8	5	N
CD36	0.0713964	early	48.9	10	N
EFTUD2	0.0713964	late	64.5	10	N
GPR85	0.0715312	early	45.3333	3	N
PCBP3	0.0715506	late	66.8333	6	N
ZNF34	0.0715827	late	63.8	10	N
LARP4B	0.0716749	early	52.0625	16	N
UTP23	0.0717058	early	49.4286	7	N
IKZF5	0.0720712	early	49.25	8	N
FBXW10	0.0723199	late	63.8462	13	N
DIDO1	0.0723905	late	61.9545	22	N
EXOSC3	0.0724529	early	48.2857	7	N
POLD2	0.0724998	early	40	3	N
ASAP3	0.0725254	late	66.6	5	N
ATP6V1B1	0.0726718	early	45.3333	3	N
WWP1	0.0727305	early	50.7273	11	N
FAM86A	0.0729653	late	65.5	6	N
CNGB1	0.0729706	early	48.4	5	N
TRPC3	0.0729796	early	48.1429	7	N
RPIA	0.0730153	late	66.2	5	N
DCAKD	0.0731122	early	44.5	4	N
NPTN	0.0732622	late	67.25	4	N
PPOX	0.0733055	late	69	3	N
GNAT1	0.0734125	early	44	4	N
FBXL12	0.0734791	early	45.6667	3	N
COL6A1	0.0734847	late	63.6364	11	N
HRG	0.0735001	late	65.3	10	N
TTC4	0.0735156	early	48.875	8	N
SHQ1	0.0735527	late	67.2	5	N
OR8B3	0.073595	early	43.3333	3	N
TSSC1	0.0736226	late	63.0769	13	N
CTNNB1	0.0736875	early	47.2	5	N
H2AFY2	0.0736886	early	50.8889	9	N
CAPZA1	0.0736994	late	66.2857	7	N
PITPNC1	0.0737429	early	49.5	6	N
TSPAN4	0.0737557	late	63.8889	9	N
GLS2	0.0739074	early	49	6	N
MFSD10	0.0739436	late	70.6667	3	N
ENTPD3	0.0740019	early	46	3	N
KLHL8	0.0740099	late	64.4	10	N
SORBS1	0.0740143	early	51	13	N
NFATC1	0.0743148	late	61.36	25	N
KDM2B	0.0744617	early	52.7407	27	N
LPPR4	0.0744715	early	47.5	4	N
ACTR10	0.0744923	late	64	13	N
PRKAA1	0.0746931	late	65.8333	6	N
MTOR	0.0747063	late	60.8056	36	N
CEP44	0.0748212	late	74	3	N
SCG5	0.074925	late	65.4286	7	N
CIB1	0.0749388	early	43	3	N
UBE2C	0.0749388	late	70	3	N
ZBTB12	0.0749836	early	48.5	8	N
CAPN11	0.0750759	early	51.4	15	N
WDR17	0.0751566	late	66.4286	7	N
PHF20L1	0.07542	early	51.6667	15	N
CD79B	0.0754541	early	50.5	8	N
PPM1D	0.0754856	late	66.3333	6	N
ITGAV	0.0755014	early	51.3571	28	N
ABCD2	0.0755556	early	52.0526	19	N
COL4A4	0.0755874	early	53.3529	34	N
CDKN3	0.0757373	early	48.8333	6	N
DEPTOR	0.0757793	early	47.6667	6	N
TRAM1L1	0.0758214	late	65.6667	6	N
WAS	0.075826	early	46	3	N
DUSP6	0.0760045	late	68.3333	3	N
KCNQ4	0.0761027	late	64.8889	9	N
ARFIP1	0.0763624	early	44.3333	3	N
KCNK4	0.0766372	early	49.4286	7	N
MYH7	0.0767775	early	53.55	40	N
TUBA3D	0.0768332	early	51.0769	13	N
PRPSAP2	0.0769387	late	67.2	5	N
TYW5	0.0769621	early	44	3	N
MGME1	0.0770433	early	47.75	4	N
TRIM56	0.0771169	early	52.7826	23	N
GALK1	0.0772633	early	44.6667	3	N
CDAN1	0.0773863	early	47.7143	7	N
SLC4A11	0.0774934	late	61.9	20	N
SLFNL1	0.077505	late	68.3333	3	N
MASP1	0.0775381	early	51.9167	12	N
UPK1B	0.0775662	late	69.25	4	N
DDX27	0.0776057	late	62.75	16	N
MGMT	0.0776469	early	50	6	N
CYLC2	0.0778687	early	46	3	N
CLEC4C	0.0778753	early	48.4	5	N
FBF1	0.0778813	early	45.75	4	N
KLHL2	0.0779023	early	47.7143	7	N
ZNF510	0.0781656	early	52.2105	19	N
CCDC34	0.0783471	early	46.8	5	N
SLC17A7	0.0785391	early	41.3333	3	N
LRG1	0.0786787	early	49.2	5	N
ANAPC2	0.0788362	early	52.4167	24	N
RAP1GAP2	0.0788846	late	60.9048	21	N
PDGFC	0.0788862	late	67	4	N
RPA3	0.0790296	late	73	3	N
PDX1	0.0792027	early	48.8333	6	N
PUSL1	0.0792757	late	69	3	N
KIAA0408	0.0794608	late	68.3333	3	N
LYRM7	0.0794608	late	68.6667	3	N
SP7	0.0795081	early	50	6	N
RYR3	0.0795287	early	54.9904	104	N
U2AF1	0.0795955	early	47	6	N
ASPM	0.0796383	late	61.3077	26	N
CALB1	0.0796462	late	69	3	N
MCAM	0.0796462	late	69	3	N
ZNF846	0.0796525	early	51.75	12	N
CMTM3	0.0797268	early	49	6	N
BAG2	0.07977	early	46.3333	3	N
LRRC56	0.079979	late	62.4211	19	N
ALDH1B1	0.080018	early	46.3333	3	N
SLC25A22	0.0800351	late	65	7	N
RPS3A	0.0800629	late	67.75	4	N
ENOPH1	0.0801218	late	65.3333	6	N
ZNF346	0.0802667	late	69.6667	3	N
PIN1	0.0803913	early	46.3333	3	N
ESYT3	0.0805245	early	49.4286	7	N
DCAF11	0.0805784	early	41.6667	3	N
BOC	0.0807875	early	51.7692	13	N
ZC3H11A	0.0808938	late	61.5556	18	N
GPR114	0.0811824	early	51	12	N
IARS2	0.0812677	early	44.6667	3	N
AXL	0.081339	late	59.9655	29	N
C9orf3	0.0814517	early	51.1111	9	N
LILRB4	0.081581	late	68.25	4	N
S1PR4	0.0816266	early	53.48	25	N
PNKD	0.081715	early	49	5	N
GSG1L	0.081764	late	66.6	5	N
ALAS2	0.0821207	late	66.3333	6	N
PLVAP	0.0821208	late	62.6667	15	N
ZNF667	0.0821308	early	51.5833	12	N
DDX53	0.0822104	late	65.3333	6	N
THNSL2	0.0822788	early	45.6667	3	N
NUP85	0.0823484	late	62.6	15	N
POU5F1B	0.0823746	early	48.75	8	N
IGFL2	0.082459	late	66.75	4	N
EHHADH	0.0825066	early	48	7	N
GSTA1	0.0826721	late	62.8333	12	N
NUPL1	0.0827093	late	64.1818	11	N
ARL2	0.082765	late	66	8	N
ODF2L	0.0828041	early	50.25	8	N
NCOA1	0.0830778	early	53.4	30	N
SLC10A2	0.0831176	late	65	8	N
TTC14	0.0831522	late	64.3333	12	N
SIRT3	0.0832031	early	49.5	6	N
NDUFAF5	0.0834703	early	49	7	N
CADPS2	0.0836601	late	65.3333	9	N
LRPAP1	0.0838076	late	65.4286	7	N
OSGEPL1	0.0838415	late	66.6	5	N
TM4SF20	0.0839578	early	48	4	N
PPIL4	0.0840728	early	35.6667	3	N
ADORA1	0.0842225	early	49.5	8	N
RGPD4	0.0842971	early	46.6667	6	N
MED1	0.0843418	late	61.875	24	N
NDUFS6	0.08435	late	67.25	4	N
TEX10	0.084493	early	51.9286	14	N
MTFR2	0.0845801	early	49.875	8	N
PNPLA7	0.084638	late	60.4118	51	N
TERF1	0.08482	late	64	9	N
POLD1	0.0848442	late	62.2273	22	N
ABCB5	0.0848564	early	46	4	N
PPARA	0.0849115	early	49.1429	7	N
RABGGTA	0.0850823	early	45.5	4	N
SNX16	0.0853564	early	47.3333	6	N
SATB1	0.0853793	early	50.625	8	N
SEC14L6	0.0853858	early	51	9	N
CGNL1	0.0855967	late	65.1429	7	N
BEND5	0.0857953	early	50.5	14	N
CCNE2	0.0858597	early	48	5	N
EIF2AK4	0.0859133	early	52.1111	18	N
SPOCK2	0.0859616	late	66.6	5	N
CCHCR1	0.0859641	late	68	3	N
ENKUR	0.0859641	early	45.3333	3	N
ADRA1A	0.0860065	early	43.3333	6	N
ENPP2	0.086012	early	51.1	10	N
HACL1	0.0862213	late	64.6667	9	N
IL1RAPL2	0.0862276	early	46.3333	3	N
OR2H1	0.0862276	early	46.3333	3	N
FAM3D	0.0864099	late	63.6	10	N
TC2N	0.0866137	early	49.3333	6	N
RBP7	0.0866328	early	49.5714	7	N
UBD	0.086823	early	46.6667	3	N
INTS5	0.0869162	early	53.7838	37	N
PKD1	0.086924	early	55.3366	101	N
INTU	0.0869863	late	66.4	5	N
SLC32A1	0.086989	late	65.5	6	N
FBXO34	0.0870808	early	53.1739	23	N
H2BFM	0.0870886	late	68.3333	3	N
TCHH	0.0871027	late	62.2	25	N
RAB1A	0.0871551	early	45.3333	3	N
FOLR1	0.0872217	late	73.3333	3	N
CNTRL	0.0873223	early	46.125	8	N
ITGA10	0.0873631	late	65.125	8	N
ORMDL1	0.0873657	late	66.3333	6	N
SLC25A47	0.0873657	early	46	6	N
FBXO2	0.0874216	late	68.6667	3	N
DGKE	0.0874537	late	62.7143	14	N
SDK1	0.0874824	early	53.25	28	N
GRB7	0.0874833	early	45	4	N
RPRD1A	0.0875073	early	46.6667	6	N
ARSJ	0.0876268	early	52.1818	11	N
CD2	0.0876491	late	66.6667	6	N
TIMM22	0.0877557	early	45	3	N
TRPC4	0.0878693	early	51.7	10	N
STRA13	0.0881579	early	43.3333	3	N
ADAMTS16	0.0881717	late	62.2222	18	N
GPR156	0.0884084	early	47	6	N
MEMO1	0.0884268	late	68.3333	3	N
GPBP1	0.0884705	early	44.25	4	N
MLF1IP	0.0886114	late	64.3333	9	N
ALOX15	0.0886463	late	66.8	5	N
IRAK2	0.0886857	early	52.4375	16	N
PANK3	0.0886964	early	43.6667	3	N
PCDHB15	0.0887423	late	66.5	6	N
RBP3	0.0887563	early	52.8824	34	N
ACSM2A	0.0887626	early	48.5	4	N
FGF5	0.0888315	late	68	3	N
C1GALT1	0.0889768	early	49.2	10	N
NT5DC2	0.0890234	early	51.3333	12	N
TOR1AIP2	0.0891345	late	64.125	8	N
MAP1LC3C	0.0892228	late	65.8	5	N
C2CD3	0.0893175	early	52.7143	21	N
SF3A1	0.0893491	late	67.25	4	N
TMEM98	0.0893734	late	68.6667	3	N
ACADM	0.0893909	late	63.0625	16	N
ZNF69	0.0894413	early	45.6667	3	N
ACCSL	0.0894611	late	64.6667	6	N
MKI67	0.0894794	early	51.8125	16	N
NARF	0.0895272	early	51.0556	18	N
OSBPL1A	0.089627	late	62.3125	16	N
WIZ	0.0900089	early	52.375	24	N
INO80B	0.0900254	late	65.1429	7	N
ZBTB38	0.0900702	early	50.7143	7	N
IDUA	0.0901186	early	52.6471	17	N
ALOX5AP	0.0901228	late	68.3333	3	N
OR7G3	0.0901228	late	68.3333	3	N
NMT1	0.0902046	early	48.4286	7	N
STC1	0.0903317	early	48.6	5	N
DEFB110	0.0903966	early	45.3333	3	N
CDK11A	0.0905329	late	61.6	25	N
FGF4	0.0907693	early	46	4	N
RAD54L2	0.0908041	late	62.1379	29	N
KIAA1614	0.0908289	early	42.25	4	N
CNTFR	0.0908338	late	65.7143	7	N
SLC12A7	0.0909906	late	60.3582	67	N
RBM47	0.0910659	early	52.3684	19	N
DEFB125	0.0910675	early	46.75	4	N
DHX30	0.0912508	early	50.9091	11	N
ETFDH	0.0913981	early	48.4	5	N
NIPBL	0.0914725	late	61.6667	24	N
NUAK2	0.0916137	early	48.4444	9	N
ASL	0.0918684	late	61.5238	21	N
NIT2	0.0918942	early	50	9	N
GPN1	0.0919889	late	65.6	5	N
SYMPK	0.0920037	early	53.5263	19	N
UGDH	0.0920235	early	51.4	10	N
ZNF33B	0.0920373	early	49.75	8	N
KRTAP5-10	0.0920533	late	68.3333	3	N
HSPH1	0.0920951	early	50.7778	9	N
MYBBP1A	0.0924122	late	63.7273	11	N
FAM178A	0.0924656	late	63.0833	12	N
GPI	0.092559	early	53.1053	19	N
AZIN1	0.0926355	early	49.375	8	N
USP42	0.0927425	early	50	7	N
NDUFA4	0.0930551	early	43	4	N
RPL36AL	0.0931713	early	44.6667	3	N
CAD	0.0932021	early	54.4878	41	N
ASF1B	0.0933118	late	68.3333	3	N
GTF2A1	0.0933271	early	51.4	10	N
CRYGB	0.0933431	early	46.8	5	N
PON3	0.0933744	late	65.6667	6	N
EHF	0.0933821	early	47	3	N
NVL	0.0934014	early	52.1818	11	N
ZNRF3	0.0934469	early	50.3077	13	N
HJURP	0.09352	late	65.2	10	N
IRAK3	0.0936166	early	49	7	N
SFI1	0.093633	early	51.6667	9	N
DHX35	0.0941879	early	48.625	8	N
SPINT1	0.0942292	late	68.6667	3	N
LPCAT1	0.0942561	early	50.4	10	N
GH1	0.0943577	late	64.4286	7	N
QRICH1	0.0944052	late	63.875	8	N
DEPDC5	0.0944333	early	52.1481	27	N
ZBTB7C	0.0944487	early	49.75	8	N
SPTY2D1	0.0945044	early	52.8095	21	N
PRR21	0.0945739	late	63.8889	9	N
THBS2	0.0947014	early	53.45	20	N
IPO9	0.0947094	early	52.5	24	N
SELP	0.09473	late	64.5714	7	N
PSAP	0.0949399	late	69	3	N
RUFY1	0.0951539	early	46.6667	3	N
CAPN12	0.095315	late	61.6667	21	N
TRMT10C	0.0953683	early	46.6667	3	N
ATPAF1	0.0953869	late	66.5	4	N
PHF2	0.0954354	late	61.3846	26	N
SPATA24	0.0955637	early	50.1111	9	N
TAB2	0.0956622	early	52.25	16	N
CCDC127	0.095666	early	50.5714	7	N
FLG2	0.095686	early	47.8333	6	N
ST8SIA4	0.0957097	early	47.2	5	N
SRRM2	0.0957733	early	55.5839	149	N
FAM222B	0.0957921	late	62	18	N
NFKB1	0.0958331	early	51.8421	19	N
IFT140	0.0960418	late	65.3333	6	N
CNNM2	0.0964658	late	63.1538	13	N
GALNT2	0.0965387	early	52.5	14	N
NPAS3	0.096562	late	64.4286	7	N
PPP1R13L	0.0966025	early	48.6	5	N
FDXACB1	0.0966955	late	66.5	4	N
PEF1	0.0967353	early	46	3	N
KRTAP5-2	0.0967582	early	48.25	4	N
PROCR	0.0967582	early	48.25	4	N
AP3M1	0.0968137	late	62.3846	13	N
OR4A15	0.0969687	late	62.2353	17	N
ARL10	0.0970127	early	48.8333	6	N
MDH1	0.097072	early	47.5	4	N
PPME1	0.0972741	late	65.7143	7	N
KIFAP3	0.0973667	early	51.7	10	N
C14orf80	0.097461	late	69	3	N
CSF3R	0.0974864	early	48.2	10	N
KIAA1644	0.0976524	late	64.4444	9	N
AJAP1	0.0977843	early	45.6	5	N
TTK	0.0978881	early	51.5294	17	N
OSBP	0.0978969	early	51.5556	18	N
SLC38A10	0.0980249	late	60.8276	29	N
ANKRD33	0.0980467	late	63.8	10	N
WBP2	0.0980674	late	65.6	5	N
RALGAPB	0.0980822	early	53.4848	33	N
TRAF7	0.0981036	early	52.1176	17	N
FBXL8	0.0981241	early	45.4	5	N
DPPA4	0.0981467	early	49.6667	6	N
SLC2A7	0.0981821	late	64.2857	7	N
PRDM1	0.0982474	late	63.8	10	N
FRMD3	0.0982504	early	50.3333	6	N
CASKIN1	0.0982681	early	48.8333	12	N
IP6K3	0.098406	early	48.8333	6	N
YBX3	0.0984625	early	47.25	4	N
EDIL3	0.0984648	early	47.4	5	N
PLOD2	0.0984843	late	68.6667	3	N
TMPRSS5	0.0984964	early	52.4444	18	N
MAP3K19	0.0986137	late	65.6667	6	N
TP73	0.0986925	early	46	5	N
ATP6AP2	0.0987495	late	66.6	5	N
LYST	0.0989772	late	61.75	20	N
ABCC4	0.0990032	late	60.5484	31	N
GSK3A	0.0992872	early	50.5	8	N
DDX46	0.0993436	early	47.6667	6	N
PRR14	0.0994422	early	43.6667	3	N
CCNB2	0.0994841	early	48	7	N
HCN4	0.0995622	early	50.7692	13	N
TPM1	0.0995902	early	46.3333	3	N
RPL37	0.0997385	early	41.6667	3	N
ZNF398	0.0997818	early	50.6667	12	N
DHRS12	0.0998238	early	49.1429	7	N
DNAH11	0.100023	late	58.6497	177	N
TRANK1	0.100076	early	54.6705	88	N
LPA	0.100099	late	61.5238	21	N
TRPV3	0.100109	early	51.4	10	N
POU2AF1	0.10024	early	46.4	5	N
FKBP8	0.100311	early	48.4286	7	N
INO80E	0.100449	late	67.5	4	N
FLI1	0.100702	early	49.5714	7	N
HIP1R	0.10082	early	53.3333	24	N
SLC6A3	0.101133	late	62.1	10	N
NRG4	0.101226	late	67.25	4	N
SLC39A1	0.101241	late	64.5714	7	N
ZNF791	0.101283	early	49.4	5	N
ARPC5	0.101305	early	44.6667	3	N
AKAP13	0.101347	early	50.1667	6	N
NARFL	0.101347	late	66	6	N
FAM170A	0.101487	early	49.4286	7	N
SETD6	0.101615	early	51	12	N
SMC2	0.101806	early	50.5333	15	N
ADNP	0.101851	late	62.0385	26	N
SEMA4G	0.10232	late	60.2174	23	N
SYT11	0.102336	late	66.5	4	N
POGZ	0.102629	early	52.7895	19	N
ZC3H18	0.102746	early	53.8222	45	N
RSPH6A	0.102891	early	37	3	N
KRT76	0.102922	early	49	5	N
FGGY	0.102968	early	47.3333	3	N
ZNF202	0.103005	early	52.3125	16	N
NCAPH2	0.103035	early	52.9565	23	N
KLHL23	0.103059	late	66.5	4	N
GGT5	0.103196	early	47	3	N
MPZL1	0.103272	late	68.3333	3	N
ARHGEF39	0.103389	early	46.75	4	N
ZDHHC17	0.103399	early	52.1667	12	N
GATS	0.103455	late	68.75	4	N
AMER3	0.1036	late	61.2632	19	N
RNF43	0.103607	late	62.3333	9	N
TGFBRAP1	0.103618	early	52.6667	18	N
HARS	0.103783	early	52.4737	19	N
SYNE4	0.103807	early	46.6667	3	N
KCNH6	0.103852	early	44.5	4	N
VPS18	0.103881	early	52.96	25	N
GIT2	0.104044	late	63.4	10	N
NDUFA12	0.104118	early	46.75	4	N
HS2ST1	0.104204	late	63.4167	12	N
RPL18	0.104251	late	68	4	N
ZNF785	0.104251	early	41.25	4	N
FTO	0.104281	early	53.2143	14	N
DLK1	0.104344	early	47.3333	3	N
ANPEP	0.104404	late	60.6061	33	N
TNFRSF21	0.104421	late	70.6667	3	N
DENND1B	0.104522	early	47	5	N
VIPAS39	0.104574	early	46	3	N
ASCC3	0.104641	early	53.4667	30	N
FEN1	0.104729	late	67.6667	3	N
SEC23A	0.104731	late	61.4737	19	N
TNS1	0.104881	late	62.8571	7	N
FBN1	0.104897	late	60.5862	29	N
SIRPA	0.104902	late	65.1667	6	N
CPA2	0.104995	early	52.6429	14	N
BTC	0.105	late	66.2	5	N
AREL1	0.10505	early	53.2222	27	N
DSG1	0.105066	late	65.3333	6	N
MAP2K7	0.105083	late	64.2857	7	N
CCDC42B	0.105194	early	51.1333	15	N
KIAA0586	0.10542	early	48.4	5	N
LBR	0.105424	early	44.6667	3	N
DPY19L1	0.105489	late	64.8571	7	N
TERT	0.105606	early	52.5714	14	N
ST8SIA2	0.105655	late	66.75	4	N
SLC25A13	0.105693	late	62.5385	13	N
PPP1R16B	0.105723	early	49	4	N
BACH2	0.10578	early	52.1053	19	N
DRD4	0.105785	early	51.3333	15	N
EDEM1	0.105857	early	49	4	N
RNF222	0.105943	late	65.8333	6	N
ATP8B3	0.105993	early	49.5	10	N
EMC1	0.106059	late	61.1154	26	N
TSHZ3	0.10609	early	53.7027	37	N
HEYL	0.106194	early	50.1111	9	N
SNX19	0.106263	late	65.6	5	N
HDAC6	0.106375	late	61.5	12	N
GSTCD	0.106649	late	62.5833	12	N
CCDC121	0.106743	late	61.6316	19	N
GPHN	0.106926	late	62.9375	16	N
SPATS2	0.106938	early	50.3333	6	N
APOM	0.107112	early	48.6	5	N
PIP4K2B	0.107297	early	47.3333	3	N
TATDN1	0.107297	early	47.3333	3	N
LYRM9	0.107375	late	69.3333	3	N
C12orf29	0.107382	early	50.3333	6	N
LRBA	0.107404	late	59.8043	46	N
NFE2	0.107477	early	46.4	5	N
ETAA1	0.107483	late	66.75	4	N
KIAA0368	0.107491	late	60.8947	38	N
HSP90AB1	0.107515	early	50.5	8	N
COL11A1	0.107608	early	54.3889	36	N
UNC5CL	0.10769	late	68.6667	3	N
SCAMP4	0.107708	early	49.75	8	N
SLC27A4	0.107806	early	52.85	20	N
CYP27A1	0.107966	early	49.2	5	N
KRTAP10-1	0.10803	early	48.75	4	N
ANKS6	0.108053	late	64.2857	7	N
MNT	0.108098	late	66.5	4	N
IL31RA	0.108103	late	62.0667	15	N
LEPREL2	0.108297	late	60.7407	27	N
TMEM39B	0.108383	early	51	12	N
CD40LG	0.108456	late	66.2	5	N
ERCC6-PGBD3	0.108492	early	50.1818	11	N
RTN1	0.108719	late	68.3333	3	N
OPHN1	0.108878	late	70	3	N
TRIM9	0.108908	early	51.2727	11	N
MDN1	0.108995	late	60.3556	45	N
XPO4	0.109166	early	52.5789	19	N
EVPLL	0.109179	late	63.0833	12	N
ANLN	0.109195	early	46.6	5	N
PLCL1	0.109195	early	48.6	5	N
EPSTI1	0.109343	late	66	6	N
SLC22A7	0.109366	early	50.3636	11	N
PAG1	0.10941	early	51.125	8	N
OR6C68	0.109751	late	67	4	N
ZNF296	0.109867	early	50.4545	11	N
GNA15	0.109883	late	62.3125	16	N
LHX8	0.10989	late	66.25	4	N
NMNAT2	0.1099	late	63.125	8	N
DIP2C	0.109959	early	53.4	30	N
RASSF9	0.110028	early	47.25	4	N
C21orf2	0.110124	late	65.8	5	N
RBCK1	0.110124	late	63.5556	9	N
BRI3BP	0.110135	late	65.1667	6	N
GPNMB	0.110167	late	66.25	4	N
SNAP25	0.110236	early	47	3	N
SDHB	0.110316	late	69.6667	3	N
ZC3H15	0.110317	early	51.7333	15	N
SUPT4H1	0.110373	late	66	5	N
TSPAN33	0.110373	late	67.6	5	N
MYL6B	0.110446	late	68	4	N
FECH	0.110455	late	64.4286	7	N
SHPK	0.110477	early	47.3333	3	N
WWP2	0.110601	late	62.3846	13	N
SLC15A4	0.110761	late	65	6	N
2018-09-02	0.110799	early	43.3333	3	N
BEST3	0.110932	early	46	6	N
CCDC171	0.111027	early	54.6596	47	N
AKR1A1	0.111074	early	46	4	N
OXCT1	0.11116	early	49.8333	6	N
PRKAA2	0.111228	early	53	12	N
UBA3	0.111231	early	50.375	8	N
FAM69A	0.111373	late	66.2	5	N
NUDT3	0.111435	early	48.6	5	N
SLC25A10	0.111637	early	51.6364	11	N
TJP1	0.111649	early	53.8	45	N
SNAPC4	0.111655	early	50.9333	15	N
MYL10	0.111663	early	50.6667	9	N
2018-03-01	0.11179	early	48.2	10	N
TAF15	0.111812	early	48.6	5	N
ZNF519	0.111884	early	49.2857	7	N
IPPK	0.112038	late	64.6667	9	N
PP2D1	0.112038	late	64	9	N
PPM1M	0.112038	late	64	9	N
SLC9C1	0.112092	early	52.7857	14	N
CHDC2	0.112104	late	63.4545	11	N
DNAJC15	0.112316	late	66.2	5	N
CLCA2	0.112343	late	62.4444	18	N
ERI3	0.112583	late	67.3333	3	N
ACSS1	0.11264	early	53.1818	22	N
KIF19	0.112684	late	64.7143	7	N
NCKIPSD	0.112828	early	45.6667	3	N
FSD1L	0.113026	late	65	8	N
C10orf2	0.113117	early	45.75	4	N
IFRD1	0.113177	late	64	8	N
IGFN1	0.113205	early	54.837	92	N
POLR1A	0.11326	early	52.875	16	N
MFAP5	0.113319	early	46	3	N
EFCAB4A	0.113408	early	50.1111	9	N
ROBO3	0.113408	early	50.1667	6	N
MAGI3	0.113672	early	52.4	10	N
SRR	0.113977	early	44.3333	3	N
STK31	0.114004	early	53.037	27	N
CCR1	0.114032	early	50.3636	11	N
LMBRD1	0.11406	early	46.6667	3	N
RHBDF1	0.114132	early	51.5833	12	N
USP11	0.114137	late	63.7143	7	N
SCYL1	0.114175	late	61.7895	19	N
EPHA10	0.114296	early	52.5333	15	N
MAGEC3	0.11433	late	61.5882	17	N
FCRL4	0.114864	early	49.6	5	N
TPTE2	0.114887	early	45.6667	3	N
STAMBP	0.11495	late	62.7143	7	N
CDCA3	0.114983	early	51.4545	11	N
TGFB1	0.115104	early	52.2857	14	N
SERTAD2	0.115252	late	64.125	8	N
SOS2	0.115262	early	43.5	4	N
CALU	0.115331	early	49.5714	7	N
CARF	0.115406	early	47.75	4	N
HPS4	0.115468	early	48	3	N
MAF	0.115478	early	48.5	4	N
BAZ1A	0.115518	early	52.1176	17	N
SLC45A4	0.115541	early	52.7667	30	N
SCN10A	0.115563	early	52.0526	19	N
KIAA1683	0.115572	early	48.8	5	N
NSUN6	0.115766	late	66.6	5	N
ARHGAP30	0.115809	late	65.1667	6	N
CACNG3	0.115868	late	65.3333	6	N
NFU1	0.115969	early	46.3333	3	N
BMP1	0.115995	early	51.8947	19	N
ZNF433	0.116174	early	50.8	10	N
MOSPD1	0.116219	late	67	5	N
LAIR2	0.116425	early	49.7143	7	N
GTPBP10	0.116519	late	65.3333	6	N
ATF2	0.116589	late	66.2857	7	N
ENDOG	0.116638	early	48	6	N
RASSF6	0.116639	late	67.6667	3	N
ERN2	0.116653	early	51.5	14	N
CHAT	0.116715	early	53.2353	17	N
GCKR	0.116928	early	45.25	4	N
SON	0.116958	early	54.2203	59	N
KIAA0753	0.116994	early	49.8333	6	N
LHX4	0.117195	late	65.8	5	N
TREM2	0.117292	late	66	4	N
KCNE2	0.117416	early	47.8571	7	N
HIST1H2AC	0.117438	early	49	4	N
RPE65	0.117708	late	62.6429	14	N
KIAA0825	0.117734	late	67.6667	3	N
VASH1	0.117832	early	50.8182	11	N
NRBP1	0.117877	early	48	4	N
SPSB1	0.117951	early	49	4	N
DTHD1	0.117965	early	54.3333	33	N
KIAA1586	0.118112	early	48.6	5	N
OFD1	0.11814	late	62.3571	14	N
ASB8	0.118157	early	48	3	N
PDCD1	0.118157	early	45	3	N
ZBTB40	0.118256	early	52.3125	16	N
TMPRSS9	0.118494	late	62.5714	14	N
LRMP	0.118533	late	63.4	10	N
FCN1	0.118573	late	65.2	5	N
ARFRP1	0.11867	late	65.5	6	N
PLSCR4	0.11876	early	48.25	4	N
SUDS3	0.11886	early	50.7143	7	N
TVP23C	0.118907	late	67	4	N
PLEKHF1	0.118919	late	63.1111	9	N
ADAM30	0.118934	early	51.8462	13	N
GPR116	0.119031	late	59.9024	41	N
GADD45A	0.119425	late	66	4	N
DCAF6	0.119571	early	51.8235	17	N
RPL21	0.119605	early	48	3	N
PRR12	0.119728	early	53.72	25	N
SLC25A3	0.119868	early	49.7143	7	N
CECR6	0.11987	late	66	4	N
ARHGAP21	0.11991	early	52	8	N
PPP6R2	0.12004	early	52.875	24	N
SLC28A2	0.120061	early	50.3333	6	N
TOX2	0.12012	late	68	3	N
MCM6	0.120478	early	52.8571	14	N
PCDHA7	0.120503	late	63.7778	9	N
ZNF552	0.12055	early	42.6667	3	N
DOCK10	0.120557	late	61.6	20	N
NFE2L3	0.120752	late	63.3333	9	N
AKAP10	0.120834	early	51.8	10	N
KRTAP25-1	0.120838	early	49.25	4	N
FMO3	0.121067	early	46.3333	3	N
FAM173B	0.121097	late	65.3333	6	N
EVI5L	0.121124	late	64.25	8	N
CACNA1F	0.121194	early	53.6	25	N
ACRV1	0.121231	late	65.4	5	N
ZNF816	0.121389	early	50.625	8	N
ADRBK1	0.121392	late	64	7	N
BEND7	0.121413	early	47.6667	3	N
CATSPER2	0.121437	late	66.5	4	N
STXBP2	0.121449	early	50.7143	7	N
ARHGAP39	0.121472	early	52.7143	21	N
PDXK	0.121495	late	63.75	8	N
CCDC101	0.121499	late	64.8	5	N
CCDC41	0.121569	late	61.75	16	N
FMR1	0.121648	late	64.6667	6	N
TMEM8A	0.12176	early	43.6667	3	N
COL28A1	0.121771	early	47.6667	6	N
SGSM2	0.121867	early	50.2727	11	N
CLEC5A	0.121974	early	49.5	10	N
SUMO1	0.122039	late	67	4	N
LRRD1	0.122042	late	61.7647	17	N
CACFD1	0.122054	late	63.5556	9	N
SLC1A6	0.12214	early	49.3333	6	N
SPAG9	0.122188	late	61.7083	24	N
CENPV	0.122189	early	47.75	4	N
GTF2B	0.122334	early	51.5385	13	N
BTBD17	0.122509	early	50.4	5	N
ZNF117	0.122567	early	48.25	4	N
GTF2F1	0.122571	late	66.8333	6	N
BIRC3	0.122708	early	50.5556	9	N
RTN4RL2	0.122718	early	43.3333	3	N
EPB41	0.122718	early	49.25	4	N
RNF26	0.122725	early	52.0952	21	N
EVI5	0.122757	early	49.3333	6	N
GLTSCR1L	0.122759	late	63.6667	9	N
EHBP1	0.122915	late	62.2727	11	N
SIK2	0.123095	late	62.8571	14	N
THAP7	0.123255	early	47.6	5	N
ANKRD50	0.123386	early	52.4444	18	N
COLEC12	0.123505	early	52.9565	23	N
TRIM21	0.123652	late	61.75	16	N
PLBD2	0.123664	late	62.2857	14	N
HSD3B2	0.123724	early	51.0769	13	N
ZNF532	0.123833	late	60	25	N
STRAP	0.123857	late	66.25	4	N
GLRA3	0.123863	early	51.4167	12	N
PRKCZ	0.12419	early	50.9231	13	N
BCAT2	0.12423	early	51.1111	9	N
CDCA8	0.12423	late	65	9	N
USP44	0.124298	late	69.6667	3	N
CPB1	0.124345	early	49.6	5	N
BBX	0.124474	late	67	3	N
MIB1	0.124476	late	61.6364	22	N
RNF165	0.124552	late	63.375	8	N
ITGB1	0.124622	late	65	6	N
SEMA3E	0.124666	early	50.3	10	N
DNM3	0.124775	early	53.0588	17	N
FTSJ1	0.124916	late	67	3	N
ALYREF	0.125081	late	66.5	4	N
DDX43	0.125157	late	66	4	N
ABCA13	0.125201	early	54.1667	36	N
CPVL	0.125223	early	51.7647	17	N
NAA40	0.125367	late	63.75	8	N
FAAH	0.125385	early	52.4286	14	N
ORC6	0.125751	late	64.3333	6	N
TMEM208	0.126005	early	49.25	4	N
DAW1	0.126072	early	45.6667	3	N
KCNF1	0.126132	late	66	5	N
MYO18A	0.126247	late	61.5	20	N
RCBTB1	0.126289	early	50.7143	7	N
SESTD1	0.126319	early	48.1667	6	N
TBCK	0.126501	late	62.4286	14	N
OXR1	0.126513	late	62	15	N
PRKACB	0.126779	early	49.25	4	N
LAMA2	0.12679	late	59.4082	49	N
DHH	0.126856	early	49	4	N
C19orf44	0.126889	early	50.6667	6	N
NTM	0.126895	late	66.2	5	N
GPRC5A	0.127146	early	48	3	N
SLC43A1	0.127213	early	50.8889	9	N
ACAP2	0.127245	late	67	4	N
ITGA1	0.127292	late	62.6667	12	N
SV2B	0.127717	late	60.6111	18	N
HK2	0.127746	early	53.75	20	N
ARSG	0.127793	late	61.7692	13	N
BIN1	0.1278	early	50.7	10	N
GRID1	0.127911	late	60.2759	29	N
FRG1	0.127936	early	51.1429	7	N
GTPBP3	0.127948	early	49.7	10	N
PAFAH1B2	0.128025	early	49.25	4	N
PRDM8	0.128098	late	64.8333	6	N
PDE4B	0.128103	late	66	4	N
SELV	0.128162	late	65	6	N
CCBL2	0.128226	early	40.6667	3	N
ZNF585A	0.12829	early	50.8333	6	N
NOTCH4	0.128331	late	60.68	25	N
GOLGA5	0.128405	late	63.2727	11	N
TMEM19	0.128418	late	64.8333	6	N
WFDC10A	0.128647	late	64.8571	7	N
DLK2	0.128679	late	67.3333	3	N
N4BP1	0.12877	early	44.6667	3	N
HP	0.129042	late	67.6667	3	N
PSMD1	0.129143	early	50.6923	13	N
GIMAP8	0.129161	early	51.6667	18	N
CNGA4	0.129592	late	63.0909	11	N
ATAD2B	0.129663	late	60.9545	22	N
RAPSN	0.129719	late	64.7143	7	N
OR5K1	0.12977	late	67.6667	3	N
GLYATL1	0.129926	early	52.8182	11	N
GNAI2	0.129981	early	52	14	N
RNF40	0.13	late	61.6471	17	N
IGSF9	0.130152	late	62.75	12	N
ZNF77	0.130192	early	49.6	5	N
AUNIP	0.130197	late	65.7143	7	N
ZIC3	0.130466	late	66.5	4	N
BTBD6	0.130516	late	61.6667	9	N
CYP3A43	0.130593	late	68	3	N
THAP11	0.130634	early	53.4615	26	N
MCU	0.13076	late	65	5	N
HIPK4	0.130794	late	63.25	12	N
AOC3	0.130818	late	62	15	N
PDZD7	0.130931	late	63.7273	11	N
HCN1	0.130943	late	65.75	4	N
SALL3	0.131065	late	62	15	N
EGFR	0.131107	early	53.1111	18	N
PVRL1	0.131339	early	50.1429	7	N
TMEM62	0.131604	late	68	3	N
NYNRIN	0.131808	early	53.7857	28	N
MUC6	0.131818	early	54.2963	54	N
C6orf89	0.131823	late	63.8571	7	N
RNF17	0.131864	early	52.625	16	N
NOP56	0.131976	late	64.3333	6	N
ETS1	0.132327	early	51.1111	9	N
UTP14C	0.132529	early	47.3333	3	N
ADCK1	0.132542	early	47	4	N
LRCH1	0.132542	early	51.25	8	N
RNFT2	0.132634	early	52.6923	13	N
KIF23	0.13297	early	52	9	N
DDX1	0.133026	late	64.5	6	N
DOLPP1	0.133026	early	48.8333	6	N
COL27A1	0.133246	early	51.96	25	N
LIN7C	0.133266	late	66.5	4	N
GJC3	0.133487	early	49.6667	6	N
MAP1LC3A	0.133552	late	67.3333	3	N
AHCTF1	0.133624	early	52.2	20	N
PELI2	0.133664	late	62.5385	13	N
UGT2B15	0.133686	early	51.6	10	N
STON1	0.133817	early	49.1667	6	N
CNGA1	0.133832	late	68.3333	3	N
DYNLRB1	0.134112	early	46	3	N
AQP1	0.134148	early	46.1667	6	N
MRPL52	0.13428	late	65.4	5	N
RBM38	0.134319	late	64.2222	9	N
EXT2	0.134327	late	62.9091	11	N
ACOT4	0.134393	late	67.6667	3	N
NLRP1	0.134529	late	60.2727	22	N
NUDT1	0.134581	late	68	3	N
GNAZ	0.134589	early	50.2222	9	N
STK24	0.135024	early	51.8889	9	N
FGF12	0.135211	early	49.5	6	N
MKL1	0.135306	early	53.0625	16	N
GRAMD1C	0.135411	late	64.8333	6	N
F13B	0.135458	late	67	4	N
NDUFA6	0.135557	early	51.7273	11	N
TRNT1	0.135591	early	48.8	5	N
KCNA4	0.135621	late	66	4	N
STK17A	0.135678	early	50	6	N
FBN2	0.135678	early	54.5769	52	N
HIRA	0.135784	early	51.4167	12	N
HAAO	0.135787	late	63.5556	9	N
GORAB	0.135853	early	51.6364	11	N
BTN2A1	0.136166	late	61.8667	15	N
HOOK3	0.136213	late	63	10	N
VAV1	0.136244	early	52.8462	13	N
HACE1	0.136269	early	52.2353	17	N
PSMC4	0.136373	early	46.6667	3	N
PTGS2	0.13638	early	51.8462	13	N
TMEM66	0.136468	late	67.3333	3	N
DCUN1D4	0.136481	early	47.5	6	N
IL11	0.136482	late	63.8571	7	N
RBMS1	0.136548	early	50.6667	6	N
ABCB4	0.136608	early	51.7778	9	N
SIAE	0.136847	late	67.3333	3	N
PAICS	0.136918	late	63.7143	7	N
MSN	0.137038	early	47.6667	3	N
XRRA1	0.137045	early	50.1	10	N
TCF7	0.13715	late	65.375	8	N
HLA-DMA	0.137181	late	66	4	N
RETSAT	0.137221	late	64.1667	6	N
SPATA5	0.137307	late	63	10	N
CDH23	0.137375	early	53.56	25	N
PRSS36	0.137429	early	47.75	4	N
CCDC159	0.1375	late	64	8	N
FLYWCH2	0.137514	early	46.3333	3	N
PGD	0.13755	early	53.1111	18	N
APBA3	0.137559	early	50.875	8	N
MACROD2	0.137598	early	49.2222	9	N
ANKRD35	0.137625	late	64.8333	6	N
TGM7	0.1378	early	48	3	N
ADH7	0.137992	late	67.3333	3	N
PAAF1	0.138021	early	49	5	N
PPP1CC	0.138318	late	65.4	5	N
ADD3	0.138372	late	64	9	N
PRDM12	0.138471	early	46.3333	3	N
TESK1	0.138471	late	70.3333	3	N
BRDT	0.138618	early	52.8	10	N
FASTKD3	0.138676	late	62.1538	13	N
SLC6A8	0.13876	late	64.2222	9	N
UNC13C	0.1388	early	52.9615	26	N
FADS3	0.138839	early	48.4	5	N
TFRC	0.138913	late	65.4	5	N
NUDT16	0.138922	late	65.75	4	N
CENPE	0.13897	early	54.9667	60	N
FLNA	0.138998	late	61.2857	28	N
SMIM13	0.139047	early	48	3	N
CDK5	0.139089	early	48.5	4	N
EXOC6B	0.13939	early	50.5	6	N
CLCA4	0.139499	early	49.25	8	N
RFXAP	0.139529	early	44	3	N
ACOT12	0.139585	early	49	5	N
TECTA	0.139672	early	52.25	20	N
IQGAP1	0.13977	early	53.2414	29	N
CHST2	0.1398	early	46	6	N
DNMBP	0.139815	late	62.5294	17	N
ISL1	0.139852	late	59.6667	12	N
CREBZF	0.139886	late	62.4	10	N
EPB41L1	0.139904	late	61.4375	16	N
PTER	0.139915	late	68.6667	3	N
PEX1	0.139992	late	62.9	10	N
CCDC51	0.140012	early	48	3	N
ABHD16A	0.140016	early	52.9565	23	N
SLC24A5	0.140176	early	45.5	4	N
LYZL4	0.14025	early	51.5714	7	N
MSMO1	0.140266	early	52.1111	9	N
RAPGEFL1	0.140417	late	62.2	10	N
MUC20	0.140485	early	50	6	N
GRK7	0.140511	early	48.25	4	N
RPGRIP1	0.140531	late	62.0833	12	N
ITFG1	0.140579	late	63.3333	12	N
MPDU1	0.140622	early	47.1667	6	N
CLVS1	0.14069	late	67.3333	3	N
ESYT1	0.140695	early	49.5714	7	N
SLC25A25	0.140745	late	61.875	16	N
FETUB	0.140842	late	62.8	10	N
APOBEC3F	0.140884	late	67.6667	3	N
STX11	0.141274	late	68.3333	3	N
WDR76	0.141464	late	65	5	N
IFI35	0.141566	late	66.6667	3	N
FAM64A	0.141727	early	49.8889	9	N
SLC13A2	0.141975	early	52.8	25	N
TMEM132B	0.142127	late	59.7188	32	N
BRSK2	0.14215	early	51.8824	17	N
MKNK2	0.142243	early	51.0909	11	N
HMOX2	0.14225	late	68	3	N
CWF19L2	0.142288	early	50.5	12	N
DLL4	0.142499	early	52.1818	11	N
SEPHS1	0.142544	early	48	3	N
PPP2R2C	0.142624	late	66.5	4	N
OLFM2	0.142647	early	52.6154	13	N
SIGLEC11	0.142677	early	50.8	5	N
FEZF2	0.14274	late	67	3	N
FLVCR1	0.142933	early	52.1	10	N
DHX34	0.142941	late	59.9444	18	N
HLA-DPA1	0.142964	early	49.25	4	N
ZNF609	0.14307	early	53.5	30	N
KIF1B	0.143121	early	54.8372	43	N
MXRA7	0.143143	early	52.3333	9	N
SNAP91	0.143163	late	60.1875	16	N
PPAN	0.14333	late	67.6667	3	N
BAAT	0.143451	early	44.1429	7	N
TRIM2	0.143504	late	63.5	8	N
TMEM201	0.143542	early	50.5556	9	N
DPYSL4	0.143579	early	51.8182	11	N
NGLY1	0.143681	early	53.6429	14	N
DMBT1	0.143731	early	53.9688	32	N
MLLT6	0.143797	early	51.4	10	N
WNT8A	0.143878	early	49.1667	6	N
CCDC63	0.143974	late	65	5	N
USP37	0.144219	early	45	3	N
NRG2	0.144399	early	52.3333	9	N
FBL	0.144406	early	52.4545	11	N
KLB	0.144609	late	60.9474	19	N
DEPDC7	0.144718	early	51.6667	6	N
KNOP1	0.144814	early	46.6667	3	N
BMPR1A	0.144838	early	49.875	8	N
GXYLT1	0.144913	late	69	3	N
NFIC	0.145009	early	50.6875	16	N
DCAF15	0.145105	late	62.2143	14	N
ATF7IP	0.145334	early	54.2333	30	N
CCDC68	0.14541	late	67	3	N
GRM3	0.145445	early	52.3636	11	N
TTC38	0.145504	late	62.1667	12	N
VIL1	0.145527	late	62.1333	15	N
MPHOSPH9	0.145882	early	47.25	4	N
C4orf21	0.145915	early	49.3333	6	N
RBM39	0.146009	early	47	3	N
IFT88	0.146131	late	66	5	N
OVOL2	0.146198	early	51.8333	6	N
CRB2	0.146575	early	51.2857	7	N
GAL3ST2	0.146641	late	64.2857	7	N
NSUN5	0.14681	early	49	3	N
ONECUT2	0.146835	late	66	4	N
CLEC1A	0.146922	late	68.5	4	N
TMEM106C	0.14698	late	63.5	8	N
NANOS3	0.146992	early	51.5556	9	N
TNFSF18	0.147096	early	49.5	4	N
CDR1	0.147365	late	64.5714	7	N
TRIOBP	0.147441	early	54.7	40	N
PIGK	0.147513	late	66.6667	3	N
TUB	0.147534	early	51.125	8	N
AZI1	0.147614	early	48	3	N
CHST14	0.147761	late	64.6667	6	N
MRGPRX1	0.147781	early	51.375	8	N
LSG1	0.147815	late	66.3333	3	N
FCAMR	0.147915	late	61.8889	18	N
FAM216A	0.148077	late	65.8	5	N
SIAH2	0.148118	early	48.3333	3	N
TRMT6	0.148153	late	63.625	8	N
SEC63	0.148261	late	64.5	6	N
ATP2B2	0.148266	late	62.1765	17	N
SUPT20H	0.148316	early	50.2667	15	N
PLXNB1	0.148349	late	61.55	20	N
ABCB8	0.148421	late	68	3	N
ARID2	0.148481	early	52.9565	23	N
FAM32A	0.148522	late	67	3	N
MCTP1	0.148624	late	63.2222	9	N
SLC11A2	0.148649	late	63.75	8	N
HMGCR	0.148901	late	62.2	10	N
SLC22A14	0.148927	late	62.6667	12	N
DGKA	0.148932	late	66.25	4	N
LRRN2	0.149018	early	49.4	5	N
DCSTAMP	0.14902	early	50.5714	7	N
QRSL1	0.149063	late	61.375	16	N
SMYD3	0.149146	late	63.375	8	N
PIKFYVE	0.14916	early	54.6944	36	N
PARL	0.149196	late	65.25	4	N
TFR2	0.149265	early	48.6667	6	N
CPNE5	0.149283	late	62.3333	18	N
PHLDB2	0.149328	late	61.9231	13	N
CCL27	0.149639	late	66.6667	3	N
TRIM5	0.149639	late	66.6667	3	N
GPR183	0.149725	late	67.75	4	N
DMRTB1	0.149843	late	69.3333	3	N
PCDHGA6	0.149843	early	48.6667	3	N
SLC13A3	0.150072	late	62.6	10	N
RAET1L	0.150149	early	47.6667	3	N
DUSP22	0.150166	early	49.5	4	N
CRYBA1	0.150251	late	67.6667	3	N
WBP2NL	0.150352	early	52.6364	11	N
MAGED2	0.150431	late	65.5	4	N
UQCRH	0.150455	early	43	3	N
SLC4A3	0.150522	early	53.5	16	N
EFCC1	0.150595	early	53.3333	15	N
TMEM39A	0.150619	early	50.6364	11	N
KLHL32	0.150621	early	50.5714	7	N
ZNF480	0.150645	early	52.25	8	N
TOR1B	0.150823	early	50	7	N
CAMK1D	0.151024	late	62.8571	7	N
ADARB2	0.151081	early	53.8333	30	N
LRRTM4	0.151153	early	49.2	5	N
DPM2	0.151312	early	49.8	5	N
MORC1	0.151412	late	62.5625	16	N
TBC1D4	0.151484	late	63	12	N
TMEM56	0.151497	early	49.75	4	N
SLC52A2	0.151505	late	64.5	6	N
MLLT3	0.151514	late	62.2	15	N
TMEM194B	0.151714	early	52	8	N
FAM83F	0.151724	early	50.8333	6	N
MGAT4A	0.151764	late	67.75	4	N
DICER1	0.151792	early	53.8966	29	N
OS9	0.151891	early	42.6667	3	N
MMP27	0.15193	early	51.1111	9	N
NYAP2	0.151966	late	63.375	8	N
CNOT6L	0.152101	late	63.7143	7	N
COG6	0.152121	early	49.25	4	N
TMEM220	0.152303	late	66.6667	3	N
C22orf15	0.152407	late	67.6667	3	N
CHD3	0.152541	early	53.9048	21	N
ERBB2	0.152592	late	59.931	29	N
RPS3	0.152717	early	43	3	N
RAB28	0.152719	late	62.1	10	N
TRIM25	0.152778	late	63.8571	7	N
PKD2L1	0.153123	late	62.3333	9	N
CCDC144A	0.153331	early	51.6667	6	N
PAX4	0.153391	late	64.6	5	N
TCP11L2	0.153471	early	51.2	5	N
FRMD6	0.153614	late	63.125	8	N
CCL2	0.153644	early	49	4	N
PGM3	0.15366	late	64	7	N
TRPM3	0.15371	early	54.1515	33	N
RSPO3	0.153734	late	65.25	4	N
ARNT	0.153743	late	60.5625	16	N
TENM4	0.153761	late	59.1477	88	N
NBR1	0.153796	late	64.8571	7	N
IL18BP	0.153843	late	63.5556	9	N
UBASH3A	0.153856	early	52.1	10	N
OCSTAMP	0.153879	early	52.1765	17	N
NUP50	0.153903	early	53	9	N
PRC1	0.153961	late	69	3	N
CAPN14	0.154015	early	53.8148	27	N
C1GALT1C1	0.154035	late	64.6	5	N
ETFA	0.154084	early	51.7778	9	N
TNFAIP1	0.154169	late	66.3333	3	N
SLC24A4	0.15421	late	61.5	20	N
M1AP	0.154251	late	61.7	20	N
PIK3R3	0.154273	late	68.6667	3	N
WDR20	0.154282	early	51.1667	12	N
CXADR	0.154546	early	48.5	4	N
TK2	0.154681	early	47.6	5	N
GSTO2	0.15469	early	46	3	N
MRPL37	0.15469	early	49	3	N
USP47	0.154703	late	60.5217	23	N
KIAA1715	0.154747	late	63.1111	9	N
TAF1A	0.154762	early	47	5	N
DPP10	0.155062	early	53.65	20	N
CPXCR1	0.155108	late	68.3333	3	N
ZNF652	0.155174	late	65.6667	6	N
OR52E6	0.155329	late	65	5	N
TM2D2	0.155572	late	68.6	5	N
EIF4A1	0.15599	early	50.1667	6	N
KIF2C	0.156012	late	63.1429	14	N
NAALADL1	0.156052	late	67.6667	3	N
PSMB2	0.156368	early	48.6667	3	N
VIPR2	0.156452	late	65.5	4	N
MSL3	0.156564	early	50	8	N
LRR1	0.156612	late	62.3	10	N
ADAP1	0.15666	early	45.8333	6	N
PCSK1	0.156795	early	48.8	5	N
ZFYVE27	0.156855	early	54.1905	21	N
FAM71C	0.156876	late	65.2	5	N
TMEM88	0.156884	late	62.8333	6	N
SLC25A6	0.157053	late	62.3333	9	N
CIDEC	0.157368	early	49.8	5	N
NPL	0.157368	early	50.1429	7	N
CPOX	0.157423	late	68	3	N
DHRS3	0.157507	early	49.7143	7	N
FAM101A	0.157529	late	66.3333	3	N
ZNF772	0.157529	early	45.6667	3	N
ZNF491	0.157733	late	67.25	4	N
ARL4A	0.157846	late	66.3333	3	N
TYK2	0.15793	early	52.2083	24	N
PLA2G4E	0.158211	early	54.1379	29	N
SLCO1B3	0.158284	early	48.5	4	N
HOXC6	0.158353	early	51.2	5	N
EMILIN2	0.158561	late	66.5	4	N
SIM1	0.158575	early	52.375	8	N
GDF6	0.158608	early	50.3333	6	N
LETMD1	0.158683	late	64.1667	6	N
KIAA0907	0.158696	early	47	3	N
RNF31	0.158744	early	52.0952	21	N
TMEM252	0.158745	late	65.5	4	N
CIR1	0.158929	early	46.75	4	N
MST1R	0.159023	late	60.8333	30	N
HDAC5	0.159027	late	60.0357	28	N
CRLF3	0.159032	late	62.75	8	N
PALM3	0.159139	late	63.8889	9	N
FKBP2	0.159229	early	47	3	N
SARS	0.159261	early	47	5	N
KCTD15	0.159299	late	65.75	4	N
RRBP1	0.159552	early	54.3947	38	N
TOPBP1	0.159553	late	60.9524	21	N
ZDHHC1	0.159738	early	52.0625	16	N
SAG	0.15974	late	63.1667	6	N
SCD5	0.159835	early	52.6667	12	N
UGT2B11	0.159841	early	49	5	N
MPZL3	0.15987	late	68	3	N
IL17RE	0.16009	early	51	5	N
TSTA3	0.160103	early	52.6667	12	N
TADA2A	0.160211	late	63.125	8	N
C21orf59	0.160229	late	64.1429	7	N
PWWP2A	0.160251	late	62.7778	9	N
WDR3	0.160251	early	52	9	N
ZSWIM2	0.160264	late	62.4167	12	N
MNDA	0.160299	early	47.6667	3	N
ZNF720	0.160299	early	45.3333	3	N
SLC38A4	0.160422	late	64.6	5	N
EDN3	0.16054	early	50.625	8	N
NCKAP5	0.160621	early	46.6667	3	N
POMGNT1	0.160651	late	61.9333	15	N
POLH	0.160791	early	50	7	N
ITPR2	0.160923	early	54.9167	48	N
ZNF641	0.160932	early	51.7143	7	N
PPRC1	0.160943	late	67.6667	3	N
NEK11	0.16097	early	50.25	4	N
CFHR4	0.161005	late	64.8	5	N
MYOF	0.161063	late	59.9688	32	N
SMARCA4	0.161133	late	63.875	8	N
NUDC	0.161172	late	65.6	5	N
GIF	0.161343	late	65.25	4	N
RNASEH1	0.16137	late	63.3333	9	N
KIF20A	0.161443	early	53.6429	14	N
TPCN1	0.161474	early	51	13	N
WDR25	0.161557	early	52	9	N
FSIP1	0.161589	early	50.6	5	N
AGGF1	0.16181	late	65.5	4	N
SLC5A3	0.161819	late	62.7	10	N
GPR133	0.161921	early	49.2857	7	N
HS6ST1	0.161931	early	51.1111	9	N
GBP6	0.161997	early	50.25	4	N
PHF19	0.162052	late	61.6667	15	N
SLC16A9	0.162063	late	64.7143	7	N
GPR75	0.162077	late	61.6316	19	N
ZNF468	0.162258	early	51.125	8	N
FAM184B	0.162476	late	59.3611	36	N
GAK	0.162697	early	54.1429	14	N
ANGPTL7	0.162748	late	65.25	4	N
REL	0.162748	early	49.5	4	N
TMEM53	0.162856	early	50	8	N
GPR45	0.162866	late	64	6	N
HIST1H1T	0.163311	late	60.1923	26	N
STRBP	0.163312	early	50	4	N
VRTN	0.163348	early	53.5	26	N
DGAT1	0.163407	late	65.75	4	N
NXPE3	0.163498	late	61.2222	9	N
SIK3	0.163528	early	54.8276	29	N
KCNQ5	0.16362	late	62.3333	12	N
NF1	0.163681	late	60.3333	30	N
C3orf58	0.163759	late	66.3333	3	N
ZNF512B	0.163808	early	54.2	35	N
KCNMA1	0.163903	late	62.6	10	N
CRMP1	0.16391	late	61.375	16	N
TFDP2	0.163973	late	65	4	N
TMEM38B	0.163973	early	48.75	4	N
MAST2	0.16399	early	55.1912	68	N
SNAPC3	0.164124	early	49.5	8	N
L3MBTL2	0.164165	early	52.8333	18	N
PRPF18	0.164175	early	50.6667	6	N
SPRY4	0.16433	late	61.5789	19	N
ZNF354C	0.164413	late	64.4286	7	N
RBM45	0.164484	early	51.1667	6	N
ATP2C1	0.164526	late	63.75	8	N
LACE1	0.164635	early	48.5	4	N
ARHGAP6	0.164742	early	48.6667	3	N
CRYBB2	0.16496	early	49.8	5	N
UGGT1	0.164982	early	51.4	10	N
ADAM29	0.164987	early	48.8571	7	N
CX3CL1	0.165002	late	61.5625	16	N
NUPR1L	0.165104	early	51.1667	6	N
GALNT1	0.165127	late	62.2	15	N
FAM151A	0.16518	late	68	3	N
GPR137C	0.165203	early	52	7	N
[truncated: 14,218 more rows]
