# Supplementary material for: A new approach for rare variation collapsing on functional protein domains implicates specific genic regions in ALS
Source: HighWire-hosted journal article supplement (doi:10.1101/gr.243592.118), 2019-04-02
Supplement: Supplemental_Table_S9.xlsx [file Supplemental_Table_S9.xlsx]

## Sheet: SupplementaryTableS8_ultraRareM
Supplementary Table S9. Genes summary Ultra-Rare Model (0% ExAC MAF)
Rank	Gene Name	Qualified Case	Unqualified Case	Qualified Case Freq	Qualified Ctrl	Unqualified Ctrl	Qualified Ctrl Freq	Enriched Direction	Fet P
1	SOD1	41	3052	0.0133	4	8182	0.0004886	case	3.286e-19
2	ETV4	20	3073	0.0065	12	8174	0.0015	case	3.433e-05
3	SPRY4	12	3081	0.0039	5	8181	0.0006108	case	0.000259
4	TARDBP	14	3079	0.0045	8	8178	0.0009773	case	0.0004096
5	USP40	32	3061	0.0103	35	8151	0.0043	case	0.0004698
6	SERPING1	10	3083	0.0032	4	8182	0.0004886	case	0.000763
7	C2orf44	8	3085	0.0026	2	8184	0.0002443	case	0.0008197
8	LMTK3	2	3091	0.0006466	36	8150	0.0044	ctrl	0.0008516
9	RGL3	19	3074	0.0061	16	8170	0.002	case	0.0008893
10	DNTT	1	3092	0.0003233	30	8156	0.0037	ctrl	0.0009289
11	GDAP1	13	3080	0.0042	8	8178	0.0009773	case	0.0009683
12	ZNF25	16	3077	0.0052	12	8174	0.0015	case	0.001
13	PACS2	21	3072	0.0068	19	8167	0.0023	case	0.001
14	DNAH2	80	3013	0.0259	133	8053	0.0162	case	0.0011
15	F8	10	3083	0.0032	73	8113	0.0089	ctrl	0.0012
16	DARS2	19	3074	0.0061	17	8169	0.0021	case	0.0012
17	EWSR1	1	3092	0.0003233	29	8157	0.0035	ctrl	0.0015
18	S100A11	5	3088	0.0016	0	8186	0	case	0.0015
19	TAS2R19	5	3088	0.0016	0	8186	0	case	0.0015
20	METTL5	5	3088	0.0016	0	8186	0	case	0.0015
21	MUC22	3	3090	0.0009699	40	8146	0.0049	ctrl	0.0016
22	OPTN	18	3075	0.0058	16	8170	0.002	case	0.0017
23	TBK1	20	3073	0.0065	19	8167	0.0023	case	0.0018
24	TRAF3IP2	14	3079	0.0045	10	8176	0.0012	case	0.0019
25	CCDC74B	14	3079	0.0045	10	8176	0.0012	case	0.0019
26	CYR61	9	3084	0.0029	4	8182	0.0004886	case	0.002
27	SLC24A4	15	3078	0.0048	12	8174	0.0015	case	0.002
28	ZNF345	15	3078	0.0048	12	8174	0.0015	case	0.002
29	PADI2	2	3091	0.0006466	34	8152	0.0042	ctrl	0.0021
30	STS	0	3093	0	20	8166	0.0024	ctrl	0.0021
31	CNOT1	24	3069	0.0078	26	8160	0.0032	case	0.0021
32	APBB1IP	0	3093	0	21	8165	0.0026	ctrl	0.0022
33	TMEM86A	6	3087	0.0019	1	8185	0.0001222	case	0.0023
34	USP27X	6	3087	0.0019	1	8185	0.0001222	case	0.0023
35	ANGPTL4	6	3087	0.0019	1	8185	0.0001222	case	0.0023
36	MAGEB16	6	3087	0.0019	1	8185	0.0001222	case	0.0023
37	STK38L	8	3085	0.0026	3	8183	0.0003665	case	0.0023
38	SIRPB1	1	3092	0.0003233	27	8159	0.0033	ctrl	0.0023
39	VAMP5	7	3086	0.0023	2	8184	0.0002443	case	0.0024
40	MMADHC	7	3086	0.0023	2	8184	0.0002443	case	0.0024
41	NID2	8	3085	0.0026	61	8125	0.0075	ctrl	0.0026
42	ZNF425	16	3077	0.0052	14	8172	0.0017	case	0.0032
43	TRMT10C	0	3093	0	19	8167	0.0023	ctrl	0.0034
44	UXS1	0	3093	0	19	8167	0.0023	ctrl	0.0034
45	RFPL3	10	3083	0.0032	6	8180	0.000733	case	0.0035
46	SLC22A25	10	3083	0.0032	6	8180	0.000733	case	0.0035
47	CDH24	13	3080	0.0042	10	8176	0.0012	case	0.0037
48	HIPK1	20	3073	0.0065	21	8165	0.0026	case	0.0042
49	DAK	16	3077	0.0052	15	8171	0.0018	case	0.0042
50	ITGB2	18	3075	0.0058	18	8168	0.0022	case	0.0043
51	BNC1	2	3091	0.0006466	30	8156	0.0037	ctrl	0.0047
52	TEKT5	2	3091	0.0006466	30	8156	0.0037	ctrl	0.0047
53	BIN2	12	3081	0.0039	9	8177	0.0011	case	0.0051
54	ZNF165	12	3081	0.0039	9	8177	0.0011	case	0.0051
55	CIR1	8	3085	0.0026	4	8182	0.0004886	case	0.0052
56	FAM110B	8	3085	0.0026	4	8182	0.0004886	case	0.0052
57	TPH1	8	3085	0.0026	4	8182	0.0004886	case	0.0052
58	C19orf44	8	3085	0.0026	4	8182	0.0004886	case	0.0052
59	SMARCA1	13	3080	0.0042	11	8175	0.0013	case	0.0055
60	XRCC3	13	3080	0.0042	11	8175	0.0013	case	0.0055
61	SMS	4	3089	0.0013	0	8186	0	case	0.0056
62	SUMO1	4	3089	0.0013	0	8186	0	case	0.0056
63	CTAGE8	4	3089	0.0013	0	8186	0	case	0.0056
64	CXorf21	4	3089	0.0013	0	8186	0	case	0.0056
65	GPHA2	4	3089	0.0013	0	8186	0	case	0.0056
66	TMEM64	0	3093	0	17	8169	0.0021	ctrl	0.0057
67	PRSS53	0	3093	0	17	8169	0.0021	ctrl	0.0057
68	MAPKAPK5	0	3093	0	17	8169	0.0021	ctrl	0.0057
69	TGFBR2	0	3093	0	17	8169	0.0021	ctrl	0.0057
70	PTK2B	4	3089	0.0013	40	8146	0.0049	ctrl	0.0059
71	PIK3R2	0	3093	0	18	8168	0.0022	ctrl	0.0059
72	TMEM135	0	3093	0	18	8168	0.0022	ctrl	0.0059
73	SLC35D3	7	3086	0.0023	3	8183	0.0003665	case	0.0062
74	PRPS1L1	7	3086	0.0023	3	8183	0.0003665	case	0.0062
75	ALAD	7	3086	0.0023	3	8183	0.0003665	case	0.0062
76	EFNB2	7	3086	0.0023	3	8183	0.0003665	case	0.0062
77	SLFNL1	14	3079	0.0045	12	8174	0.0015	case	0.0065
78	ZNF599	14	3079	0.0045	12	8174	0.0015	case	0.0065
79	VPS13B	26	3067	0.0084	122	8064	0.0149	ctrl	0.0069
80	HBZ	6	3087	0.0019	2	8184	0.0002443	case	0.007
81	C11orf94	6	3087	0.0019	2	8184	0.0002443	case	0.007
82	ANKFN1	19	3074	0.0061	21	8165	0.0026	case	0.007
83	KLF2	5	3088	0.0016	1	8185	0.0001222	case	0.0072
84	CALCA	5	3088	0.0016	1	8185	0.0001222	case	0.0072
85	RAE1	11	3082	0.0036	8	8178	0.0009773	case	0.0073
86	ZNF737	11	3082	0.0036	8	8178	0.0009773	case	0.0073
87	SLC34A2	2	3091	0.0006466	28	8158	0.0034	ctrl	0.0073
88	LMAN1L	2	3091	0.0006466	28	8158	0.0034	ctrl	0.0073
89	ZDHHC5	2	3091	0.0006466	28	8158	0.0034	ctrl	0.0073
90	SSTR4	12	3081	0.0039	10	8176	0.0012	case	0.0073
91	FGGY	12	3081	0.0039	10	8176	0.0012	case	0.0073
92	ZNF227	17	3076	0.0055	18	8168	0.0022	case	0.0074
93	PET112	14	3079	0.0045	13	8173	0.0016	case	0.008
94	SMAD1	9	3084	0.0029	6	8180	0.000733	case	0.0081
95	LZTFL1	9	3084	0.0029	6	8180	0.000733	case	0.0081
96	CCDC42B	9	3084	0.0029	6	8180	0.000733	case	0.0081
97	VSIG10L	4	3089	0.0013	38	8148	0.0046	ctrl	0.0083
98	COL4A1	4	3089	0.0013	38	8148	0.0046	ctrl	0.0083
99	IRAK2	16	3077	0.0052	16	8170	0.002	case	0.0084
100	ZNF335	24	3069	0.0078	30	8156	0.0037	case	0.0085
101	PARP4	34	3059	0.011	49	8137	0.006	case	0.0089
102	ADH7	1	3092	0.0003233	22	8164	0.0027	ctrl	0.0091
103	LDHD	1	3092	0.0003233	22	8164	0.0027	ctrl	0.0091
104	XYLB	1	3092	0.0003233	22	8164	0.0027	ctrl	0.0091
105	EXOC5	0	3093	0	16	8170	0.002	ctrl	0.0094
106	SPATA22	0	3093	0	16	8170	0.002	ctrl	0.0094
107	MRPS15	0	3093	0	16	8170	0.002	ctrl	0.0094
108	PRMT6	0	3093	0	16	8170	0.002	ctrl	0.0094
109	ZBTB25	0	3093	0	16	8170	0.002	ctrl	0.0094
110	DNMT3A	22	3071	0.0071	27	8159	0.0033	case	0.0094
111	CHIA	1	3092	0.0003233	23	8163	0.0028	ctrl	0.0096
112	ZNF800	11	3082	0.0036	9	8177	0.0011	case	0.01
113	C1S	8	3085	0.0026	5	8181	0.0006108	case	0.0103
114	GRIN2D	8	3085	0.0026	5	8181	0.0006108	case	0.0103
115	C14orf37	8	3085	0.0026	5	8181	0.0006108	case	0.0103
116	PLEK2	8	3085	0.0026	5	8181	0.0006108	case	0.0103
117	NDUFV1	14	3079	0.0045	14	8172	0.0017	case	0.0106
118	HEATR1	15	3078	0.0048	80	8106	0.0098	ctrl	0.0106
119	PRELP	10	3083	0.0032	7	8179	0.0008551	case	0.0107
120	CCT6A	10	3083	0.0032	7	8179	0.0008551	case	0.0107
121	C2orf42	10	3083	0.0032	7	8179	0.0008551	case	0.0107
122	ZNF583	10	3083	0.0032	7	8179	0.0008551	case	0.0107
123	ZSWIM8	10	3083	0.0032	61	8125	0.0075	ctrl	0.0107
124	OBSCN	158	2935	0.0511	327	7859	0.0399	case	0.0107
125	ARFGAP2	13	3080	0.0042	12	8174	0.0015	case	0.0113
126	CCDC147	13	3080	0.0042	12	8174	0.0015	case	0.0113
127	EXOSC10	18	3075	0.0058	21	8165	0.0026	case	0.0116
128	ESYT1	18	3075	0.0058	21	8165	0.0026	case	0.0116
129	ST5	5	3088	0.0016	40	8146	0.0049	ctrl	0.0116
130	ARID2	5	3088	0.0016	40	8146	0.0049	ctrl	0.0116
131	RIMS2	5	3088	0.0016	40	8146	0.0049	ctrl	0.0116
132	FLRT2	3	3090	0.0009699	31	8155	0.0038	ctrl	0.0118
133	PARD3	9	3084	0.0029	56	8130	0.0068	ctrl	0.0119
134	ABCA5	9	3084	0.0029	56	8130	0.0068	ctrl	0.0119
135	CC2D1B	4	3089	0.0013	36	8150	0.0044	ctrl	0.012
136	ARAP3	28	3065	0.0091	39	8147	0.0048	case	0.0126
137	SETD1A	25	3068	0.0081	34	8152	0.0042	case	0.0126
138	ARHGAP31	21	3072	0.0068	26	8160	0.0032	case	0.0128
139	FAM46B	7	3086	0.0023	4	8182	0.0004886	case	0.0129
140	G6PC	7	3086	0.0023	4	8182	0.0004886	case	0.0129
141	CXCR4	7	3086	0.0023	4	8182	0.0004886	case	0.0129
142	URM1	7	3086	0.0023	4	8182	0.0004886	case	0.0129
143	C9orf96	7	3086	0.0023	4	8182	0.0004886	case	0.0129
144	DSPP	11	3082	0.0036	64	8122	0.0078	ctrl	0.013
145	AHI1	8	3085	0.0026	52	8134	0.0064	ctrl	0.0131
146	ARAP1	8	3085	0.0026	52	8134	0.0064	ctrl	0.0131
147	KCNB2	10	3083	0.0032	8	8178	0.0009773	case	0.014
148	MGME1	10	3083	0.0032	8	8178	0.0009773	case	0.014
149	ALPPL2	10	3083	0.0032	8	8178	0.0009773	case	0.014
150	SPTB	34	3059	0.011	51	8135	0.0062	case	0.014
151	GBP2	15	3078	0.0048	16	8170	0.002	case	0.014
152	KRT32	15	3078	0.0048	16	8170	0.002	case	0.014
153	ADAMTS4	19	3074	0.0061	23	8163	0.0028	case	0.0142
154	USP31	19	3074	0.0061	23	8163	0.0028	case	0.0142
155	ADRA1B	13	3080	0.0042	13	8173	0.0016	case	0.0144
156	ANGPT4	13	3080	0.0042	13	8173	0.0016	case	0.0144
157	CTH	11	3082	0.0036	10	8176	0.0012	case	0.0145
158	TMEM25	11	3082	0.0036	10	8176	0.0012	case	0.0145
159	TUBA3C	1	3092	0.0003233	21	8165	0.0026	ctrl	0.0145
160	TIGD7	1	3092	0.0003233	21	8165	0.0026	ctrl	0.0145
161	PDZD2	40	3053	0.0129	64	8122	0.0078	case	0.0147
162	GLT1D1	0	3093	0	14	8172	0.0017	ctrl	0.0155
163	MBD3	0	3093	0	14	8172	0.0017	ctrl	0.0155
164	ST6GALNAC4	0	3093	0	14	8172	0.0017	ctrl	0.0155
165	FBXL22	0	3093	0	14	8172	0.0017	ctrl	0.0155
166	PDLIM4	0	3093	0	14	8172	0.0017	ctrl	0.0155
167	LFNG	0	3093	0	14	8172	0.0017	ctrl	0.0155
168	PARP16	0	3093	0	14	8172	0.0017	ctrl	0.0155
169	CADM2	0	3093	0	14	8172	0.0017	ctrl	0.0155
170	NUBPL	0	3093	0	14	8172	0.0017	ctrl	0.0155
171	SGTA	0	3093	0	14	8172	0.0017	ctrl	0.0155
172	PRPSAP1	0	3093	0	14	8172	0.0017	ctrl	0.0155
173	GJB4	0	3093	0	14	8172	0.0017	ctrl	0.0155
174	KRT86	0	3093	0	14	8172	0.0017	ctrl	0.0155
175	DYNC1H1	18	3075	0.0058	88	8098	0.0108	ctrl	0.0157
176	HABP2	17	3076	0.0055	20	8166	0.0024	case	0.0157
177	INPP5F	17	3076	0.0055	20	8166	0.0024	case	0.0157
178	PCDH15	16	3077	0.0052	80	8106	0.0098	ctrl	0.0158
179	WDR62	14	3079	0.0045	74	8112	0.009	ctrl	0.0158
180	TMC2	6	3087	0.0019	44	8142	0.0054	ctrl	0.0159
181	ARHGEF40	6	3087	0.0019	44	8142	0.0054	ctrl	0.0159
182	GPR173	6	3087	0.0019	3	8183	0.0003665	case	0.016
183	RPL14	6	3087	0.0019	3	8183	0.0003665	case	0.016
184	RAD51	6	3087	0.0019	3	8183	0.0003665	case	0.016
185	KLF5	6	3087	0.0019	3	8183	0.0003665	case	0.016
186	LILRB3	6	3087	0.0019	3	8183	0.0003665	case	0.016
187	KPNB1	6	3087	0.0019	3	8183	0.0003665	case	0.016
188	COMMD7	6	3087	0.0019	3	8183	0.0003665	case	0.016
189	KATNBL1	6	3087	0.0019	3	8183	0.0003665	case	0.016
190	NEK1	32	3061	0.0103	48	8138	0.0059	case	0.0162
191	NOL4	0	3093	0	15	8171	0.0018	ctrl	0.0163
192	NOL12	0	3093	0	15	8171	0.0018	ctrl	0.0163
193	LAMP3	0	3093	0	15	8171	0.0018	ctrl	0.0163
194	OR10H5	0	3093	0	15	8171	0.0018	ctrl	0.0163
195	CD3G	0	3093	0	15	8171	0.0018	ctrl	0.0163
196	SERPINA6	12	3081	0.0039	11	8175	0.0013	case	0.0163
197	SLC25A25	12	3081	0.0039	11	8175	0.0013	case	0.0163
198	RMND5B	12	3081	0.0039	11	8175	0.0013	case	0.0163
199	PNKP	5	3088	0.0016	38	8148	0.0046	ctrl	0.0167
200	HECW2	5	3088	0.0016	39	8147	0.0048	ctrl	0.0167
201	FBXO24	2	3091	0.0006466	25	8161	0.0031	ctrl	0.0167
202	LPO	2	3091	0.0006466	25	8161	0.0031	ctrl	0.0167
203	PYHIN1	2	3091	0.0006466	25	8161	0.0031	ctrl	0.0167
204	PAXIP1	2	3091	0.0006466	25	8161	0.0031	ctrl	0.0167
205	LILRA2	2	3091	0.0006466	25	8161	0.0031	ctrl	0.0167
206	KRT10	2	3091	0.0006466	25	8161	0.0031	ctrl	0.0167
207	ZFAT	27	3066	0.0087	38	8148	0.0046	case	0.0168
208	RASGRP3	4	3089	0.0013	34	8152	0.0042	ctrl	0.0173
209	MYO5C	11	3082	0.0036	62	8124	0.0076	ctrl	0.0173
210	FAM189B	2	3091	0.0006466	26	8160	0.0032	ctrl	0.0174
211	ICAM3	2	3091	0.0006466	26	8160	0.0032	ctrl	0.0174
212	FAM73A	2	3091	0.0006466	26	8160	0.0032	ctrl	0.0174
213	MIER2	15	3078	0.0048	17	8169	0.0021	case	0.0174
214	SUPT6H	30	3063	0.0097	44	8142	0.0054	case	0.0178
215	NOC4L	4	3089	0.0013	35	8151	0.0043	ctrl	0.0178
216	COL5A3	13	3080	0.0042	70	8116	0.0086	ctrl	0.0182
217	SMARCA2	8	3085	0.0026	51	8135	0.0062	ctrl	0.0182
218	PYGL	16	3077	0.0052	18	8168	0.0022	case	0.0188
219	SLC15A2	16	3077	0.0052	18	8168	0.0022	case	0.0188
220	CLVS2	5	3088	0.0016	2	8184	0.0002443	case	0.0194
221	LCN6	5	3088	0.0016	2	8184	0.0002443	case	0.0194
222	PPP1R2	5	3088	0.0016	2	8184	0.0002443	case	0.0194
223	KRTAP12-2	5	3088	0.0016	2	8184	0.0002443	case	0.0194
224	HIST1H2BL	5	3088	0.0016	2	8184	0.0002443	case	0.0194
225	CNRIP1	5	3088	0.0016	2	8184	0.0002443	case	0.0194
226	PTTG2	5	3088	0.0016	2	8184	0.0002443	case	0.0194
227	ENOPH1	5	3088	0.0016	2	8184	0.0002443	case	0.0194
228	SMUG1	5	3088	0.0016	2	8184	0.0002443	case	0.0194
229	WDR87	43	3050	0.0139	168	8018	0.0205	ctrl	0.0195
230	MYO9B	10	3083	0.0032	57	8129	0.007	ctrl	0.0195
231	CCDC17	20	3073	0.0065	26	8160	0.0032	case	0.0196
232	ANKRD35	20	3073	0.0065	26	8160	0.0032	case	0.0196
233	STX2	10	3083	0.0032	9	8177	0.0011	case	0.0196
234	BRE	10	3083	0.0032	9	8177	0.0011	case	0.0196
235	MTNR1A	10	3083	0.0032	9	8177	0.0011	case	0.0196
236	SIRT2	10	3083	0.0032	9	8177	0.0011	case	0.0196
237	BCCIP	10	3083	0.0032	9	8177	0.0011	case	0.0196
238	ANKRA2	10	3083	0.0032	9	8177	0.0011	case	0.0196
239	CYP4F22	10	3083	0.0032	9	8177	0.0011	case	0.0196
240	CRAT	10	3083	0.0032	9	8177	0.0011	case	0.0196
241	OR10H2	10	3083	0.0032	9	8177	0.0011	case	0.0196
242	PPP5C	10	3083	0.0032	9	8177	0.0011	case	0.0196
243	CCDC102B	10	3083	0.0032	9	8177	0.0011	case	0.0196
244	ZBTB17	14	3079	0.0045	15	8171	0.0018	case	0.0196
245	MAML2	7	3086	0.0023	46	8140	0.0056	ctrl	0.0198
246	ZNF92	12	3081	0.0039	12	8174	0.0015	case	0.02
247	TOR1AIP1	12	3081	0.0039	12	8174	0.0015	case	0.02
248	BMP15	9	3084	0.0029	7	8179	0.0008551	case	0.02
249	TLK1	9	3084	0.0029	7	8179	0.0008551	case	0.02
250	ASXL3	12	3081	0.0039	64	8122	0.0078	ctrl	0.0203
251	C21orf62	3	3090	0.0009699	0	8186	0	case	0.0206
252	RFPL4AL1	3	3090	0.0009699	0	8186	0	case	0.0206
253	C17orf77	3	3090	0.0009699	0	8186	0	case	0.0206
254	C6orf1	3	3090	0.0009699	0	8186	0	case	0.0206
255	NPPA	3	3090	0.0009699	0	8186	0	case	0.0206
256	C11orf86	3	3090	0.0009699	0	8186	0	case	0.0206
257	RAP1B	3	3090	0.0009699	0	8186	0	case	0.0206
258	UBE2N	3	3090	0.0009699	0	8186	0	case	0.0206
259	C8orf82	3	3090	0.0009699	0	8186	0	case	0.0206
260	ARL4A	3	3090	0.0009699	0	8186	0	case	0.0206
261	NUP160	25	3068	0.0081	36	8150	0.0044	case	0.0211
262	CHTF18	9	3084	0.0029	53	8133	0.0065	ctrl	0.0219
263	MTR	6	3087	0.0019	42	8144	0.0051	ctrl	0.022
264	VWA2	6	3087	0.0019	42	8144	0.0051	ctrl	0.022
265	CTNND1	6	3087	0.0019	42	8144	0.0051	ctrl	0.022
266	C6orf15	4	3089	0.0013	1	8185	0.0001222	case	0.022
267	C3orf58	4	3089	0.0013	1	8185	0.0001222	case	0.022
268	S100A2	4	3089	0.0013	1	8185	0.0001222	case	0.022
269	C19orf35	4	3089	0.0013	1	8185	0.0001222	case	0.022
270	C9orf41	4	3089	0.0013	1	8185	0.0001222	case	0.022
271	TARBP1	23	3070	0.0074	32	8154	0.0039	case	0.0222
272	AGAP1	18	3075	0.0058	23	8163	0.0028	case	0.0224
273	IQCE	18	3075	0.0058	23	8163	0.0028	case	0.0224
274	RNF112	1	3092	0.0003233	19	8167	0.0023	ctrl	0.0224
275	BCL6B	1	3092	0.0003233	19	8167	0.0023	ctrl	0.0224
276	LIMS2	1	3092	0.0003233	19	8167	0.0023	ctrl	0.0224
277	POU2F2	1	3092	0.0003233	19	8167	0.0023	ctrl	0.0224
278	ECHS1	1	3092	0.0003233	19	8167	0.0023	ctrl	0.0224
279	ARPP21	1	3092	0.0003233	19	8167	0.0023	ctrl	0.0224
280	CD82	1	3092	0.0003233	19	8167	0.0023	ctrl	0.0224
281	FAM63A	1	3092	0.0003233	19	8167	0.0023	ctrl	0.0224
282	ABL2	21	3072	0.0068	28	8158	0.0034	case	0.0233
283	GLIS3	21	3072	0.0068	28	8158	0.0034	case	0.0233
284	FSD1L	5	3088	0.0016	37	8149	0.0045	ctrl	0.0235
285	SLC10A2	14	3079	0.0045	16	8170	0.002	case	0.0236
286	OTOP1	14	3079	0.0045	16	8170	0.002	case	0.0236
287	CALD1	14	3079	0.0045	16	8170	0.002	case	0.0236
288	PMP22	7	3086	0.0023	5	8181	0.0006108	case	0.0238
289	SPOCK2	7	3086	0.0023	5	8181	0.0006108	case	0.0238
290	SLC38A2	7	3086	0.0023	5	8181	0.0006108	case	0.0238
291	DNAJC9	7	3086	0.0023	5	8181	0.0006108	case	0.0238
292	TSEN34	7	3086	0.0023	5	8181	0.0006108	case	0.0238
293	BPHL	7	3086	0.0023	5	8181	0.0006108	case	0.0238
294	PDE1A	7	3086	0.0023	5	8181	0.0006108	case	0.0238
295	UBAC1	7	3086	0.0023	5	8181	0.0006108	case	0.0238
296	P2RY4	7	3086	0.0023	5	8181	0.0006108	case	0.0238
297	RGS7	7	3086	0.0023	5	8181	0.0006108	case	0.0238
298	METTL14	7	3086	0.0023	5	8181	0.0006108	case	0.0238
299	PINK1	1	3092	0.0003233	20	8166	0.0024	ctrl	0.0239
300	BVES	1	3092	0.0003233	20	8166	0.0024	ctrl	0.0239
301	MTFMT	1	3092	0.0003233	20	8166	0.0024	ctrl	0.0239
302	ING1	1	3092	0.0003233	20	8166	0.0024	ctrl	0.0239
303	CTDP1	19	3074	0.0061	24	8162	0.0029	case	0.0243
304	DCHS1	25	3068	0.0081	109	8077	0.0133	ctrl	0.0246
305	SP4	4	3089	0.0013	32	8154	0.0039	ctrl	0.025
306	POLG2	4	3089	0.0013	32	8154	0.0039	ctrl	0.025
307	BRPF3	4	3089	0.0013	33	8153	0.004	ctrl	0.0252
308	TCEB3	4	3089	0.0013	33	8153	0.004	ctrl	0.0252
309	MEF2A	4	3089	0.0013	33	8153	0.004	ctrl	0.0252
310	ILK	2	3091	0.0006466	23	8163	0.0028	ctrl	0.0254
311	C6orf132	2	3091	0.0006466	23	8163	0.0028	ctrl	0.0254
312	SPNS3	2	3091	0.0006466	23	8163	0.0028	ctrl	0.0254
313	TCF12	2	3091	0.0006466	23	8163	0.0028	ctrl	0.0254
314	CCM2L	2	3091	0.0006466	23	8163	0.0028	ctrl	0.0254
315	ZNF224	2	3091	0.0006466	24	8162	0.0029	ctrl	0.0255
316	LAP3	3	3090	0.0009699	28	8158	0.0034	ctrl	0.0257
317	SRP68	3	3090	0.0009699	28	8158	0.0034	ctrl	0.0257
318	SKI	3	3090	0.0009699	28	8158	0.0034	ctrl	0.0257
319	ZNF655	3	3090	0.0009699	28	8158	0.0034	ctrl	0.0257
320	KDM4E	3	3090	0.0009699	28	8158	0.0034	ctrl	0.0257
321	INPP4B	3	3090	0.0009699	28	8158	0.0034	ctrl	0.0257
322	RNF128	0	3093	0	13	8173	0.0016	ctrl	0.0257
323	AKR1B15	0	3093	0	13	8173	0.0016	ctrl	0.0257
324	GALNT13	0	3093	0	13	8173	0.0016	ctrl	0.0257
325	RUNX3	0	3093	0	13	8173	0.0016	ctrl	0.0257
326	OR10A4	0	3093	0	13	8173	0.0016	ctrl	0.0257
327	CD27	0	3093	0	13	8173	0.0016	ctrl	0.0257
328	CCR8	0	3093	0	13	8173	0.0016	ctrl	0.0257
329	CLEC1B	0	3093	0	13	8173	0.0016	ctrl	0.0257
330	TRPM5	26	3067	0.0084	39	8147	0.0048	case	0.0259
331	PTPRG	26	3067	0.0084	39	8147	0.0048	case	0.0259
332	UBR3	10	3083	0.0032	56	8130	0.0068	ctrl	0.0261
333	AGMO	19	3074	0.0061	25	8161	0.0031	case	0.0264
334	MAP3K4	3	3090	0.0009699	29	8157	0.0035	ctrl	0.0267
335	SAMHD1	3	3090	0.0009699	29	8157	0.0035	ctrl	0.0267
336	NEXN	17	3076	0.0055	21	8165	0.0026	case	0.0268
337	TNK2	17	3076	0.0055	21	8165	0.0026	case	0.0268
338	SCAMP3	9	3084	0.0029	8	8178	0.0009773	case	0.027
339	ACPP	9	3084	0.0029	8	8178	0.0009773	case	0.027
340	SNAI3	9	3084	0.0029	8	8178	0.0009773	case	0.027
341	TALDO1	9	3084	0.0029	8	8178	0.0009773	case	0.027
342	SGCG	9	3084	0.0029	8	8178	0.0009773	case	0.027
343	FAF2	9	3084	0.0029	8	8178	0.0009773	case	0.027
344	UGT2A3	9	3084	0.0029	8	8178	0.0009773	case	0.027
345	CXorf30	9	3084	0.0029	8	8178	0.0009773	case	0.027
346	DPAGT1	9	3084	0.0029	8	8178	0.0009773	case	0.027
347	COL5A2	30	3063	0.0097	46	8140	0.0056	case	0.0273
348	ZNF446	13	3080	0.0042	14	8172	0.0017	case	0.0278
349	CREB3	13	3080	0.0042	14	8172	0.0017	case	0.0278
350	DHCR7	13	3080	0.0042	14	8172	0.0017	case	0.0278
351	POLR1E	11	3082	0.0036	11	8175	0.0013	case	0.0281
352	HCLS1	11	3082	0.0036	11	8175	0.0013	case	0.0281
353	ASB5	11	3082	0.0036	11	8175	0.0013	case	0.0281
354	ZNF324	11	3082	0.0036	11	8175	0.0013	case	0.0281
355	FRMPD1	9	3084	0.0029	51	8135	0.0062	ctrl	0.0295
356	CORO7	22	3071	0.0071	31	8155	0.0038	case	0.0295
357	FADS6	8	3085	0.0026	6	8180	0.000733	case	0.0295
358	PTDSS2	8	3085	0.0026	6	8180	0.000733	case	0.0295
359	XKR8	8	3085	0.0026	6	8180	0.000733	case	0.0295
360	ADTRP	8	3085	0.0026	6	8180	0.000733	case	0.0295
361	TK2	8	3085	0.0026	6	8180	0.000733	case	0.0295
362	RASSF2	8	3085	0.0026	6	8180	0.000733	case	0.0295
363	2019-03-02	8	3085	0.0026	6	8180	0.000733	case	0.0295
364	CCDC102A	8	3085	0.0026	6	8180	0.000733	case	0.0295
365	GNL1	8	3085	0.0026	6	8180	0.000733	case	0.0295
366	MRPL9	15	3078	0.0048	18	8168	0.0022	case	0.0296
367	TIAM1	9	3084	0.0029	52	8134	0.0064	ctrl	0.0298
368	HPS5	9	3084	0.0029	52	8134	0.0064	ctrl	0.0298
369	ATP13A2	19	3074	0.0061	26	8160	0.0032	case	0.0299
370	SH3D19	19	3074	0.0061	26	8160	0.0032	case	0.0299
371	MRVI1	19	3074	0.0061	26	8160	0.0032	case	0.0299
372	DNAJC16	19	3074	0.0061	26	8160	0.0032	case	0.0299
373	ATAD2B	17	3076	0.0055	22	8164	0.0027	case	0.0301
374	KIF27	6	3087	0.0019	40	8146	0.0049	ctrl	0.0303
375	FKBP15	6	3087	0.0019	40	8146	0.0049	ctrl	0.0303
376	FHOD3	11	3082	0.0036	58	8128	0.0071	ctrl	0.0305
377	LGALSL	6	3087	0.0019	4	8182	0.0004886	case	0.0309
378	SLC35E1	6	3087	0.0019	4	8182	0.0004886	case	0.0309
379	PPT1	6	3087	0.0019	4	8182	0.0004886	case	0.0309
380	MPZ	6	3087	0.0019	4	8182	0.0004886	case	0.0309
381	CCDC97	6	3087	0.0019	4	8182	0.0004886	case	0.0309
382	KCNMB1	6	3087	0.0019	4	8182	0.0004886	case	0.0309
383	RBM3	6	3087	0.0019	4	8182	0.0004886	case	0.0309
384	HIST1H2BJ	6	3087	0.0019	4	8182	0.0004886	case	0.0309
385	RNASE1	6	3087	0.0019	4	8182	0.0004886	case	0.0309
386	TAS2R39	6	3087	0.0019	4	8182	0.0004886	case	0.0309
387	OR6C1	6	3087	0.0019	4	8182	0.0004886	case	0.0309
388	ZNF862	20	3073	0.0065	27	8159	0.0033	case	0.0315
389	ZNF263	20	3073	0.0065	27	8159	0.0033	case	0.0315
390	KLHL6	13	3080	0.0042	15	8171	0.0018	case	0.0325
391	PLD3	13	3080	0.0042	15	8171	0.0018	case	0.0325
392	DGCR2	13	3080	0.0042	15	8171	0.0018	case	0.0325
393	TRAFD1	13	3080	0.0042	15	8171	0.0018	case	0.0325
394	AGBL4	13	3080	0.0042	15	8171	0.0018	case	0.0325
395	PCDHB8	13	3080	0.0042	15	8171	0.0018	case	0.0325
396	SLC39A12	5	3088	0.0016	35	8151	0.0043	ctrl	0.0331
397	TNKS2	5	3088	0.0016	36	8150	0.0044	ctrl	0.0336
398	SLC4A2	5	3088	0.0016	36	8150	0.0044	ctrl	0.0336
399	PLD1	23	3070	0.0074	33	8153	0.004	case	0.0341
400	HRNR	45	3048	0.0145	80	8106	0.0098	case	0.0342
401	ZNF665	15	3078	0.0048	19	8167	0.0023	case	0.0344
402	PER3	12	3081	0.0039	61	8125	0.0075	ctrl	0.035
403	KCNK1	1	3092	0.0003233	17	8169	0.0021	ctrl	0.0351
404	GC	1	3092	0.0003233	17	8169	0.0021	ctrl	0.0351
405	RFPL2	1	3092	0.0003233	17	8169	0.0021	ctrl	0.0351
406	TFDP2	1	3092	0.0003233	17	8169	0.0021	ctrl	0.0351
407	CREB3L4	1	3092	0.0003233	17	8169	0.0021	ctrl	0.0351
408	MAGEC2	1	3092	0.0003233	17	8169	0.0021	ctrl	0.0351
409	GPS2	1	3092	0.0003233	17	8169	0.0021	ctrl	0.0351
410	KLHL5	11	3082	0.0036	12	8174	0.0015	case	0.0353
411	VAX2	11	3082	0.0036	12	8174	0.0015	case	0.0353
412	PDZD3	11	3082	0.0036	12	8174	0.0015	case	0.0353
413	TMEM79	11	3082	0.0036	12	8174	0.0015	case	0.0353
414	CXXC11	11	3082	0.0036	12	8174	0.0015	case	0.0353
415	ESRP2	11	3082	0.0036	12	8174	0.0015	case	0.0353
416	ZNF510	11	3082	0.0036	12	8174	0.0015	case	0.0353
417	PIGW	11	3082	0.0036	12	8174	0.0015	case	0.0353
418	LRRN1	11	3082	0.0036	12	8174	0.0015	case	0.0353
419	DDX50	11	3082	0.0036	12	8174	0.0015	case	0.0353
420	SIGLEC10	4	3089	0.0013	31	8155	0.0038	ctrl	0.0357
421	AP3B1	4	3089	0.0013	31	8155	0.0038	ctrl	0.0357
422	NOP9	4	3089	0.0013	31	8155	0.0038	ctrl	0.0357
423	DENND2A	4	3089	0.0013	31	8155	0.0038	ctrl	0.0357
424	UBASH3A	4	3089	0.0013	31	8155	0.0038	ctrl	0.0357
425	SLC12A8	18	3075	0.0058	24	8162	0.0029	case	0.0358
426	ZBTB11	18	3075	0.0058	24	8162	0.0029	case	0.0358
427	ELL2	1	3092	0.0003233	18	8168	0.0022	ctrl	0.0358
428	CT47B1	1	3092	0.0003233	18	8168	0.0022	ctrl	0.0358
429	CLK2	1	3092	0.0003233	18	8168	0.0022	ctrl	0.0358
430	CPA1	1	3092	0.0003233	18	8168	0.0022	ctrl	0.0358
431	KRBA2	1	3092	0.0003233	18	8168	0.0022	ctrl	0.0358
432	MB21D1	1	3092	0.0003233	18	8168	0.0022	ctrl	0.0358
433	GSDMD	1	3092	0.0003233	18	8168	0.0022	ctrl	0.0358
434	LSP1	1	3092	0.0003233	18	8168	0.0022	ctrl	0.0358
435	ACAP3	1	3092	0.0003233	18	8168	0.0022	ctrl	0.0358
436	ROM1	1	3092	0.0003233	18	8168	0.0022	ctrl	0.0358
437	NEO1	23	3070	0.0074	34	8152	0.0042	case	0.0362
438	FES	16	3077	0.0052	20	8166	0.0024	case	0.0372
439	DVL2	16	3077	0.0052	20	8166	0.0024	case	0.0372
440	KIAA1841	16	3077	0.0052	20	8166	0.0024	case	0.0372
441	RGS9	16	3077	0.0052	20	8166	0.0024	case	0.0372
442	GARNL3	16	3077	0.0052	20	8166	0.0024	case	0.0372
443	TOPAZ1	46	3047	0.0149	83	8103	0.0101	case	0.0374
444	NOL6	7	3086	0.0023	43	8143	0.0053	ctrl	0.0376
445	CNGB1	7	3086	0.0023	43	8143	0.0053	ctrl	0.0376
446	FSD2	3	3090	0.0009699	26	8160	0.0032	ctrl	0.0377
447	CLK3	3	3090	0.0009699	26	8160	0.0032	ctrl	0.0377
448	PARP1	3	3090	0.0009699	26	8160	0.0032	ctrl	0.0377
449	GNPAT	3	3090	0.0009699	26	8160	0.0032	ctrl	0.0377
450	OTOA	3	3090	0.0009699	26	8160	0.0032	ctrl	0.0377
451	MCOLN2	3	3090	0.0009699	26	8160	0.0032	ctrl	0.0377
452	GPR17	2	3091	0.0006466	22	8164	0.0027	ctrl	0.0379
453	EYA1	2	3091	0.0006466	22	8164	0.0027	ctrl	0.0379
454	FNTB	8	3085	0.0026	7	8179	0.0008551	case	0.038
455	DLG3	8	3085	0.0026	7	8179	0.0008551	case	0.038
456	LIPK	8	3085	0.0026	7	8179	0.0008551	case	0.038
457	CHRNA10	8	3085	0.0026	7	8179	0.0008551	case	0.038
458	CWC25	8	3085	0.0026	7	8179	0.0008551	case	0.038
459	GXYLT1	8	3085	0.0026	7	8179	0.0008551	case	0.038
460	PRSS58	8	3085	0.0026	7	8179	0.0008551	case	0.038
461	ASPRV1	8	3085	0.0026	7	8179	0.0008551	case	0.038
462	HMOX2	8	3085	0.0026	7	8179	0.0008551	case	0.038
463	TATDN3	8	3085	0.0026	7	8179	0.0008551	case	0.038
464	TRIM22	8	3085	0.0026	7	8179	0.0008551	case	0.038
465	P2RY12	8	3085	0.0026	7	8179	0.0008551	case	0.038
466	ZWINT	8	3085	0.0026	7	8179	0.0008551	case	0.038
467	GSPT2	8	3085	0.0026	7	8179	0.0008551	case	0.038
468	KATNAL1	8	3085	0.0026	7	8179	0.0008551	case	0.038
469	HIPK3	3	3090	0.0009699	27	8159	0.0033	ctrl	0.0381
470	PLEKHH3	3	3090	0.0009699	27	8159	0.0033	ctrl	0.0381
471	ITGA5	3	3090	0.0009699	27	8159	0.0033	ctrl	0.0381
472	CD1C	3	3090	0.0009699	27	8159	0.0033	ctrl	0.0381
473	ACOX3	21	3072	0.0068	30	8156	0.0037	case	0.0393
474	CORO7-PAM16	23	3070	0.0074	35	8151	0.0043	case	0.0396
475	CMIP	12	3081	0.0039	13	8173	0.0016	case	0.0399
476	AMIGO2	12	3081	0.0039	13	8173	0.0016	case	0.0399
477	LMLN	12	3081	0.0039	13	8173	0.0016	case	0.0399
478	CERS4	12	3081	0.0039	13	8173	0.0016	case	0.0399
479	IL18R1	12	3081	0.0039	13	8173	0.0016	case	0.0399
480	ZNF709	12	3081	0.0039	13	8173	0.0016	case	0.0399
481	CA2	5	3088	0.0016	3	8183	0.0003665	case	0.0401
482	SRP14	5	3088	0.0016	3	8183	0.0003665	case	0.0401
483	PLAC8L1	5	3088	0.0016	3	8183	0.0003665	case	0.0401
484	PPP1R17	5	3088	0.0016	3	8183	0.0003665	case	0.0401
485	NDEL1	5	3088	0.0016	3	8183	0.0003665	case	0.0401
486	C17orf59	5	3088	0.0016	3	8183	0.0003665	case	0.0401
487	MRGPRE	5	3088	0.0016	3	8183	0.0003665	case	0.0401
488	ATP1B1	5	3088	0.0016	3	8183	0.0003665	case	0.0401
489	OR14C36	5	3088	0.0016	3	8183	0.0003665	case	0.0401
490	PXT1	5	3088	0.0016	3	8183	0.0003665	case	0.0401
491	PIP	5	3088	0.0016	3	8183	0.0003665	case	0.0401
492	KRTAP27-1	5	3088	0.0016	3	8183	0.0003665	case	0.0401
493	MSL3	5	3088	0.0016	3	8183	0.0003665	case	0.0401
494	TUBA4A	5	3088	0.0016	3	8183	0.0003665	case	0.0401
495	SLC2A13	5	3088	0.0016	3	8183	0.0003665	case	0.0401
496	TSPAN16	5	3088	0.0016	3	8183	0.0003665	case	0.0401
497	IL18	5	3088	0.0016	3	8183	0.0003665	case	0.0401
498	IL1B	5	3088	0.0016	3	8183	0.0003665	case	0.0401
499	ALYREF	5	3088	0.0016	3	8183	0.0003665	case	0.0401
500	DESI2	5	3088	0.0016	3	8183	0.0003665	case	0.0401
501	LYG1	5	3088	0.0016	3	8183	0.0003665	case	0.0401
502	CPXCR1	5	3088	0.0016	3	8183	0.0003665	case	0.0401
503	ALDH1A3	5	3088	0.0016	3	8183	0.0003665	case	0.0401
504	MS4A6A	5	3088	0.0016	3	8183	0.0003665	case	0.0401
505	ZNF605	5	3088	0.0016	3	8183	0.0003665	case	0.0401
506	HIST3H2BB	5	3088	0.0016	3	8183	0.0003665	case	0.0401
507	CAV3	5	3088	0.0016	3	8183	0.0003665	case	0.0401
508	ZNF330	5	3088	0.0016	3	8183	0.0003665	case	0.0401
509	BAG2	5	3088	0.0016	3	8183	0.0003665	case	0.0401
510	GPX5	5	3088	0.0016	3	8183	0.0003665	case	0.0401
511	PHF3	11	3082	0.0036	57	8129	0.007	ctrl	0.0402
512	CCDC7	10	3083	0.0032	10	8176	0.0012	case	0.0404
513	LIPG	10	3083	0.0032	10	8176	0.0012	case	0.0404
514	WSCD1	10	3083	0.0032	10	8176	0.0012	case	0.0404
515	TESK2	10	3083	0.0032	10	8176	0.0012	case	0.0404
516	KRT28	10	3083	0.0032	10	8176	0.0012	case	0.0404
517	LIMCH1	16	3077	0.0052	21	8165	0.0026	case	0.0408
518	AGBL2	16	3077	0.0052	21	8165	0.0026	case	0.0408
519	TTC17	16	3077	0.0052	21	8165	0.0026	case	0.0408
520	TONSL	24	3069	0.0078	36	8150	0.0044	case	0.0409
521	SRRM2	65	3028	0.021	126	8060	0.0154	case	0.041
522	ADD3	14	3079	0.0045	17	8169	0.0021	case	0.0411
523	RARS	14	3079	0.0045	17	8169	0.0021	case	0.0411
524	ZNF267	14	3079	0.0045	17	8169	0.0021	case	0.0411
525	DGKQ	14	3079	0.0045	17	8169	0.0021	case	0.0411
526	PDCD11	27	3066	0.0087	42	8144	0.0051	case	0.0411
527	ATXN7	6	3087	0.0019	38	8148	0.0046	ctrl	0.0417
528	RSG1	0	3093	0	11	8175	0.0013	ctrl	0.0423
529	DNASE2	0	3093	0	11	8175	0.0013	ctrl	0.0423
530	FBLN5	0	3093	0	11	8175	0.0013	ctrl	0.0423
531	EREG	0	3093	0	11	8175	0.0013	ctrl	0.0423
532	PPP1R10	0	3093	0	11	8175	0.0013	ctrl	0.0423
533	NAP1L1	0	3093	0	11	8175	0.0013	ctrl	0.0423
534	FAM115A	0	3093	0	11	8175	0.0013	ctrl	0.0423
535	FZD2	0	3093	0	11	8175	0.0013	ctrl	0.0423
536	NABP1	0	3093	0	11	8175	0.0013	ctrl	0.0423
537	MRAP	0	3093	0	11	8175	0.0013	ctrl	0.0423
538	B3GAT1	0	3093	0	11	8175	0.0013	ctrl	0.0423
539	GAS2	0	3093	0	11	8175	0.0013	ctrl	0.0423
540	SGK3	0	3093	0	11	8175	0.0013	ctrl	0.0423
541	TEX30	0	3093	0	11	8175	0.0013	ctrl	0.0423
542	TPMT	0	3093	0	11	8175	0.0013	ctrl	0.0423
543	ZNF775	0	3093	0	11	8175	0.0013	ctrl	0.0423
544	PRTFDC1	0	3093	0	11	8175	0.0013	ctrl	0.0423
545	WNK4	6	3087	0.0019	39	8147	0.0048	ctrl	0.0427
546	TET2	27	3066	0.0087	43	8143	0.0053	case	0.0432
547	ARHGAP21	14	3079	0.0045	67	8119	0.0082	ctrl	0.0448
548	COL1A1	8	3085	0.0026	45	8141	0.0055	ctrl	0.0448
549	POGK	0	3093	0	12	8174	0.0015	ctrl	0.0451
550	COMMD10	0	3093	0	12	8174	0.0015	ctrl	0.0451
551	DNAJC3	0	3093	0	12	8174	0.0015	ctrl	0.0451
552	DNAJB7	0	3093	0	12	8174	0.0015	ctrl	0.0451
553	BBOX1	0	3093	0	12	8174	0.0015	ctrl	0.0451
554	GLRA1	0	3093	0	12	8174	0.0015	ctrl	0.0451
555	CYBA	0	3093	0	12	8174	0.0015	ctrl	0.0451
556	ANKRD66	0	3093	0	12	8174	0.0015	ctrl	0.0451
557	EMC10	0	3093	0	12	8174	0.0015	ctrl	0.0451
558	SKA1	0	3093	0	12	8174	0.0015	ctrl	0.0451
559	OR13C4	0	3093	0	12	8174	0.0015	ctrl	0.0451
560	GIPC1	0	3093	0	12	8174	0.0015	ctrl	0.0451
561	NAAA	0	3093	0	12	8174	0.0015	ctrl	0.0451
562	NAPA	0	3093	0	12	8174	0.0015	ctrl	0.0451
563	SLAMF9	0	3093	0	12	8174	0.0015	ctrl	0.0451
564	GP1BA	12	3081	0.0039	14	8172	0.0017	case	0.0451
565	ENGASE	12	3081	0.0039	14	8172	0.0017	case	0.0451
566	ZNF14	12	3081	0.0039	14	8172	0.0017	case	0.0451
567	SCN1A	10	3083	0.0032	52	8134	0.0064	ctrl	0.0459
568	TRIP11	10	3083	0.0032	52	8134	0.0064	ctrl	0.0459
569	ZNF749	16	3077	0.0052	22	8164	0.0027	case	0.0465
570	MUC4	35	3058	0.0113	136	8050	0.0166	ctrl	0.0465
571	NOC3L	5	3088	0.0016	34	8152	0.0042	ctrl	0.0465
572	ASAP2	5	3088	0.0016	34	8152	0.0042	ctrl	0.0465
573	ZSCAN20	5	3088	0.0016	34	8152	0.0042	ctrl	0.0465
574	CAT	14	3079	0.0045	18	8168	0.0022	case	0.0466
575	ST14	14	3079	0.0045	18	8168	0.0022	case	0.0466
576	KIAA1109	50	3043	0.0162	93	8093	0.0114	case	0.0473
577	DNAH5	36	3057	0.0116	138	8048	0.0169	ctrl	0.0486
578	AOC2	17	3076	0.0055	23	8163	0.0028	case	0.0486
579	SPATA7	17	3076	0.0055	23	8163	0.0028	case	0.0486
580	ITGA9	17	3076	0.0055	23	8163	0.0028	case	0.0486
581	FBXO33	10	3083	0.0032	11	8175	0.0013	case	0.0488
582	ELK4	10	3083	0.0032	11	8175	0.0013	case	0.0488
583	HPR	10	3083	0.0032	11	8175	0.0013	case	0.0488
584	BIN1	10	3083	0.0032	11	8175	0.0013	case	0.0488
585	LHX4	10	3083	0.0032	11	8175	0.0013	case	0.0488
586	CAMKK1	10	3083	0.0032	11	8175	0.0013	case	0.0488
587	CACNB3	10	3083	0.0032	11	8175	0.0013	case	0.0488
588	ZNF10	10	3083	0.0032	11	8175	0.0013	case	0.0488
589	MTA3	10	3083	0.0032	11	8175	0.0013	case	0.0488
590	STAT4	10	3083	0.0032	11	8175	0.0013	case	0.0488
591	UNKL	10	3083	0.0032	11	8175	0.0013	case	0.0488
592	KIAA1919	10	3083	0.0032	11	8175	0.0013	case	0.0488
593	PLEKHA1	10	3083	0.0032	11	8175	0.0013	case	0.0488
594	SYVN1	10	3083	0.0032	11	8175	0.0013	case	0.0488
595	KRT26	10	3083	0.0032	11	8175	0.0013	case	0.0488
596	ZNF404	10	3083	0.0032	11	8175	0.0013	case	0.0488
597	STAR	10	3083	0.0032	11	8175	0.0013	case	0.0488
598	TENM4	47	3046	0.0152	86	8100	0.0105	case	0.0499
599	JMJD1C	15	3078	0.0048	70	8116	0.0086	ctrl	0.05
600	AP2A2	19	3074	0.0061	28	8158	0.0034	case	0.05
601	MKI67	56	3037	0.0181	106	8080	0.0129	case	0.0505
602	FBXO34	4	3089	0.0013	29	8157	0.0035	ctrl	0.0508
603	MCM8	4	3089	0.0013	29	8157	0.0035	ctrl	0.0508
604	UBN1	4	3089	0.0013	29	8157	0.0035	ctrl	0.0508
605	NELL1	4	3089	0.0013	29	8157	0.0035	ctrl	0.0508
606	TARS	4	3089	0.0013	29	8157	0.0035	ctrl	0.0508
607	PBXIP1	4	3089	0.0013	29	8157	0.0035	ctrl	0.0508
608	OPRM1	4	3089	0.0013	29	8157	0.0035	ctrl	0.0508
609	TBC1D17	4	3089	0.0013	29	8157	0.0035	ctrl	0.0508
610	ZNF608	7	3086	0.0023	41	8145	0.005	ctrl	0.0508
611	EFCAB4B	22	3071	0.0071	34	8152	0.0042	case	0.0512
612	FBLN2	13	3080	0.0042	62	8124	0.0076	ctrl	0.0514
613	TEAD3	8	3085	0.0026	8	8178	0.0009773	case	0.0516
614	NDUFAF1	8	3085	0.0026	8	8178	0.0009773	case	0.0516
615	TAB1	8	3085	0.0026	8	8178	0.0009773	case	0.0516
616	KCNJ14	8	3085	0.0026	8	8178	0.0009773	case	0.0516
617	IL10RB	8	3085	0.0026	8	8178	0.0009773	case	0.0516
618	TOX	8	3085	0.0026	8	8178	0.0009773	case	0.0516
619	LDLRAP1	8	3085	0.0026	8	8178	0.0009773	case	0.0516
620	WASF1	8	3085	0.0026	8	8178	0.0009773	case	0.0516
621	OR2B3	8	3085	0.0026	8	8178	0.0009773	case	0.0516
622	ZADH2	8	3085	0.0026	8	8178	0.0009773	case	0.0516
623	UBE3A	8	3085	0.0026	8	8178	0.0009773	case	0.0516
624	C16orf62	8	3085	0.0026	8	8178	0.0009773	case	0.0516
625	KRT25	8	3085	0.0026	8	8178	0.0009773	case	0.0516
626	PLCZ1	8	3085	0.0026	8	8178	0.0009773	case	0.0516
627	ZNF259	8	3085	0.0026	8	8178	0.0009773	case	0.0516
628	SPTLC3	8	3085	0.0026	8	8178	0.0009773	case	0.0516
629	STK3	8	3085	0.0026	8	8178	0.0009773	case	0.0516
630	C3orf22	4	3089	0.0013	2	8184	0.0002443	case	0.0518
631	UBE2R2	4	3089	0.0013	2	8184	0.0002443	case	0.0518
632	HYPK	4	3089	0.0013	2	8184	0.0002443	case	0.0518
633	AKR1C1	4	3089	0.0013	2	8184	0.0002443	case	0.0518
634	C20orf173	4	3089	0.0013	2	8184	0.0002443	case	0.0518
635	OSTN	4	3089	0.0013	2	8184	0.0002443	case	0.0518
636	NRAS	4	3089	0.0013	2	8184	0.0002443	case	0.0518
637	FAM162A	4	3089	0.0013	2	8184	0.0002443	case	0.0518
638	MRPL32	4	3089	0.0013	2	8184	0.0002443	case	0.0518
639	PRSS27	4	3089	0.0013	2	8184	0.0002443	case	0.0518
640	C11orf74	4	3089	0.0013	2	8184	0.0002443	case	0.0518
641	TFF1	4	3089	0.0013	2	8184	0.0002443	case	0.0518
642	TTR	4	3089	0.0013	2	8184	0.0002443	case	0.0518
643	STAT1	4	3089	0.0013	2	8184	0.0002443	case	0.0518
644	IL34	4	3089	0.0013	2	8184	0.0002443	case	0.0518
645	C8orf47	4	3089	0.0013	2	8184	0.0002443	case	0.0518
646	SKA2	4	3089	0.0013	2	8184	0.0002443	case	0.0518
647	TOR1A	4	3089	0.0013	2	8184	0.0002443	case	0.0518
648	SWSAP1	4	3089	0.0013	2	8184	0.0002443	case	0.0518
649	TPTE	4	3089	0.0013	2	8184	0.0002443	case	0.0518
650	C2orf53	4	3089	0.0013	2	8184	0.0002443	case	0.0518
651	ZNF575	4	3089	0.0013	2	8184	0.0002443	case	0.0518
652	GLO1	4	3089	0.0013	2	8184	0.0002443	case	0.0518
653	NAT9	4	3089	0.0013	2	8184	0.0002443	case	0.0518
654	TNPO3	4	3089	0.0013	30	8156	0.0037	ctrl	0.0518
655	ITGB6	4	3089	0.0013	30	8156	0.0037	ctrl	0.0518
656	FBN2	39	3054	0.0126	70	8116	0.0086	case	0.0525
657	UNC13A	9	3084	0.0029	48	8138	0.0059	ctrl	0.0525
658	ZNF281	17	3076	0.0055	24	8162	0.0029	case	0.0529
659	LRRC7	17	3076	0.0055	24	8162	0.0029	case	0.0529
660	TRPM6	11	3082	0.0036	56	8130	0.0068	ctrl	0.0533
661	RREB1	11	3082	0.0036	56	8130	0.0068	ctrl	0.0533
662	KIF5A	12	3081	0.0039	15	8171	0.0018	case	0.0534
663	FARSB	12	3081	0.0039	15	8171	0.0018	case	0.0534
664	BRD3	12	3081	0.0039	15	8171	0.0018	case	0.0534
665	ZNF70	12	3081	0.0039	15	8171	0.0018	case	0.0534
666	TMEM175	12	3081	0.0039	15	8171	0.0018	case	0.0534
667	GIPR	12	3081	0.0039	15	8171	0.0018	case	0.0534
668	METTL4	12	3081	0.0039	15	8171	0.0018	case	0.0534
669	ZNF236	29	3064	0.0094	48	8138	0.0059	case	0.0536
670	KCNK6	1	3092	0.0003233	16	8170	0.002	ctrl	0.0546
671	HIST1H4B	1	3092	0.0003233	16	8170	0.002	ctrl	0.0546
672	FUCA1	1	3092	0.0003233	16	8170	0.002	ctrl	0.0546
673	LDHB	1	3092	0.0003233	16	8170	0.002	ctrl	0.0546
674	LMBRD2	1	3092	0.0003233	16	8170	0.002	ctrl	0.0546
675	RAD21	1	3092	0.0003233	16	8170	0.002	ctrl	0.0546
676	AGO3	1	3092	0.0003233	16	8170	0.002	ctrl	0.0546
677	BNIPL	1	3092	0.0003233	16	8170	0.002	ctrl	0.0546
678	CRTAM	1	3092	0.0003233	16	8170	0.002	ctrl	0.0546
679	CST8	1	3092	0.0003233	16	8170	0.002	ctrl	0.0546
680	GALNT3	1	3092	0.0003233	16	8170	0.002	ctrl	0.0546
681	CUL5	1	3092	0.0003233	16	8170	0.002	ctrl	0.0546
682	USP30	1	3092	0.0003233	16	8170	0.002	ctrl	0.0546
683	AQP1	1	3092	0.0003233	16	8170	0.002	ctrl	0.0546
684	METAP1D	1	3092	0.0003233	16	8170	0.002	ctrl	0.0546
685	ACADSB	1	3092	0.0003233	16	8170	0.002	ctrl	0.0546
686	CGRRF1	1	3092	0.0003233	16	8170	0.002	ctrl	0.0546
687	TAF7L	1	3092	0.0003233	16	8170	0.002	ctrl	0.0546
688	OR4C3	1	3092	0.0003233	16	8170	0.002	ctrl	0.0546
689	KIAA1045	1	3092	0.0003233	16	8170	0.002	ctrl	0.0546
690	SLC26A5	3	3090	0.0009699	25	8161	0.0031	ctrl	0.0547
691	DTNA	3	3090	0.0009699	25	8161	0.0031	ctrl	0.0547
692	CCDC65	3	3090	0.0009699	25	8161	0.0031	ctrl	0.0547
693	GRIK4	3	3090	0.0009699	25	8161	0.0031	ctrl	0.0547
694	ENPP5	7	3086	0.0023	6	8180	0.000733	case	0.0549
695	NIT1	7	3086	0.0023	6	8180	0.000733	case	0.0549
696	DNAJA4	7	3086	0.0023	6	8180	0.000733	case	0.0549
697	LAIR1	7	3086	0.0023	6	8180	0.000733	case	0.0549
698	SLC25A30	7	3086	0.0023	6	8180	0.000733	case	0.0549
699	HESX1	7	3086	0.0023	6	8180	0.000733	case	0.0549
700	SCO2	7	3086	0.0023	6	8180	0.000733	case	0.0549
701	APOBEC3F	7	3086	0.0023	6	8180	0.000733	case	0.0549
702	CRYBB2	7	3086	0.0023	6	8180	0.000733	case	0.0549
703	CCDC176	7	3086	0.0023	6	8180	0.000733	case	0.0549
704	FAM98C	7	3086	0.0023	6	8180	0.000733	case	0.0549
705	CAPG	7	3086	0.0023	6	8180	0.000733	case	0.0549
706	DEF6	7	3086	0.0023	6	8180	0.000733	case	0.0549
707	ZBTB7B	7	3086	0.0023	6	8180	0.000733	case	0.0549
708	B4GALT4	7	3086	0.0023	6	8180	0.000733	case	0.0549
709	PGAP2	15	3078	0.0048	20	8166	0.0024	case	0.0555
710	SYNJ1	23	3070	0.0074	36	8150	0.0044	case	0.0562
711	CC2D2A	29	3064	0.0094	49	8137	0.006	case	0.0565
712	PEX10	2	3091	0.0006466	20	8166	0.0024	ctrl	0.0566
713	CD6	2	3091	0.0006466	20	8166	0.0024	ctrl	0.0566
714	PRKAR2A	2	3091	0.0006466	20	8166	0.0024	ctrl	0.0566
715	SLC7A13	2	3091	0.0006466	20	8166	0.0024	ctrl	0.0566
716	FGB	2	3091	0.0006466	20	8166	0.0024	ctrl	0.0566
717	DEAF1	2	3091	0.0006466	20	8166	0.0024	ctrl	0.0566
718	DPYS	2	3091	0.0006466	20	8166	0.0024	ctrl	0.0566
719	SLFN12	2	3091	0.0006466	20	8166	0.0024	ctrl	0.0566
720	MUC21	2	3091	0.0006466	20	8166	0.0024	ctrl	0.0566
721	VSIG8	2	3091	0.0006466	20	8166	0.0024	ctrl	0.0566
722	PRDM11	2	3091	0.0006466	20	8166	0.0024	ctrl	0.0566
723	SMOC1	2	3091	0.0006466	20	8166	0.0024	ctrl	0.0566
724	TMEM194A	2	3091	0.0006466	20	8166	0.0024	ctrl	0.0566
725	ADAP2	2	3091	0.0006466	20	8166	0.0024	ctrl	0.0566
726	TRIM52	2	3091	0.0006466	20	8166	0.0024	ctrl	0.0566
727	OR6C74	2	3091	0.0006466	20	8166	0.0024	ctrl	0.0566
728	IRGM	2	3091	0.0006466	20	8166	0.0024	ctrl	0.0566
729	FAM71B	2	3091	0.0006466	20	8166	0.0024	ctrl	0.0566
730	NMUR1	2	3091	0.0006466	20	8166	0.0024	ctrl	0.0566
731	GPN1	2	3091	0.0006466	20	8166	0.0024	ctrl	0.0566
732	OAS2	6	3087	0.0019	36	8150	0.0044	ctrl	0.0574
733	ANKRD13D	13	3080	0.0042	16	8170	0.002	case	0.0575
734	LRRC32	13	3080	0.0042	16	8170	0.002	case	0.0575
735	HOOK1	13	3080	0.0042	16	8170	0.002	case	0.0575
736	CCDC121	13	3080	0.0042	16	8170	0.002	case	0.0575
737	ACSM2B	13	3080	0.0042	16	8170	0.002	case	0.0575
738	ACTL7B	2	3091	0.0006466	21	8165	0.0026	ctrl	0.0579
739	CACTIN	2	3091	0.0006466	21	8165	0.0026	ctrl	0.0579
740	LRRC31	2	3091	0.0006466	21	8165	0.0026	ctrl	0.0579
741	TAF3	2	3091	0.0006466	21	8165	0.0026	ctrl	0.0579
742	AMBN	2	3091	0.0006466	21	8165	0.0026	ctrl	0.0579
743	TMEM212	2	3091	0.0006466	21	8165	0.0026	ctrl	0.0579
744	ZNF420	2	3091	0.0006466	21	8165	0.0026	ctrl	0.0579
745	ATXN3	2	3091	0.0006466	21	8165	0.0026	ctrl	0.0579
746	RPA1	2	3091	0.0006466	21	8165	0.0026	ctrl	0.0579
747	ZHX3	6	3087	0.0019	37	8149	0.0045	ctrl	0.0579
748	AR	6	3087	0.0019	37	8149	0.0045	ctrl	0.0579
749	UBR5	30	3063	0.0097	50	8136	0.0061	case	0.0581
750	AHCTF1	26	3067	0.0084	43	8143	0.0053	case	0.0589
751	HTR3B	9	3084	0.0029	9	8177	0.0011	case	0.0589
752	C3orf30	9	3084	0.0029	9	8177	0.0011	case	0.0589
753	PCMTD2	9	3084	0.0029	9	8177	0.0011	case	0.0589
754	WDR86	9	3084	0.0029	9	8177	0.0011	case	0.0589
755	ZNF34	9	3084	0.0029	9	8177	0.0011	case	0.0589
756	OXGR1	9	3084	0.0029	9	8177	0.0011	case	0.0589
757	UBE2U	9	3084	0.0029	9	8177	0.0011	case	0.0589
758	TRIM60	9	3084	0.0029	9	8177	0.0011	case	0.0589
759	OR10R2	9	3084	0.0029	9	8177	0.0011	case	0.0589
760	PSME4	12	3081	0.0039	58	8128	0.0071	ctrl	0.0593
761	KIAA1244	12	3081	0.0039	58	8128	0.0071	ctrl	0.0593
762	MCM7	8	3085	0.0026	43	8143	0.0053	ctrl	0.0602
763	OGDHL	8	3085	0.0026	43	8143	0.0053	ctrl	0.0602
764	MAGI1	8	3085	0.0026	43	8143	0.0053	ctrl	0.0602
765	SPG7	8	3085	0.0026	44	8142	0.0054	ctrl	0.0604
766	DENND1C	23	3070	0.0074	37	8149	0.0045	case	0.0605
767	PCDHB11	18	3075	0.0058	26	8160	0.0032	case	0.0607
768	PCDHA3	18	3075	0.0058	26	8160	0.0032	case	0.0607
769	TLL2	15	3078	0.0048	21	8165	0.0026	case	0.0619
770	ZNF681	15	3078	0.0048	21	8165	0.0026	case	0.0619
771	KMT2D	46	3047	0.0149	167	8019	0.0204	ctrl	0.0624
772	TTC3	15	3078	0.0048	68	8118	0.0083	ctrl	0.0633
773	ADRA2B	11	3082	0.0036	13	8173	0.0016	case	0.0633
774	MITF	11	3082	0.0036	13	8173	0.0016	case	0.0633
775	PTGFRN	11	3082	0.0036	13	8173	0.0016	case	0.0633
776	POLDIP3	11	3082	0.0036	13	8173	0.0016	case	0.0633
777	OLFM4	11	3082	0.0036	13	8173	0.0016	case	0.0633
778	OR5P2	11	3082	0.0036	13	8173	0.0016	case	0.0633
779	FNBP1	11	3082	0.0036	13	8173	0.0016	case	0.0633
780	RNH1	11	3082	0.0036	13	8173	0.0016	case	0.0633
781	NLRP6	11	3082	0.0036	13	8173	0.0016	case	0.0633
782	TRAF2	11	3082	0.0036	13	8173	0.0016	case	0.0633
783	KCNH5	13	3080	0.0042	17	8169	0.0021	case	0.0636
784	RAD54L	13	3080	0.0042	17	8169	0.0021	case	0.0636
785	PARPBP	13	3080	0.0042	17	8169	0.0021	case	0.0636
786	TAF6	13	3080	0.0042	17	8169	0.0021	case	0.0636
787	RAP1GAP	13	3080	0.0042	17	8169	0.0021	case	0.0636
788	CNNM4	13	3080	0.0042	17	8169	0.0021	case	0.0636
789	HID1	13	3080	0.0042	17	8169	0.0021	case	0.0636
790	ANKRD11	18	3075	0.0058	78	8108	0.0095	ctrl	0.0653
791	FADS1	3	3090	0.0009699	1	8185	0.0001222	case	0.0655
792	PCYT1B	3	3090	0.0009699	1	8185	0.0001222	case	0.0655
793	C1orf194	3	3090	0.0009699	1	8185	0.0001222	case	0.0655
794	MRPS2	3	3090	0.0009699	1	8185	0.0001222	case	0.0655
795	HIST1H4A	3	3090	0.0009699	1	8185	0.0001222	case	0.0655
796	CDC42	3	3090	0.0009699	1	8185	0.0001222	case	0.0655
797	C10orf91	3	3090	0.0009699	1	8185	0.0001222	case	0.0655
798	FTH1	3	3090	0.0009699	1	8185	0.0001222	case	0.0655
799	SPANXN5	3	3090	0.0009699	1	8185	0.0001222	case	0.0655
800	IGFBP3	3	3090	0.0009699	1	8185	0.0001222	case	0.0655
801	FAM3A	3	3090	0.0009699	1	8185	0.0001222	case	0.0655
802	RPS11	3	3090	0.0009699	1	8185	0.0001222	case	0.0655
803	C7orf50	3	3090	0.0009699	1	8185	0.0001222	case	0.0655
804	MIP	3	3090	0.0009699	1	8185	0.0001222	case	0.0655
805	NR2F2	3	3090	0.0009699	1	8185	0.0001222	case	0.0655
806	C1orf56	3	3090	0.0009699	1	8185	0.0001222	case	0.0655
807	GABRA2	3	3090	0.0009699	1	8185	0.0001222	case	0.0655
808	SEPW1	3	3090	0.0009699	1	8185	0.0001222	case	0.0655
809	MRPL13	3	3090	0.0009699	1	8185	0.0001222	case	0.0655
810	KRTAP2-3	3	3090	0.0009699	1	8185	0.0001222	case	0.0655
811	PSMC5	3	3090	0.0009699	1	8185	0.0001222	case	0.0655
812	MORN5	3	3090	0.0009699	1	8185	0.0001222	case	0.0655
813	MAPRE1	3	3090	0.0009699	1	8185	0.0001222	case	0.0655
814	CYS1	3	3090	0.0009699	1	8185	0.0001222	case	0.0655
815	HOXA5	3	3090	0.0009699	1	8185	0.0001222	case	0.0655
816	BATF3	3	3090	0.0009699	1	8185	0.0001222	case	0.0655
817	COX17	3	3090	0.0009699	1	8185	0.0001222	case	0.0655
818	CYTL1	3	3090	0.0009699	1	8185	0.0001222	case	0.0655
819	SNTN	3	3090	0.0009699	1	8185	0.0001222	case	0.0655
820	CMTM8	3	3090	0.0009699	1	8185	0.0001222	case	0.0655
821	CBY3	3	3090	0.0009699	1	8185	0.0001222	case	0.0655
822	C9orf89	3	3090	0.0009699	1	8185	0.0001222	case	0.0655
823	FAM57A	3	3090	0.0009699	1	8185	0.0001222	case	0.0655
824	CDK1	3	3090	0.0009699	1	8185	0.0001222	case	0.0655
825	ITGAV	18	3075	0.0058	27	8159	0.0033	case	0.0656
826	FBXO40	5	3088	0.0016	33	8153	0.004	ctrl	0.0662
827	NEK4	5	3088	0.0016	33	8153	0.004	ctrl	0.0662
828	LGR6	5	3088	0.0016	33	8153	0.004	ctrl	0.0662
829	CEP76	5	3088	0.0016	33	8153	0.004	ctrl	0.0662
830	KLHDC4	5	3088	0.0016	33	8153	0.004	ctrl	0.0662
831	CD163L1	21	3072	0.0068	33	8153	0.004	case	0.0663
832	ZNF726	21	3072	0.0068	33	8153	0.004	case	0.0663
833	NLRP8	21	3072	0.0068	33	8153	0.004	case	0.0663
834	TNRC6B	28	3065	0.0091	47	8139	0.0057	case	0.068
835	PCDHGC3	7	3086	0.0023	39	8147	0.0048	ctrl	0.0686
836	HAUS6	7	3086	0.0023	39	8147	0.0048	ctrl	0.0686
837	SMARCD3	9	3084	0.0029	10	8176	0.0012	case	0.0686
838	EPN2	9	3084	0.0029	10	8176	0.0012	case	0.0686
839	TRIM6	9	3084	0.0029	10	8176	0.0012	case	0.0686
840	PODXL2	9	3084	0.0029	10	8176	0.0012	case	0.0686
841	RCOR2	9	3084	0.0029	10	8176	0.0012	case	0.0686
842	TIPARP	9	3084	0.0029	10	8176	0.0012	case	0.0686
843	SCG3	9	3084	0.0029	10	8176	0.0012	case	0.0686
844	STAP1	9	3084	0.0029	10	8176	0.0012	case	0.0686
845	FCN1	9	3084	0.0029	10	8176	0.0012	case	0.0686
846	OR6Y1	9	3084	0.0029	10	8176	0.0012	case	0.0686
847	TRAM1L1	9	3084	0.0029	10	8176	0.0012	case	0.0686
848	ANKRD12	11	3082	0.0036	54	8132	0.0066	ctrl	0.0688
849	FGD5	16	3077	0.0052	70	8116	0.0086	ctrl	0.069
850	WDR19	9	3084	0.0029	46	8140	0.0056	ctrl	0.0694
851	DDHD1	9	3084	0.0029	46	8140	0.0056	ctrl	0.0694
852	DAGLB	7	3086	0.0023	40	8146	0.0049	ctrl	0.0697
853	ABCA4	39	3054	0.0126	72	8114	0.0088	case	0.0697
854	SCIN	9	3084	0.0029	47	8139	0.0057	ctrl	0.0702
855	KIAA2013	5	3088	0.0016	4	8182	0.0004886	case	0.0702
856	DCD	5	3088	0.0016	4	8182	0.0004886	case	0.0702
857	HSPB8	5	3088	0.0016	4	8182	0.0004886	case	0.0702
858	NANOS3	5	3088	0.0016	4	8182	0.0004886	case	0.0702
859	LRRC25	5	3088	0.0016	4	8182	0.0004886	case	0.0702
860	LRRC20	5	3088	0.0016	4	8182	0.0004886	case	0.0702
861	C17orf97	5	3088	0.0016	4	8182	0.0004886	case	0.0702
862	CCDC6	5	3088	0.0016	4	8182	0.0004886	case	0.0702
863	CSTL1	5	3088	0.0016	4	8182	0.0004886	case	0.0702
864	TIRAP	5	3088	0.0016	4	8182	0.0004886	case	0.0702
865	LIM2	5	3088	0.0016	4	8182	0.0004886	case	0.0702
866	STARD6	5	3088	0.0016	4	8182	0.0004886	case	0.0702
867	ACRV1	5	3088	0.0016	4	8182	0.0004886	case	0.0702
868	SLC25A36	5	3088	0.0016	4	8182	0.0004886	case	0.0702
869	SFRP5	5	3088	0.0016	4	8182	0.0004886	case	0.0702
870	MLX	5	3088	0.0016	4	8182	0.0004886	case	0.0702
871	SULT4A1	5	3088	0.0016	4	8182	0.0004886	case	0.0702
872	CENPI	5	3088	0.0016	4	8182	0.0004886	case	0.0702
873	ASCL4	5	3088	0.0016	4	8182	0.0004886	case	0.0702
874	CST1	5	3088	0.0016	4	8182	0.0004886	case	0.0702
875	DUSP26	5	3088	0.0016	4	8182	0.0004886	case	0.0702
876	HDGF	5	3088	0.0016	4	8182	0.0004886	case	0.0702
877	OR5H1	5	3088	0.0016	4	8182	0.0004886	case	0.0702
878	PSMD13	5	3088	0.0016	4	8182	0.0004886	case	0.0702
879	CALB2	5	3088	0.0016	4	8182	0.0004886	case	0.0702
880	EBF1	5	3088	0.0016	4	8182	0.0004886	case	0.0702
881	RUNX2	5	3088	0.0016	4	8182	0.0004886	case	0.0702
882	RIMS3	5	3088	0.0016	4	8182	0.0004886	case	0.0702
883	OR8U1	5	3088	0.0016	4	8182	0.0004886	case	0.0702
884	OR10A2	5	3088	0.0016	4	8182	0.0004886	case	0.0702
885	TTC9C	5	3088	0.0016	4	8182	0.0004886	case	0.0702
886	SYNDIG1	5	3088	0.0016	4	8182	0.0004886	case	0.0702
887	CEACAM21	5	3088	0.0016	4	8182	0.0004886	case	0.0702
888	RAET1L	5	3088	0.0016	4	8182	0.0004886	case	0.0702
889	GRM2	16	3077	0.0052	23	8163	0.0028	case	0.0707
890	UACA	16	3077	0.0052	23	8163	0.0028	case	0.0707
891	MMP17	16	3077	0.0052	23	8163	0.0028	case	0.0707
892	ZFAND4	16	3077	0.0052	23	8163	0.0028	case	0.0707
893	ZNF197	16	3077	0.0052	23	8163	0.0028	case	0.0707
894	ATP6AP2	0	3093	0	10	8176	0.0012	ctrl	0.0714
895	APOPT1	0	3093	0	10	8176	0.0012	ctrl	0.0714
896	CDC34	0	3093	0	10	8176	0.0012	ctrl	0.0714
897	CALML6	0	3093	0	10	8176	0.0012	ctrl	0.0714
898	KAT8	0	3093	0	10	8176	0.0012	ctrl	0.0714
899	ACOT2	0	3093	0	10	8176	0.0012	ctrl	0.0714
900	2019-09-11	0	3093	0	10	8176	0.0012	ctrl	0.0714
901	ZDHHC19	0	3093	0	10	8176	0.0012	ctrl	0.0714
902	PILRA	0	3093	0	10	8176	0.0012	ctrl	0.0714
903	MRGPRX1	0	3093	0	10	8176	0.0012	ctrl	0.0714
904	MRPL55	0	3093	0	10	8176	0.0012	ctrl	0.0714
905	TMEM19	0	3093	0	10	8176	0.0012	ctrl	0.0714
906	GALR2	0	3093	0	10	8176	0.0012	ctrl	0.0714
907	CRYAA	0	3093	0	10	8176	0.0012	ctrl	0.0714
908	RALB	0	3093	0	10	8176	0.0012	ctrl	0.0714
909	RBKS	0	3093	0	10	8176	0.0012	ctrl	0.0714
910	BCL2L11	0	3093	0	10	8176	0.0012	ctrl	0.0714
911	RNASE11	0	3093	0	10	8176	0.0012	ctrl	0.0714
912	ZFP42	0	3093	0	10	8176	0.0012	ctrl	0.0714
913	EIF4E2	0	3093	0	10	8176	0.0012	ctrl	0.0714
914	ATP6V1A	0	3093	0	10	8176	0.0012	ctrl	0.0714
915	TMEM125	0	3093	0	10	8176	0.0012	ctrl	0.0714
916	WTAP	0	3093	0	10	8176	0.0012	ctrl	0.0714
917	FAM218A	0	3093	0	10	8176	0.0012	ctrl	0.0714
918	OR4L1	0	3093	0	10	8176	0.0012	ctrl	0.0714
919	ZP3	0	3093	0	10	8176	0.0012	ctrl	0.0714
920	AJUBA	0	3093	0	10	8176	0.0012	ctrl	0.0714
921	TRIM13	0	3093	0	10	8176	0.0012	ctrl	0.0714
922	HMX2	0	3093	0	10	8176	0.0012	ctrl	0.0714
923	SNF8	0	3093	0	10	8176	0.0012	ctrl	0.0714
924	CCDC177	0	3093	0	10	8176	0.0012	ctrl	0.0714
925	PKDCC	0	3093	0	10	8176	0.0012	ctrl	0.0714
926	ZBTB44	0	3093	0	10	8176	0.0012	ctrl	0.0714
927	THAP10	0	3093	0	10	8176	0.0012	ctrl	0.0714
928	EML6	69	3024	0.0223	140	8046	0.0171	case	0.0718
929	HSD17B13	7	3086	0.0023	7	8179	0.0008551	case	0.0719
930	AVPR1A	7	3086	0.0023	7	8179	0.0008551	case	0.0719
931	SLC7A1	7	3086	0.0023	7	8179	0.0008551	case	0.0719
932	HSPA14	7	3086	0.0023	7	8179	0.0008551	case	0.0719
933	IFNA21	7	3086	0.0023	7	8179	0.0008551	case	0.0719
934	C6orf118	7	3086	0.0023	7	8179	0.0008551	case	0.0719
935	CHSY3	7	3086	0.0023	7	8179	0.0008551	case	0.0719
936	SPOPL	7	3086	0.0023	7	8179	0.0008551	case	0.0719
937	CYP4A22	7	3086	0.0023	7	8179	0.0008551	case	0.0719
938	HIST1H2AL	7	3086	0.0023	7	8179	0.0008551	case	0.0719
939	ZCCHC9	7	3086	0.0023	7	8179	0.0008551	case	0.0719
940	OR1J1	7	3086	0.0023	7	8179	0.0008551	case	0.0719
941	OR1Q1	7	3086	0.0023	7	8179	0.0008551	case	0.0719
942	SUGT1	7	3086	0.0023	7	8179	0.0008551	case	0.0719
943	PPM1M	7	3086	0.0023	7	8179	0.0008551	case	0.0719
944	CIDEB	7	3086	0.0023	7	8179	0.0008551	case	0.0719
945	CAMKV	7	3086	0.0023	7	8179	0.0008551	case	0.0719
946	OR9A2	7	3086	0.0023	7	8179	0.0008551	case	0.0719
947	TM6SF2	7	3086	0.0023	7	8179	0.0008551	case	0.0719
948	KIAA1715	7	3086	0.0023	7	8179	0.0008551	case	0.0719
949	METRNL	7	3086	0.0023	7	8179	0.0008551	case	0.0719
950	DAPK3	7	3086	0.0023	7	8179	0.0008551	case	0.0719
951	FAM170B	4	3089	0.0013	27	8159	0.0033	ctrl	0.072
952	SLC9A3	4	3089	0.0013	27	8159	0.0033	ctrl	0.072
953	L3MBTL4	4	3089	0.0013	27	8159	0.0033	ctrl	0.072
954	PASD1	4	3089	0.0013	27	8159	0.0033	ctrl	0.072
955	MLIP	4	3089	0.0013	27	8159	0.0033	ctrl	0.072
956	TRMT6	4	3089	0.0013	27	8159	0.0033	ctrl	0.072
957	CHAMP1	4	3089	0.0013	27	8159	0.0033	ctrl	0.072
958	ADHFE1	4	3089	0.0013	27	8159	0.0033	ctrl	0.072
959	SLC22A3	4	3089	0.0013	28	8158	0.0034	ctrl	0.0723
960	GADL1	4	3089	0.0013	28	8158	0.0034	ctrl	0.0723
961	STAT6	4	3089	0.0013	28	8158	0.0034	ctrl	0.0723
962	WRAP53	4	3089	0.0013	28	8158	0.0034	ctrl	0.0723
963	SUSD5	11	3082	0.0036	14	8172	0.0017	case	0.0729
964	FUS	11	3082	0.0036	14	8172	0.0017	case	0.0729
965	AMIGO3	11	3082	0.0036	14	8172	0.0017	case	0.0729
966	SPATA6L	11	3082	0.0036	14	8172	0.0017	case	0.0729
967	UNC5A	11	3082	0.0036	14	8172	0.0017	case	0.0729
968	BICD2	11	3082	0.0036	14	8172	0.0017	case	0.0729
969	COPB2	11	3082	0.0036	14	8172	0.0017	case	0.0729
970	SGCZ	11	3082	0.0036	14	8172	0.0017	case	0.0729
971	PRMT5	11	3082	0.0036	14	8172	0.0017	case	0.0729
972	GRID1	11	3082	0.0036	14	8172	0.0017	case	0.0729
973	RALBP1	11	3082	0.0036	14	8172	0.0017	case	0.0729
974	CCR2	11	3082	0.0036	14	8172	0.0017	case	0.0729
975	ITGAM	19	3074	0.0061	29	8157	0.0035	case	0.0731
976	PHRF1	17	3076	0.0055	73	8113	0.0089	ctrl	0.075
977	KIAA0100	17	3076	0.0055	73	8113	0.0089	ctrl	0.075
978	ZC4H2	2	3091	0.0006466	0	8186	0	case	0.0752
979	PLK5	2	3091	0.0006466	0	8186	0	case	0.0752
980	C3orf14	2	3091	0.0006466	0	8186	0	case	0.0752
981	TCEAL8	2	3091	0.0006466	0	8186	0	case	0.0752
982	CGB1	2	3091	0.0006466	0	8186	0	case	0.0752
983	NHLH1	2	3091	0.0006466	0	8186	0	case	0.0752
984	HSPB3	2	3091	0.0006466	0	8186	0	case	0.0752
985	RAB6C	2	3091	0.0006466	0	8186	0	case	0.0752
986	LEP	2	3091	0.0006466	0	8186	0	case	0.0752
987	C7orf73	2	3091	0.0006466	0	8186	0	case	0.0752
988	SLC25A29	2	3091	0.0006466	0	8186	0	case	0.0752
989	KLRC1	2	3091	0.0006466	0	8186	0	case	0.0752
990	SNAP25	2	3091	0.0006466	0	8186	0	case	0.0752
991	NPIPA5	2	3091	0.0006466	0	8186	0	case	0.0752
992	C11orf73	2	3091	0.0006466	0	8186	0	case	0.0752
993	KLF6	2	3091	0.0006466	0	8186	0	case	0.0752
994	AGAP7	2	3091	0.0006466	0	8186	0	case	0.0752
995	PPP1R14C	2	3091	0.0006466	0	8186	0	case	0.0752
996	PCBP2	2	3091	0.0006466	0	8186	0	case	0.0752
997	LYZL6	2	3091	0.0006466	0	8186	0	case	0.0752
998	C8orf22	2	3091	0.0006466	0	8186	0	case	0.0752
999	RPL36AL	2	3091	0.0006466	0	8186	0	case	0.0752
1000	SAP30	2	3091	0.0006466	0	8186	0	case	0.0752
1001	GJC2	2	3091	0.0006466	0	8186	0	case	0.0752
1002	C2orf82	2	3091	0.0006466	0	8186	0	case	0.0752
1003	EID2	2	3091	0.0006466	0	8186	0	case	0.0752
1004	CD8A	2	3091	0.0006466	0	8186	0	case	0.0752
1005	MYH8	36	3057	0.0116	66	8120	0.0081	case	0.0753
1006	ENTPD7	14	3079	0.0045	19	8167	0.0023	case	0.0759
1007	CASKIN2	14	3079	0.0045	19	8167	0.0023	case	0.0759
1008	PI4KA	12	3081	0.0039	57	8129	0.007	ctrl	0.0772
1009	NUP210L	22	3071	0.0071	36	8150	0.0044	case	0.0773
1010	SH2D3A	16	3077	0.0052	24	8162	0.0029	case	0.0779
1011	THAP9	16	3077	0.0052	24	8162	0.0029	case	0.0779
1012	DOCK8	33	3060	0.0107	59	8127	0.0072	case	0.0779
1013	TSHZ1	6	3087	0.0019	35	8151	0.0043	ctrl	0.0784
1014	TRPA1	6	3087	0.0019	35	8151	0.0043	ctrl	0.0784
1015	TERT	6	3087	0.0019	35	8151	0.0043	ctrl	0.0784
1016	DHX38	6	3087	0.0019	35	8151	0.0043	ctrl	0.0784
1017	MCMDC2	6	3087	0.0019	35	8151	0.0043	ctrl	0.0784
1018	UBE4A	6	3087	0.0019	35	8151	0.0043	ctrl	0.0784
1019	SMC4	6	3087	0.0019	35	8151	0.0043	ctrl	0.0784
1020	FBXO30	3	3090	0.0009699	23	8163	0.0028	ctrl	0.0787
1021	SLC26A10	3	3090	0.0009699	23	8163	0.0028	ctrl	0.0787
1022	SLC52A2	3	3090	0.0009699	23	8163	0.0028	ctrl	0.0787
1023	CPNE8	3	3090	0.0009699	23	8163	0.0028	ctrl	0.0787
1024	IL7R	3	3090	0.0009699	23	8163	0.0028	ctrl	0.0787
1025	GIT1	3	3090	0.0009699	23	8163	0.0028	ctrl	0.0787
1026	ZNF710	3	3090	0.0009699	23	8163	0.0028	ctrl	0.0787
1027	ZNF547	3	3090	0.0009699	23	8163	0.0028	ctrl	0.0787
1028	HSF4	3	3090	0.0009699	23	8163	0.0028	ctrl	0.0787
1029	INO80	19	3074	0.0061	30	8156	0.0037	case	0.0787
1030	FNDC7	19	3074	0.0061	30	8156	0.0037	case	0.0787
1031	ALPK1	10	3083	0.0032	49	8137	0.006	ctrl	0.0789
1032	TMC6	10	3083	0.0032	49	8137	0.006	ctrl	0.0789
1033	ECD	3	3090	0.0009699	24	8162	0.0029	ctrl	0.0808
1034	LRRC71	3	3090	0.0009699	24	8162	0.0029	ctrl	0.0808
1035	DPP4	3	3090	0.0009699	24	8162	0.0029	ctrl	0.0808
1036	XPO7	3	3090	0.0009699	24	8162	0.0029	ctrl	0.0808
1037	ATL2	3	3090	0.0009699	24	8162	0.0029	ctrl	0.0808
1038	PIGK	3	3090	0.0009699	24	8162	0.0029	ctrl	0.0808
1039	INPP5E	3	3090	0.0009699	24	8162	0.0029	ctrl	0.0808
1040	TUBGCP5	17	3076	0.0055	25	8161	0.0031	case	0.081
1041	KANK1	18	3075	0.0058	75	8111	0.0092	ctrl	0.0811
1042	AKAP12	18	3075	0.0058	75	8111	0.0092	ctrl	0.0811
1043	TRMT61A	6	3087	0.0019	5	8181	0.0006108	case	0.0818
1044	EIF4E	6	3087	0.0019	5	8181	0.0006108	case	0.0818
1045	OR2AT4	6	3087	0.0019	5	8181	0.0006108	case	0.0818
1046	ZPBP	6	3087	0.0019	5	8181	0.0006108	case	0.0818
1047	IFNA14	6	3087	0.0019	5	8181	0.0006108	case	0.0818
1048	UCK1	6	3087	0.0019	5	8181	0.0006108	case	0.0818
1049	SLC25A19	6	3087	0.0019	5	8181	0.0006108	case	0.0818
1050	UTP23	6	3087	0.0019	5	8181	0.0006108	case	0.0818
1051	HMGN3	6	3087	0.0019	5	8181	0.0006108	case	0.0818
1052	RBP1	6	3087	0.0019	5	8181	0.0006108	case	0.0818
1053	VCP	6	3087	0.0019	5	8181	0.0006108	case	0.0818
1054	NDRG4	6	3087	0.0019	5	8181	0.0006108	case	0.0818
1055	C9orf173	6	3087	0.0019	5	8181	0.0006108	case	0.0818
1056	IL26	6	3087	0.0019	5	8181	0.0006108	case	0.0818
1057	EIF2B2	6	3087	0.0019	5	8181	0.0006108	case	0.0818
1058	VGLL3	6	3087	0.0019	5	8181	0.0006108	case	0.0818
1059	OR2T33	6	3087	0.0019	5	8181	0.0006108	case	0.0818
1060	MYL7	6	3087	0.0019	5	8181	0.0006108	case	0.0818
1061	EAF1	6	3087	0.0019	5	8181	0.0006108	case	0.0818
1062	FEN1	6	3087	0.0019	5	8181	0.0006108	case	0.0818
1063	ULBP3	6	3087	0.0019	5	8181	0.0006108	case	0.0818
1064	TRIM43	6	3087	0.0019	5	8181	0.0006108	case	0.0818
1065	HCRTR1	6	3087	0.0019	5	8181	0.0006108	case	0.0818
1066	SLC29A2	6	3087	0.0019	5	8181	0.0006108	case	0.0818
1067	CD47	6	3087	0.0019	5	8181	0.0006108	case	0.0818
1068	MDGA2	14	3079	0.0045	20	8166	0.0024	case	0.0829
1069	THNSL1	14	3079	0.0045	20	8166	0.0024	case	0.0829
1070	PKD2	14	3079	0.0045	20	8166	0.0024	case	0.0829
1071	F2	9	3084	0.0029	11	8175	0.0013	case	0.0836
1072	KLK15	9	3084	0.0029	11	8175	0.0013	case	0.0836
1073	HSPA9	9	3084	0.0029	11	8175	0.0013	case	0.0836
1074	AGPAT9	9	3084	0.0029	11	8175	0.0013	case	0.0836
1075	CDCP2	9	3084	0.0029	11	8175	0.0013	case	0.0836
1076	DOK1	9	3084	0.0029	11	8175	0.0013	case	0.0836
1077	SUPT7L	9	3084	0.0029	11	8175	0.0013	case	0.0836
1078	PYCRL	9	3084	0.0029	11	8175	0.0013	case	0.0836
1079	ALS2CR12	9	3084	0.0029	11	8175	0.0013	case	0.0836
1080	PKMYT1	9	3084	0.0029	11	8175	0.0013	case	0.0836
1081	PRSS1	9	3084	0.0029	11	8175	0.0013	case	0.0836
1082	TPM3	9	3084	0.0029	11	8175	0.0013	case	0.0836
1083	CHDC2	9	3084	0.0029	11	8175	0.0013	case	0.0836
1084	PEX7	9	3084	0.0029	11	8175	0.0013	case	0.0836
1085	ENOX2	9	3084	0.0029	11	8175	0.0013	case	0.0836
1086	GSTO2	1	3092	0.0003233	14	8172	0.0017	ctrl	0.0842
1087	MOCS2	1	3092	0.0003233	14	8172	0.0017	ctrl	0.0842
1088	CHM	1	3092	0.0003233	14	8172	0.0017	ctrl	0.0842
1089	QPRT	1	3092	0.0003233	14	8172	0.0017	ctrl	0.0842
1090	GLIPR1	1	3092	0.0003233	14	8172	0.0017	ctrl	0.0842
1091	TTC39A	1	3092	0.0003233	14	8172	0.0017	ctrl	0.0842
1092	GDA	1	3092	0.0003233	14	8172	0.0017	ctrl	0.0842
1093	DYNC1LI2	1	3092	0.0003233	14	8172	0.0017	ctrl	0.0842
1094	NMBR	1	3092	0.0003233	14	8172	0.0017	ctrl	0.0842
1095	NDUFAF2	1	3092	0.0003233	14	8172	0.0017	ctrl	0.0842
1096	LHX2	1	3092	0.0003233	14	8172	0.0017	ctrl	0.0842
1097	CSTF3	1	3092	0.0003233	14	8172	0.0017	ctrl	0.0842
1098	UBXN1	1	3092	0.0003233	14	8172	0.0017	ctrl	0.0842
1099	ZDHHC23	1	3092	0.0003233	14	8172	0.0017	ctrl	0.0842
1100	GABARAPL2	1	3092	0.0003233	14	8172	0.0017	ctrl	0.0842
1101	PRDX3	1	3092	0.0003233	14	8172	0.0017	ctrl	0.0842
1102	PRDX5	1	3092	0.0003233	14	8172	0.0017	ctrl	0.0842
1103	TBX6	1	3092	0.0003233	14	8172	0.0017	ctrl	0.0842
1104	HAX1	1	3092	0.0003233	14	8172	0.0017	ctrl	0.0842
1105	ACVR1	1	3092	0.0003233	14	8172	0.0017	ctrl	0.0842
1106	SPATA18	1	3092	0.0003233	14	8172	0.0017	ctrl	0.0842
1107	PRPF38A	1	3092	0.0003233	14	8172	0.0017	ctrl	0.0842
1108	RCN1	1	3092	0.0003233	14	8172	0.0017	ctrl	0.0842
1109	MAPK8	1	3092	0.0003233	14	8172	0.0017	ctrl	0.0842
1110	ECI1	1	3092	0.0003233	14	8172	0.0017	ctrl	0.0842
1111	GJC3	1	3092	0.0003233	14	8172	0.0017	ctrl	0.0842
1112	PDHX	1	3092	0.0003233	14	8172	0.0017	ctrl	0.0842
1113	CCDC28A	1	3092	0.0003233	14	8172	0.0017	ctrl	0.0842
1114	NUDT16	1	3092	0.0003233	14	8172	0.0017	ctrl	0.0842
1115	GNB3	1	3092	0.0003233	14	8172	0.0017	ctrl	0.0842
1116	UGT1A8	1	3092	0.0003233	14	8172	0.0017	ctrl	0.0842
1117	MAGEB1	1	3092	0.0003233	14	8172	0.0017	ctrl	0.0842
1118	MAGEE2	1	3092	0.0003233	14	8172	0.0017	ctrl	0.0842
1119	NCR2	1	3092	0.0003233	14	8172	0.0017	ctrl	0.0842
1120	APP	1	3092	0.0003233	14	8172	0.0017	ctrl	0.0842
1121	ATP6V1C2	2	3091	0.0006466	19	8167	0.0023	ctrl	0.0845
1122	KIF11	2	3091	0.0006466	19	8167	0.0023	ctrl	0.0845
1123	CYP4F12	2	3091	0.0006466	19	8167	0.0023	ctrl	0.0845
1124	TC2N	2	3091	0.0006466	19	8167	0.0023	ctrl	0.0845
1125	CAMK2B	2	3091	0.0006466	19	8167	0.0023	ctrl	0.0845
1126	SHB	2	3091	0.0006466	19	8167	0.0023	ctrl	0.0845
1127	PFKFB3	2	3091	0.0006466	19	8167	0.0023	ctrl	0.0845
1128	RGAG4	2	3091	0.0006466	19	8167	0.0023	ctrl	0.0845
1129	HIF3A	2	3091	0.0006466	19	8167	0.0023	ctrl	0.0845
1130	METTL18	2	3091	0.0006466	19	8167	0.0023	ctrl	0.0845
1131	SMPDL3B	2	3091	0.0006466	19	8167	0.0023	ctrl	0.0845
1132	KYNU	2	3091	0.0006466	19	8167	0.0023	ctrl	0.0845
1133	TUBGCP6	38	3055	0.0123	71	8115	0.0087	case	0.0846
1134	LEMD3	20	3073	0.0065	32	8154	0.0039	case	0.0858
1135	UNC5B	17	3076	0.0055	26	8160	0.0032	case	0.0862
1136	EPHA1	17	3076	0.0055	26	8160	0.0032	case	0.0862
1137	PDGFRB	17	3076	0.0055	26	8160	0.0032	case	0.0862
1138	DMXL2	19	3074	0.0061	78	8108	0.0095	ctrl	0.0869
1139	GOLIM4	12	3081	0.0039	16	8170	0.002	case	0.0873
1140	PIBF1	12	3081	0.0039	16	8170	0.002	case	0.0873
1141	PRCP	12	3081	0.0039	16	8170	0.002	case	0.0873
1142	COL23A1	12	3081	0.0039	16	8170	0.002	case	0.0873
1143	KLC1	12	3081	0.0039	16	8170	0.002	case	0.0873
1144	RAP1GAP2	12	3081	0.0039	16	8170	0.002	case	0.0873
1145	CDC6	12	3081	0.0039	16	8170	0.002	case	0.0873
1146	CYP4Z1	12	3081	0.0039	16	8170	0.002	case	0.0873
1147	STRC	1	3092	0.0003233	15	8171	0.0018	ctrl	0.0874
1148	YES1	1	3092	0.0003233	15	8171	0.0018	ctrl	0.0874
1149	HTRA4	1	3092	0.0003233	15	8171	0.0018	ctrl	0.0874
1150	KCMF1	1	3092	0.0003233	15	8171	0.0018	ctrl	0.0874
1151	NFIL3	1	3092	0.0003233	15	8171	0.0018	ctrl	0.0874
1152	PPP1R3C	1	3092	0.0003233	15	8171	0.0018	ctrl	0.0874
1153	PRG3	1	3092	0.0003233	15	8171	0.0018	ctrl	0.0874
1154	NAP1L3	1	3092	0.0003233	15	8171	0.0018	ctrl	0.0874
1155	CCDC54	1	3092	0.0003233	15	8171	0.0018	ctrl	0.0874
1156	PIPOX	1	3092	0.0003233	15	8171	0.0018	ctrl	0.0874
1157	LARP6	1	3092	0.0003233	15	8171	0.0018	ctrl	0.0874
1158	MLLT1	1	3092	0.0003233	15	8171	0.0018	ctrl	0.0874
1159	LIN7B	1	3092	0.0003233	15	8171	0.0018	ctrl	0.0874
1160	VEGFC	1	3092	0.0003233	15	8171	0.0018	ctrl	0.0874
1161	GLUD2	1	3092	0.0003233	15	8171	0.0018	ctrl	0.0874
1162	OR6N2	1	3092	0.0003233	15	8171	0.0018	ctrl	0.0874
1163	POM121C	1	3092	0.0003233	15	8171	0.0018	ctrl	0.0874
1164	PGLS	1	3092	0.0003233	15	8171	0.0018	ctrl	0.0874
1165	APOBEC4	1	3092	0.0003233	15	8171	0.0018	ctrl	0.0874
1166	UGT1A5	1	3092	0.0003233	15	8171	0.0018	ctrl	0.0874
1167	ADH1B	1	3092	0.0003233	15	8171	0.0018	ctrl	0.0874
1168	CCDC88B	23	3070	0.0074	39	8147	0.0048	case	0.0885
1169	FBF1	23	3070	0.0074	39	8147	0.0048	case	0.0885
1170	PNPLA7	23	3070	0.0074	39	8147	0.0048	case	0.0885
1171	IARS	11	3082	0.0036	52	8134	0.0064	ctrl	0.0885
1172	EXOC7	5	3088	0.0016	30	8156	0.0037	ctrl	0.089
1173	PNPT1	5	3088	0.0016	30	8156	0.0037	ctrl	0.089
1174	CCDC61	5	3088	0.0016	30	8156	0.0037	ctrl	0.089
1175	IL1R2	10	3083	0.0032	12	8174	0.0015	case	0.0898
1176	DBT	10	3083	0.0032	12	8174	0.0015	case	0.0898
1177	PDLIM3	10	3083	0.0032	12	8174	0.0015	case	0.0898
1178	UFL1	10	3083	0.0032	12	8174	0.0015	case	0.0898
1179	HNRNPUL1	10	3083	0.0032	12	8174	0.0015	case	0.0898
1180	CES4A	10	3083	0.0032	12	8174	0.0015	case	0.0898
1181	TNIP1	10	3083	0.0032	12	8174	0.0015	case	0.0898
1182	RFC4	10	3083	0.0032	12	8174	0.0015	case	0.0898
1183	SLC27A3	5	3088	0.0016	31	8155	0.0038	ctrl	0.0901
1184	SLC8A3	5	3088	0.0016	31	8155	0.0038	ctrl	0.0901
1185	MYLK3	5	3088	0.0016	31	8155	0.0038	ctrl	0.0901
1186	COL4A6	5	3088	0.0016	31	8155	0.0038	ctrl	0.0901
1187	SECISBP2L	5	3088	0.0016	31	8155	0.0038	ctrl	0.0901
1188	ZNF180	5	3088	0.0016	31	8155	0.0038	ctrl	0.0901
1189	SLIT2	24	3069	0.0078	40	8146	0.0049	case	0.0904
1190	FAM208A	9	3084	0.0029	44	8142	0.0054	ctrl	0.0914
1191	TTLL11	9	3084	0.0029	44	8142	0.0054	ctrl	0.0914
1192	ZC3H4	9	3084	0.0029	45	8141	0.0055	ctrl	0.0916
1193	ANO9	9	3084	0.0029	45	8141	0.0055	ctrl	0.0916
1194	PLEKHA4	7	3086	0.0023	37	8149	0.0045	ctrl	0.0921
1195	ESYT3	7	3086	0.0023	37	8149	0.0045	ctrl	0.0921
1196	ASNSD1	7	3086	0.0023	38	8148	0.0046	ctrl	0.0926
1197	PCM1	20	3073	0.0065	82	8104	0.01	ctrl	0.0936
1198	NLRP9	21	3072	0.0068	34	8152	0.0042	case	0.094
1199	FMN2	21	3072	0.0068	34	8152	0.0042	case	0.094
1200	ABCC1	24	3069	0.0078	41	8145	0.005	case	0.0942
1201	TMC8	15	3078	0.0048	22	8164	0.0027	case	0.0946
1202	GMNC	15	3078	0.0048	22	8164	0.0027	case	0.0946
1203	PEX26	4	3089	0.0013	3	8183	0.0003665	case	0.095
1204	PLD6	4	3089	0.0013	3	8183	0.0003665	case	0.095
1205	METTL21A	4	3089	0.0013	3	8183	0.0003665	case	0.095
1206	RBBP4	4	3089	0.0013	3	8183	0.0003665	case	0.095
1207	RELL1	4	3089	0.0013	3	8183	0.0003665	case	0.095
1208	RGS17	4	3089	0.0013	3	8183	0.0003665	case	0.095
1209	RAB27A	4	3089	0.0013	3	8183	0.0003665	case	0.095
1210	C10orf53	4	3089	0.0013	3	8183	0.0003665	case	0.095
1211	SGMS2	4	3089	0.0013	3	8183	0.0003665	case	0.095
1212	GSC	4	3089	0.0013	3	8183	0.0003665	case	0.095
1213	VAMP1	4	3089	0.0013	3	8183	0.0003665	case	0.095
1214	IL5	4	3089	0.0013	3	8183	0.0003665	case	0.095
1215	KCTD6	4	3089	0.0013	3	8183	0.0003665	case	0.095
1216	NKX3-1	4	3089	0.0013	3	8183	0.0003665	case	0.095
1217	GZMA	4	3089	0.0013	3	8183	0.0003665	case	0.095
1218	PLA2G12B	4	3089	0.0013	3	8183	0.0003665	case	0.095
1219	HS6ST1	4	3089	0.0013	3	8183	0.0003665	case	0.095
1220	GPIHBP1	4	3089	0.0013	3	8183	0.0003665	case	0.095
1221	C7orf34	4	3089	0.0013	3	8183	0.0003665	case	0.095
1222	MSN	4	3089	0.0013	3	8183	0.0003665	case	0.095
1223	RARRES3	4	3089	0.0013	3	8183	0.0003665	case	0.095
1224	CSF2	4	3089	0.0013	3	8183	0.0003665	case	0.095
1225	POLR2G	4	3089	0.0013	3	8183	0.0003665	case	0.095
1226	IDH3G	4	3089	0.0013	3	8183	0.0003665	case	0.095
1227	C14orf166B	4	3089	0.0013	3	8183	0.0003665	case	0.095
1228	FAM168A	4	3089	0.0013	3	8183	0.0003665	case	0.095
1229	TMEM35	4	3089	0.0013	3	8183	0.0003665	case	0.095
1230	MORN4	4	3089	0.0013	3	8183	0.0003665	case	0.095
1231	C11orf42	4	3089	0.0013	3	8183	0.0003665	case	0.095
1232	REXO2	4	3089	0.0013	3	8183	0.0003665	case	0.095
1233	RP9	4	3089	0.0013	3	8183	0.0003665	case	0.095
1234	SMLR1	4	3089	0.0013	3	8183	0.0003665	case	0.095
1235	TNFSF15	4	3089	0.0013	3	8183	0.0003665	case	0.095
1236	MRPS33	4	3089	0.0013	3	8183	0.0003665	case	0.095
1237	IFT27	4	3089	0.0013	3	8183	0.0003665	case	0.095
1238	C12orf50	4	3089	0.0013	3	8183	0.0003665	case	0.095
1239	C12orf29	4	3089	0.0013	3	8183	0.0003665	case	0.095
1240	HIST1H2AC	4	3089	0.0013	3	8183	0.0003665	case	0.095
1241	HIST1H2BI	4	3089	0.0013	3	8183	0.0003665	case	0.095
1242	ART1	4	3089	0.0013	3	8183	0.0003665	case	0.095
1243	TMEM231	4	3089	0.0013	3	8183	0.0003665	case	0.095
1244	C8orf74	4	3089	0.0013	3	8183	0.0003665	case	0.095
1245	TNXB	4	3089	0.0013	3	8183	0.0003665	case	0.095
1246	ALKBH6	4	3089	0.0013	3	8183	0.0003665	case	0.095
1247	GID8	4	3089	0.0013	3	8183	0.0003665	case	0.095
1248	COX5B	4	3089	0.0013	3	8183	0.0003665	case	0.095
1249	WISP1	4	3089	0.0013	3	8183	0.0003665	case	0.095
1250	COMMD5	4	3089	0.0013	3	8183	0.0003665	case	0.095
1251	IRX4	4	3089	0.0013	3	8183	0.0003665	case	0.095
1252	MBD3L1	4	3089	0.0013	3	8183	0.0003665	case	0.095
1253	CNOT11	4	3089	0.0013	3	8183	0.0003665	case	0.095
1254	PHF6	4	3089	0.0013	3	8183	0.0003665	case	0.095
1255	CXorf22	4	3089	0.0013	3	8183	0.0003665	case	0.095
1256	C9orf57	4	3089	0.0013	3	8183	0.0003665	case	0.095
1257	GPC4	4	3089	0.0013	3	8183	0.0003665	case	0.095
1258	CLEC2L	4	3089	0.0013	3	8183	0.0003665	case	0.095
1259	GADD45A	4	3089	0.0013	3	8183	0.0003665	case	0.095
1260	OCSTAMP	18	3075	0.0058	28	8158	0.0034	case	0.0959
1261	KPNA7	12	3081	0.0039	54	8132	0.0066	ctrl	0.0978
1262	NEU3	12	3081	0.0039	17	8169	0.0021	case	0.0978
1263	DNM3	12	3081	0.0039	17	8169	0.0021	case	0.0978
1264	XYLT2	12	3081	0.0039	17	8169	0.0021	case	0.0978
1265	SLC30A9	12	3081	0.0039	17	8169	0.0021	case	0.0978
1266	RBL2	12	3081	0.0039	17	8169	0.0021	case	0.0978
1267	LRIT1	12	3081	0.0039	17	8169	0.0021	case	0.0978
1268	ADCY8	12	3081	0.0039	17	8169	0.0021	case	0.0978
1269	ZNF790	12	3081	0.0039	17	8169	0.0021	case	0.0978
1270	ZNF843	12	3081	0.0039	17	8169	0.0021	case	0.0978
1271	ACAD9	12	3081	0.0039	17	8169	0.0021	case	0.0978
1272	ZNF280A	12	3081	0.0039	17	8169	0.0021	case	0.0978
1273	PEX19	8	3085	0.0026	9	8177	0.0011	case	0.098
1274	TRIB2	8	3085	0.0026	9	8177	0.0011	case	0.098
1275	KRTAP4-4	8	3085	0.0026	9	8177	0.0011	case	0.098
1276	KRTAP10-8	8	3085	0.0026	9	8177	0.0011	case	0.098
1277	SULT1A1	8	3085	0.0026	9	8177	0.0011	case	0.098
1278	OR51M1	8	3085	0.0026	9	8177	0.0011	case	0.098
1279	NOS1AP	8	3085	0.0026	9	8177	0.0011	case	0.098
1280	C1QA	8	3085	0.0026	9	8177	0.0011	case	0.098
1281	SLC30A7	8	3085	0.0026	9	8177	0.0011	case	0.098
1282	CACNG5	8	3085	0.0026	9	8177	0.0011	case	0.098
1283	GFAP	8	3085	0.0026	9	8177	0.0011	case	0.098
1284	OR7G1	8	3085	0.0026	9	8177	0.0011	case	0.098
1285	EXOSC8	8	3085	0.0026	9	8177	0.0011	case	0.098
1286	OR5P3	8	3085	0.0026	9	8177	0.0011	case	0.098
1287	PAX4	8	3085	0.0026	9	8177	0.0011	case	0.098
1288	WIPF1	8	3085	0.0026	9	8177	0.0011	case	0.098
1289	TPM4	8	3085	0.0026	9	8177	0.0011	case	0.098
1290	PGK2	8	3085	0.0026	9	8177	0.0011	case	0.098
1291	ZNF277	8	3085	0.0026	9	8177	0.0011	case	0.098
1292	XAF1	8	3085	0.0026	9	8177	0.0011	case	0.098
1293	A2M	28	3065	0.0091	50	8136	0.0061	case	0.0982
1294	CPZ	21	3072	0.0068	35	8151	0.0043	case	0.0987
1295	SYNPO	21	3072	0.0068	35	8151	0.0043	case	0.0987
1296	FASN	18	3075	0.0058	74	8112	0.009	ctrl	0.1003
1297	SLC9B2	10	3083	0.0032	13	8173	0.0016	case	0.1005
1298	NNMT	10	3083	0.0032	13	8173	0.0016	case	0.1005
1299	MAP3K10	10	3083	0.0032	13	8173	0.0016	case	0.1005
1300	AP5M1	10	3083	0.0032	13	8173	0.0016	case	0.1005
1301	OMG	10	3083	0.0032	13	8173	0.0016	case	0.1005
1302	ALPP	10	3083	0.0032	13	8173	0.0016	case	0.1005
1303	GALNT10	10	3083	0.0032	13	8173	0.0016	case	0.1005
1304	GAL3ST1	10	3083	0.0032	13	8173	0.0016	case	0.1005
1305	ARFGAP1	10	3083	0.0032	13	8173	0.0016	case	0.1005
1306	TRIM48	10	3083	0.0032	13	8173	0.0016	case	0.1005
1307	ALDH4A1	10	3083	0.0032	13	8173	0.0016	case	0.1005
1308	ZNF343	10	3083	0.0032	13	8173	0.0016	case	0.1005
1309	ZNF254	10	3083	0.0032	13	8173	0.0016	case	0.1005
1310	GPD1	10	3083	0.0032	13	8173	0.0016	case	0.1005
1311	BAG3	10	3083	0.0032	13	8173	0.0016	case	0.1005
1312	ZBTB4	4	3089	0.0013	26	8160	0.0032	ctrl	0.1007
1313	FYB	4	3089	0.0013	26	8160	0.0032	ctrl	0.1007
1314	NDUFA11	4	3089	0.0013	26	8160	0.0032	ctrl	0.1007
1315	SLC4A1AP	4	3089	0.0013	26	8160	0.0032	ctrl	0.1007
1316	OTUD7A	4	3089	0.0013	26	8160	0.0032	ctrl	0.1007
1317	PDGFRA	4	3089	0.0013	26	8160	0.0032	ctrl	0.1007
1318	AVL9	4	3089	0.0013	26	8160	0.0032	ctrl	0.1007
1319	MCOLN1	4	3089	0.0013	26	8160	0.0032	ctrl	0.1007
1320	DDX59	4	3089	0.0013	26	8160	0.0032	ctrl	0.1007
1321	ABCG1	4	3089	0.0013	26	8160	0.0032	ctrl	0.1007
1322	MYO5A	18	3075	0.0058	29	8157	0.0035	case	0.1019
1323	XRN1	18	3075	0.0058	29	8157	0.0035	case	0.1019
1324	ZNF268	18	3075	0.0058	29	8157	0.0035	case	0.1019
1325	THSD4	15	3078	0.0048	23	8163	0.0028	case	0.1024
1326	SAFB2	15	3078	0.0048	23	8163	0.0028	case	0.1024
1327	CAPN9	15	3078	0.0048	23	8163	0.0028	case	0.1024
1328	WDR7	10	3083	0.0032	47	8139	0.0057	ctrl	0.1024
1329	DISP1	10	3083	0.0032	47	8139	0.0057	ctrl	0.1024
1330	SPTBN1	10	3083	0.0032	47	8139	0.0057	ctrl	0.1024
1331	SPATA31A6	6	3087	0.0019	6	8180	0.000733	case	0.1025
1332	DIO3	6	3087	0.0019	6	8180	0.000733	case	0.1025
1333	RTKN	6	3087	0.0019	6	8180	0.000733	case	0.1025
1334	RNF165	6	3087	0.0019	6	8180	0.000733	case	0.1025
1335	F2R	6	3087	0.0019	6	8180	0.000733	case	0.1025
1336	EIF3L	6	3087	0.0019	6	8180	0.000733	case	0.1025
1337	CUEDC2	6	3087	0.0019	6	8180	0.000733	case	0.1025
1338	FBXL12	6	3087	0.0019	6	8180	0.000733	case	0.1025
1339	CALML3	6	3087	0.0019	6	8180	0.000733	case	0.1025
1340	HFE	6	3087	0.0019	6	8180	0.000733	case	0.1025
1341	DOK4	6	3087	0.0019	6	8180	0.000733	case	0.1025
1342	SSTR5	6	3087	0.0019	6	8180	0.000733	case	0.1025
1343	FCRL1	6	3087	0.0019	6	8180	0.000733	case	0.1025
1344	OPTC	6	3087	0.0019	6	8180	0.000733	case	0.1025
1345	BNIP1	6	3087	0.0019	6	8180	0.000733	case	0.1025
1346	OPCML	6	3087	0.0019	6	8180	0.000733	case	0.1025
1347	C7orf31	6	3087	0.0019	6	8180	0.000733	case	0.1025
1348	BEST2	6	3087	0.0019	6	8180	0.000733	case	0.1025
1349	KRTAP10-11	6	3087	0.0019	6	8180	0.000733	case	0.1025
1350	DYDC1	6	3087	0.0019	6	8180	0.000733	case	0.1025
1351	KLF3	6	3087	0.0019	6	8180	0.000733	case	0.1025
1352	SH3YL1	6	3087	0.0019	6	8180	0.000733	case	0.1025
1353	SYT11	6	3087	0.0019	6	8180	0.000733	case	0.1025
1354	STAT5B	6	3087	0.0019	6	8180	0.000733	case	0.1025
1355	TMEM202	6	3087	0.0019	6	8180	0.000733	case	0.1025
1356	FAM211A	6	3087	0.0019	6	8180	0.000733	case	0.1025
1357	FCN3	6	3087	0.0019	6	8180	0.000733	case	0.1025
1358	SNX22	6	3087	0.0019	6	8180	0.000733	case	0.1025
1359	COX18	6	3087	0.0019	6	8180	0.000733	case	0.1025
1360	ARFRP1	6	3087	0.0019	6	8180	0.000733	case	0.1025
1361	GRHPR	6	3087	0.0019	6	8180	0.000733	case	0.1025
1362	OR10G3	6	3087	0.0019	6	8180	0.000733	case	0.1025
1363	STK40	6	3087	0.0019	6	8180	0.000733	case	0.1025
1364	EGR2	6	3087	0.0019	6	8180	0.000733	case	0.1025
1365	CCDC64B	6	3087	0.0019	6	8180	0.000733	case	0.1025
1366	NDUFS6	6	3087	0.0019	6	8180	0.000733	case	0.1025
1367	CDK4	6	3087	0.0019	6	8180	0.000733	case	0.1025
1368	TULP4	10	3083	0.0032	48	8138	0.0059	ctrl	0.1033
1369	SHROOM3	10	3083	0.0032	48	8138	0.0059	ctrl	0.1033
1370	NCOA6	33	3060	0.0107	61	8125	0.0075	case	0.1038
1371	WDPCP	13	3080	0.0042	18	8168	0.0022	case	0.1039
1372	TAF2	13	3080	0.0042	18	8168	0.0022	case	0.1039
1373	KDELC1	13	3080	0.0042	18	8168	0.0022	case	0.1039
1374	KPRP	13	3080	0.0042	18	8168	0.0022	case	0.1039
1375	PDE6C	13	3080	0.0042	18	8168	0.0022	case	0.1039
1376	TMC1	13	3080	0.0042	18	8168	0.0022	case	0.1039
1377	ZNF519	13	3080	0.0042	18	8168	0.0022	case	0.1039
1378	KDM2B	13	3080	0.0042	18	8168	0.0022	case	0.1039
1379	PRDM9	8	3085	0.0026	40	8146	0.0049	ctrl	0.1056
1380	TRPM8	8	3085	0.0026	40	8146	0.0049	ctrl	0.1056
1381	TTC30B	6	3087	0.0019	33	8153	0.004	ctrl	0.1059
1382	PML	6	3087	0.0019	33	8153	0.004	ctrl	0.1059
1383	REXO1	6	3087	0.0019	33	8153	0.004	ctrl	0.1059
1384	RSPH6A	6	3087	0.0019	33	8153	0.004	ctrl	0.1059
1385	ZNF844	6	3087	0.0019	33	8153	0.004	ctrl	0.1059
1386	CCDC146	6	3087	0.0019	33	8153	0.004	ctrl	0.1059
1387	COL11A1	22	3071	0.0071	37	8149	0.0045	case	0.1064
1388	RERE	22	3071	0.0071	37	8149	0.0045	case	0.1064
1389	COL4A5	8	3085	0.0026	41	8145	0.005	ctrl	0.1069
1390	PTCHD3	8	3085	0.0026	41	8145	0.005	ctrl	0.1069
1391	PLEKHG2	13	3080	0.0042	57	8129	0.007	ctrl	0.107
1392	ZFYVE16	6	3087	0.0019	34	8152	0.0042	ctrl	0.1079
1393	PCDHB16	6	3087	0.0019	34	8152	0.0042	ctrl	0.1079
1394	RUSC2	6	3087	0.0019	34	8152	0.0042	ctrl	0.1079
1395	LMO7	13	3080	0.0042	58	8128	0.0071	ctrl	0.1081
1396	COL22A1	34	3059	0.011	63	8123	0.0077	case	0.1087
1397	TMEM67	19	3074	0.0061	31	8155	0.0038	case	0.1109
1398	ARHGEF33	19	3074	0.0061	31	8155	0.0038	case	0.1109
1399	VPS54	13	3080	0.0042	19	8167	0.0023	case	0.1112
1400	ITPKB	13	3080	0.0042	19	8167	0.0023	case	0.1112
1401	MPRIP	13	3080	0.0042	19	8167	0.0023	case	0.1112
1402	ACTN2	13	3080	0.0042	19	8167	0.0023	case	0.1112
1403	ABTB2	13	3080	0.0042	19	8167	0.0023	case	0.1112
1404	STAU2	13	3080	0.0042	19	8167	0.0023	case	0.1112
1405	KIAA1958	13	3080	0.0042	19	8167	0.0023	case	0.1112
1406	FZD10	13	3080	0.0042	19	8167	0.0023	case	0.1112
1407	C2CD5	13	3080	0.0042	19	8167	0.0023	case	0.1112
1408	DDX28	13	3080	0.0042	19	8167	0.0023	case	0.1112
1409	GIGYF2	22	3071	0.0071	38	8148	0.0046	case	0.1117
1410	GPR158	3	3090	0.0009699	21	8165	0.0026	ctrl	0.113
1411	NT5C1B-RDH14	3	3090	0.0009699	21	8165	0.0026	ctrl	0.113
1412	ATP6V0A1	3	3090	0.0009699	21	8165	0.0026	ctrl	0.113
1413	LGI4	3	3090	0.0009699	21	8165	0.0026	ctrl	0.113
1414	HOMEZ	3	3090	0.0009699	21	8165	0.0026	ctrl	0.113
1415	TEFM	3	3090	0.0009699	21	8165	0.0026	ctrl	0.113
1416	OXSM	3	3090	0.0009699	21	8165	0.0026	ctrl	0.113
1417	DHX40	3	3090	0.0009699	21	8165	0.0026	ctrl	0.113
1418	MMRN2	3	3090	0.0009699	21	8165	0.0026	ctrl	0.113
1419	TMEM143	3	3090	0.0009699	21	8165	0.0026	ctrl	0.113
1420	ATG3	3	3090	0.0009699	21	8165	0.0026	ctrl	0.113
1421	P2RX6	3	3090	0.0009699	21	8165	0.0026	ctrl	0.113
1422	EXOSC9	3	3090	0.0009699	21	8165	0.0026	ctrl	0.113
1423	SYTL3	3	3090	0.0009699	21	8165	0.0026	ctrl	0.113
1424	TOR2A	3	3090	0.0009699	21	8165	0.0026	ctrl	0.113
1425	CDC37L1	3	3090	0.0009699	21	8165	0.0026	ctrl	0.113
1426	HEATR3	3	3090	0.0009699	21	8165	0.0026	ctrl	0.113
1427	GLDN	3	3090	0.0009699	21	8165	0.0026	ctrl	0.113
1428	ZNF557	3	3090	0.0009699	21	8165	0.0026	ctrl	0.113
1429	KRT15	3	3090	0.0009699	21	8165	0.0026	ctrl	0.113
1430	SPATA6	3	3090	0.0009699	21	8165	0.0026	ctrl	0.113
1431	ZNF320	3	3090	0.0009699	21	8165	0.0026	ctrl	0.113
1432	HACE1	16	3077	0.0052	25	8161	0.0031	case	0.1133
1433	ASB10	16	3077	0.0052	25	8161	0.0031	case	0.1133
1434	TMEM247	16	3077	0.0052	25	8161	0.0031	case	0.1133
1435	CTNND2	16	3077	0.0052	25	8161	0.0031	case	0.1133
1436	RBM19	11	3082	0.0036	50	8136	0.0061	ctrl	0.1135
1437	MAP3K6	11	3082	0.0036	50	8136	0.0061	ctrl	0.1135
1438	OR4C15	3	3090	0.0009699	22	8164	0.0027	ctrl	0.1139
1439	RPUSD1	3	3090	0.0009699	22	8164	0.0027	ctrl	0.1139
1440	CDC5L	3	3090	0.0009699	22	8164	0.0027	ctrl	0.1139
1441	FMNL1	3	3090	0.0009699	22	8164	0.0027	ctrl	0.1139
1442	RBM23	3	3090	0.0009699	22	8164	0.0027	ctrl	0.1139
1443	SDPR	3	3090	0.0009699	22	8164	0.0027	ctrl	0.1139
1444	KLHL21	3	3090	0.0009699	22	8164	0.0027	ctrl	0.1139
1445	YTHDF1	3	3090	0.0009699	22	8164	0.0027	ctrl	0.1139
1446	NT5C1B	3	3090	0.0009699	22	8164	0.0027	ctrl	0.1139
1447	NMRK2	3	3090	0.0009699	22	8164	0.0027	ctrl	0.1139
1448	ZNF530	3	3090	0.0009699	22	8164	0.0027	ctrl	0.1139
1449	ZBTB42	3	3090	0.0009699	22	8164	0.0027	ctrl	0.1139
1450	PIK3IP1	3	3090	0.0009699	22	8164	0.0027	ctrl	0.1139
1451	MLLT4	11	3082	0.0036	51	8135	0.0062	ctrl	0.115
1452	EVI2A	8	3085	0.0026	10	8176	0.0012	case	0.1156
1453	TBCCD1	8	3085	0.0026	10	8176	0.0012	case	0.1156
1454	CSNK1E	8	3085	0.0026	10	8176	0.0012	case	0.1156
1455	SERPINB8	8	3085	0.0026	10	8176	0.0012	case	0.1156
1456	CHRNG	8	3085	0.0026	10	8176	0.0012	case	0.1156
1457	CXADR	8	3085	0.0026	10	8176	0.0012	case	0.1156
1458	PPP3CC	8	3085	0.0026	10	8176	0.0012	case	0.1156
1459	OSBPL2	8	3085	0.0026	10	8176	0.0012	case	0.1156
1460	SLC25A10	8	3085	0.0026	10	8176	0.0012	case	0.1156
1461	DCAF4	8	3085	0.0026	10	8176	0.0012	case	0.1156
1462	TRIM49B	8	3085	0.0026	10	8176	0.0012	case	0.1156
1463	DTX3L	8	3085	0.0026	10	8176	0.0012	case	0.1156
1464	TES	8	3085	0.0026	10	8176	0.0012	case	0.1156
1465	ARSH	8	3085	0.0026	10	8176	0.0012	case	0.1156
1466	PSMD12	8	3085	0.0026	10	8176	0.0012	case	0.1156
1467	ASPHD1	8	3085	0.0026	10	8176	0.0012	case	0.1156
1468	ARL5C	8	3085	0.0026	10	8176	0.0012	case	0.1156
1469	OR10A6	8	3085	0.0026	10	8176	0.0012	case	0.1156
1470	ZNF501	8	3085	0.0026	10	8176	0.0012	case	0.1156
1471	ZNF439	8	3085	0.0026	10	8176	0.0012	case	0.1156
1472	MSMO1	8	3085	0.0026	10	8176	0.0012	case	0.1156
1473	MAGEA6	8	3085	0.0026	10	8176	0.0012	case	0.1156
1474	ZER1	8	3085	0.0026	10	8176	0.0012	case	0.1156
1475	GNA14	8	3085	0.0026	10	8176	0.0012	case	0.1156
1476	OSGEPL1	8	3085	0.0026	10	8176	0.0012	case	0.1156
1477	LMAN1	8	3085	0.0026	10	8176	0.0012	case	0.1156
1478	FN3K	8	3085	0.0026	10	8176	0.0012	case	0.1156
1479	DEPDC5	17	3076	0.0055	70	8116	0.0086	ctrl	0.1162
1480	ZIC2	0	3093	0	8	8178	0.0009773	ctrl	0.117
1481	ZMYND11	0	3093	0	8	8178	0.0009773	ctrl	0.117
1482	MCAT	0	3093	0	8	8178	0.0009773	ctrl	0.117
1483	SPRR1A	0	3093	0	8	8178	0.0009773	ctrl	0.117
1484	EMC3	0	3093	0	8	8178	0.0009773	ctrl	0.117
1485	LPPR5	0	3093	0	8	8178	0.0009773	ctrl	0.117
1486	IQCF3	0	3093	0	8	8178	0.0009773	ctrl	0.117
1487	RAB3D	0	3093	0	8	8178	0.0009773	ctrl	0.117
1488	KRTAP9-8	0	3093	0	8	8178	0.0009773	ctrl	0.117
1489	GPR31	0	3093	0	8	8178	0.0009773	ctrl	0.117
1490	ACOT6	0	3093	0	8	8178	0.0009773	ctrl	0.117
1491	RPL36A	0	3093	0	8	8178	0.0009773	ctrl	0.117
1492	HRSP12	0	3093	0	8	8178	0.0009773	ctrl	0.117
1493	LHFP	0	3093	0	8	8178	0.0009773	ctrl	0.117
1494	KLRK1	0	3093	0	8	8178	0.0009773	ctrl	0.117
1495	KRTAP10-1	0	3093	0	8	8178	0.0009773	ctrl	0.117
1496	RAB39B	0	3093	0	8	8178	0.0009773	ctrl	0.117
1497	NRL	0	3093	0	8	8178	0.0009773	ctrl	0.117
1498	CST5	0	3093	0	8	8178	0.0009773	ctrl	0.117
1499	MRPL21	0	3093	0	8	8178	0.0009773	ctrl	0.117
1500	MRPL42	0	3093	0	8	8178	0.0009773	ctrl	0.117
1501	GBAS	0	3093	0	8	8178	0.0009773	ctrl	0.117
1502	RNASE2	0	3093	0	8	8178	0.0009773	ctrl	0.117
1503	CETN1	0	3093	0	8	8178	0.0009773	ctrl	0.117
1504	MAD2L1	0	3093	0	8	8178	0.0009773	ctrl	0.117
1505	DHFRL1	0	3093	0	8	8178	0.0009773	ctrl	0.117
1506	RRAGB	0	3093	0	8	8178	0.0009773	ctrl	0.117
1507	OR2C3	0	3093	0	8	8178	0.0009773	ctrl	0.117
1508	ATF7	0	3093	0	8	8178	0.0009773	ctrl	0.117
1509	OR4N4	0	3093	0	8	8178	0.0009773	ctrl	0.117
1510	WTIP	0	3093	0	8	8178	0.0009773	ctrl	0.117
1511	TSPAN31	0	3093	0	8	8178	0.0009773	ctrl	0.117
1512	NUDT1	0	3093	0	8	8178	0.0009773	ctrl	0.117
1513	MGARP	0	3093	0	8	8178	0.0009773	ctrl	0.117
1514	IL19	0	3093	0	8	8178	0.0009773	ctrl	0.117
1515	HIC1	0	3093	0	8	8178	0.0009773	ctrl	0.117
1516	SNRPC	0	3093	0	8	8178	0.0009773	ctrl	0.117
1517	YY2	0	3093	0	8	8178	0.0009773	ctrl	0.117
1518	RQCD1	0	3093	0	8	8178	0.0009773	ctrl	0.117
1519	RGS8	0	3093	0	8	8178	0.0009773	ctrl	0.117
1520	GSK3B	0	3093	0	8	8178	0.0009773	ctrl	0.117
1521	TMEM55A	0	3093	0	8	8178	0.0009773	ctrl	0.117
1522	FITM1	0	3093	0	8	8178	0.0009773	ctrl	0.117
1523	CTDSP2	0	3093	0	8	8178	0.0009773	ctrl	0.117
1524	OR8B3	0	3093	0	8	8178	0.0009773	ctrl	0.117
1525	PABPN1L	0	3093	0	8	8178	0.0009773	ctrl	0.117
1526	PHLDA3	0	3093	0	8	8178	0.0009773	ctrl	0.117
1527	SASH3	0	3093	0	8	8178	0.0009773	ctrl	0.117
1528	SPA17	0	3093	0	8	8178	0.0009773	ctrl	0.117
1529	FIP1L1	0	3093	0	8	8178	0.0009773	ctrl	0.117
1530	KRTCAP2	0	3093	0	8	8178	0.0009773	ctrl	0.117
1531	CCNK	0	3093	0	8	8178	0.0009773	ctrl	0.117
1532	ZFP36L1	0	3093	0	8	8178	0.0009773	ctrl	0.117
1533	NPAT	9	3084	0.0029	43	8143	0.0053	ctrl	0.119
1534	SLC22A1	11	3082	0.0036	15	8171	0.0018	case	0.1202
1535	TRNT1	11	3082	0.0036	15	8171	0.0018	case	0.1202
1536	TMEM44	11	3082	0.0036	15	8171	0.0018	case	0.1202
1537	HDAC11	11	3082	0.0036	15	8171	0.0018	case	0.1202
1538	PROS1	11	3082	0.0036	15	8171	0.0018	case	0.1202
1539	IQSEC2	11	3082	0.0036	15	8171	0.0018	case	0.1202
1540	STAM	11	3082	0.0036	15	8171	0.0018	case	0.1202
1541	NCOA1	20	3073	0.0065	33	8153	0.004	case	0.1211
1542	MYO6	20	3073	0.0065	33	8153	0.004	case	0.1211
1543	KDM3B	20	3073	0.0065	33	8153	0.004	case	0.1211
1544	NNT	16	3077	0.0052	26	8160	0.0032	case	0.1218
1545	PAN2	16	3077	0.0052	26	8160	0.0032	case	0.1218
1546	KIAA0020	16	3077	0.0052	26	8160	0.0032	case	0.1218
1547	ZNF273	16	3077	0.0052	26	8160	0.0032	case	0.1218
1548	KIAA1324	16	3077	0.0052	26	8160	0.0032	case	0.1218
1549	ABCC9	16	3077	0.0052	26	8160	0.0032	case	0.1218
1550	SCAND3	5	3088	0.0016	28	8158	0.0034	ctrl	0.1224
1551	EXTL1	5	3088	0.0016	28	8158	0.0034	ctrl	0.1224
1552	PSG6	5	3088	0.0016	28	8158	0.0034	ctrl	0.1224
1553	EPS8L1	5	3088	0.0016	28	8158	0.0034	ctrl	0.1224
1554	PNN	5	3088	0.0016	28	8158	0.0034	ctrl	0.1224
1555	EPHA2	5	3088	0.0016	28	8158	0.0034	ctrl	0.1224
1556	SEZ6L2	5	3088	0.0016	28	8158	0.0034	ctrl	0.1224
1557	CDH4	5	3088	0.0016	28	8158	0.0034	ctrl	0.1224
1558	HRC	5	3088	0.0016	29	8157	0.0035	ctrl	0.1224
1559	FCRL5	5	3088	0.0016	29	8157	0.0035	ctrl	0.1224
1560	MAP3K11	5	3088	0.0016	29	8157	0.0035	ctrl	0.1224
1561	APC2	5	3088	0.0016	29	8157	0.0035	ctrl	0.1224
1562	DHX58	5	3088	0.0016	29	8157	0.0035	ctrl	0.1224
1563	TMEM194B	5	3088	0.0016	29	8157	0.0035	ctrl	0.1224
1564	KIRREL3	5	3088	0.0016	29	8157	0.0035	ctrl	0.1224
1565	INPP5B	5	3088	0.0016	29	8157	0.0035	ctrl	0.1224
1566	MPEG1	5	3088	0.0016	29	8157	0.0035	ctrl	0.1224
1567	PMS2	7	3086	0.0023	36	8150	0.0044	ctrl	0.1227
1568	SHPRH	7	3086	0.0023	36	8150	0.0044	ctrl	0.1227
1569	SRGAP3	7	3086	0.0023	36	8150	0.0044	ctrl	0.1227
1570	DUS3L	7	3086	0.0023	36	8150	0.0044	ctrl	0.1227
1571	TMEM132A	7	3086	0.0023	36	8150	0.0044	ctrl	0.1227
1572	ATXN1	7	3086	0.0023	36	8150	0.0044	ctrl	0.1227
1573	FBXO43	2	3091	0.0006466	17	8169	0.0021	ctrl	0.1238
1574	RRM2	2	3091	0.0006466	17	8169	0.0021	ctrl	0.1238
1575	DAO	2	3091	0.0006466	17	8169	0.0021	ctrl	0.1238
1576	SLC20A2	2	3091	0.0006466	17	8169	0.0021	ctrl	0.1238
1577	LCP2	2	3091	0.0006466	17	8169	0.0021	ctrl	0.1238
1578	KAL1	2	3091	0.0006466	17	8169	0.0021	ctrl	0.1238
1579	DPH6	2	3091	0.0006466	17	8169	0.0021	ctrl	0.1238
1580	IFNAR1	2	3091	0.0006466	17	8169	0.0021	ctrl	0.1238
1581	OR51D1	2	3091	0.0006466	17	8169	0.0021	ctrl	0.1238
1582	AIFM2	2	3091	0.0006466	17	8169	0.0021	ctrl	0.1238
1583	CCDC34	2	3091	0.0006466	17	8169	0.0021	ctrl	0.1238
1584	FBXO9	2	3091	0.0006466	17	8169	0.0021	ctrl	0.1238
1585	PDGFRL	2	3091	0.0006466	17	8169	0.0021	ctrl	0.1238
1586	TMBIM6	2	3091	0.0006466	17	8169	0.0021	ctrl	0.1238
1587	VCAM1	2	3091	0.0006466	17	8169	0.0021	ctrl	0.1238
1588	CDC14B	2	3091	0.0006466	17	8169	0.0021	ctrl	0.1238
1589	KRT9	2	3091	0.0006466	17	8169	0.0021	ctrl	0.1238
1590	RFNG	2	3091	0.0006466	17	8169	0.0021	ctrl	0.1238
1591	RWDD2B	2	3091	0.0006466	17	8169	0.0021	ctrl	0.1238
1592	ZNF799	2	3091	0.0006466	17	8169	0.0021	ctrl	0.1238
1593	GLT8D2	2	3091	0.0006466	17	8169	0.0021	ctrl	0.1238
1594	NPEPL1	2	3091	0.0006466	17	8169	0.0021	ctrl	0.1238
1595	ZNF682	2	3091	0.0006466	17	8169	0.0021	ctrl	0.1238
1596	ZNF701	2	3091	0.0006466	17	8169	0.0021	ctrl	0.1238
1597	ZNF488	2	3091	0.0006466	17	8169	0.0021	ctrl	0.1238
1598	ST8SIA6	2	3091	0.0006466	17	8169	0.0021	ctrl	0.1238
1599	DCTN4	2	3091	0.0006466	17	8169	0.0021	ctrl	0.1238
1600	BAP1	2	3091	0.0006466	17	8169	0.0021	ctrl	0.1238
1601	POLE	18	3075	0.0058	73	8113	0.0089	ctrl	0.1243
1602	PLCE1	12	3081	0.0039	52	8134	0.0064	ctrl	0.1246
1603	MXRA5	15	3078	0.0048	62	8124	0.0076	ctrl	0.1253
1604	CACNA1G	15	3078	0.0048	62	8124	0.0076	ctrl	0.1253
1605	MAGI2	17	3076	0.0055	27	8159	0.0033	case	0.1256
1606	TLE6	17	3076	0.0055	27	8159	0.0033	case	0.1256
1607	PIGQ	17	3076	0.0055	27	8159	0.0033	case	0.1256
1608	CHD9	15	3078	0.0048	63	8123	0.0077	ctrl	0.1257
1609	CDC42BPB	15	3078	0.0048	63	8123	0.0077	ctrl	0.1257
1610	RAI1	15	3078	0.0048	63	8123	0.0077	ctrl	0.1257
1611	QRICH2	15	3078	0.0048	63	8123	0.0077	ctrl	0.1257
1612	CCDC171	15	3078	0.0048	63	8123	0.0077	ctrl	0.1257
1613	PEG3	20	3073	0.0065	34	8152	0.0042	case	0.1259
1614	SSH2	20	3073	0.0065	34	8152	0.0042	case	0.1259
1615	MC2R	0	3093	0	9	8177	0.0011	ctrl	0.126
1616	HS3ST6	0	3093	0	9	8177	0.0011	ctrl	0.126
1617	PPAPDC2	0	3093	0	9	8177	0.0011	ctrl	0.126
1618	DPT	0	3093	0	9	8177	0.0011	ctrl	0.126
1619	RTP3	0	3093	0	9	8177	0.0011	ctrl	0.126
1620	GPR82	0	3093	0	9	8177	0.0011	ctrl	0.126
1621	SYCP3	0	3093	0	9	8177	0.0011	ctrl	0.126
1622	LYPD5	0	3093	0	9	8177	0.0011	ctrl	0.126
1623	C6orf163	0	3093	0	9	8177	0.0011	ctrl	0.126
1624	XKR6	0	3093	0	9	8177	0.0011	ctrl	0.126
1625	SBSPON	0	3093	0	9	8177	0.0011	ctrl	0.126
1626	BCL7A	0	3093	0	9	8177	0.0011	ctrl	0.126
1627	CAB39	0	3093	0	9	8177	0.0011	ctrl	0.126
1628	ODF3B	0	3093	0	9	8177	0.0011	ctrl	0.126
1629	WNT3A	0	3093	0	9	8177	0.0011	ctrl	0.126
1630	SERF2	0	3093	0	9	8177	0.0011	ctrl	0.126
1631	CENPBD1	0	3093	0	9	8177	0.0011	ctrl	0.126
1632	TFF2	0	3093	0	9	8177	0.0011	ctrl	0.126
1633	COPRS	0	3093	0	9	8177	0.0011	ctrl	0.126
1634	AVPR2	0	3093	0	9	8177	0.0011	ctrl	0.126
1635	LRG1	0	3093	0	9	8177	0.0011	ctrl	0.126
1636	PDDC1	0	3093	0	9	8177	0.0011	ctrl	0.126
1637	TRMT2B	0	3093	0	9	8177	0.0011	ctrl	0.126
1638	TLDC2	0	3093	0	9	8177	0.0011	ctrl	0.126
1639	ELAVL1	0	3093	0	9	8177	0.0011	ctrl	0.126
1640	LPAR6	0	3093	0	9	8177	0.0011	ctrl	0.126
1641	GET4	0	3093	0	9	8177	0.0011	ctrl	0.126
1642	NEURL	0	3093	0	9	8177	0.0011	ctrl	0.126
1643	DDOST	0	3093	0	9	8177	0.0011	ctrl	0.126
1644	ATP5B	0	3093	0	9	8177	0.0011	ctrl	0.126
1645	EXOSC4	0	3093	0	9	8177	0.0011	ctrl	0.126
1646	ASNA1	0	3093	0	9	8177	0.0011	ctrl	0.126
1647	UCHL5	0	3093	0	9	8177	0.0011	ctrl	0.126
1648	OR6K2	0	3093	0	9	8177	0.0011	ctrl	0.126
1649	HMX3	0	3093	0	9	8177	0.0011	ctrl	0.126
1650	COMMD8	0	3093	0	9	8177	0.0011	ctrl	0.126
1651	BRMS1L	0	3093	0	9	8177	0.0011	ctrl	0.126
1652	PHLDA1	0	3093	0	9	8177	0.0011	ctrl	0.126
1653	APOBEC1	0	3093	0	9	8177	0.0011	ctrl	0.126
1654	SEC62	0	3093	0	9	8177	0.0011	ctrl	0.126
1655	LCE1E	0	3093	0	9	8177	0.0011	ctrl	0.126
1656	CDK8	0	3093	0	9	8177	0.0011	ctrl	0.126
1657	ABCF1	0	3093	0	9	8177	0.0011	ctrl	0.126
1658	BCAR3	14	3079	0.0045	21	8165	0.0026	case	0.1266
1659	CLIP2	14	3079	0.0045	21	8165	0.0026	case	0.1266
1660	EPB41L4A	14	3079	0.0045	21	8165	0.0026	case	0.1266
1661	SLTM	14	3079	0.0045	21	8165	0.0026	case	0.1266
1662	UNC79	24	3069	0.0078	42	8144	0.0051	case	0.1267
1663	SDAD1	2	3091	0.0006466	18	8168	0.0022	ctrl	0.1282
1664	CPM	2	3091	0.0006466	18	8168	0.0022	ctrl	0.1282
1665	AAAS	2	3091	0.0006466	18	8168	0.0022	ctrl	0.1282
1666	DYM	2	3091	0.0006466	18	8168	0.0022	ctrl	0.1282
1667	NFKBIZ	2	3091	0.0006466	18	8168	0.0022	ctrl	0.1282
1668	GPR50	2	3091	0.0006466	18	8168	0.0022	ctrl	0.1282
1669	PAQR5	2	3091	0.0006466	18	8168	0.0022	ctrl	0.1282
1670	RFTN1	2	3091	0.0006466	18	8168	0.0022	ctrl	0.1282
1671	MAPKAP1	2	3091	0.0006466	18	8168	0.0022	ctrl	0.1282
1672	DPH2	2	3091	0.0006466	18	8168	0.0022	ctrl	0.1282
1673	SUZ12	2	3091	0.0006466	18	8168	0.0022	ctrl	0.1282
1674	SFRP2	2	3091	0.0006466	18	8168	0.0022	ctrl	0.1282
1675	KCNJ13	2	3091	0.0006466	18	8168	0.0022	ctrl	0.1282
1676	NSMF	2	3091	0.0006466	18	8168	0.0022	ctrl	0.1282
1677	CHRNA6	2	3091	0.0006466	18	8168	0.0022	ctrl	0.1282
1678	KDELC2	2	3091	0.0006466	18	8168	0.0022	ctrl	0.1282
1679	ANGPTL1	2	3091	0.0006466	18	8168	0.0022	ctrl	0.1282
1680	VNN1	2	3091	0.0006466	18	8168	0.0022	ctrl	0.1282
1681	ABHD12B	2	3091	0.0006466	18	8168	0.0022	ctrl	0.1282
1682	LILRA5	2	3091	0.0006466	18	8168	0.0022	ctrl	0.1282
1683	DTNBP1	2	3091	0.0006466	18	8168	0.0022	ctrl	0.1282
1684	STAT5A	2	3091	0.0006466	18	8168	0.0022	ctrl	0.1282
1685	FGF3	2	3091	0.0006466	18	8168	0.0022	ctrl	0.1282
1686	TBC1D15	2	3091	0.0006466	18	8168	0.0022	ctrl	0.1282
1687	HSF2	2	3091	0.0006466	18	8168	0.0022	ctrl	0.1282
1688	MGAT4A	2	3091	0.0006466	18	8168	0.0022	ctrl	0.1282
1689	HTR6	3	3090	0.0009699	2	8184	0.0002443	case	0.1306
1690	GSTM3	3	3090	0.0009699	2	8184	0.0002443	case	0.1306
1691	RABGGTB	3	3090	0.0009699	2	8184	0.0002443	case	0.1306
1692	CARD18	3	3090	0.0009699	2	8184	0.0002443	case	0.1306
1693	C1orf111	3	3090	0.0009699	2	8184	0.0002443	case	0.1306
1694	C6orf52	3	3090	0.0009699	2	8184	0.0002443	case	0.1306
1695	NTPCR	3	3090	0.0009699	2	8184	0.0002443	case	0.1306
1696	TMEM200C	3	3090	0.0009699	2	8184	0.0002443	case	0.1306
1697	RPL24	3	3090	0.0009699	2	8184	0.0002443	case	0.1306
1698	RPL29	3	3090	0.0009699	2	8184	0.0002443	case	0.1306
1699	GPR150	3	3090	0.0009699	2	8184	0.0002443	case	0.1306
1700	PTBP2	3	3090	0.0009699	2	8184	0.0002443	case	0.1306
1701	IGFL4	3	3090	0.0009699	2	8184	0.0002443	case	0.1306
1702	RPP25	3	3090	0.0009699	2	8184	0.0002443	case	0.1306
1703	HIGD2A	3	3090	0.0009699	2	8184	0.0002443	case	0.1306
1704	DND1	3	3090	0.0009699	2	8184	0.0002443	case	0.1306
1705	SMAGP	3	3090	0.0009699	2	8184	0.0002443	case	0.1306
1706	SPIN3	3	3090	0.0009699	2	8184	0.0002443	case	0.1306
1707	CNFN	3	3090	0.0009699	2	8184	0.0002443	case	0.1306
1708	PARK7	3	3090	0.0009699	2	8184	0.0002443	case	0.1306
1709	RPS12	3	3090	0.0009699	2	8184	0.0002443	case	0.1306
1710	NPC2	3	3090	0.0009699	2	8184	0.0002443	case	0.1306
1711	NAA30	3	3090	0.0009699	2	8184	0.0002443	case	0.1306
1712	BET1L	3	3090	0.0009699	2	8184	0.0002443	case	0.1306
1713	NQO2	3	3090	0.0009699	2	8184	0.0002443	case	0.1306
1714	NRG4	3	3090	0.0009699	2	8184	0.0002443	case	0.1306
1715	UFC1	3	3090	0.0009699	2	8184	0.0002443	case	0.1306
1716	UBXN2A	3	3090	0.0009699	2	8184	0.0002443	case	0.1306
1717	PSMA1	3	3090	0.0009699	2	8184	0.0002443	case	0.1306
1718	SBK1	3	3090	0.0009699	2	8184	0.0002443	case	0.1306
1719	C4orf51	3	3090	0.0009699	2	8184	0.0002443	case	0.1306
1720	TCF21	3	3090	0.0009699	2	8184	0.0002443	case	0.1306
1721	BRK1	3	3090	0.0009699	2	8184	0.0002443	case	0.1306
1722	C4orf40	3	3090	0.0009699	2	8184	0.0002443	case	0.1306
1723	DUSP22	3	3090	0.0009699	2	8184	0.0002443	case	0.1306
1724	SMIM3	3	3090	0.0009699	2	8184	0.0002443	case	0.1306
1725	ZNF69	3	3090	0.0009699	2	8184	0.0002443	case	0.1306
1726	FGF19	3	3090	0.0009699	2	8184	0.0002443	case	0.1306
1727	NDNL2	3	3090	0.0009699	2	8184	0.0002443	case	0.1306
1728	HIST1H2BD	3	3090	0.0009699	2	8184	0.0002443	case	0.1306
1729	HPCAL1	3	3090	0.0009699	2	8184	0.0002443	case	0.1306
1730	PPP1R14D	3	3090	0.0009699	2	8184	0.0002443	case	0.1306
1731	EIF4A2	3	3090	0.0009699	2	8184	0.0002443	case	0.1306
1732	TMEM159	3	3090	0.0009699	2	8184	0.0002443	case	0.1306
1733	CBLN2	3	3090	0.0009699	2	8184	0.0002443	case	0.1306
1734	WAS	3	3090	0.0009699	2	8184	0.0002443	case	0.1306
1735	TOMM5	3	3090	0.0009699	2	8184	0.0002443	case	0.1306
1736	OR2D2	3	3090	0.0009699	2	8184	0.0002443	case	0.1306
1737	DNAJC27	3	3090	0.0009699	2	8184	0.0002443	case	0.1306
1738	ATP6V1F	3	3090	0.0009699	2	8184	0.0002443	case	0.1306
1739	LIN52	3	3090	0.0009699	2	8184	0.0002443	case	0.1306
1740	POU3F4	3	3090	0.0009699	2	8184	0.0002443	case	0.1306
1741	TMEM256	3	3090	0.0009699	2	8184	0.0002443	case	0.1306
1742	C8orf46	3	3090	0.0009699	2	8184	0.0002443	case	0.1306
1743	ZC3HAV1L	3	3090	0.0009699	2	8184	0.0002443	case	0.1306
1744	TACSTD2	3	3090	0.0009699	2	8184	0.0002443	case	0.1306
1745	PRR11	3	3090	0.0009699	2	8184	0.0002443	case	0.1306
1746	GRXCR1	3	3090	0.0009699	2	8184	0.0002443	case	0.1306
1747	ATPIF1	3	3090	0.0009699	2	8184	0.0002443	case	0.1306
1748	OR6C6	3	3090	0.0009699	2	8184	0.0002443	case	0.1306
1749	C6orf201	3	3090	0.0009699	2	8184	0.0002443	case	0.1306
1750	FGF8	3	3090	0.0009699	2	8184	0.0002443	case	0.1306
1751	C2orf47	3	3090	0.0009699	2	8184	0.0002443	case	0.1306
1752	JMJD7	3	3090	0.0009699	2	8184	0.0002443	case	0.1306
1753	ITGB3BP	3	3090	0.0009699	2	8184	0.0002443	case	0.1306
1754	MED19	3	3090	0.0009699	2	8184	0.0002443	case	0.1306
1755	ARPC5	3	3090	0.0009699	2	8184	0.0002443	case	0.1306
1756	GNAZ	3	3090	0.0009699	2	8184	0.0002443	case	0.1306
1757	LCE1F	3	3090	0.0009699	2	8184	0.0002443	case	0.1306
1758	ARMCX3	3	3090	0.0009699	2	8184	0.0002443	case	0.1306
1759	RDH11	1	3092	0.0003233	12	8174	0.0015	ctrl	0.131
1760	GRM5	1	3092	0.0003233	12	8174	0.0015	ctrl	0.131
1761	CPO	1	3092	0.0003233	12	8174	0.0015	ctrl	0.131
1762	ACTL6A	1	3092	0.0003233	12	8174	0.0015	ctrl	0.131
1763	SMARCD1	1	3092	0.0003233	12	8174	0.0015	ctrl	0.131
1764	STRBP	1	3092	0.0003233	12	8174	0.0015	ctrl	0.131
1765	CISD3	1	3092	0.0003233	12	8174	0.0015	ctrl	0.131
1766	VAT1	1	3092	0.0003233	12	8174	0.0015	ctrl	0.131
1767	SLC38A1	1	3092	0.0003233	12	8174	0.0015	ctrl	0.131
1768	MBOAT2	1	3092	0.0003233	12	8174	0.0015	ctrl	0.131
1769	IDS	1	3092	0.0003233	12	8174	0.0015	ctrl	0.131
1770	FCRLB	1	3092	0.0003233	12	8174	0.0015	ctrl	0.131
1771	PSTK	1	3092	0.0003233	12	8174	0.0015	ctrl	0.131
1772	SLC25A11	1	3092	0.0003233	12	8174	0.0015	ctrl	0.131
1773	KCNJ12	1	3092	0.0003233	12	8174	0.0015	ctrl	0.131
1774	KLRG2	1	3092	0.0003233	12	8174	0.0015	ctrl	0.131
1775	SFTPB	1	3092	0.0003233	12	8174	0.0015	ctrl	0.131
1776	CABP4	1	3092	0.0003233	12	8174	0.0015	ctrl	0.131
1777	DGAT2L6	1	3092	0.0003233	12	8174	0.0015	ctrl	0.131
1778	CAPNS1	1	3092	0.0003233	12	8174	0.0015	ctrl	0.131
1779	EGLN2	1	3092	0.0003233	12	8174	0.0015	ctrl	0.131
1780	SRR	1	3092	0.0003233	12	8174	0.0015	ctrl	0.131
1781	LDHAL6A	1	3092	0.0003233	12	8174	0.0015	ctrl	0.131
1782	OR1E2	1	3092	0.0003233	12	8174	0.0015	ctrl	0.131
1783	ASGR2	1	3092	0.0003233	12	8174	0.0015	ctrl	0.131
1784	OR2M2	1	3092	0.0003233	12	8174	0.0015	ctrl	0.131
1785	RBP4	1	3092	0.0003233	12	8174	0.0015	ctrl	0.131
1786	TAS2R40	1	3092	0.0003233	12	8174	0.0015	ctrl	0.131
1787	SFR1	1	3092	0.0003233	12	8174	0.0015	ctrl	0.131
1788	CBLN3	1	3092	0.0003233	12	8174	0.0015	ctrl	0.131
1789	WT1	1	3092	0.0003233	12	8174	0.0015	ctrl	0.131
1790	TFAP2D	1	3092	0.0003233	12	8174	0.0015	ctrl	0.131
1791	SUPT16H	1	3092	0.0003233	12	8174	0.0015	ctrl	0.131
1792	ADAP1	1	3092	0.0003233	12	8174	0.0015	ctrl	0.131
1793	EBF3	1	3092	0.0003233	12	8174	0.0015	ctrl	0.131
1794	CAMK4	1	3092	0.0003233	12	8174	0.0015	ctrl	0.131
1795	GNPDA1	1	3092	0.0003233	12	8174	0.0015	ctrl	0.131
1796	PBX4	1	3092	0.0003233	12	8174	0.0015	ctrl	0.131
1797	COX10	1	3092	0.0003233	12	8174	0.0015	ctrl	0.131
1798	TNFAIP1	1	3092	0.0003233	12	8174	0.0015	ctrl	0.131
1799	F2RL1	1	3092	0.0003233	12	8174	0.0015	ctrl	0.131
1800	SLC16A1	1	3092	0.0003233	12	8174	0.0015	ctrl	0.131
1801	2019-03-08	1	3092	0.0003233	12	8174	0.0015	ctrl	0.131
1802	OCLN	1	3092	0.0003233	12	8174	0.0015	ctrl	0.131
1803	PLA2G3	1	3092	0.0003233	12	8174	0.0015	ctrl	0.131
1804	TMEM255A	1	3092	0.0003233	12	8174	0.0015	ctrl	0.131
1805	SPZ1	1	3092	0.0003233	12	8174	0.0015	ctrl	0.131
1806	CAV2	1	3092	0.0003233	12	8174	0.0015	ctrl	0.131
1807	NAT6	1	3092	0.0003233	12	8174	0.0015	ctrl	0.131
1808	GPX2	1	3092	0.0003233	12	8174	0.0015	ctrl	0.131
1809	AURKAIP1	1	3092	0.0003233	12	8174	0.0015	ctrl	0.131
1810	MYPN	24	3069	0.0078	43	8143	0.0053	case	0.1311
1811	BCAS2	1	3092	0.0003233	13	8173	0.0016	ctrl	0.1313
1812	ST3GAL5	1	3092	0.0003233	13	8173	0.0016	ctrl	0.1313
1813	GSTA3	1	3092	0.0003233	13	8173	0.0016	ctrl	0.1313
1814	KLK11	1	3092	0.0003233	13	8173	0.0016	ctrl	0.1313
1815	MSRB1	1	3092	0.0003233	13	8173	0.0016	ctrl	0.1313
1816	B3GNT7	1	3092	0.0003233	13	8173	0.0016	ctrl	0.1313
1817	ZNF3	1	3092	0.0003233	13	8173	0.0016	ctrl	0.1313
1818	KANK3	1	3092	0.0003233	13	8173	0.0016	ctrl	0.1313
1819	TM4SF4	1	3092	0.0003233	13	8173	0.0016	ctrl	0.1313
1820	HNF4A	1	3092	0.0003233	13	8173	0.0016	ctrl	0.1313
1821	PSEN2	1	3092	0.0003233	13	8173	0.0016	ctrl	0.1313
1822	SERPINB9	1	3092	0.0003233	13	8173	0.0016	ctrl	0.1313
1823	BPNT1	1	3092	0.0003233	13	8173	0.0016	ctrl	0.1313
1824	MTHFD2	1	3092	0.0003233	13	8173	0.0016	ctrl	0.1313
1825	RERGL	1	3092	0.0003233	13	8173	0.0016	ctrl	0.1313
1826	ZDHHC21	1	3092	0.0003233	13	8173	0.0016	ctrl	0.1313
1827	TAF9	1	3092	0.0003233	13	8173	0.0016	ctrl	0.1313
1828	FZD7	1	3092	0.0003233	13	8173	0.0016	ctrl	0.1313
1829	NEUROD6	1	3092	0.0003233	13	8173	0.0016	ctrl	0.1313
1830	METAP1	1	3092	0.0003233	13	8173	0.0016	ctrl	0.1313
1831	CXCR5	1	3092	0.0003233	13	8173	0.0016	ctrl	0.1313
1832	ACTR3	1	3092	0.0003233	13	8173	0.0016	ctrl	0.1313
1833	CHRNB2	1	3092	0.0003233	13	8173	0.0016	ctrl	0.1313
1834	TMEM33	1	3092	0.0003233	13	8173	0.0016	ctrl	0.1313
1835	UGT1A10	1	3092	0.0003233	13	8173	0.0016	ctrl	0.1313
1836	SCARB2	1	3092	0.0003233	13	8173	0.0016	ctrl	0.1313
1837	PRSS50	1	3092	0.0003233	13	8173	0.0016	ctrl	0.1313
1838	SDS	1	3092	0.0003233	13	8173	0.0016	ctrl	0.1313
1839	FBXO4	1	3092	0.0003233	13	8173	0.0016	ctrl	0.1313
1840	CRYGS	1	3092	0.0003233	13	8173	0.0016	ctrl	0.1313
1841	CRYGD	1	3092	0.0003233	13	8173	0.0016	ctrl	0.1313
1842	RILPL1	1	3092	0.0003233	13	8173	0.0016	ctrl	0.1313
1843	FGFR1OP	1	3092	0.0003233	13	8173	0.0016	ctrl	0.1313
1844	TMEM198	1	3092	0.0003233	13	8173	0.0016	ctrl	0.1313
1845	RRAGC	1	3092	0.0003233	13	8173	0.0016	ctrl	0.1313
1846	RRAGD	1	3092	0.0003233	13	8173	0.0016	ctrl	0.1313
1847	EPHX3	1	3092	0.0003233	13	8173	0.0016	ctrl	0.1313
1848	TMEM230	1	3092	0.0003233	13	8173	0.0016	ctrl	0.1313
1849	MXI1	1	3092	0.0003233	13	8173	0.0016	ctrl	0.1313
1850	MYL1	1	3092	0.0003233	13	8173	0.0016	ctrl	0.1313
1851	VSX1	1	3092	0.0003233	13	8173	0.0016	ctrl	0.1313
1852	HOXB7	1	3092	0.0003233	13	8173	0.0016	ctrl	0.1313
1853	TINAGL1	1	3092	0.0003233	13	8173	0.0016	ctrl	0.1313
1854	ELAC1	1	3092	0.0003233	13	8173	0.0016	ctrl	0.1313
1855	MTMR1	1	3092	0.0003233	13	8173	0.0016	ctrl	0.1313
1856	CCHCR1	1	3092	0.0003233	13	8173	0.0016	ctrl	0.1313
1857	SPATA4	1	3092	0.0003233	13	8173	0.0016	ctrl	0.1313
1858	CCDC85C	1	3092	0.0003233	13	8173	0.0016	ctrl	0.1313
1859	LDLRAD1	1	3092	0.0003233	13	8173	0.0016	ctrl	0.1313
1860	HNRNPK	1	3092	0.0003233	13	8173	0.0016	ctrl	0.1313
1861	METTL1	1	3092	0.0003233	13	8173	0.0016	ctrl	0.1313
1862	HRH3	1	3092	0.0003233	13	8173	0.0016	ctrl	0.1313
1863	PIGA	1	3092	0.0003233	13	8173	0.0016	ctrl	0.1313
1864	CCR3	1	3092	0.0003233	13	8173	0.0016	ctrl	0.1313
1865	CD46	1	3092	0.0003233	13	8173	0.0016	ctrl	0.1313
1866	HAVCR2	1	3092	0.0003233	13	8173	0.0016	ctrl	0.1313
1867	GPR4	1	3092	0.0003233	13	8173	0.0016	ctrl	0.1313
1868	USP17L2	1	3092	0.0003233	13	8173	0.0016	ctrl	0.1313
1869	ERBB2	17	3076	0.0055	28	8158	0.0034	case	0.1317
1870	ZNF880	17	3076	0.0055	28	8158	0.0034	case	0.1317
1871	TTBK1	17	3076	0.0055	28	8158	0.0034	case	0.1317
1872	ADCY6	17	3076	0.0055	28	8158	0.0034	case	0.1317
1873	ZNF675	17	3076	0.0055	28	8158	0.0034	case	0.1317
1874	SLITRK1	11	3082	0.0036	16	8170	0.002	case	0.1317
1875	PSAPL1	11	3082	0.0036	16	8170	0.002	case	0.1317
1876	PARK2	11	3082	0.0036	16	8170	0.002	case	0.1317
1877	RAG1	11	3082	0.0036	16	8170	0.002	case	0.1317
1878	FURIN	11	3082	0.0036	16	8170	0.002	case	0.1317
1879	CD163	11	3082	0.0036	16	8170	0.002	case	0.1317
1880	ZNF750	11	3082	0.0036	16	8170	0.002	case	0.1317
1881	ZNF670	11	3082	0.0036	16	8170	0.002	case	0.1317
1882	SLC22A14	11	3082	0.0036	16	8170	0.002	case	0.1317
1883	SLC12A1	10	3083	0.0032	45	8141	0.0055	ctrl	0.1322
1884	C5orf42	33	3060	0.0107	62	8124	0.0076	case	0.1324
1885	CAMTA1	10	3083	0.0032	46	8140	0.0056	ctrl	0.1324
1886	FLYWCH1	10	3083	0.0032	46	8140	0.0056	ctrl	0.1324
1887	CYP24A1	10	3083	0.0032	46	8140	0.0056	ctrl	0.1324
1888	SLC26A1	14	3079	0.0045	22	8164	0.0027	case	0.1347
1889	ERCC6-PGBD3	14	3079	0.0045	22	8164	0.0027	case	0.1347
1890	TDP1	14	3079	0.0045	22	8164	0.0027	case	0.1347
1891	PDE4A	14	3079	0.0045	22	8164	0.0027	case	0.1347
1892	HEATR4	14	3079	0.0045	22	8164	0.0027	case	0.1347
1893	RUSC1	14	3079	0.0045	22	8164	0.0027	case	0.1347
1894	CARS	14	3079	0.0045	22	8164	0.0027	case	0.1347
1895	ZNF285	14	3079	0.0045	22	8164	0.0027	case	0.1347
1896	ZNF229	14	3079	0.0045	22	8164	0.0027	case	0.1347
1897	VPS8	13	3080	0.0042	55	8131	0.0067	ctrl	0.1349
1898	HIVEP1	33	3060	0.0107	63	8123	0.0077	case	0.1352
1899	GLB1L	21	3072	0.0068	36	8150	0.0044	case	0.1353
1900	NLRP2	21	3072	0.0068	36	8150	0.0044	case	0.1353
1901	CGN	13	3080	0.0042	56	8130	0.0068	ctrl	0.1356
1902	HECW1	25	3068	0.0081	45	8141	0.0055	case	0.1384
1903	DSCAM	25	3068	0.0081	45	8141	0.0055	case	0.1384
1904	CCDC88A	8	3085	0.0026	38	8148	0.0046	ctrl	0.1386
1905	FAM160B2	8	3085	0.0026	38	8148	0.0046	ctrl	0.1386
1906	TBL3	8	3085	0.0026	38	8148	0.0046	ctrl	0.1386
1907	TEK	8	3085	0.0026	38	8148	0.0046	ctrl	0.1386
1908	DIS3L	8	3085	0.0026	39	8147	0.0048	ctrl	0.1392
1909	ARHGAP30	8	3085	0.0026	39	8147	0.0048	ctrl	0.1392
1910	BCAT2	9	3084	0.0029	12	8174	0.0015	case	0.1395
1911	MRPL4	9	3084	0.0029	12	8174	0.0015	case	0.1395
1912	GMCL1	9	3084	0.0029	12	8174	0.0015	case	0.1395
1913	B3GNT9	9	3084	0.0029	12	8174	0.0015	case	0.1395
1914	FAH	9	3084	0.0029	12	8174	0.0015	case	0.1395
1915	UAP1L1	9	3084	0.0029	12	8174	0.0015	case	0.1395
1916	GPR97	9	3084	0.0029	12	8174	0.0015	case	0.1395
1917	GYG2	9	3084	0.0029	12	8174	0.0015	case	0.1395
1918	SLC41A1	9	3084	0.0029	12	8174	0.0015	case	0.1395
1919	LBP	9	3084	0.0029	12	8174	0.0015	case	0.1395
1920	LBR	9	3084	0.0029	12	8174	0.0015	case	0.1395
1921	CTSA	9	3084	0.0029	12	8174	0.0015	case	0.1395
1922	RUNDC1	9	3084	0.0029	12	8174	0.0015	case	0.1395
1923	CNKSR3	9	3084	0.0029	12	8174	0.0015	case	0.1395
1924	TRMT12	9	3084	0.0029	12	8174	0.0015	case	0.1395
1925	STAC2	9	3084	0.0029	12	8174	0.0015	case	0.1395
1926	VANGL2	9	3084	0.0029	12	8174	0.0015	case	0.1395
1927	CATSPER4	9	3084	0.0029	12	8174	0.0015	case	0.1395
1928	ANGPT2	9	3084	0.0029	12	8174	0.0015	case	0.1395
1929	P2RX2	9	3084	0.0029	12	8174	0.0015	case	0.1395
1930	BARHL2	9	3084	0.0029	12	8174	0.0015	case	0.1395
1931	OR7G3	9	3084	0.0029	12	8174	0.0015	case	0.1395
1932	C1QTNF1	9	3084	0.0029	12	8174	0.0015	case	0.1395
1933	AMH	9	3084	0.0029	12	8174	0.0015	case	0.1395
1934	DGAT1	4	3089	0.0013	24	8162	0.0029	ctrl	0.14
1935	EXOC6	4	3089	0.0013	24	8162	0.0029	ctrl	0.14
1936	TOM1L1	4	3089	0.0013	24	8162	0.0029	ctrl	0.14
1937	LRSAM1	4	3089	0.0013	24	8162	0.0029	ctrl	0.14
1938	GOLGA5	4	3089	0.0013	24	8162	0.0029	ctrl	0.14
1939	BRSK2	4	3089	0.0013	24	8162	0.0029	ctrl	0.14
1940	LRRC8E	4	3089	0.0013	24	8162	0.0029	ctrl	0.14
1941	TRIM2	4	3089	0.0013	24	8162	0.0029	ctrl	0.14
1942	WDR76	4	3089	0.0013	24	8162	0.0029	ctrl	0.14
1943	FANCG	4	3089	0.0013	24	8162	0.0029	ctrl	0.14
1944	DCAF5	4	3089	0.0013	24	8162	0.0029	ctrl	0.14
1945	TRPV6	4	3089	0.0013	24	8162	0.0029	ctrl	0.14
1946	SP110	4	3089	0.0013	24	8162	0.0029	ctrl	0.14
1947	ZNF76	4	3089	0.0013	24	8162	0.0029	ctrl	0.14
1948	MLLT3	4	3089	0.0013	24	8162	0.0029	ctrl	0.14
1949	EEF2K	4	3089	0.0013	24	8162	0.0029	ctrl	0.14
1950	HEPH	4	3089	0.0013	24	8162	0.0029	ctrl	0.14
1951	KLHL36	4	3089	0.0013	24	8162	0.0029	ctrl	0.14
1952	MFSD10	4	3089	0.0013	24	8162	0.0029	ctrl	0.14
1953	CD209	4	3089	0.0013	24	8162	0.0029	ctrl	0.14
1954	TLE1	4	3089	0.0013	24	8162	0.0029	ctrl	0.14
1955	MARS2	4	3089	0.0013	24	8162	0.0029	ctrl	0.14
1956	SRPR	4	3089	0.0013	24	8162	0.0029	ctrl	0.14
1957	PACSIN2	4	3089	0.0013	24	8162	0.0029	ctrl	0.14
1958	NOTCH4	4	3089	0.0013	24	8162	0.0029	ctrl	0.14
1959	SETD2	34	3059	0.011	65	8121	0.0079	case	0.1406
1960	SLC12A3	21	3072	0.0068	37	8149	0.0045	case	0.1407
1961	NISCH	21	3072	0.0068	37	8149	0.0045	case	0.1407
1962	UTRN	33	3060	0.0107	118	8068	0.0144	ctrl	0.1414
1963	PIAS4	7	3086	0.0023	8	8178	0.0009773	case	0.1419
1964	PDE10A	7	3086	0.0023	8	8178	0.0009773	case	0.1419
1965	NIPA1	7	3086	0.0023	8	8178	0.0009773	case	0.1419
1966	LEPREL4	7	3086	0.0023	8	8178	0.0009773	case	0.1419
1967	RNF26	7	3086	0.0023	8	8178	0.0009773	case	0.1419
1968	PHF10	7	3086	0.0023	8	8178	0.0009773	case	0.1419
1969	FEZF2	7	3086	0.0023	8	8178	0.0009773	case	0.1419
1970	SLC25A12	7	3086	0.0023	8	8178	0.0009773	case	0.1419
1971	FAM105A	7	3086	0.0023	8	8178	0.0009773	case	0.1419
1972	RFWD2	7	3086	0.0023	8	8178	0.0009773	case	0.1419
1973	CCDC50	7	3086	0.0023	8	8178	0.0009773	case	0.1419
1974	CCDC70	7	3086	0.0023	8	8178	0.0009773	case	0.1419
1975	MRPL52	7	3086	0.0023	8	8178	0.0009773	case	0.1419
1976	MLXIPL	7	3086	0.0023	8	8178	0.0009773	case	0.1419
1977	PRSS48	7	3086	0.0023	8	8178	0.0009773	case	0.1419
1978	USP12	7	3086	0.0023	8	8178	0.0009773	case	0.1419
1979	MMP14	7	3086	0.0023	8	8178	0.0009773	case	0.1419
1980	SIAH3	7	3086	0.0023	8	8178	0.0009773	case	0.1419
1981	ENDOU	7	3086	0.0023	8	8178	0.0009773	case	0.1419
1982	KCTD21	7	3086	0.0023	8	8178	0.0009773	case	0.1419
1983	RFC5	7	3086	0.0023	8	8178	0.0009773	case	0.1419
1984	PLEKHG7	7	3086	0.0023	8	8178	0.0009773	case	0.1419
1985	MYCN	7	3086	0.0023	8	8178	0.0009773	case	0.1419
1986	TMX3	7	3086	0.0023	8	8178	0.0009773	case	0.1419
1987	B9D1	7	3086	0.0023	8	8178	0.0009773	case	0.1419
1988	SMC3	7	3086	0.0023	8	8178	0.0009773	case	0.1419
1989	EDAR	7	3086	0.0023	8	8178	0.0009773	case	0.1419
1990	OR10G8	7	3086	0.0023	8	8178	0.0009773	case	0.1419
1991	PECR	7	3086	0.0023	8	8178	0.0009773	case	0.1419
1992	C2orf78	7	3086	0.0023	8	8178	0.0009773	case	0.1419
1993	TTC4	7	3086	0.0023	8	8178	0.0009773	case	0.1419
1994	DERA	7	3086	0.0023	8	8178	0.0009773	case	0.1419
1995	DAPK2	7	3086	0.0023	8	8178	0.0009773	case	0.1419
1996	CCAR1	4	3089	0.0013	25	8161	0.0031	ctrl	0.1422
1997	CASKIN1	4	3089	0.0013	25	8161	0.0031	ctrl	0.1422
1998	AP5B1	4	3089	0.0013	25	8161	0.0031	ctrl	0.1422
[truncated: 16,654 more rows]
