# Supplementary material for: A new approach for rare variation collapsing on functional protein domains implicates specific genic regions in ALS
Source: HighWire-hosted journal article supplement (doi:10.1101/gr.243592.118), 2019-04-02
Supplement: Supplemental_Table_S10.xlsx [file Supplemental_Table_S10.xlsx]

## Sheet: SupplementaryTableS9_rareModel0
Supplementary Table S10. Genes summary Rare Model (<0.01% ExAC MAF)
Rank	Gene Name	Qualified Case	Unqualified Case	Qualified Case Freq	Qualified Ctrl	Unqualified Ctrl	Qualified Ctrl Freq	Enriched Direction	Fet P
1	SOD1	41	3052	0.0133	4	8182	0.0004886	case	3.286e-19
2	TARDBP	21	3072	0.0068	12	8174	0.0015	case	1.457e-05
3	LHX4	22	3071	0.0071	16	8170	0.002	case	7.97e-05
4	RBKS	0	3093	0	29	8157	0.0035	ctrl	0.0001878
5	ANO9	12	3081	0.0039	90	8096	0.011	ctrl	0.0001952
6	RASSF2	17	3076	0.0055	11	8175	0.0013	case	0.0003488
7	POGK	0	3093	0	26	8160	0.0032	ctrl	0.0005133
8	ALOX5	27	3066	0.0087	28	8158	0.0034	case	0.0006825
9	ARAP3	56	3037	0.0181	82	8104	0.01	case	0.0007428
10	NID2	18	3075	0.0058	106	8080	0.0129	ctrl	0.0007797
11	ACPL2	19	3074	0.0061	16	8170	0.002	case	0.0008893
12	ZNF165	19	3074	0.0061	16	8170	0.002	case	0.0008893
13	CST8	1	3092	0.0003233	30	8156	0.0037	ctrl	0.0009289
14	KIAA1919	28	3065	0.0091	30	8156	0.0037	case	0.0009338
15	NUP160	53	3040	0.0171	78	8108	0.0095	case	0.0011
16	CD300C	12	3081	0.0039	7	8179	0.0008551	case	0.0012
17	STK38L	12	3081	0.0039	7	8179	0.0008551	case	0.0012
18	BNC1	7	3086	0.0023	60	8126	0.0073	ctrl	0.0013
19	EXOC5	0	3093	0	23	8163	0.0028	ctrl	0.0014
20	MUC22	3	3090	0.0009699	40	8146	0.0049	ctrl	0.0016
21	PKNOX1	18	3075	0.0058	16	8170	0.002	case	0.0017
22	LGALSL	10	3083	0.0032	5	8181	0.0006108	case	0.0017
23	IL5	10	3083	0.0032	5	8181	0.0006108	case	0.0017
24	BMP15	17	3076	0.0055	14	8172	0.0017	case	0.0018
25	GOLGA5	5	3088	0.0016	48	8138	0.0059	ctrl	0.0019
26	GSTM3	9	3084	0.0029	4	8182	0.0004886	case	0.002
27	MAPKAPK5	0	3093	0	21	8165	0.0026	ctrl	0.0022
28	ILDR1	28	3065	0.0091	33	8153	0.004	case	0.0022
29	DYNC1H1	29	3064	0.0094	139	8047	0.017	ctrl	0.0022
30	NR2F2	6	3087	0.0019	1	8185	0.0001222	case	0.0023
31	KLF6	6	3087	0.0019	1	8185	0.0001222	case	0.0023
32	HS6ST1	8	3085	0.0026	3	8183	0.0003665	case	0.0023
33	DPP9	30	3063	0.0097	37	8149	0.0045	case	0.0023
34	FUCA1	1	3092	0.0003233	27	8159	0.0033	ctrl	0.0023
35	STS	1	3092	0.0003233	27	8159	0.0033	ctrl	0.0023
36	DAK	32	3061	0.0103	41	8145	0.005	case	0.0024
37	USP27X	7	3086	0.0023	2	8184	0.0002443	case	0.0024
38	AKR7A2	19	3074	0.0061	18	8168	0.0022	case	0.0025
39	VNN1	4	3089	0.0013	42	8144	0.0051	ctrl	0.0026
40	FAM114A2	24	3069	0.0078	27	8159	0.0033	case	0.0026
41	HMGCS2	7	3086	0.0023	56	8130	0.0068	ctrl	0.0026
42	GSPT2	13	3080	0.0042	9	8177	0.0011	case	0.0026
43	ABCG1	6	3087	0.0019	51	8135	0.0062	ctrl	0.0027
44	CD1C	6	3087	0.0019	52	8134	0.0064	ctrl	0.0027
45	KCNE2	11	3082	0.0036	7	8179	0.0008551	case	0.0028
46	USP40	46	3047	0.0149	68	8118	0.0083	case	0.0029
47	SLFNL1	23	3070	0.0074	25	8161	0.0031	case	0.003
48	METAP1D	2	3091	0.0006466	32	8154	0.0039	ctrl	0.0031
49	ZDHHC19	0	3093	0	19	8167	0.0023	ctrl	0.0034
50	RAD51	10	3083	0.0032	6	8180	0.000733	case	0.0035
51	TRAPPC1	10	3083	0.0032	6	8180	0.000733	case	0.0035
52	CCDC74B	18	3075	0.0058	17	8169	0.0021	case	0.0035
53	SLC25A25	23	3070	0.0074	26	8160	0.0032	case	0.0035
54	ECHS1	3	3090	0.0009699	36	8150	0.0044	ctrl	0.0036
55	CRYGS	1	3092	0.0003233	25	8161	0.0031	ctrl	0.0037
56	XYLB	3	3090	0.0009699	37	8149	0.0045	ctrl	0.0037
57	MROH2B	19	3074	0.0061	100	8086	0.0122	ctrl	0.0037
58	SERPINA6	21	3072	0.0068	23	8163	0.0028	case	0.0038
59	CCR8	1	3092	0.0003233	26	8160	0.0032	ctrl	0.0038
60	DLG3	12	3081	0.0039	8	8178	0.0009773	case	0.0039
61	MRGPRX2	12	3081	0.0039	8	8178	0.0009773	case	0.0039
62	GNL1	12	3081	0.0039	8	8178	0.0009773	case	0.0039
63	OR4C15	5	3088	0.0016	45	8141	0.0055	ctrl	0.0039
64	FAM189B	5	3088	0.0016	45	8141	0.0055	ctrl	0.0039
65	SPTA1	46	3047	0.0149	193	7993	0.0236	ctrl	0.0041
66	RGS9	32	3061	0.0103	43	8143	0.0053	case	0.0041
67	TBK1	30	3063	0.0097	39	8147	0.0048	case	0.0042
68	BCCIP	16	3077	0.0052	15	8171	0.0018	case	0.0042
69	PRPS1L1	16	3077	0.0052	15	8171	0.0018	case	0.0042
70	MAGEB16	9	3084	0.0029	5	8181	0.0006108	case	0.0043
71	NUP153	58	3035	0.0188	95	8091	0.0116	case	0.0045
72	ZNF599	26	3067	0.0084	32	8154	0.0039	case	0.0046
73	NSMF	2	3091	0.0006466	30	8156	0.0037	ctrl	0.0047
74	GBAS	2	3091	0.0006466	30	8156	0.0037	ctrl	0.0047
75	SSTR4	22	3071	0.0071	25	8161	0.0031	case	0.0048
76	CDH24	22	3071	0.0071	25	8161	0.0031	case	0.0048
77	KLHL18	22	3071	0.0071	25	8161	0.0031	case	0.0048
78	ZNF439	22	3071	0.0071	25	8161	0.0031	case	0.0048
79	PARD3	17	3076	0.0055	92	8094	0.0112	ctrl	0.0048
80	MPZ	12	3081	0.0039	9	8177	0.0011	case	0.0051
81	GSS	24	3069	0.0078	29	8157	0.0035	case	0.0052
82	GNA11	8	3085	0.0026	4	8182	0.0004886	case	0.0052
83	P2RX7	7	3086	0.0023	52	8134	0.0064	ctrl	0.0052
84	SYDE2	11	3082	0.0036	68	8118	0.0083	ctrl	0.0053
85	LMNA	3	3090	0.0009699	34	8152	0.0042	ctrl	0.0054
86	VSIG10L	4	3089	0.0013	39	8147	0.0048	ctrl	0.0056
87	NHLH1	4	3089	0.0013	0	8186	0	case	0.0056
88	KLRC1	4	3089	0.0013	0	8186	0	case	0.0056
89	CTAGE8	4	3089	0.0013	0	8186	0	case	0.0056
90	CXorf21	4	3089	0.0013	0	8186	0	case	0.0056
91	PLEKHG3	36	3057	0.0116	52	8134	0.0064	case	0.0057
92	RGL3	36	3057	0.0116	52	8134	0.0064	case	0.0057
93	FBLN5	0	3093	0	17	8169	0.0021	ctrl	0.0057
94	PDPK1	0	3093	0	17	8169	0.0021	ctrl	0.0057
95	SCO2	15	3078	0.0048	14	8172	0.0017	case	0.0058
96	PPAPDC2	1	3092	0.0003233	24	8162	0.0029	ctrl	0.0058
97	TMEM64	1	3092	0.0003233	24	8162	0.0029	ctrl	0.0058
98	GRM8	10	3083	0.0032	65	8121	0.0079	ctrl	0.0059
99	PTRH2	0	3093	0	18	8168	0.0022	ctrl	0.0059
100	WDR62	32	3061	0.0103	143	8043	0.0175	ctrl	0.0061
101	DARS2	25	3068	0.0081	31	8155	0.0038	case	0.0062
102	AGBL2	32	3061	0.0103	44	8142	0.0054	case	0.0063
103	SERPING1	14	3079	0.0045	12	8174	0.0015	case	0.0065
104	OLFM4	21	3072	0.0068	24	8162	0.0029	case	0.0065
105	ARHGAP21	26	3067	0.0084	122	8064	0.0149	ctrl	0.0069
106	C3orf22	6	3087	0.0019	2	8184	0.0002443	case	0.007
107	C11orf94	6	3087	0.0019	2	8184	0.0002443	case	0.007
108	C9orf89	6	3087	0.0019	2	8184	0.0002443	case	0.007
109	AGTPBP1	11	3082	0.0036	67	8119	0.0082	ctrl	0.0071
110	C6orf15	5	3088	0.0016	1	8185	0.0001222	case	0.0072
111	KLF2	5	3088	0.0016	1	8185	0.0001222	case	0.0072
112	SUMO1	5	3088	0.0016	1	8185	0.0001222	case	0.0072
113	PET112	25	3068	0.0081	32	8154	0.0039	case	0.0072
114	ZSWIM8	20	3073	0.0065	100	8086	0.0122	ctrl	0.0072
115	CA2	11	3082	0.0036	8	8178	0.0009773	case	0.0073
116	FRG1	11	3082	0.0036	8	8178	0.0009773	case	0.0073
117	RCCD1	12	3081	0.0039	10	8176	0.0012	case	0.0073
118	MMADHC	12	3081	0.0039	10	8176	0.0012	case	0.0073
119	OR13C3	12	3081	0.0039	10	8176	0.0012	case	0.0073
120	SLC25A13	7	3086	0.0023	51	8135	0.0062	ctrl	0.0074
121	NOL3	2	3091	0.0006466	29	8157	0.0035	ctrl	0.0074
122	PRELP	17	3076	0.0055	18	8168	0.0022	case	0.0074
123	TNRC6B	47	3046	0.0152	75	8111	0.0092	case	0.0077
124	ANGPT4	21	3072	0.0068	25	8161	0.0031	case	0.0077
125	PAXIP1	6	3087	0.0019	46	8140	0.0056	ctrl	0.0078
126	INPP4B	6	3087	0.0019	46	8140	0.0056	ctrl	0.0078
127	PNKP	10	3083	0.0032	62	8124	0.0076	ctrl	0.0079
128	SCIN	10	3083	0.0032	62	8124	0.0076	ctrl	0.0079
129	SLC9A3	6	3087	0.0019	47	8139	0.0057	ctrl	0.0079
130	SKI	6	3087	0.0019	47	8139	0.0057	ctrl	0.0079
131	PBXIP1	10	3083	0.0032	63	8123	0.0077	ctrl	0.0079
132	ALKBH3	3	3090	0.0009699	33	8153	0.004	ctrl	0.008
133	HSD17B13	14	3079	0.0045	13	8173	0.0016	case	0.008
134	CCDC42B	9	3084	0.0029	6	8180	0.000733	case	0.0081
135	F8	17	3076	0.0055	88	8098	0.0108	ctrl	0.0082
136	HSPA13	4	3089	0.0013	37	8149	0.0045	ctrl	0.0082
137	PSME4	17	3076	0.0055	89	8097	0.0109	ctrl	0.0083
138	SPG7	19	3074	0.0061	96	8090	0.0117	ctrl	0.0083
139	COPG1	31	3062	0.01	43	8143	0.0053	case	0.0083
140	EFCAB7	4	3089	0.0013	38	8148	0.0046	ctrl	0.0083
141	SPRY4	18	3075	0.0058	19	8167	0.0023	case	0.0084
142	HOOK1	24	3069	0.0078	30	8156	0.0037	case	0.0085
143	FAM208A	12	3081	0.0039	69	8117	0.0084	ctrl	0.0086
144	REV3L	77	3016	0.0249	139	8047	0.017	case	0.0086
145	XRN2	9	3084	0.0029	58	8128	0.0071	ctrl	0.0087
146	COL5A3	31	3062	0.01	136	8050	0.0166	ctrl	0.0087
147	FGD5	31	3062	0.01	137	8049	0.0167	ctrl	0.0087
148	GOLIM4	31	3062	0.01	44	8142	0.0054	case	0.0091
149	SLC15A2	31	3062	0.01	44	8142	0.0054	case	0.0091
150	NCKAP1L	31	3062	0.01	44	8142	0.0054	case	0.0091
151	PDLIM4	1	3092	0.0003233	22	8164	0.0027	ctrl	0.0091
152	LYPD5	1	3092	0.0003233	22	8164	0.0027	ctrl	0.0091
153	CABP4	1	3092	0.0003233	22	8164	0.0027	ctrl	0.0091
154	OR13C4	1	3092	0.0003233	22	8164	0.0027	ctrl	0.0091
155	CD3G	1	3092	0.0003233	22	8164	0.0027	ctrl	0.0091
156	DNASE2	0	3093	0	16	8170	0.002	ctrl	0.0094
157	RPLP2	0	3093	0	16	8170	0.002	ctrl	0.0094
158	TNFAIP8L2	0	3093	0	16	8170	0.002	ctrl	0.0094
159	PDCD1	0	3093	0	16	8170	0.002	ctrl	0.0094
160	HMX2	0	3093	0	16	8170	0.002	ctrl	0.0094
161	THAP10	0	3093	0	16	8170	0.002	ctrl	0.0094
162	ATP2C1	8	3085	0.0026	53	8133	0.0065	ctrl	0.0095
163	GP1BA	24	3069	0.0078	31	8155	0.0038	case	0.0096
164	CACNB3	24	3069	0.0078	31	8155	0.0038	case	0.0096
165	RRP9	1	3092	0.0003233	23	8163	0.0028	ctrl	0.0096
166	MCAT	1	3092	0.0003233	23	8163	0.0028	ctrl	0.0096
167	AKR1B15	1	3092	0.0003233	23	8163	0.0028	ctrl	0.0096
168	TEX30	1	3092	0.0003233	23	8163	0.0028	ctrl	0.0096
169	ITGB2	34	3059	0.011	50	8136	0.0061	case	0.0096
170	FLCN	11	3082	0.0036	65	8121	0.0079	ctrl	0.0096
171	MGME1	18	3075	0.0058	20	8166	0.0024	case	0.0096
172	OR51M1	18	3075	0.0058	20	8166	0.0024	case	0.0096
173	ZNF667	18	3075	0.0058	20	8166	0.0024	case	0.0096
174	ZNF404	18	3075	0.0058	20	8166	0.0024	case	0.0096
175	PARP4	52	3041	0.0168	87	8099	0.0106	case	0.0097
176	RNF152	11	3082	0.0036	9	8177	0.0011	case	0.01
177	FAM110B	11	3082	0.0036	9	8177	0.0011	case	0.01
178	AGBL4	16	3077	0.0052	17	8169	0.0021	case	0.0101
179	SMARCA2	13	3080	0.0042	72	8114	0.0088	ctrl	0.0102
180	L3MBTL4	7	3086	0.0023	49	8137	0.006	ctrl	0.0103
181	FAM24B	8	3085	0.0026	5	8181	0.0006108	case	0.0103
182	VCP	8	3085	0.0026	5	8181	0.0006108	case	0.0103
183	LILRB3	8	3085	0.0026	5	8181	0.0006108	case	0.0103
184	CALCA	8	3085	0.0026	5	8181	0.0006108	case	0.0103
185	TNXB	8	3085	0.0026	5	8181	0.0006108	case	0.0103
186	MAML2	15	3078	0.0048	79	8107	0.0097	ctrl	0.0106
187	HAUS6	15	3078	0.0048	79	8107	0.0097	ctrl	0.0106
188	NPBWR2	14	3079	0.0045	14	8172	0.0017	case	0.0106
189	C14orf37	14	3079	0.0045	14	8172	0.0017	case	0.0106
190	CCT6A	14	3079	0.0045	14	8172	0.0017	case	0.0106
191	DPAGT1	14	3079	0.0045	14	8172	0.0017	case	0.0106
192	VAMP5	10	3083	0.0032	7	8179	0.0008551	case	0.0107
193	NACA2	10	3083	0.0032	7	8179	0.0008551	case	0.0107
194	IL18	10	3083	0.0032	7	8179	0.0008551	case	0.0107
195	ANKFN1	27	3066	0.0087	37	8149	0.0045	case	0.0109
196	PAPOLA	2	3091	0.0006466	27	8159	0.0033	ctrl	0.0111
197	CCDC59	2	3091	0.0006466	27	8159	0.0033	ctrl	0.0111
198	PGLS	2	3091	0.0006466	27	8159	0.0033	ctrl	0.0111
199	B4GALT5	2	3091	0.0006466	27	8159	0.0033	ctrl	0.0111
200	LEMD3	30	3063	0.0097	42	8144	0.0051	case	0.0111
201	LRIT1	25	3068	0.0081	33	8153	0.004	case	0.0113
202	LYRM1	13	3080	0.0042	12	8174	0.0015	case	0.0113
203	TMEM86A	13	3080	0.0042	12	8174	0.0015	case	0.0113
204	TEKT5	12	3081	0.0039	68	8118	0.0083	ctrl	0.0115
205	CTNND1	12	3081	0.0039	68	8118	0.0083	ctrl	0.0115
206	CD163L1	38	3055	0.0123	59	8127	0.0072	case	0.0117
207	PSMA8	4	3089	0.0013	36	8150	0.0044	ctrl	0.012
208	DAO	3	3090	0.0009699	32	8154	0.0039	ctrl	0.0121
209	ABHD12B	3	3090	0.0009699	32	8154	0.0039	ctrl	0.0121
210	BVES	3	3090	0.0009699	32	8154	0.0039	ctrl	0.0121
211	ZNF519	25	3068	0.0081	34	8152	0.0042	case	0.0126
212	ARFGAP2	23	3070	0.0074	30	8156	0.0037	case	0.0128
213	IFITM5	7	3086	0.0023	4	8182	0.0004886	case	0.0129
214	MSX2	7	3086	0.0023	4	8182	0.0004886	case	0.0129
215	FAIM3	17	3076	0.0055	19	8167	0.0023	case	0.0134
216	SGSM2	39	3054	0.0126	62	8124	0.0076	case	0.0136
217	CORO7	39	3054	0.0126	62	8124	0.0076	case	0.0136
218	SLC10A2	28	3065	0.0091	40	8146	0.0049	case	0.0138
219	PACS2	28	3065	0.0091	40	8146	0.0049	case	0.0138
220	ADTRP	10	3083	0.0032	8	8178	0.0009773	case	0.014
221	COMMD7	10	3083	0.0032	8	8178	0.0009773	case	0.014
222	ARMC2	34	3059	0.011	51	8135	0.0062	case	0.014
223	ELK4	15	3078	0.0048	16	8170	0.002	case	0.014
224	WDR87	44	3049	0.0142	174	8012	0.0213	ctrl	0.0142
225	FAM46B	13	3080	0.0042	13	8173	0.0016	case	0.0144
226	C17orf74	13	3080	0.0042	13	8173	0.0016	case	0.0144
227	ZCCHC9	13	3080	0.0042	13	8173	0.0016	case	0.0144
228	SLC26A5	7	3086	0.0023	48	8138	0.0059	ctrl	0.0144
229	SLC15A3	7	3086	0.0023	48	8138	0.0059	ctrl	0.0144
230	RPA1	7	3086	0.0023	48	8138	0.0059	ctrl	0.0144
231	DGKH	31	3062	0.01	46	8140	0.0056	case	0.0145
232	LHX2	1	3092	0.0003233	21	8165	0.0026	ctrl	0.0145
233	CUL5	1	3092	0.0003233	21	8165	0.0026	ctrl	0.0145
234	TAF7L	1	3092	0.0003233	21	8165	0.0026	ctrl	0.0145
235	OR6K2	1	3092	0.0003233	21	8165	0.0026	ctrl	0.0145
236	AADACL4	21	3072	0.0068	27	8159	0.0033	case	0.0146
237	KCNH6	40	3053	0.0129	64	8122	0.0078	case	0.0147
238	OBSCN	265	2828	0.0857	588	7598	0.0718	case	0.0148
239	ARHGAP31	37	3056	0.012	58	8128	0.0071	case	0.0149
240	ZNF681	24	3069	0.0078	32	8154	0.0039	case	0.0152
241	ACOT11	12	3081	0.0039	67	8119	0.0082	ctrl	0.0155
242	DTL	6	3087	0.0019	43	8143	0.0053	ctrl	0.0155
243	TLR6	6	3087	0.0019	43	8143	0.0053	ctrl	0.0155
244	PPP2R5E	0	3093	0	14	8172	0.0017	ctrl	0.0155
245	TMED10	0	3093	0	14	8172	0.0017	ctrl	0.0155
246	XKR6	0	3093	0	14	8172	0.0017	ctrl	0.0155
247	MUM1L1	0	3093	0	14	8172	0.0017	ctrl	0.0155
248	BCL2L15	0	3093	0	14	8172	0.0017	ctrl	0.0155
249	DCAF8	17	3076	0.0055	20	8166	0.0024	case	0.0157
250	CHD3	14	3079	0.0045	74	8112	0.009	ctrl	0.0158
251	SALL2	14	3079	0.0045	74	8112	0.009	ctrl	0.0158
252	LGALS2	6	3087	0.0019	3	8183	0.0003665	case	0.016
253	ADM5	6	3087	0.0019	3	8183	0.0003665	case	0.016
254	ATOH8	6	3087	0.0019	3	8183	0.0003665	case	0.016
255	ATIC	26	3067	0.0084	37	8149	0.0045	case	0.0161
256	CYP4F12	9	3084	0.0029	55	8131	0.0067	ctrl	0.0162
257	MBD3	0	3093	0	15	8171	0.0018	ctrl	0.0163
258	ACOT2	0	3093	0	15	8171	0.0018	ctrl	0.0163
259	EIF4E2	0	3093	0	15	8171	0.0018	ctrl	0.0163
260	ELAVL1	0	3093	0	15	8171	0.0018	ctrl	0.0163
261	EXOSC4	0	3093	0	15	8171	0.0018	ctrl	0.0163
262	TPMT	0	3093	0	15	8171	0.0018	ctrl	0.0163
263	PRTFDC1	0	3093	0	15	8171	0.0018	ctrl	0.0163
264	TRMT61A	12	3081	0.0039	11	8175	0.0013	case	0.0163
265	SMAD1	12	3081	0.0039	11	8175	0.0013	case	0.0163
266	UCK1	12	3081	0.0039	11	8175	0.0013	case	0.0163
267	STK3	12	3081	0.0039	11	8175	0.0013	case	0.0163
268	INPP5F	35	3058	0.0113	54	8132	0.0066	case	0.0164
269	FBXO30	5	3088	0.0016	38	8148	0.0046	ctrl	0.0167
270	GLS2	5	3088	0.0016	38	8148	0.0046	ctrl	0.0167
271	SLC1A2	5	3088	0.0016	38	8148	0.0046	ctrl	0.0167
272	SEL1L	5	3088	0.0016	39	8147	0.0048	ctrl	0.0167
273	TMEM145	5	3088	0.0016	39	8147	0.0048	ctrl	0.0167
274	FBXL22	2	3091	0.0006466	25	8161	0.0031	ctrl	0.0167
275	TCAP	2	3091	0.0006466	25	8161	0.0031	ctrl	0.0167
276	ZBED2	2	3091	0.0006466	25	8161	0.0031	ctrl	0.0167
277	ARHGEF39	2	3091	0.0006466	25	8161	0.0031	ctrl	0.0167
278	LDLRAD4	2	3091	0.0006466	25	8161	0.0031	ctrl	0.0167
279	WNK4	21	3072	0.0068	97	8089	0.0118	ctrl	0.017
280	CSGALNACT2	22	3071	0.0071	29	8157	0.0035	case	0.0172
281	RTCA	4	3089	0.0013	34	8152	0.0042	ctrl	0.0173
282	ATP8A1	11	3082	0.0036	62	8124	0.0076	ctrl	0.0173
283	MAP3K4	11	3082	0.0036	62	8124	0.0076	ctrl	0.0173
284	VSIG8	2	3091	0.0006466	26	8160	0.0032	ctrl	0.0174
285	SHB	2	3091	0.0006466	26	8160	0.0032	ctrl	0.0174
286	MAGEC2	2	3091	0.0006466	26	8160	0.0032	ctrl	0.0174
287	MGAT4C	2	3091	0.0006466	26	8160	0.0032	ctrl	0.0174
288	ZNF92	15	3078	0.0048	17	8169	0.0021	case	0.0174
289	NDRG4	15	3078	0.0048	17	8169	0.0021	case	0.0174
290	PLD1	48	3045	0.0155	82	8104	0.01	case	0.0174
291	ASIC3	35	3058	0.0113	55	8131	0.0067	case	0.0174
292	TRAF3IP2	20	3073	0.0065	25	8161	0.0031	case	0.0176
293	MAP3K10	20	3073	0.0065	25	8161	0.0031	case	0.0176
294	IDE	30	3063	0.0097	44	8142	0.0054	case	0.0178
295	SYK	4	3089	0.0013	35	8151	0.0043	ctrl	0.0178
296	ZNF799	4	3089	0.0013	35	8151	0.0043	ctrl	0.0178
297	AP3B1	8	3085	0.0026	50	8136	0.0061	ctrl	0.0179
298	SLC39A12	8	3085	0.0026	50	8136	0.0061	ctrl	0.0179
299	UNC13A	17	3076	0.0055	84	8102	0.0103	ctrl	0.0181
300	PINK1	8	3085	0.0026	51	8135	0.0062	ctrl	0.0182
301	AOC2	39	3054	0.0126	63	8123	0.0077	case	0.0187
302	TRIP11	22	3071	0.0071	100	8086	0.0122	ctrl	0.0187
303	TRIM22	16	3077	0.0052	18	8168	0.0022	case	0.0188
304	SLC1A3	16	3077	0.0052	18	8168	0.0022	case	0.0188
305	MYO1A	42	3051	0.0136	70	8116	0.0086	case	0.0191
306	CORO7-PAM16	42	3051	0.0136	70	8116	0.0086	case	0.0191
307	FAM83B	25	3068	0.0081	35	8151	0.0043	case	0.0193
308	FAM19A1	5	3088	0.0016	2	8184	0.0002443	case	0.0194
309	PDZK1	5	3088	0.0016	2	8184	0.0002443	case	0.0194
310	C19orf35	5	3088	0.0016	2	8184	0.0002443	case	0.0194
311	MLLT4	20	3073	0.0065	93	8093	0.0114	ctrl	0.0195
312	G6PC	18	3075	0.0058	22	8164	0.0027	case	0.0195
313	TNKS2	10	3083	0.0032	57	8129	0.007	ctrl	0.0195
314	UVRAG	20	3073	0.0065	26	8160	0.0032	case	0.0196
315	SLA	10	3083	0.0032	9	8177	0.0011	case	0.0196
316	MSL3	10	3083	0.0032	9	8177	0.0011	case	0.0196
317	GTF2B	10	3083	0.0032	9	8177	0.0011	case	0.0196
318	MXD1	10	3083	0.0032	9	8177	0.0011	case	0.0196
319	RFPL3	14	3079	0.0045	15	8171	0.0018	case	0.0196
320	ICAM3	7	3086	0.0023	46	8140	0.0056	ctrl	0.0198
321	CTSB	7	3086	0.0023	46	8140	0.0056	ctrl	0.0198
322	STAT6	7	3086	0.0023	46	8140	0.0056	ctrl	0.0198
323	CRLF3	12	3081	0.0039	12	8174	0.0015	case	0.02
324	LZTFL1	12	3081	0.0039	12	8174	0.0015	case	0.02
325	DNAJA2	9	3084	0.0029	7	8179	0.0008551	case	0.02
326	CDK16	9	3084	0.0029	7	8179	0.0008551	case	0.02
327	OLIG3	9	3084	0.0029	7	8179	0.0008551	case	0.02
328	COMMD1	9	3084	0.0029	7	8179	0.0008551	case	0.02
329	INSL5	9	3084	0.0029	7	8179	0.0008551	case	0.02
330	MYO5C	28	3065	0.0091	120	8066	0.0147	ctrl	0.0201
331	ZNF862	36	3057	0.0116	58	8128	0.0071	case	0.0203
332	SNX19	12	3081	0.0039	64	8122	0.0078	ctrl	0.0203
333	MUC5B	121	2972	0.0391	247	7939	0.0302	case	0.0204
334	ZSCAN20	12	3081	0.0039	65	8121	0.0079	ctrl	0.0204
335	HEATR1	34	3059	0.011	140	8046	0.0171	ctrl	0.0204
336	CFTR	44	3049	0.0142	171	8015	0.0209	ctrl	0.0205
337	RFPL4AL1	3	3090	0.0009699	0	8186	0	case	0.0206
338	C11orf86	3	3090	0.0009699	0	8186	0	case	0.0206
339	C11orf73	3	3090	0.0009699	0	8186	0	case	0.0206
340	RAP1B	3	3090	0.0009699	0	8186	0	case	0.0206
341	PPP1R14C	3	3090	0.0009699	0	8186	0	case	0.0206
342	UBE2N	3	3090	0.0009699	0	8186	0	case	0.0206
343	METTL4	25	3068	0.0081	36	8150	0.0044	case	0.0211
344	SPTBN1	26	3067	0.0084	112	8074	0.0137	ctrl	0.0213
345	PDE10A	16	3077	0.0052	19	8167	0.0023	case	0.0215
346	RCBTB1	6	3087	0.0019	41	8145	0.005	ctrl	0.0217
347	FSD2	9	3084	0.0029	53	8133	0.0065	ctrl	0.0219
348	C3orf58	4	3089	0.0013	1	8185	0.0001222	case	0.022
349	CDC42	4	3089	0.0013	1	8185	0.0001222	case	0.022
350	PSMC5	4	3089	0.0013	1	8185	0.0001222	case	0.022
351	NDUFB3	4	3089	0.0013	1	8185	0.0001222	case	0.022
352	ETV4	23	3070	0.0074	32	8154	0.0039	case	0.0222
353	ZC3H18	34	3059	0.011	54	8132	0.0066	case	0.0222
354	ATF7IP	31	3062	0.01	48	8138	0.0059	case	0.0223
355	TLE6	31	3062	0.01	48	8138	0.0059	case	0.0223
356	SCRN1	18	3075	0.0058	23	8163	0.0028	case	0.0224
357	XRCC3	18	3075	0.0058	23	8163	0.0028	case	0.0224
358	OR5P2	18	3075	0.0058	23	8163	0.0028	case	0.0224
359	LPO	9	3084	0.0029	54	8132	0.0066	ctrl	0.0224
360	APOPT1	1	3092	0.0003233	19	8167	0.0023	ctrl	0.0224
361	POP5	1	3092	0.0003233	19	8167	0.0023	ctrl	0.0224
362	PRR4	1	3092	0.0003233	19	8167	0.0023	ctrl	0.0224
363	FABP12	1	3092	0.0003233	19	8167	0.0023	ctrl	0.0224
364	CADM2	1	3092	0.0003233	19	8167	0.0023	ctrl	0.0224
365	PNPLA4	1	3092	0.0003233	19	8167	0.0023	ctrl	0.0224
366	ZNF728	1	3092	0.0003233	19	8167	0.0023	ctrl	0.0224
367	LSMEM2	1	3092	0.0003233	19	8167	0.0023	ctrl	0.0224
368	ZNF335	55	3038	0.0178	99	8087	0.0121	case	0.0229
369	MMP14	21	3072	0.0068	28	8158	0.0034	case	0.0233
370	PROM2	11	3082	0.0036	61	8125	0.0075	ctrl	0.0233
371	ANKMY2	5	3088	0.0016	37	8149	0.0045	ctrl	0.0235
372	FSD1L	5	3088	0.0016	37	8149	0.0045	ctrl	0.0235
373	XPO7	5	3088	0.0016	37	8149	0.0045	ctrl	0.0235
374	ANGPTL1	5	3088	0.0016	37	8149	0.0045	ctrl	0.0235
375	ABCA5	22	3071	0.0071	99	8087	0.0121	ctrl	0.0237
376	GPR173	7	3086	0.0023	5	8181	0.0006108	case	0.0238
377	CPXCR1	7	3086	0.0023	5	8181	0.0006108	case	0.0238
378	C2orf57	7	3086	0.0023	5	8181	0.0006108	case	0.0238
379	GADD45A	7	3086	0.0023	5	8181	0.0006108	case	0.0238
380	IDS	1	3092	0.0003233	20	8166	0.0024	ctrl	0.0239
381	RRAGC	1	3092	0.0003233	20	8166	0.0024	ctrl	0.0239
382	MRPL9	19	3074	0.0061	24	8162	0.0029	case	0.0243
383	HCLS1	19	3074	0.0061	24	8162	0.0029	case	0.0243
384	EFCAB4B	29	3064	0.0094	44	8142	0.0054	case	0.0244
385	GNPAT	8	3085	0.0026	49	8137	0.006	ctrl	0.0246
386	TCEB3	8	3085	0.0026	49	8137	0.006	ctrl	0.0246
387	USP44	8	3085	0.0026	49	8137	0.006	ctrl	0.0246
388	DTNBP1	8	3085	0.0026	49	8137	0.006	ctrl	0.0246
389	FUBP1	4	3089	0.0013	32	8154	0.0039	ctrl	0.025
390	PAQR5	4	3089	0.0013	32	8154	0.0039	ctrl	0.025
391	LMBRD2	4	3089	0.0013	32	8154	0.0039	ctrl	0.025
392	BCL6B	4	3089	0.0013	32	8154	0.0039	ctrl	0.025
393	PRKAR2A	4	3089	0.0013	33	8153	0.004	ctrl	0.0252
394	VPS37C	2	3091	0.0006466	23	8163	0.0028	ctrl	0.0254
395	TTC39A	2	3091	0.0006466	23	8163	0.0028	ctrl	0.0254
396	C6orf132	2	3091	0.0006466	23	8163	0.0028	ctrl	0.0254
397	DNAJC3	2	3091	0.0006466	23	8163	0.0028	ctrl	0.0254
398	MRGPRX1	2	3091	0.0006466	23	8163	0.0028	ctrl	0.0254
399	CST4	2	3091	0.0006466	23	8163	0.0028	ctrl	0.0254
400	GAS2	2	3091	0.0006466	23	8163	0.0028	ctrl	0.0254
401	TSPAN18	2	3091	0.0006466	23	8163	0.0028	ctrl	0.0254
402	GPR4	2	3091	0.0006466	23	8163	0.0028	ctrl	0.0254
403	KCNK6	2	3091	0.0006466	24	8162	0.0029	ctrl	0.0255
404	AGO3	2	3091	0.0006466	24	8162	0.0029	ctrl	0.0255
405	KLRK1	2	3091	0.0006466	24	8162	0.0029	ctrl	0.0255
406	HFE2	2	3091	0.0006466	24	8162	0.0029	ctrl	0.0255
407	SGTA	2	3091	0.0006466	24	8162	0.0029	ctrl	0.0255
408	LUZP4	2	3091	0.0006466	24	8162	0.0029	ctrl	0.0255
409	ZNF71	24	3069	0.0078	34	8152	0.0042	case	0.0256
410	PPP1R3A	21	3072	0.0068	29	8157	0.0035	case	0.0257
411	AMIGO2	21	3072	0.0068	29	8157	0.0035	case	0.0257
412	GDA	3	3090	0.0009699	28	8158	0.0034	ctrl	0.0257
413	EPYC	3	3090	0.0009699	28	8158	0.0034	ctrl	0.0257
414	ACADSB	3	3090	0.0009699	28	8158	0.0034	ctrl	0.0257
415	TRIM52	3	3090	0.0009699	28	8158	0.0034	ctrl	0.0257
416	SNX5	3	3090	0.0009699	28	8158	0.0034	ctrl	0.0257
417	MYOG	0	3093	0	13	8173	0.0016	ctrl	0.0257
418	SLC24A4	26	3067	0.0084	39	8147	0.0048	case	0.0259
419	KLC4	26	3067	0.0084	39	8147	0.0048	case	0.0259
420	RGS22	23	3070	0.0074	102	8084	0.0125	ctrl	0.026
421	TTLL9	10	3083	0.0032	56	8130	0.0068	ctrl	0.0261
422	KAZN	10	3083	0.0032	56	8130	0.0068	ctrl	0.0261
423	DFNA5	10	3083	0.0032	56	8130	0.0068	ctrl	0.0261
424	SEMA3E	29	3064	0.0094	45	8141	0.0055	case	0.0263
425	HK2	16	3077	0.0052	77	8109	0.0094	ctrl	0.0263
426	C16orf62	19	3074	0.0061	25	8161	0.0031	case	0.0264
427	QRICH2	29	3064	0.0094	120	8066	0.0147	ctrl	0.0267
428	HTRA4	3	3090	0.0009699	29	8157	0.0035	ctrl	0.0267
429	LSP1	3	3090	0.0009699	29	8157	0.0035	ctrl	0.0267
430	UPP1	3	3090	0.0009699	29	8157	0.0035	ctrl	0.0267
431	TRAF6	3	3090	0.0009699	29	8157	0.0035	ctrl	0.0267
432	NEK1	46	3047	0.0149	80	8106	0.0098	case	0.0267
433	UBR5	50	3043	0.0162	88	8098	0.0108	case	0.0267
434	ST5	12	3081	0.0039	63	8123	0.0077	ctrl	0.0267
435	UBR3	14	3079	0.0045	70	8116	0.0086	ctrl	0.0268
436	ZNF709	17	3076	0.0055	21	8165	0.0026	case	0.0268
437	MLH1	27	3066	0.0087	40	8146	0.0049	case	0.0269
438	SLC35D3	9	3084	0.0029	8	8178	0.0009773	case	0.027
439	MORF4L1	9	3084	0.0029	8	8178	0.0009773	case	0.027
440	CXorf30	9	3084	0.0029	8	8178	0.0009773	case	0.027
441	SLC10A1	7	3086	0.0023	44	8142	0.0054	ctrl	0.0273
442	SCAND3	7	3086	0.0023	44	8142	0.0054	ctrl	0.0273
443	ZBP1	7	3086	0.0023	44	8142	0.0054	ctrl	0.0273
444	PCDHA3	30	3063	0.0097	46	8140	0.0056	case	0.0273
445	SLC26A10	7	3086	0.0023	45	8141	0.0055	ctrl	0.0278
446	LMOD3	7	3086	0.0023	45	8141	0.0055	ctrl	0.0278
447	CCDC65	7	3086	0.0023	45	8141	0.0055	ctrl	0.0278
448	SIRPB1	7	3086	0.0023	45	8141	0.0055	ctrl	0.0278
449	OOEP	13	3080	0.0042	14	8172	0.0017	case	0.0278
450	C14orf159	13	3080	0.0042	14	8172	0.0017	case	0.0278
451	HTR6	11	3082	0.0036	11	8175	0.0013	case	0.0281
452	HSPB2	11	3082	0.0036	11	8175	0.0013	case	0.0281
453	COMMD2	11	3082	0.0036	11	8175	0.0013	case	0.0281
454	MBD3L1	11	3082	0.0036	11	8175	0.0013	case	0.0281
455	GTPBP4	27	3066	0.0087	41	8145	0.005	case	0.0285
456	ABL2	36	3057	0.0116	60	8126	0.0073	case	0.0292
457	PTPRG	47	3046	0.0152	83	8103	0.0101	case	0.0293
458	RBM3	8	3085	0.0026	6	8180	0.000733	case	0.0295
459	IL34	8	3085	0.0026	6	8180	0.000733	case	0.0295
460	PTPMT1	8	3085	0.0026	6	8180	0.000733	case	0.0295
461	FBXO33	15	3078	0.0048	18	8168	0.0022	case	0.0296
462	LGALS12	15	3078	0.0048	18	8168	0.0022	case	0.0296
463	WNK1	22	3071	0.0071	97	8089	0.0118	ctrl	0.0296
464	ZFAT	40	3053	0.0129	68	8118	0.0083	case	0.0297
465	PCDHAC1	9	3084	0.0029	52	8134	0.0064	ctrl	0.0298
466	HIF3A	9	3084	0.0029	52	8134	0.0064	ctrl	0.0298
467	FAM171A1	9	3084	0.0029	52	8134	0.0064	ctrl	0.0298
468	COL25A1	19	3074	0.0061	26	8160	0.0032	case	0.0299
469	UBASH3B	19	3074	0.0061	26	8160	0.0032	case	0.0299
470	PCSK7	17	3076	0.0055	22	8164	0.0027	case	0.0301
471	WDR86	17	3076	0.0055	22	8164	0.0027	case	0.0301
472	TMEM25	17	3076	0.0055	22	8164	0.0027	case	0.0301
473	OPN1SW	17	3076	0.0055	22	8164	0.0027	case	0.0301
474	RALBP1	17	3076	0.0055	22	8164	0.0027	case	0.0301
475	FMOD	17	3076	0.0055	22	8164	0.0027	case	0.0301
476	TRMT13	6	3087	0.0019	40	8146	0.0049	ctrl	0.0303
477	METTL18	6	3087	0.0019	40	8146	0.0049	ctrl	0.0303
478	BRDT	11	3082	0.0036	58	8128	0.0071	ctrl	0.0305
479	PCDHB4	11	3082	0.0036	58	8128	0.0071	ctrl	0.0305
480	DHX38	13	3080	0.0042	65	8121	0.0079	ctrl	0.0307
481	PLEKHM2	13	3080	0.0042	65	8121	0.0079	ctrl	0.0307
482	ANO5	13	3080	0.0042	66	8120	0.0081	ctrl	0.0307
483	SMPD1	13	3080	0.0042	66	8120	0.0081	ctrl	0.0307
484	HBZ	6	3087	0.0019	4	8182	0.0004886	case	0.0309
485	S100A11	6	3087	0.0019	4	8182	0.0004886	case	0.0309
486	ZNF69	6	3087	0.0019	4	8182	0.0004886	case	0.0309
487	RRAS2	6	3087	0.0019	4	8182	0.0004886	case	0.0309
488	TUBA4A	6	3087	0.0019	4	8182	0.0004886	case	0.0309
489	C2orf53	6	3087	0.0019	4	8182	0.0004886	case	0.0309
490	LCE3D	6	3087	0.0019	4	8182	0.0004886	case	0.0309
491	CECR5	25	3068	0.0081	37	8149	0.0045	case	0.0311
492	PTGFRN	25	3068	0.0081	37	8149	0.0045	case	0.0311
493	RTTN	38	3055	0.0123	148	8038	0.0181	ctrl	0.0311
494	SETD1A	37	3056	0.012	62	8124	0.0076	case	0.0311
495	MIER2	22	3071	0.0071	32	8154	0.0039	case	0.0324
496	FOCAD	52	3041	0.0168	95	8091	0.0116	case	0.0324
497	C7orf31	13	3080	0.0042	15	8171	0.0018	case	0.0325
498	ZNF226	18	3075	0.0058	83	8103	0.0101	ctrl	0.0327
499	ATP9B	26	3067	0.0084	110	8076	0.0134	ctrl	0.0329
500	ASTN2	41	3052	0.0133	71	8115	0.0087	case	0.033
501	CHRNB1	5	3088	0.0016	35	8151	0.0043	ctrl	0.0331
502	MORN1	8	3085	0.0026	47	8139	0.0057	ctrl	0.0332
503	DCHS1	51	3042	0.0165	188	7998	0.023	ctrl	0.0335
504	TKT	25	3068	0.0081	38	8148	0.0046	case	0.0335
505	RINT1	25	3068	0.0081	38	8148	0.0046	case	0.0335
506	DHDH	5	3088	0.0016	36	8150	0.0044	ctrl	0.0336
507	PFKFB3	5	3088	0.0016	36	8150	0.0044	ctrl	0.0336
508	TMEM135	5	3088	0.0016	36	8150	0.0044	ctrl	0.0336
509	HOXA1	5	3088	0.0016	36	8150	0.0044	ctrl	0.0336
510	GPN1	5	3088	0.0016	36	8150	0.0044	ctrl	0.0336
511	SETD2	53	3040	0.0171	97	8089	0.0118	case	0.0338
512	HPR	20	3073	0.0065	28	8158	0.0034	case	0.0341
513	SPINT1	20	3073	0.0065	28	8158	0.0034	case	0.0341
514	BRE	15	3078	0.0048	19	8167	0.0023	case	0.0344
515	ANKRA2	15	3078	0.0048	19	8167	0.0023	case	0.0344
516	NIT1	15	3078	0.0048	19	8167	0.0023	case	0.0344
517	GPR68	15	3078	0.0048	19	8167	0.0023	case	0.0344
518	ERGIC3	15	3078	0.0048	19	8167	0.0023	case	0.0344
519	ASB5	15	3078	0.0048	19	8167	0.0023	case	0.0344
520	SGCZ	15	3078	0.0048	19	8167	0.0023	case	0.0344
521	PSAP	10	3083	0.0032	54	8132	0.0066	ctrl	0.0347
522	ANKRD17	24	3069	0.0078	102	8084	0.0125	ctrl	0.0348
523	AP4E1	14	3079	0.0045	69	8117	0.0084	ctrl	0.0349
524	ZNF528	12	3081	0.0039	61	8125	0.0075	ctrl	0.035
525	MSRB1	1	3092	0.0003233	17	8169	0.0021	ctrl	0.0351
526	SYCP3	1	3092	0.0003233	17	8169	0.0021	ctrl	0.0351
527	IGLL1	1	3092	0.0003233	17	8169	0.0021	ctrl	0.0351
528	CST9L	1	3092	0.0003233	17	8169	0.0021	ctrl	0.0351
529	AMN1	1	3092	0.0003233	17	8169	0.0021	ctrl	0.0351
530	DNAJB11	1	3092	0.0003233	17	8169	0.0021	ctrl	0.0351
531	GATC	1	3092	0.0003233	17	8169	0.0021	ctrl	0.0351
532	TMEM230	1	3092	0.0003233	17	8169	0.0021	ctrl	0.0351
533	FAM218A	1	3092	0.0003233	17	8169	0.0021	ctrl	0.0351
534	GLUD2	1	3092	0.0003233	17	8169	0.0021	ctrl	0.0351
535	SOST	1	3092	0.0003233	17	8169	0.0021	ctrl	0.0351
536	RND1	1	3092	0.0003233	17	8169	0.0021	ctrl	0.0351
537	NDUFB5	1	3092	0.0003233	17	8169	0.0021	ctrl	0.0351
538	SNAI3	11	3082	0.0036	12	8174	0.0015	case	0.0353
539	ZDHHC18	11	3082	0.0036	12	8174	0.0015	case	0.0353
540	HEPACAM	11	3082	0.0036	12	8174	0.0015	case	0.0353
541	C1QA	11	3082	0.0036	12	8174	0.0015	case	0.0353
542	VEGFA	11	3082	0.0036	12	8174	0.0015	case	0.0353
543	DAPK3	11	3082	0.0036	12	8174	0.0015	case	0.0353
544	GP6	10	3083	0.0032	55	8131	0.0067	ctrl	0.0353
545	POR	12	3081	0.0039	62	8124	0.0076	ctrl	0.0355
546	SLC7A13	4	3089	0.0013	31	8155	0.0038	ctrl	0.0357
547	CYB561D2	4	3089	0.0013	31	8155	0.0038	ctrl	0.0357
548	ADAP2	4	3089	0.0013	31	8155	0.0038	ctrl	0.0357
549	IL18R1	18	3075	0.0058	24	8162	0.0029	case	0.0358
550	CAP2	18	3075	0.0058	24	8162	0.0029	case	0.0358
551	HS3ST6	1	3092	0.0003233	18	8168	0.0022	ctrl	0.0358
552	GAL3ST3	1	3092	0.0003233	18	8168	0.0022	ctrl	0.0358
553	TMED3	1	3092	0.0003233	18	8168	0.0022	ctrl	0.0358
554	TAS2R20	1	3092	0.0003233	18	8168	0.0022	ctrl	0.0358
555	RCN1	1	3092	0.0003233	18	8168	0.0022	ctrl	0.0358
556	LRRC56	26	3067	0.0084	40	8146	0.0049	case	0.037
557	IPO11	26	3067	0.0084	40	8146	0.0049	case	0.037
558	SMARCA1	16	3077	0.0052	20	8166	0.0024	case	0.0372
559	ERRFI1	16	3077	0.0052	20	8166	0.0024	case	0.0372
560	ERCC5	22	3071	0.0071	96	8090	0.0117	ctrl	0.0374
561	TOPAZ1	46	3047	0.0149	83	8103	0.0101	case	0.0374
562	CNTNAP2	46	3047	0.0149	83	8103	0.0101	case	0.0374
563	ARHGAP22	7	3086	0.0023	42	8144	0.0051	ctrl	0.0374
564	FAM71B	7	3086	0.0023	42	8144	0.0051	ctrl	0.0374
565	MGAT4B	7	3086	0.0023	42	8144	0.0051	ctrl	0.0374
566	DIS3L	17	3076	0.0055	78	8108	0.0095	ctrl	0.0374
567	GSTO2	3	3090	0.0009699	26	8160	0.0032	ctrl	0.0377
568	GC	3	3090	0.0009699	26	8160	0.0032	ctrl	0.0377
569	YIPF1	3	3090	0.0009699	26	8160	0.0032	ctrl	0.0377
570	RNF130	3	3090	0.0009699	26	8160	0.0032	ctrl	0.0377
571	TEAD2	3	3090	0.0009699	26	8160	0.0032	ctrl	0.0377
572	PILRA	3	3090	0.0009699	26	8160	0.0032	ctrl	0.0377
573	NPFFR1	3	3090	0.0009699	26	8160	0.0032	ctrl	0.0377
574	LARP6	3	3090	0.0009699	26	8160	0.0032	ctrl	0.0377
575	TAS2R42	3	3090	0.0009699	26	8160	0.0032	ctrl	0.0377
576	TAF1D	3	3090	0.0009699	26	8160	0.0032	ctrl	0.0377
577	CGRRF1	3	3090	0.0009699	26	8160	0.0032	ctrl	0.0377
578	ZCCHC12	3	3090	0.0009699	26	8160	0.0032	ctrl	0.0377
579	GLTSCR1	2	3091	0.0006466	22	8164	0.0027	ctrl	0.0379
580	RSG1	2	3091	0.0006466	22	8164	0.0027	ctrl	0.0379
581	RAD21	2	3091	0.0006466	22	8164	0.0027	ctrl	0.0379
582	SRPK3	2	3091	0.0006466	22	8164	0.0027	ctrl	0.0379
583	SPESP1	2	3091	0.0006466	22	8164	0.0027	ctrl	0.0379
584	GALNT13	2	3091	0.0006466	22	8164	0.0027	ctrl	0.0379
585	BBOX1	2	3091	0.0006466	22	8164	0.0027	ctrl	0.0379
586	SUPT16H	2	3091	0.0006466	22	8164	0.0027	ctrl	0.0379
587	NCR2	2	3091	0.0006466	22	8164	0.0027	ctrl	0.0379
588	AQP12B	2	3091	0.0006466	22	8164	0.0027	ctrl	0.0379
589	TGFBR2	2	3091	0.0006466	22	8164	0.0027	ctrl	0.0379
590	MYH7B	42	3051	0.0136	159	8027	0.0194	ctrl	0.0379
591	CRIP2	8	3085	0.0026	7	8179	0.0008551	case	0.038
592	MRGPRE	8	3085	0.0026	7	8179	0.0008551	case	0.038
593	KRTAP24-1	8	3085	0.0026	7	8179	0.0008551	case	0.038
594	MPST	8	3085	0.0026	7	8179	0.0008551	case	0.038
595	RNASE1	8	3085	0.0026	7	8179	0.0008551	case	0.038
596	KPNB1	8	3085	0.0026	7	8179	0.0008551	case	0.038
597	ST3GAL5	3	3090	0.0009699	27	8159	0.0033	ctrl	0.0381
598	MRPL1	3	3090	0.0009699	27	8159	0.0033	ctrl	0.0381
599	CAMK2B	3	3090	0.0009699	27	8159	0.0033	ctrl	0.0381
600	HSD3B7	3	3090	0.0009699	27	8159	0.0033	ctrl	0.0381
601	TNFAIP1	3	3090	0.0009699	27	8159	0.0033	ctrl	0.0381
602	SLCO2B1	29	3064	0.0094	47	8139	0.0057	case	0.0392
603	UBN1	15	3078	0.0048	72	8114	0.0088	ctrl	0.0394
604	DDX59	9	3084	0.0029	50	8136	0.0061	ctrl	0.0396
605	LMF1	23	3070	0.0074	35	8151	0.0043	case	0.0396
606	RRNAD1	23	3070	0.0074	35	8151	0.0043	case	0.0396
607	CDK5RAP2	32	3061	0.0103	128	8058	0.0156	ctrl	0.0396
608	PHKB	32	3061	0.0103	128	8058	0.0156	ctrl	0.0396
609	ZNF577	18	3075	0.0058	25	8161	0.0031	case	0.0397
610	FADS6	12	3081	0.0039	13	8173	0.0016	case	0.0399
611	C3orf30	12	3081	0.0039	13	8173	0.0016	case	0.0399
612	MDM4	12	3081	0.0039	13	8173	0.0016	case	0.0399
613	KRTAP12-2	12	3081	0.0039	13	8173	0.0016	case	0.0399
614	EPSTI1	12	3081	0.0039	13	8173	0.0016	case	0.0399
615	RAE1	12	3081	0.0039	13	8173	0.0016	case	0.0399
616	HNRNPM	12	3081	0.0039	13	8173	0.0016	case	0.0399
617	KCNG2	5	3088	0.0016	3	8183	0.0003665	case	0.0401
618	CLVS2	5	3088	0.0016	3	8183	0.0003665	case	0.0401
619	NUPR1	5	3088	0.0016	3	8183	0.0003665	case	0.0401
620	UBE2R2	5	3088	0.0016	3	8183	0.0003665	case	0.0401
621	RPS11	5	3088	0.0016	3	8183	0.0003665	case	0.0401
622	KRTDAP	5	3088	0.0016	3	8183	0.0003665	case	0.0401
623	RNF217	5	3088	0.0016	3	8183	0.0003665	case	0.0401
624	TMEM35	5	3088	0.0016	3	8183	0.0003665	case	0.0401
625	C12orf65	5	3088	0.0016	3	8183	0.0003665	case	0.0401
626	CNRIP1	5	3088	0.0016	3	8183	0.0003665	case	0.0401
627	S100A2	5	3088	0.0016	3	8183	0.0003665	case	0.0401
628	ZNF575	5	3088	0.0016	3	8183	0.0003665	case	0.0401
629	MED19	5	3088	0.0016	3	8183	0.0003665	case	0.0401
630	NDUFB7	5	3088	0.0016	3	8183	0.0003665	case	0.0401
631	C9orf41	5	3088	0.0016	3	8183	0.0003665	case	0.0401
632	MAMDC2	11	3082	0.0036	57	8129	0.007	ctrl	0.0402
633	KIRREL2	11	3082	0.0036	57	8129	0.007	ctrl	0.0402
634	RELL1	10	3083	0.0032	10	8176	0.0012	case	0.0404
635	HIST1H2BI	10	3083	0.0032	10	8176	0.0012	case	0.0404
636	TLK1	10	3083	0.0032	10	8176	0.0012	case	0.0404
637	IL12RB1	30	3063	0.0097	48	8138	0.0059	case	0.0405
638	SIRT4	16	3077	0.0052	21	8165	0.0026	case	0.0408
639	XKR9	16	3077	0.0052	21	8165	0.0026	case	0.0408
640	COPB2	16	3077	0.0052	21	8165	0.0026	case	0.0408
641	WBP2NL	16	3077	0.0052	21	8165	0.0026	case	0.0408
642	RASGRP2	16	3077	0.0052	21	8165	0.0026	case	0.0408
643	ZZZ3	24	3069	0.0078	36	8150	0.0044	case	0.0409
644	AGAP1	40	3053	0.0129	70	8116	0.0086	case	0.0409
645	GIGYF2	36	3057	0.0116	62	8124	0.0076	case	0.041
646	UROD	14	3079	0.0045	17	8169	0.0021	case	0.0411
647	GINS2	14	3079	0.0045	17	8169	0.0021	case	0.0411
648	C19orf44	14	3079	0.0045	17	8169	0.0021	case	0.0411
649	FASN	33	3060	0.0107	130	8056	0.0159	ctrl	0.0416
650	LRRC31	6	3087	0.0019	38	8148	0.0046	ctrl	0.0417
651	BPIFB2	6	3087	0.0019	38	8148	0.0046	ctrl	0.0417
652	CLK3	6	3087	0.0019	38	8148	0.0046	ctrl	0.0417
653	OR1B1	6	3087	0.0019	38	8148	0.0046	ctrl	0.0417
654	FAM49B	0	3093	0	11	8175	0.0013	ctrl	0.0423
655	LPPR5	0	3093	0	11	8175	0.0013	ctrl	0.0423
656	COA1	0	3093	0	11	8175	0.0013	ctrl	0.0423
657	TK1	0	3093	0	11	8175	0.0013	ctrl	0.0423
658	C15orf26	0	3093	0	11	8175	0.0013	ctrl	0.0423
659	SPA17	0	3093	0	11	8175	0.0013	ctrl	0.0423
660	CCL1	0	3093	0	11	8175	0.0013	ctrl	0.0423
661	PSAPL1	21	3072	0.0068	31	8155	0.0038	case	0.0424
662	CCDC17	21	3072	0.0068	31	8155	0.0038	case	0.0424
663	NUDCD1	6	3087	0.0019	39	8147	0.0048	ctrl	0.0427
664	LIMS2	6	3087	0.0019	39	8147	0.0048	ctrl	0.0427
665	ASXL3	24	3069	0.0078	101	8085	0.0123	ctrl	0.0432
666	ITPRIPL1	27	3066	0.0087	43	8143	0.0053	case	0.0432
667	ACAD9	27	3066	0.0087	43	8143	0.0053	case	0.0432
668	GAB1	24	3069	0.0078	37	8149	0.0045	case	0.0434
669	SUPV3L1	24	3069	0.0078	37	8149	0.0045	case	0.0434
670	ZNF281	24	3069	0.0078	37	8149	0.0045	case	0.0434
671	HIVEP1	67	3026	0.0217	130	8056	0.0159	case	0.0436
672	VPS13B	79	3014	0.0255	269	7917	0.0329	ctrl	0.0442
673	SLC5A10	14	3079	0.0045	66	8120	0.0081	ctrl	0.0448
674	SUGP2	14	3079	0.0045	66	8120	0.0081	ctrl	0.0448
675	CCDC146	14	3079	0.0045	67	8119	0.0082	ctrl	0.0448
676	FBXO24	8	3085	0.0026	45	8141	0.0055	ctrl	0.0448
677	CDC34	0	3093	0	12	8174	0.0015	ctrl	0.0451
678	BCL7A	0	3093	0	12	8174	0.0015	ctrl	0.0451
679	NMS	0	3093	0	12	8174	0.0015	ctrl	0.0451
680	ODF3B	0	3093	0	12	8174	0.0015	ctrl	0.0451
681	AMTN	0	3093	0	12	8174	0.0015	ctrl	0.0451
682	ANKRD66	0	3093	0	12	8174	0.0015	ctrl	0.0451
683	PDE6D	0	3093	0	12	8174	0.0015	ctrl	0.0451
684	XKR8	12	3081	0.0039	14	8172	0.0017	case	0.0451
685	TATDN3	12	3081	0.0039	14	8172	0.0017	case	0.0451
686	C9orf96	12	3081	0.0039	14	8172	0.0017	case	0.0451
687	BSN	80	3013	0.0259	272	7914	0.0332	ctrl	0.0452
688	CYP11B2	8	3085	0.0026	46	8140	0.0056	ctrl	0.0454
689	MEF2A	8	3085	0.0026	46	8140	0.0056	ctrl	0.0454
690	CCDC181	19	3074	0.0061	27	8159	0.0033	case	0.0455
691	PADI3	31	3062	0.01	51	8135	0.0062	case	0.0458
692	SLC4A1AP	12	3081	0.0039	60	8126	0.0073	ctrl	0.0459
693	OAS2	12	3081	0.0039	60	8126	0.0073	ctrl	0.0459
694	TIAM1	25	3068	0.0081	103	8083	0.0126	ctrl	0.0461
695	NLRP12	25	3068	0.0081	103	8083	0.0126	ctrl	0.0461
696	EXTL1	10	3083	0.0032	53	8133	0.0065	ctrl	0.0463
697	LMTK3	10	3083	0.0032	53	8133	0.0065	ctrl	0.0463
698	CD180	10	3083	0.0032	53	8133	0.0065	ctrl	0.0463
699	LCLAT1	16	3077	0.0052	22	8164	0.0027	case	0.0465
700	FAM169A	16	3077	0.0052	22	8164	0.0027	case	0.0465
701	OR1D2	16	3077	0.0052	22	8164	0.0027	case	0.0465
702	MTMR8	16	3077	0.0052	22	8164	0.0027	case	0.0465
703	KPNA2	16	3077	0.0052	22	8164	0.0027	case	0.0465
704	CCDC102B	16	3077	0.0052	22	8164	0.0027	case	0.0465
705	C1QTNF2	16	3077	0.0052	22	8164	0.0027	case	0.0465
706	RREB1	25	3068	0.0081	104	8082	0.0127	ctrl	0.0465
707	CORO1B	5	3088	0.0016	34	8152	0.0042	ctrl	0.0465
708	IFT52	5	3088	0.0016	34	8152	0.0042	ctrl	0.0465
709	TINAGL1	5	3088	0.0016	34	8152	0.0042	ctrl	0.0465
710	SLC51A	5	3088	0.0016	34	8152	0.0042	ctrl	0.0465
711	INPP5E	5	3088	0.0016	34	8152	0.0042	ctrl	0.0465
712	AAMP	14	3079	0.0045	18	8168	0.0022	case	0.0466
713	GFRA2	14	3079	0.0045	18	8168	0.0022	case	0.0466
714	RCOR2	14	3079	0.0045	18	8168	0.0022	case	0.0466
715	GDAP1	14	3079	0.0045	18	8168	0.0022	case	0.0466
716	SPTLC1	14	3079	0.0045	18	8168	0.0022	case	0.0466
717	POLQ	79	3014	0.0255	159	8027	0.0194	case	0.0473
718	SORCS2	17	3076	0.0055	76	8110	0.0093	ctrl	0.0475
719	IRAK2	22	3071	0.0071	33	8153	0.004	case	0.0476
720	PDE4DIP	46	3047	0.0149	84	8102	0.0103	case	0.0476
721	DNAH5	94	2999	0.0304	313	7873	0.0382	ctrl	0.0476
722	DNMT3A	31	3062	0.01	52	8134	0.0064	case	0.0479
723	PCDHGA2	25	3068	0.0081	39	8147	0.0048	case	0.048
724	MYH6	36	3057	0.0116	137	8049	0.0167	ctrl	0.0486
725	RMND5B	17	3076	0.0055	23	8163	0.0028	case	0.0486
726	SPOCK2	10	3083	0.0032	11	8175	0.0013	case	0.0488
727	PLAC8L1	10	3083	0.0032	11	8175	0.0013	case	0.0488
728	THOC1	10	3083	0.0032	11	8175	0.0013	case	0.0488
729	SLC25A32	10	3083	0.0032	11	8175	0.0013	case	0.0488
730	C14orf93	10	3083	0.0032	11	8175	0.0013	case	0.0488
731	MRPL52	10	3083	0.0032	11	8175	0.0013	case	0.0488
732	HIVEP3	10	3083	0.0032	11	8175	0.0013	case	0.0488
733	UBE2U	10	3083	0.0032	11	8175	0.0013	case	0.0488
734	USF1	10	3083	0.0032	11	8175	0.0013	case	0.0488
735	LRRTM3	10	3083	0.0032	11	8175	0.0013	case	0.0488
736	CCNI	10	3083	0.0032	11	8175	0.0013	case	0.0488
737	CHL1	20	3073	0.0065	87	8099	0.0106	ctrl	0.0493
738	ARAP1	20	3073	0.0065	87	8099	0.0106	ctrl	0.0493
739	PTPRH	51	3042	0.0165	95	8091	0.0116	case	0.0494
740	MX2	28	3065	0.0091	46	8140	0.0056	case	0.0497
741	MAP3K1	28	3065	0.0091	46	8140	0.0056	case	0.0497
742	PDCD11	55	3038	0.0178	105	8081	0.0128	case	0.0498
743	ATXN1	15	3078	0.0048	70	8116	0.0086	ctrl	0.05
744	SUSD5	19	3074	0.0061	28	8158	0.0034	case	0.05
745	BIN2	19	3074	0.0061	28	8158	0.0034	case	0.05
746	CCDC121	19	3074	0.0061	28	8158	0.0034	case	0.05
747	CNOT1	39	3054	0.0126	69	8117	0.0084	case	0.0505
748	RFPL2	4	3089	0.0013	29	8157	0.0035	ctrl	0.0508
749	RNF112	4	3089	0.0013	29	8157	0.0035	ctrl	0.0508
750	RNASEH2B	4	3089	0.0013	29	8157	0.0035	ctrl	0.0508
751	ALG2	4	3089	0.0013	29	8157	0.0035	ctrl	0.0508
752	MB21D1	4	3089	0.0013	29	8157	0.0035	ctrl	0.0508
753	CCDC54	4	3089	0.0013	29	8157	0.0035	ctrl	0.0508
754	TMEM19	4	3089	0.0013	29	8157	0.0035	ctrl	0.0508
755	CACNB1	4	3089	0.0013	29	8157	0.0035	ctrl	0.0508
756	MLLT1	4	3089	0.0013	29	8157	0.0035	ctrl	0.0508
757	LRG1	4	3089	0.0013	29	8157	0.0035	ctrl	0.0508
758	TUBB6	4	3089	0.0013	29	8157	0.0035	ctrl	0.0508
759	OR6C3	4	3089	0.0013	29	8157	0.0035	ctrl	0.0508
760	CCDC122	4	3089	0.0013	29	8157	0.0035	ctrl	0.0508
761	ZNF584	4	3089	0.0013	29	8157	0.0035	ctrl	0.0508
762	PHF1	4	3089	0.0013	29	8157	0.0035	ctrl	0.0508
763	ZBTB32	4	3089	0.0013	29	8157	0.0035	ctrl	0.0508
764	MGAT4A	4	3089	0.0013	29	8157	0.0035	ctrl	0.0508
765	GFM1	7	3086	0.0023	41	8145	0.005	ctrl	0.0508
766	KRT73	7	3086	0.0023	41	8145	0.005	ctrl	0.0508
767	CCDC9	22	3071	0.0071	34	8152	0.0042	case	0.0512
768	ALPP	22	3071	0.0071	34	8152	0.0042	case	0.0512
769	CLSTN3	13	3080	0.0042	62	8124	0.0076	ctrl	0.0514
770	BBC3	8	3085	0.0026	8	8178	0.0009773	case	0.0516
771	DIO3	8	3085	0.0026	8	8178	0.0009773	case	0.0516
772	REXO2	8	3085	0.0026	8	8178	0.0009773	case	0.0516
773	OR5H1	8	3085	0.0026	8	8178	0.0009773	case	0.0516
774	C8orf74	8	3085	0.0026	8	8178	0.0009773	case	0.0516
775	SKA2	8	3085	0.0026	8	8178	0.0009773	case	0.0516
776	CHMP2B	8	3085	0.0026	8	8178	0.0009773	case	0.0516
777	RPL24	4	3089	0.0013	2	8184	0.0002443	case	0.0518
778	FTH1	4	3089	0.0013	2	8184	0.0002443	case	0.0518
779	UQCR10	4	3089	0.0013	2	8184	0.0002443	case	0.0518
780	RPS12	4	3089	0.0013	2	8184	0.0002443	case	0.0518
781	C20orf173	4	3089	0.0013	2	8184	0.0002443	case	0.0518
782	PRSS27	4	3089	0.0013	2	8184	0.0002443	case	0.0518
783	C11orf74	4	3089	0.0013	2	8184	0.0002443	case	0.0518
784	IL21	4	3089	0.0013	2	8184	0.0002443	case	0.0518
785	S100A5	4	3089	0.0013	2	8184	0.0002443	case	0.0518
786	ATPIF1	4	3089	0.0013	2	8184	0.0002443	case	0.0518
787	PCNA	4	3089	0.0013	2	8184	0.0002443	case	0.0518
788	AVP	4	3089	0.0013	2	8184	0.0002443	case	0.0518
789	BATF	4	3089	0.0013	2	8184	0.0002443	case	0.0518
790	ELL2	4	3089	0.0013	30	8156	0.0037	ctrl	0.0518
791	GTF2H1	4	3089	0.0013	30	8156	0.0037	ctrl	0.0518
792	TMEM194A	4	3089	0.0013	30	8156	0.0037	ctrl	0.0518
793	PRR5L	4	3089	0.0013	30	8156	0.0037	ctrl	0.0518
794	MADCAM1	4	3089	0.0013	30	8156	0.0037	ctrl	0.0518
795	GLT8D2	4	3089	0.0013	30	8156	0.0037	ctrl	0.0518
796	OR6C74	4	3089	0.0013	30	8156	0.0037	ctrl	0.0518
797	MAP6	4	3089	0.0013	30	8156	0.0037	ctrl	0.0518
798	KIF27	18	3075	0.0058	79	8107	0.0097	ctrl	0.0519
799	CC2D1A	18	3075	0.0058	79	8107	0.0097	ctrl	0.0519
800	MUC7	20	3073	0.0065	29	8157	0.0035	case	0.0523
801	PCDP1	11	3082	0.0036	55	8131	0.0067	ctrl	0.0525
802	CPXM1	11	3082	0.0036	55	8131	0.0067	ctrl	0.0525
803	TBC1D17	11	3082	0.0036	55	8131	0.0067	ctrl	0.0525
804	NOC3L	9	3084	0.0029	48	8138	0.0059	ctrl	0.0525
805	NELL1	9	3084	0.0029	48	8138	0.0059	ctrl	0.0525
806	ZBTB49	9	3084	0.0029	48	8138	0.0059	ctrl	0.0525
807	ZNF729	21	3072	0.0068	89	8097	0.0109	ctrl	0.0529
808	FBXO47	17	3076	0.0055	24	8162	0.0029	case	0.0529
809	ADRA2B	17	3076	0.0055	24	8162	0.0029	case	0.0529
810	PLEKHA1	17	3076	0.0055	24	8162	0.0029	case	0.0529
811	ZSWIM1	17	3076	0.0055	24	8162	0.0029	case	0.0529
812	LRSAM1	11	3082	0.0036	56	8130	0.0068	ctrl	0.0533
813	FAM98A	11	3082	0.0036	56	8130	0.0068	ctrl	0.0533
814	PCDH15	42	3051	0.0136	155	8031	0.0189	ctrl	0.0533
815	XIRP1	42	3051	0.0136	156	8030	0.0191	ctrl	0.0534
816	EVI2A	12	3081	0.0039	15	8171	0.0018	case	0.0534
817	CCDC102A	12	3081	0.0039	15	8171	0.0018	case	0.0534
818	B4GALT4	12	3081	0.0039	15	8171	0.0018	case	0.0534
819	COG8	9	3084	0.0029	49	8137	0.006	ctrl	0.0536
820	EML6	72	3021	0.0233	144	8042	0.0176	case	0.0541
821	ZIC4	1	3092	0.0003233	16	8170	0.002	ctrl	0.0546
822	RNF122	1	3092	0.0003233	16	8170	0.002	ctrl	0.0546
823	COMMD10	1	3092	0.0003233	16	8170	0.002	ctrl	0.0546
824	ACOT6	1	3092	0.0003233	16	8170	0.002	ctrl	0.0546
825	PRDX5	1	3092	0.0003233	16	8170	0.002	ctrl	0.0546
826	GABRA4	1	3092	0.0003233	16	8170	0.002	ctrl	0.0546
827	RNASE11	1	3092	0.0003233	16	8170	0.002	ctrl	0.0546
828	RUNX3	1	3092	0.0003233	16	8170	0.002	ctrl	0.0546
829	SASH3	1	3092	0.0003233	16	8170	0.002	ctrl	0.0546
830	LHFPL4	1	3092	0.0003233	16	8170	0.002	ctrl	0.0546
831	CDK8	1	3092	0.0003233	16	8170	0.002	ctrl	0.0546
832	ABCF1	1	3092	0.0003233	16	8170	0.002	ctrl	0.0546
833	SCN1A	16	3077	0.0052	72	8114	0.0088	ctrl	0.0547
834	AAR2	3	3090	0.0009699	25	8161	0.0031	ctrl	0.0547
835	LDHB	3	3090	0.0009699	25	8161	0.0031	ctrl	0.0547
836	ANKRD13B	3	3090	0.0009699	25	8161	0.0031	ctrl	0.0547
837	HYI	3	3090	0.0009699	25	8161	0.0031	ctrl	0.0547
838	NDUFAF2	3	3090	0.0009699	25	8161	0.0031	ctrl	0.0547
839	AIM2	3	3090	0.0009699	25	8161	0.0031	ctrl	0.0547
840	FOXL1	3	3090	0.0009699	25	8161	0.0031	ctrl	0.0547
841	OR1I1	3	3090	0.0009699	25	8161	0.0031	ctrl	0.0547
842	OR13F1	3	3090	0.0009699	25	8161	0.0031	ctrl	0.0547
843	COL4A4	53	3040	0.0171	100	8086	0.0122	case	0.0548
844	TRAPPC6A	7	3086	0.0023	6	8180	0.000733	case	0.0549
845	IFNL3	7	3086	0.0023	6	8180	0.000733	case	0.0549
846	TMEM88	7	3086	0.0023	6	8180	0.000733	case	0.0549
847	BTG3	7	3086	0.0023	6	8180	0.000733	case	0.0549
848	HIST1H2BL	7	3086	0.0023	6	8180	0.000733	case	0.0549
849	ENOPH1	7	3086	0.0023	6	8180	0.000733	case	0.0549
850	C8orf76	7	3086	0.0023	6	8180	0.000733	case	0.0549
851	SAR1B	7	3086	0.0023	6	8180	0.000733	case	0.0549
852	KLHDC4	16	3077	0.0052	73	8113	0.0089	ctrl	0.0554
853	EIF4ENIF1	16	3077	0.0052	73	8113	0.0089	ctrl	0.0554
854	BIN1	15	3078	0.0048	20	8166	0.0024	case	0.0555
855	FCRL1	15	3078	0.0048	20	8166	0.0024	case	0.0555
856	PDE8B	15	3078	0.0048	20	8166	0.0024	case	0.0555
857	ZNF800	15	3078	0.0048	20	8166	0.0024	case	0.0555
858	ZNF627	15	3078	0.0048	20	8166	0.0024	case	0.0555
859	SOAT1	20	3073	0.0065	30	8156	0.0037	case	0.0557
860	MDGA2	20	3073	0.0065	30	8156	0.0037	case	0.0557
861	PLOD2	20	3073	0.0065	30	8156	0.0037	case	0.0557
862	ADCYAP1R1	20	3073	0.0065	30	8156	0.0037	case	0.0557
863	ATE1	20	3073	0.0065	30	8156	0.0037	case	0.0557
864	KRT32	20	3073	0.0065	30	8156	0.0037	case	0.0557
865	FRMPD1	28	3065	0.0091	112	8074	0.0137	ctrl	0.056
866	SYCP2	19	3074	0.0061	82	8104	0.01	ctrl	0.0564
867	PPFIA1	19	3074	0.0061	82	8104	0.01	ctrl	0.0564
868	NNT	29	3064	0.0094	49	8137	0.006	case	0.0565
869	GPR12	2	3091	0.0006466	20	8166	0.0024	ctrl	0.0566
870	METAP1	2	3091	0.0006466	20	8166	0.0024	ctrl	0.0566
871	MPZL1	2	3091	0.0006466	20	8166	0.0024	ctrl	0.0566
872	SKA1	2	3091	0.0006466	20	8166	0.0024	ctrl	0.0566
873	CYB561A3	2	3091	0.0006466	20	8166	0.0024	ctrl	0.0566
874	ELAC1	2	3091	0.0006466	20	8166	0.0024	ctrl	0.0566
875	IRGM	2	3091	0.0006466	20	8166	0.0024	ctrl	0.0566
876	ZBTB44	2	3091	0.0006466	20	8166	0.0024	ctrl	0.0566
877	ZFP36L2	2	3091	0.0006466	20	8166	0.0024	ctrl	0.0566
878	NOD1	25	3068	0.0081	102	8084	0.0125	ctrl	0.0568
879	PLEKHG2	22	3071	0.0071	92	8094	0.0112	ctrl	0.057
880	PTPN22	33	3060	0.0107	57	8129	0.007	case	0.0571
881	LMAN1L	6	3087	0.0019	36	8150	0.0044	ctrl	0.0574
882	TCN2	6	3087	0.0019	36	8150	0.0044	ctrl	0.0574
883	DNAJB12	6	3087	0.0019	36	8150	0.0044	ctrl	0.0574
884	CYP51A1	6	3087	0.0019	36	8150	0.0044	ctrl	0.0574
885	FNTB	13	3080	0.0042	16	8170	0.002	case	0.0575
886	SMARCD3	13	3080	0.0042	16	8170	0.002	case	0.0575
887	RXFP4	13	3080	0.0042	16	8170	0.002	case	0.0575
888	KRTAP10-8	13	3080	0.0042	16	8170	0.002	case	0.0575
889	TRPC1	13	3080	0.0042	16	8170	0.002	case	0.0575
890	AQP6	13	3080	0.0042	16	8170	0.002	case	0.0575
891	HELT	13	3080	0.0042	16	8170	0.002	case	0.0575
892	FAR2	13	3080	0.0042	16	8170	0.002	case	0.0575
893	SNX22	13	3080	0.0042	16	8170	0.002	case	0.0575
894	OR10G8	13	3080	0.0042	16	8170	0.002	case	0.0575
895	C2orf42	13	3080	0.0042	16	8170	0.002	case	0.0575
896	ZNF583	13	3080	0.0042	16	8170	0.002	case	0.0575
897	QPRT	2	3091	0.0006466	21	8165	0.0026	ctrl	0.0579
898	RABL3	2	3091	0.0006466	21	8165	0.0026	ctrl	0.0579
899	CXCR5	2	3091	0.0006466	21	8165	0.0026	ctrl	0.0579
900	TMEM212	2	3091	0.0006466	21	8165	0.0026	ctrl	0.0579
901	DPPA3	2	3091	0.0006466	21	8165	0.0026	ctrl	0.0579
902	VGLL4	2	3091	0.0006466	21	8165	0.0026	ctrl	0.0579
903	GIPC1	2	3091	0.0006466	21	8165	0.0026	ctrl	0.0579
904	METTL6	2	3091	0.0006466	21	8165	0.0026	ctrl	0.0579
905	CD27	2	3091	0.0006466	21	8165	0.0026	ctrl	0.0579
906	PDGFRL	6	3087	0.0019	37	8149	0.0045	ctrl	0.0579
907	UMPS	6	3087	0.0019	37	8149	0.0045	ctrl	0.0579
908	JPH3	6	3087	0.0019	37	8149	0.0045	ctrl	0.0579
909	RGMA	6	3087	0.0019	37	8149	0.0045	ctrl	0.0579
910	MFGE8	6	3087	0.0019	37	8149	0.0045	ctrl	0.0579
911	PAMR1	30	3063	0.0097	50	8136	0.0061	case	0.0581
912	AGMO	30	3063	0.0097	50	8136	0.0061	case	0.0581
913	VAMP3	9	3084	0.0029	9	8177	0.0011	case	0.0589
914	NDEL1	9	3084	0.0029	9	8177	0.0011	case	0.0589
915	CSRP1	9	3084	0.0029	9	8177	0.0011	case	0.0589
916	TSEN34	9	3084	0.0029	9	8177	0.0011	case	0.0589
917	POLR3H	9	3084	0.0029	9	8177	0.0011	case	0.0589
918	C4orf51	9	3084	0.0029	9	8177	0.0011	case	0.0589
919	HIST1H2BJ	9	3084	0.0029	9	8177	0.0011	case	0.0589
920	ZNF30	12	3081	0.0039	58	8128	0.0071	ctrl	0.0593
921	CNTN4	12	3081	0.0039	58	8128	0.0071	ctrl	0.0593
922	MYH11	33	3060	0.0107	126	8060	0.0154	ctrl	0.0601
923	FLRT2	8	3085	0.0026	43	8143	0.0053	ctrl	0.0602
924	SOX30	8	3085	0.0026	43	8143	0.0053	ctrl	0.0602
925	ZNF878	8	3085	0.0026	43	8143	0.0053	ctrl	0.0602
926	INO80	30	3063	0.0097	51	8135	0.0062	case	0.0602
927	WWP2	30	3063	0.0097	51	8135	0.0062	case	0.0602
928	TAF3	8	3085	0.0026	44	8142	0.0054	ctrl	0.0604
929	HEATR3	8	3085	0.0026	44	8142	0.0054	ctrl	0.0604
930	COL14A1	33	3060	0.0107	127	8059	0.0155	ctrl	0.0604
931	ADD3	23	3070	0.0074	37	8149	0.0045	case	0.0605
932	SLC39A6	23	3070	0.0074	37	8149	0.0045	case	0.0605
933	SLC26A9	23	3070	0.0074	37	8149	0.0045	case	0.0605
934	FAM160A2	23	3070	0.0074	37	8149	0.0045	case	0.0605
935	GRHL1	23	3070	0.0074	37	8149	0.0045	case	0.0605
936	ZNF267	23	3070	0.0074	37	8149	0.0045	case	0.0605
937	MPP2	10	3083	0.0032	51	8135	0.0062	ctrl	0.0605
938	SCLT1	10	3083	0.0032	51	8135	0.0062	ctrl	0.0605
939	LILRA2	10	3083	0.0032	51	8135	0.0062	ctrl	0.0605
940	BCORL1	10	3083	0.0032	51	8135	0.0062	ctrl	0.0605
941	UBE4A	10	3083	0.0032	51	8135	0.0062	ctrl	0.0605
942	KLHL6	18	3075	0.0058	26	8160	0.0032	case	0.0607
943	POLRMT	20	3073	0.0065	85	8101	0.0104	ctrl	0.0611
944	ANKRD12	23	3070	0.0074	95	8091	0.0116	ctrl	0.0612
945	CSPG5	15	3078	0.0048	21	8165	0.0026	case	0.0619
946	CHST8	15	3078	0.0048	21	8165	0.0026	case	0.0619
947	E2F4	15	3078	0.0048	21	8165	0.0026	case	0.0619
948	UFL1	15	3078	0.0048	21	8165	0.0026	case	0.0619
949	PRKCD	15	3078	0.0048	21	8165	0.0026	case	0.0619
950	RFC3	15	3078	0.0048	21	8165	0.0026	case	0.0619
951	MS4A12	15	3078	0.0048	21	8165	0.0026	case	0.0619
952	IFT74	24	3069	0.0078	38	8148	0.0046	case	0.0621
953	PCDHB8	21	3072	0.0068	32	8154	0.0039	case	0.0624
954	CBFA2T3	21	3072	0.0068	32	8154	0.0039	case	0.0624
955	AKNAD1	27	3066	0.0087	45	8141	0.0055	case	0.0631
956	CENPF	34	3059	0.011	129	8057	0.0158	ctrl	0.0631
957	STON2	15	3078	0.0048	67	8119	0.0082	ctrl	0.0632
958	MYL7	11	3082	0.0036	13	8173	0.0016	case	0.0633
959	TNFAIP6	11	3082	0.0036	13	8173	0.0016	case	0.0633
960	KIAA1715	11	3082	0.0036	13	8173	0.0016	case	0.0633
961	MCM3AP	38	3055	0.0123	142	8044	0.0173	ctrl	0.0635
962	DFNB59	13	3080	0.0042	17	8169	0.0021	case	0.0636
963	N6AMT1	13	3080	0.0042	17	8169	0.0021	case	0.0636
964	SLC25A35	13	3080	0.0042	17	8169	0.0021	case	0.0636
965	HSD17B6	13	3080	0.0042	17	8169	0.0021	case	0.0636
966	SF3B1	13	3080	0.0042	17	8169	0.0021	case	0.0636
967	FN3KRP	13	3080	0.0042	17	8169	0.0021	case	0.0636
968	VTN	13	3080	0.0042	17	8169	0.0021	case	0.0636
969	SYT16	13	3080	0.0042	17	8169	0.0021	case	0.0636
970	TNNT3	13	3080	0.0042	17	8169	0.0021	case	0.0636
971	ST8SIA1	13	3080	0.0042	17	8169	0.0021	case	0.0636
972	PHF3	27	3066	0.0087	106	8080	0.0129	ctrl	0.0638
973	ATAD2	38	3055	0.0123	69	8117	0.0084	case	0.0643
974	ABCA6	38	3055	0.0123	69	8117	0.0084	case	0.0643
975	LAMB1	61	3032	0.0197	120	8066	0.0147	case	0.0643
976	HTR1D	5	3088	0.0016	32	8154	0.0039	ctrl	0.0644
977	TTLL1	5	3088	0.0016	32	8154	0.0039	ctrl	0.0644
978	WDR48	5	3088	0.0016	32	8154	0.0039	ctrl	0.0644
979	AMBN	5	3088	0.0016	32	8154	0.0039	ctrl	0.0644
980	CCNL2	5	3088	0.0016	32	8154	0.0039	ctrl	0.0644
981	SOHLH1	5	3088	0.0016	32	8154	0.0039	ctrl	0.0644
982	C5orf42	47	3046	0.0152	88	8098	0.0108	case	0.0646
983	BOC	24	3069	0.0078	97	8089	0.0118	ctrl	0.0649
984	GRIP1	18	3075	0.0058	77	8109	0.0094	ctrl	0.065
985	DNAH3	124	2969	0.0401	268	7918	0.0327	case	0.065
986	TCEAL8	3	3090	0.0009699	1	8185	0.0001222	case	0.0655
987	C12orf5	3	3090	0.0009699	1	8185	0.0001222	case	0.0655
988	SPANXN5	3	3090	0.0009699	1	8185	0.0001222	case	0.0655
989	HLA-DQA2	3	3090	0.0009699	1	8185	0.0001222	case	0.0655
990	ACTG1	3	3090	0.0009699	1	8185	0.0001222	case	0.0655
991	KRTAP2-3	3	3090	0.0009699	1	8185	0.0001222	case	0.0655
992	HIST1H2BG	3	3090	0.0009699	1	8185	0.0001222	case	0.0655
993	PCBP2	3	3090	0.0009699	1	8185	0.0001222	case	0.0655
994	C8orf82	3	3090	0.0009699	1	8185	0.0001222	case	0.0655
995	BASP1	3	3090	0.0009699	1	8185	0.0001222	case	0.0655
996	TMEM170B	3	3090	0.0009699	1	8185	0.0001222	case	0.0655
997	CXorf27	3	3090	0.0009699	1	8185	0.0001222	case	0.0655
998	CBY3	3	3090	0.0009699	1	8185	0.0001222	case	0.0655
999	EID2	3	3090	0.0009699	1	8185	0.0001222	case	0.0655
1000	RPS5	3	3090	0.0009699	1	8185	0.0001222	case	0.0655
1001	C16orf11	3	3090	0.0009699	1	8185	0.0001222	case	0.0655
1002	ADAM33	18	3075	0.0058	27	8159	0.0033	case	0.0656
1003	LRRC8D	18	3075	0.0058	27	8159	0.0033	case	0.0656
1004	TESK2	18	3075	0.0058	27	8159	0.0033	case	0.0656
1005	RFC4	18	3075	0.0058	27	8159	0.0033	case	0.0656
1006	ZNF343	18	3075	0.0058	27	8159	0.0033	case	0.0656
1007	MROH7	21	3072	0.0068	88	8098	0.0108	ctrl	0.0659
1008	HRC	13	3080	0.0042	60	8126	0.0073	ctrl	0.0661
1009	BIVM	5	3088	0.0016	33	8153	0.004	ctrl	0.0662
1010	SHBG	5	3088	0.0016	33	8153	0.004	ctrl	0.0662
1011	CD1E	5	3088	0.0016	33	8153	0.004	ctrl	0.0662
1012	PIBF1	21	3072	0.0068	33	8153	0.004	case	0.0663
1013	LGALS3BP	21	3072	0.0068	33	8153	0.004	case	0.0663
1014	GFM2	21	3072	0.0068	33	8153	0.004	case	0.0663
1015	GIPR	21	3072	0.0068	33	8153	0.004	case	0.0663
1016	EDC4	13	3080	0.0042	61	8125	0.0075	ctrl	0.0663
1017	ESYT1	31	3062	0.01	54	8132	0.0066	case	0.0671
1018	ARHGEF11	39	3054	0.0126	71	8115	0.0087	case	0.0673
1019	ADSSL1	11	3082	0.0036	53	8133	0.0065	ctrl	0.0684
1020	IMPG2	11	3082	0.0036	53	8133	0.0065	ctrl	0.0684
1021	FAM91A1	7	3086	0.0023	39	8147	0.0048	ctrl	0.0686
1022	SLC46A2	7	3086	0.0023	39	8147	0.0048	ctrl	0.0686
1023	OR1M1	7	3086	0.0023	39	8147	0.0048	ctrl	0.0686
1024	ADHFE1	7	3086	0.0023	39	8147	0.0048	ctrl	0.0686
1025	IGSF11	9	3084	0.0029	10	8176	0.0012	case	0.0686
1026	RAB27A	9	3084	0.0029	10	8176	0.0012	case	0.0686
1027	RAB23	9	3084	0.0029	10	8176	0.0012	case	0.0686
1028	STARD6	9	3084	0.0029	10	8176	0.0012	case	0.0686
1029	SPON2	9	3084	0.0029	10	8176	0.0012	case	0.0686
1030	VSTM2A	9	3084	0.0029	10	8176	0.0012	case	0.0686
1031	RALY	9	3084	0.0029	10	8176	0.0012	case	0.0686
1032	VDAC3	9	3084	0.0029	10	8176	0.0012	case	0.0686
1033	JKAMP	9	3084	0.0029	10	8176	0.0012	case	0.0686
1034	C2orf44	9	3084	0.0029	10	8176	0.0012	case	0.0686
1035	NAT9	9	3084	0.0029	10	8176	0.0012	case	0.0686
1036	GOPC	9	3084	0.0029	10	8176	0.0012	case	0.0686
1037	ST8SIA2	9	3084	0.0029	10	8176	0.0012	case	0.0686
1038	NBEAL2	79	3014	0.0255	163	8023	0.0199	case	0.0687
1039	TRIM5	11	3082	0.0036	54	8132	0.0066	ctrl	0.0688
1040	TMEM63C	11	3082	0.0036	54	8132	0.0066	ctrl	0.0688
1041	ASAP2	11	3082	0.0036	54	8132	0.0066	ctrl	0.0688
1042	MCMDC2	11	3082	0.0036	54	8132	0.0066	ctrl	0.0688
1043	LRP10	11	3082	0.0036	54	8132	0.0066	ctrl	0.0688
1044	MYH4	36	3057	0.0116	134	8052	0.0164	ctrl	0.0689
1045	KIAA1217	36	3057	0.0116	134	8052	0.0164	ctrl	0.0689
1046	PCDHGB6	16	3077	0.0052	70	8116	0.0086	ctrl	0.069
1047	ZCCHC6	16	3077	0.0052	70	8116	0.0086	ctrl	0.069
1048	LYST	59	3034	0.0191	204	7982	0.0249	ctrl	0.0691
1049	CHTF18	25	3068	0.0081	100	8086	0.0122	ctrl	0.0691
1050	OTUD7B	9	3084	0.0029	46	8140	0.0056	ctrl	0.0694
1051	EMILIN2	16	3077	0.0052	71	8115	0.0087	ctrl	0.0695
1052	COL4A1	16	3077	0.0052	71	8115	0.0087	ctrl	0.0695
1053	ZBTB4	7	3086	0.0023	40	8146	0.0049	ctrl	0.0697
1054	GNPTG	7	3086	0.0023	40	8146	0.0049	ctrl	0.0697
1055	CYP19A1	7	3086	0.0023	40	8146	0.0049	ctrl	0.0697
1056	TMEM26	7	3086	0.0023	40	8146	0.0049	ctrl	0.0697
1057	TBC1D31	39	3054	0.0126	72	8114	0.0088	case	0.0697
1058	TAS1R2	22	3071	0.0071	90	8096	0.011	ctrl	0.0701
1059	PER2	22	3071	0.0071	90	8096	0.011	ctrl	0.0701
1060	SEMA3F	9	3084	0.0029	47	8139	0.0057	ctrl	0.0702
1061	SLC52A2	9	3084	0.0029	47	8139	0.0057	ctrl	0.0702
1062	CPT1A	9	3084	0.0029	47	8139	0.0057	ctrl	0.0702
1063	CARD18	5	3088	0.0016	4	8182	0.0004886	case	0.0702
1064	SRP14	5	3088	0.0016	4	8182	0.0004886	case	0.0702
1065	NAA30	5	3088	0.0016	4	8182	0.0004886	case	0.0702
1066	IER5	5	3088	0.0016	4	8182	0.0004886	case	0.0702
1067	WFDC6	5	3088	0.0016	4	8182	0.0004886	case	0.0702
1068	C8orf46	5	3088	0.0016	4	8182	0.0004886	case	0.0702
1069	TACSTD2	5	3088	0.0016	4	8182	0.0004886	case	0.0702
1070	GHRH	5	3088	0.0016	4	8182	0.0004886	case	0.0702
1071	ALYREF	5	3088	0.0016	4	8182	0.0004886	case	0.0702
1072	FGFBP1	5	3088	0.0016	4	8182	0.0004886	case	0.0702
1073	C2orf47	5	3088	0.0016	4	8182	0.0004886	case	0.0702
1074	ZNF605	5	3088	0.0016	4	8182	0.0004886	case	0.0702
1075	GNAZ	5	3088	0.0016	4	8182	0.0004886	case	0.0702
1076	HEATR5B	53	3040	0.0171	103	8083	0.0126	case	0.0706
1077	ADRA1B	16	3077	0.0052	23	8163	0.0028	case	0.0707
1078	GAL3ST1	16	3077	0.0052	23	8163	0.0028	case	0.0707
1079	OPRK1	16	3077	0.0052	23	8163	0.0028	case	0.0707
1080	ZNF665	25	3068	0.0081	41	8145	0.005	case	0.0708
1081	EMC3	0	3093	0	10	8176	0.0012	ctrl	0.0714
1082	EED	0	3093	0	10	8176	0.0012	ctrl	0.0714
1083	IL1F10	0	3093	0	10	8176	0.0012	ctrl	0.0714
1084	HSPB11	0	3093	0	10	8176	0.0012	ctrl	0.0714
1085	CXCL17	0	3093	0	10	8176	0.0012	ctrl	0.0714
1086	CAB39	0	3093	0	10	8176	0.0012	ctrl	0.0714
1087	SAA1	0	3093	0	10	8176	0.0012	ctrl	0.0714
1088	CENPBD1	0	3093	0	10	8176	0.0012	ctrl	0.0714
1089	PRKCI	0	3093	0	10	8176	0.0012	ctrl	0.0714
1090	CDKN2D	0	3093	0	10	8176	0.0012	ctrl	0.0714
1091	C12orf44	0	3093	0	10	8176	0.0012	ctrl	0.0714
1092	IL19	0	3093	0	10	8176	0.0012	ctrl	0.0714
1093	PROK2	0	3093	0	10	8176	0.0012	ctrl	0.0714
1094	ILF2	0	3093	0	10	8176	0.0012	ctrl	0.0714
1095	SNRPC	0	3093	0	10	8176	0.0012	ctrl	0.0714
1096	PACRGL	0	3093	0	10	8176	0.0012	ctrl	0.0714
1097	PABPN1L	0	3093	0	10	8176	0.0012	ctrl	0.0714
1098	CCDC177	0	3093	0	10	8176	0.0012	ctrl	0.0714
1099	KRTCAP2	0	3093	0	10	8176	0.0012	ctrl	0.0714
1100	C7orf55-LUC7L2	0	3093	0	10	8176	0.0012	ctrl	0.0714
1101	PNPLA7	44	3049	0.0142	83	8103	0.0101	case	0.0718
1102	METTL21A	7	3086	0.0023	7	8179	0.0008551	case	0.0719
1103	DLX6	7	3086	0.0023	7	8179	0.0008551	case	0.0719
1104	IL4	7	3086	0.0023	7	8179	0.0008551	case	0.0719
1105	HLA-DQB2	7	3086	0.0023	7	8179	0.0008551	case	0.0719
1106	TIRAP	7	3086	0.0023	7	8179	0.0008551	case	0.0719
1107	DNAJC9	7	3086	0.0023	7	8179	0.0008551	case	0.0719
1108	C1orf43	7	3086	0.0023	7	8179	0.0008551	case	0.0719
1109	MUC20	7	3086	0.0023	7	8179	0.0008551	case	0.0719
1110	HMGN3	7	3086	0.0023	7	8179	0.0008551	case	0.0719
1111	CLDN17	7	3086	0.0023	7	8179	0.0008551	case	0.0719
1112	DYDC1	7	3086	0.0023	7	8179	0.0008551	case	0.0719
1113	UPF3B	7	3086	0.0023	7	8179	0.0008551	case	0.0719
1114	CCL13	7	3086	0.0023	7	8179	0.0008551	case	0.0719
1115	ABHD17A	7	3086	0.0023	7	8179	0.0008551	case	0.0719
1116	TSPAN33	7	3086	0.0023	7	8179	0.0008551	case	0.0719
1117	UBE2C	7	3086	0.0023	7	8179	0.0008551	case	0.0719
1118	TMEM50A	7	3086	0.0023	7	8179	0.0008551	case	0.0719
1119	SPOP	7	3086	0.0023	7	8179	0.0008551	case	0.0719
1120	CXorf57	7	3086	0.0023	7	8179	0.0008551	case	0.0719
1121	GOLGA4	33	3060	0.0107	124	8062	0.0151	ctrl	0.0719
1122	SLC7A11	4	3089	0.0013	27	8159	0.0033	ctrl	0.072
1123	FAM170B	4	3089	0.0013	27	8159	0.0033	ctrl	0.072
1124	OLR1	4	3089	0.0013	27	8159	0.0033	ctrl	0.072
1125	EFCAB3	4	3089	0.0013	27	8159	0.0033	ctrl	0.072
1126	CTSZ	4	3089	0.0013	27	8159	0.0033	ctrl	0.072
1127	PDCD4	4	3089	0.0013	27	8159	0.0033	ctrl	0.072
1128	AQP1	4	3089	0.0013	27	8159	0.0033	ctrl	0.072
1129	C15orf39	4	3089	0.0013	27	8159	0.0033	ctrl	0.072
1130	EXOSC5	4	3089	0.0013	27	8159	0.0033	ctrl	0.072
1131	TIMM44	4	3089	0.0013	27	8159	0.0033	ctrl	0.072
1132	APLNR	4	3089	0.0013	27	8159	0.0033	ctrl	0.072
1133	OR2L13	4	3089	0.0013	28	8158	0.0034	ctrl	0.0723
1134	GALR1	4	3089	0.0013	28	8158	0.0034	ctrl	0.0723
1135	SCGN	4	3089	0.0013	28	8158	0.0034	ctrl	0.0723
1136	ACAP3	4	3089	0.0013	28	8158	0.0034	ctrl	0.0723
1137	KDM4E	4	3089	0.0013	28	8158	0.0034	ctrl	0.0723
1138	RORC	4	3089	0.0013	28	8158	0.0034	ctrl	0.0723
1139	CCNJ	4	3089	0.0013	28	8158	0.0034	ctrl	0.0723
1140	RBBP8NL	4	3089	0.0013	28	8158	0.0034	ctrl	0.0723
1141	GPS2	4	3089	0.0013	28	8158	0.0034	ctrl	0.0723
1142	MBD4	22	3071	0.0071	35	8151	0.0043	case	0.0728
1143	PLD3	22	3071	0.0071	35	8151	0.0043	case	0.0728
1144	ZNF268	22	3071	0.0071	35	8151	0.0043	case	0.0728
1145	STAM	22	3071	0.0071	35	8151	0.0043	case	0.0728
1146	SLC34A2	14	3079	0.0045	63	8123	0.0077	ctrl	0.0729
1147	RPRD2	14	3079	0.0045	63	8123	0.0077	ctrl	0.0729
1148	COL22A1	54	3039	0.0175	105	8081	0.0128	case	0.0729
1149	AKR1C1	11	3082	0.0036	14	8172	0.0017	case	0.0729
1150	ETFA	11	3082	0.0036	14	8172	0.0017	case	0.0729
1151	LIPK	11	3082	0.0036	14	8172	0.0017	case	0.0729
1152	KLHDC2	11	3082	0.0036	14	8172	0.0017	case	0.0729
1153	TM6SF2	11	3082	0.0036	14	8172	0.0017	case	0.0729
1154	FARSB	19	3074	0.0061	29	8157	0.0035	case	0.0731
1155	MRPL44	19	3074	0.0061	29	8157	0.0035	case	0.0731
1156	ESRP2	19	3074	0.0061	29	8157	0.0035	case	0.0731
1157	ZNF430	19	3074	0.0061	29	8157	0.0035	case	0.0731
1158	DDX23	19	3074	0.0061	29	8157	0.0035	case	0.0731
1159	LRRC32	25	3068	0.0081	42	8144	0.0051	case	0.0745
1160	AP2A2	25	3068	0.0081	42	8144	0.0051	case	0.0745
1161	ZFAND4	25	3068	0.0081	42	8144	0.0051	case	0.0745
1162	SNTG2	25	3068	0.0081	42	8144	0.0051	case	0.0745
1163	ANKS3	17	3076	0.0055	73	8113	0.0089	ctrl	0.075
1164	ZC4H2	2	3091	0.0006466	0	8186	0	case	0.0752
1165	PLK5	2	3091	0.0006466	0	8186	0	case	0.0752
1166	C1orf115	2	3091	0.0006466	0	8186	0	case	0.0752
1167	BEX4	2	3091	0.0006466	0	8186	0	case	0.0752
1168	RAB6C	2	3091	0.0006466	0	8186	0	case	0.0752
1169	C7orf73	2	3091	0.0006466	0	8186	0	case	0.0752
1170	C7orf60	2	3091	0.0006466	0	8186	0	case	0.0752
1171	SNAP25	2	3091	0.0006466	0	8186	0	case	0.0752
1172	NPIPA5	2	3091	0.0006466	0	8186	0	case	0.0752
1173	DEFB127	2	3091	0.0006466	0	8186	0	case	0.0752
1174	OR2A4	2	3091	0.0006466	0	8186	0	case	0.0752
1175	C5orf64	2	3091	0.0006466	0	8186	0	case	0.0752
1176	RGS1	2	3091	0.0006466	0	8186	0	case	0.0752
1177	C2orf82	2	3091	0.0006466	0	8186	0	case	0.0752
1178	KCNIP3	14	3079	0.0045	19	8167	0.0023	case	0.0759
1179	EHMT2	14	3079	0.0045	19	8167	0.0023	case	0.0759
1180	SYNE4	14	3079	0.0045	19	8167	0.0023	case	0.0759
1181	LONRF2	14	3079	0.0045	19	8167	0.0023	case	0.0759
1182	KATNA1	14	3079	0.0045	19	8167	0.0023	case	0.0759
1183	TRAM1L1	14	3079	0.0045	19	8167	0.0023	case	0.0759
1184	STARD8	12	3081	0.0039	56	8130	0.0068	ctrl	0.0763
1185	RNF219	12	3081	0.0039	56	8130	0.0068	ctrl	0.0763
1186	DZIP1	12	3081	0.0039	56	8130	0.0068	ctrl	0.0763
1187	CNTN3	12	3081	0.0039	56	8130	0.0068	ctrl	0.0763
1188	LRP12	12	3081	0.0039	56	8130	0.0068	ctrl	0.0763
1189	TXNDC11	37	3056	0.012	67	8119	0.0082	case	0.0764
1190	HID1	22	3071	0.0071	36	8150	0.0044	case	0.0773
1191	SERPINI1	16	3077	0.0052	24	8162	0.0029	case	0.0779
1192	TBX3	16	3077	0.0052	24	8162	0.0029	case	0.0779
1193	SLC4A4	16	3077	0.0052	24	8162	0.0029	case	0.0779
1194	ZBTB17	16	3077	0.0052	24	8162	0.0029	case	0.0779
1195	MYO1G	33	3060	0.0107	59	8127	0.0072	case	0.0779
1196	TET2	33	3060	0.0107	59	8127	0.0072	case	0.0779
1197	COL11A1	41	3052	0.0133	77	8109	0.0094	case	0.078
1198	PMM1	6	3087	0.0019	35	8151	0.0043	ctrl	0.0784
1199	OSGEP	6	3087	0.0019	35	8151	0.0043	ctrl	0.0784
1200	DYM	6	3087	0.0019	35	8151	0.0043	ctrl	0.0784
1201	ZNF354A	6	3087	0.0019	35	8151	0.0043	ctrl	0.0784
1202	OXSM	6	3087	0.0019	35	8151	0.0043	ctrl	0.0784
1203	GPAT2	6	3087	0.0019	35	8151	0.0043	ctrl	0.0784
1204	ZNF710	6	3087	0.0019	35	8151	0.0043	ctrl	0.0784
1205	CTNND2	37	3056	0.012	68	8118	0.0083	case	0.0785
1206	NPHP3	31	3062	0.01	118	8068	0.0144	ctrl	0.0786
1207	FHOD3	31	3062	0.01	118	8068	0.0144	ctrl	0.0786
1208	ANKRD2	3	3090	0.0009699	23	8163	0.0028	ctrl	0.0787
1209	PCDH11X	3	3090	0.0009699	23	8163	0.0028	ctrl	0.0787
1210	RERGL	3	3090	0.0009699	23	8163	0.0028	ctrl	0.0787
1211	PRDX1	3	3090	0.0009699	23	8163	0.0028	ctrl	0.0787
1212	EXO5	3	3090	0.0009699	23	8163	0.0028	ctrl	0.0787
1213	NABP1	3	3090	0.0009699	23	8163	0.0028	ctrl	0.0787
1214	ODF3L2	3	3090	0.0009699	23	8163	0.0028	ctrl	0.0787
1215	MTRF1L	3	3090	0.0009699	23	8163	0.0028	ctrl	0.0787
1216	TMEM79	19	3074	0.0061	30	8156	0.0037	case	0.0787
1217	ZSCAN25	19	3074	0.0061	30	8156	0.0037	case	0.0787
1218	FAM86A	19	3074	0.0061	30	8156	0.0037	case	0.0787
1219	EXOSC10	29	3064	0.0094	51	8135	0.0062	case	0.0791
1220	SLC22A2	26	3067	0.0084	44	8142	0.0054	case	0.0798
1221	FNDC7	26	3067	0.0084	44	8142	0.0054	case	0.0798
1222	BRPF3	15	3078	0.0048	66	8120	0.0081	ctrl	0.0798
1223	CSMD2	54	3039	0.0175	188	7998	0.023	ctrl	0.0802
1224	NOP9	10	3083	0.0032	50	8136	0.0061	ctrl	0.0802
1225	IL18RAP	10	3083	0.0032	50	8136	0.0061	ctrl	0.0802
1226	KIF16B	21	3072	0.0068	85	8101	0.0104	ctrl	0.0806
1227	ZDHHC23	3	3090	0.0009699	24	8162	0.0029	ctrl	0.0808
1228	NOL4	3	3090	0.0009699	24	8162	0.0029	ctrl	0.0808
1229	HMBS	3	3090	0.0009699	24	8162	0.0029	ctrl	0.0808
1230	NRXN2	21	3072	0.0068	86	8100	0.0105	ctrl	0.0809
1231	HIPK1	30	3063	0.0097	52	8134	0.0064	case	0.0809
1232	HOGA1	17	3076	0.0055	25	8161	0.0031	case	0.081
1233	C1QTNF1	17	3076	0.0055	25	8161	0.0031	case	0.081
1234	ZC3H3	18	3075	0.0058	76	8110	0.0093	ctrl	0.0811
1235	IP6K3	20	3073	0.0065	31	8155	0.0038	case	0.0818
1236	C6orf1	6	3087	0.0019	5	8181	0.0006108	case	0.0818
1237	ATP1B1	6	3087	0.0019	5	8181	0.0006108	case	0.0818
1238	GPIHBP1	6	3087	0.0019	5	8181	0.0006108	case	0.0818
1239	MYLPF	6	3087	0.0019	5	8181	0.0006108	case	0.0818
1240	PXT1	6	3087	0.0019	5	8181	0.0006108	case	0.0818
1241	RP9	6	3087	0.0019	5	8181	0.0006108	case	0.0818
1242	TFF1	6	3087	0.0019	5	8181	0.0006108	case	0.0818
1243	RPL36AL	6	3087	0.0019	5	8181	0.0006108	case	0.0818
1244	OR8B12	6	3087	0.0019	5	8181	0.0006108	case	0.0818
1245	ALKBH6	6	3087	0.0019	5	8181	0.0006108	case	0.0818
1246	TRIM43	6	3087	0.0019	5	8181	0.0006108	case	0.0818
1247	C16orf93	6	3087	0.0019	5	8181	0.0006108	case	0.0818
1248	HNRNPC	6	3087	0.0019	5	8181	0.0006108	case	0.0818
1249	IFI27L2	6	3087	0.0019	5	8181	0.0006108	case	0.0818
1250	CHIC1	6	3087	0.0019	5	8181	0.0006108	case	0.0818
1251	MYH14	36	3057	0.0116	133	8053	0.0162	ctrl	0.0819
1252	USP19	34	3059	0.011	61	8125	0.0075	case	0.0823
1253	SERPINH1	14	3079	0.0045	20	8166	0.0024	case	0.0829
1254	CWC25	14	3079	0.0045	20	8166	0.0024	case	0.0829
1255	ST6GAL2	14	3079	0.0045	20	8166	0.0024	case	0.0829
1256	APBA3	14	3079	0.0045	20	8166	0.0024	case	0.0829
1257	SLC6A6	14	3079	0.0045	20	8166	0.0024	case	0.0829
1258	ZNF454	14	3079	0.0045	20	8166	0.0024	case	0.0829
1259	COL28A1	23	3070	0.0074	38	8148	0.0046	case	0.0834
1260	SLC26A1	23	3070	0.0074	38	8148	0.0046	case	0.0834
1261	UNC5A	23	3070	0.0074	38	8148	0.0046	case	0.0834
1262	ZNF653	23	3070	0.0074	38	8148	0.0046	case	0.0834
1263	NEDD4	42	3051	0.0136	80	8106	0.0098	case	0.0835
1264	CLN8	9	3084	0.0029	11	8175	0.0013	case	0.0836
1265	SPRYD3	9	3084	0.0029	11	8175	0.0013	case	0.0836
1266	SLC25A43	9	3084	0.0029	11	8175	0.0013	case	0.0836
1267	TAF7	9	3084	0.0029	11	8175	0.0013	case	0.0836
1268	CENPI	9	3084	0.0029	11	8175	0.0013	case	0.0836
1269	CST1	9	3084	0.0029	11	8175	0.0013	case	0.0836
1270	CADM1	9	3084	0.0029	11	8175	0.0013	case	0.0836
1271	TESC	9	3084	0.0029	11	8175	0.0013	case	0.0836
1272	ABHD10	9	3084	0.0029	11	8175	0.0013	case	0.0836
1273	ADIPOR2	9	3084	0.0029	11	8175	0.0013	case	0.0836
1274	COPS3	9	3084	0.0029	11	8175	0.0013	case	0.0836
1275	SNRPB	9	3084	0.0029	11	8175	0.0013	case	0.0836
1276	LY6E	9	3084	0.0029	11	8175	0.0013	case	0.0836
1277	TMEM184A	9	3084	0.0029	11	8175	0.0013	case	0.0836
1278	MS4A10	9	3084	0.0029	11	8175	0.0013	case	0.0836
1279	GNB2	9	3084	0.0029	11	8175	0.0013	case	0.0836
1280	XIRP2	41	3052	0.0133	147	8039	0.018	ctrl	0.0838
1281	AKAP8	26	3067	0.0084	45	8141	0.0055	case	0.084
1282	ITPKB	26	3067	0.0084	45	8141	0.0055	case	0.084
1283	PDE4A	26	3067	0.0084	45	8141	0.0055	case	0.084
1284	KIAA1841	26	3067	0.0084	45	8141	0.0055	case	0.084
1285	ZNF836	26	3067	0.0084	45	8141	0.0055	case	0.084
1286	ABCF3	26	3067	0.0084	45	8141	0.0055	case	0.084
1287	GCG	1	3092	0.0003233	14	8172	0.0017	ctrl	0.0842
1288	PLA2G2F	1	3092	0.0003233	14	8172	0.0017	ctrl	0.0842
1289	S100A14	1	3092	0.0003233	14	8172	0.0017	ctrl	0.0842
1290	HRSP12	1	3092	0.0003233	14	8172	0.0017	ctrl	0.0842
1291	GABARAPL2	1	3092	0.0003233	14	8172	0.0017	ctrl	0.0842
1292	HMGB2	1	3092	0.0003233	14	8172	0.0017	ctrl	0.0842
1293	TCEB2	1	3092	0.0003233	14	8172	0.0017	ctrl	0.0842
1294	DUSP14	1	3092	0.0003233	14	8172	0.0017	ctrl	0.0842
1295	TAS2R13	1	3092	0.0003233	14	8172	0.0017	ctrl	0.0842
1296	ARID3C	1	3092	0.0003233	14	8172	0.0017	ctrl	0.0842
1297	KCTD11	1	3092	0.0003233	14	8172	0.0017	ctrl	0.0842
1298	PRRX1	1	3092	0.0003233	14	8172	0.0017	ctrl	0.0842
1299	ATP5B	1	3092	0.0003233	14	8172	0.0017	ctrl	0.0842
1300	STK17B	1	3092	0.0003233	14	8172	0.0017	ctrl	0.0842
1301	YBX1	1	3092	0.0003233	14	8172	0.0017	ctrl	0.0842
1302	SSR1	1	3092	0.0003233	14	8172	0.0017	ctrl	0.0842
1303	GFOD1	2	3091	0.0006466	19	8167	0.0023	ctrl	0.0845
1304	KRTAP9-8	2	3091	0.0006466	19	8167	0.0023	ctrl	0.0845
1305	SIGLEC5	2	3091	0.0006466	19	8167	0.0023	ctrl	0.0845
1306	KLHDC1	2	3091	0.0006466	19	8167	0.0023	ctrl	0.0845
1307	ZFP42	2	3091	0.0006466	19	8167	0.0023	ctrl	0.0845
1308	WTIP	2	3091	0.0006466	19	8167	0.0023	ctrl	0.0845
1309	IMPA1	2	3091	0.0006466	19	8167	0.0023	ctrl	0.0845
1310	2019-03-08	2	3091	0.0006466	19	8167	0.0023	ctrl	0.0845
1311	NAPG	2	3091	0.0006466	19	8167	0.0023	ctrl	0.0845
1312	PIGA	2	3091	0.0006466	19	8167	0.0023	ctrl	0.0845
1313	AURKAIP1	2	3091	0.0006466	19	8167	0.0023	ctrl	0.0845
1314	RIF1	37	3056	0.012	136	8050	0.0166	ctrl	0.0854
1315	PTPRZ1	33	3060	0.0107	123	8063	0.015	ctrl	0.0857
1316	PKDREJ	33	3060	0.0107	123	8063	0.015	ctrl	0.0857
1317	AKAP13	62	3031	0.02	211	7975	0.0258	ctrl	0.0858
1318	LBR	20	3073	0.0065	32	8154	0.0039	case	0.0858
1319	DCAF4	20	3073	0.0065	32	8154	0.0039	case	0.0858
1320	JHDM1D	20	3073	0.0065	32	8154	0.0039	case	0.0858
1321	PIGW	20	3073	0.0065	32	8154	0.0039	case	0.0858
1322	FRAS1	74	3019	0.0239	246	7940	0.0301	ctrl	0.086
1323	ART3	17	3076	0.0055	26	8160	0.0032	case	0.0862
1324	FDXR	17	3076	0.0055	26	8160	0.0032	case	0.0862
1325	ZNF236	43	3050	0.0139	82	8104	0.01	case	0.0864
1326	HKDC1	22	3071	0.0071	89	8097	0.0109	ctrl	0.0864
1327	DGKG	16	3077	0.0052	68	8118	0.0083	ctrl	0.0867
1328	BAI2	16	3077	0.0052	68	8118	0.0083	ctrl	0.0867
1329	PPEF2	19	3074	0.0061	78	8108	0.0095	ctrl	0.0869
1330	AGO2	12	3081	0.0039	16	8170	0.002	case	0.0873
1331	BOLL	12	3081	0.0039	16	8170	0.002	case	0.0873
1332	CADM3	12	3081	0.0039	16	8170	0.002	case	0.0873
1333	KEAP1	12	3081	0.0039	16	8170	0.002	case	0.0873
1334	CNTNAP3	12	3081	0.0039	16	8170	0.002	case	0.0873
1335	INMT	12	3081	0.0039	16	8170	0.002	case	0.0873
1336	OR6K6	12	3081	0.0039	16	8170	0.002	case	0.0873
1337	TRIM44	12	3081	0.0039	16	8170	0.002	case	0.0873
1338	PLCZ1	12	3081	0.0039	16	8170	0.002	case	0.0873
1339	ZNF259	12	3081	0.0039	16	8170	0.002	case	0.0873
1340	TSPYL2	12	3081	0.0039	16	8170	0.002	case	0.0873
1341	CAMTA1	19	3074	0.0061	79	8107	0.0097	ctrl	0.0873
1342	PADI2	19	3074	0.0061	79	8107	0.0097	ctrl	0.0873
1343	ZMYND11	1	3092	0.0003233	15	8171	0.0018	ctrl	0.0874
1344	GPR82	1	3092	0.0003233	15	8171	0.0018	ctrl	0.0874
1345	XIAP	1	3092	0.0003233	15	8171	0.0018	ctrl	0.0874
1346	NME6	1	3092	0.0003233	15	8171	0.0018	ctrl	0.0874
1347	TMEM9B	1	3092	0.0003233	15	8171	0.0018	ctrl	0.0874
1348	MGARP	1	3092	0.0003233	15	8171	0.0018	ctrl	0.0874
1349	HOXD1	1	3092	0.0003233	15	8171	0.0018	ctrl	0.0874
1350	CYTH1	1	3092	0.0003233	15	8171	0.0018	ctrl	0.0874
1351	CTDSP2	1	3092	0.0003233	15	8171	0.0018	ctrl	0.0874
1352	SLIT2	39	3054	0.0126	73	8113	0.0089	case	0.0881
1353	KEL	31	3062	0.01	55	8131	0.0067	case	0.0884
1354	PTCD3	11	3082	0.0036	52	8134	0.0064	ctrl	0.0885
1355	ANKEF1	11	3082	0.0036	52	8134	0.0064	ctrl	0.0885
1356	FNBP4	11	3082	0.0036	52	8134	0.0064	ctrl	0.0885
1357	PIGN	11	3082	0.0036	52	8134	0.0064	ctrl	0.0885
1358	ZNF234	11	3082	0.0036	52	8134	0.0064	ctrl	0.0885
1359	BAI3	11	3082	0.0036	52	8134	0.0064	ctrl	0.0885
1360	CRIPAK	27	3066	0.0087	47	8139	0.0057	case	0.0889
1361	COL9A1	35	3058	0.0113	64	8122	0.0078	case	0.0889
1362	NUP210L	35	3058	0.0113	64	8122	0.0078	case	0.0889
1363	SLC35F6	5	3088	0.0016	30	8156	0.0037	ctrl	0.089
1364	SOCS5	5	3088	0.0016	30	8156	0.0037	ctrl	0.089
1365	ST6GALNAC4	5	3088	0.0016	30	8156	0.0037	ctrl	0.089
1366	LRRC18	5	3088	0.0016	30	8156	0.0037	ctrl	0.089
1367	NMBR	5	3088	0.0016	30	8156	0.0037	ctrl	0.089
1368	ETV6	5	3088	0.0016	30	8156	0.0037	ctrl	0.089
1369	OR52K1	5	3088	0.0016	30	8156	0.0037	ctrl	0.089
1370	IDH1	5	3088	0.0016	30	8156	0.0037	ctrl	0.089
1371	WASF2	5	3088	0.0016	30	8156	0.0037	ctrl	0.089
1372	CRISP1	5	3088	0.0016	30	8156	0.0037	ctrl	0.089
1373	ALKBH1	5	3088	0.0016	30	8156	0.0037	ctrl	0.089
1374	AZGP1	5	3088	0.0016	30	8156	0.0037	ctrl	0.089
1375	PIK3IP1	5	3088	0.0016	30	8156	0.0037	ctrl	0.089
1376	IFNA21	10	3083	0.0032	12	8174	0.0015	case	0.0898
1377	OPCML	10	3083	0.0032	12	8174	0.0015	case	0.0898
1378	RFWD2	10	3083	0.0032	12	8174	0.0015	case	0.0898
1379	CYR61	10	3083	0.0032	12	8174	0.0015	case	0.0898
1380	EFNB2	10	3083	0.0032	12	8174	0.0015	case	0.0898
1381	PELI3	10	3083	0.0032	12	8174	0.0015	case	0.0898
1382	FMR1	10	3083	0.0032	12	8174	0.0015	case	0.0898
1383	DEPDC4	5	3088	0.0016	31	8155	0.0038	ctrl	0.0901
1384	CAND1	5	3088	0.0016	31	8155	0.0038	ctrl	0.0901
1385	GJB4	5	3088	0.0016	31	8155	0.0038	ctrl	0.0901
1386	ALDH4A1	24	3069	0.0078	40	8146	0.0049	case	0.0904
1387	FLT3	24	3069	0.0078	40	8146	0.0049	case	0.0904
1388	TENC1	39	3054	0.0126	74	8112	0.009	case	0.0909
1389	FANCG	9	3084	0.0029	44	8142	0.0054	ctrl	0.0914
1390	ACTN4	9	3084	0.0029	44	8142	0.0054	ctrl	0.0914
1391	MLLT3	9	3084	0.0029	44	8142	0.0054	ctrl	0.0914
1392	DPYSL4	9	3084	0.0029	44	8142	0.0054	ctrl	0.0914
1393	DGKA	9	3084	0.0029	44	8142	0.0054	ctrl	0.0914
1394	CCAR1	9	3084	0.0029	45	8141	0.0055	ctrl	0.0916
1395	PLA2G4C	9	3084	0.0029	45	8141	0.0055	ctrl	0.0916
1396	LRP5	44	3049	0.0142	85	8101	0.0104	case	0.0917
1397	RANBP17	35	3058	0.0113	65	8121	0.0079	case	0.0918
1398	C8A	7	3086	0.0023	37	8149	0.0045	ctrl	0.0921
1399	SLC38A9	7	3086	0.0023	37	8149	0.0045	ctrl	0.0921
1400	CCDC61	7	3086	0.0023	37	8149	0.0045	ctrl	0.0921
1401	OR7D2	7	3086	0.0023	37	8149	0.0045	ctrl	0.0921
1402	TBC1D23	7	3086	0.0023	37	8149	0.0045	ctrl	0.0921
1403	HINFP	7	3086	0.0023	37	8149	0.0045	ctrl	0.0921
1404	ACTL7B	7	3086	0.0023	38	8148	0.0046	ctrl	0.0926
1405	GSDMD	7	3086	0.0023	38	8148	0.0046	ctrl	0.0926
1406	TMEM206	7	3086	0.0023	38	8148	0.0046	ctrl	0.0926
1407	PLEKHM3	7	3086	0.0023	38	8148	0.0046	ctrl	0.0926
1408	METTL15	7	3086	0.0023	38	8148	0.0046	ctrl	0.0926
1409	SLC27A3	14	3079	0.0045	62	8124	0.0076	ctrl	0.0927
1410	SLC9C1	14	3079	0.0045	62	8124	0.0076	ctrl	0.0927
1411	CC2D1B	14	3079	0.0045	62	8124	0.0076	ctrl	0.0927
1412	OGDHL	20	3073	0.0065	81	8105	0.0099	ctrl	0.0928
1413	EXO1	20	3073	0.0065	81	8105	0.0099	ctrl	0.0928
1414	CIZ1	21	3072	0.0068	34	8152	0.0042	case	0.094
1415	NFXL1	21	3072	0.0068	34	8152	0.0042	case	0.094
1416	ATXN7	17	3076	0.0055	72	8114	0.0088	ctrl	0.0941
1417	NEO1	40	3053	0.0129	76	8110	0.0093	case	0.0941
1418	ERBB3	40	3053	0.0129	76	8110	0.0093	case	0.0941
1419	GAMT	15	3078	0.0048	22	8164	0.0027	case	0.0946
1420	ZNF737	15	3078	0.0048	22	8164	0.0027	case	0.0946
1421	PCOLCE	15	3078	0.0048	22	8164	0.0027	case	0.0946
1422	GMNC	15	3078	0.0048	22	8164	0.0027	case	0.0946
1423	TADA2A	15	3078	0.0048	22	8164	0.0027	case	0.0946
1424	FNDC3A	28	3065	0.0091	49	8137	0.006	case	0.0946
1425	ITGA9	28	3065	0.0091	49	8137	0.006	case	0.0946
1426	MGA	55	3038	0.0178	110	8076	0.0134	case	0.0946
1427	HDAC8	4	3089	0.0013	3	8183	0.0003665	case	0.095
1428	C6orf62	4	3089	0.0013	3	8183	0.0003665	case	0.095
1429	C3orf35	4	3089	0.0013	3	8183	0.0003665	case	0.095
1430	RPL23	4	3089	0.0013	3	8183	0.0003665	case	0.095
1431	POMP	4	3089	0.0013	3	8183	0.0003665	case	0.095
1432	RPP25	4	3089	0.0013	3	8183	0.0003665	case	0.095
1433	ANAPC13	4	3089	0.0013	3	8183	0.0003665	case	0.095
1434	C10orf53	4	3089	0.0013	3	8183	0.0003665	case	0.095
1435	C10orf91	4	3089	0.0013	3	8183	0.0003665	case	0.095
1436	C1QL1	4	3089	0.0013	3	8183	0.0003665	case	0.095
1437	MAPRE1	4	3089	0.0013	3	8183	0.0003665	case	0.095
1438	SMLR1	4	3089	0.0013	3	8183	0.0003665	case	0.095
1439	GCLM	4	3089	0.0013	3	8183	0.0003665	case	0.095
1440	RHEBL1	4	3089	0.0013	3	8183	0.0003665	case	0.095
1441	VDAC1	4	3089	0.0013	3	8183	0.0003665	case	0.095
1442	PHYHIP	4	3089	0.0013	3	8183	0.0003665	case	0.095
1443	PHF6	4	3089	0.0013	3	8183	0.0003665	case	0.095
1444	C9orf57	4	3089	0.0013	3	8183	0.0003665	case	0.095
1445	CTC1	36	3057	0.0116	67	8119	0.0082	case	0.0956
1446	SSH2	36	3057	0.0116	67	8119	0.0082	case	0.0956
1447	OCSTAMP	18	3075	0.0058	28	8158	0.0034	case	0.0959
1448	UAP1L1	18	3075	0.0058	28	8158	0.0034	case	0.0959
1449	ZNF254	18	3075	0.0058	28	8158	0.0034	case	0.0959
1450	TGFBR3	18	3075	0.0058	28	8158	0.0034	case	0.0959
1451	ITGA2B	32	3061	0.0103	58	8128	0.0071	case	0.096
1452	BLM	24	3069	0.0078	94	8092	0.0115	ctrl	0.0964
1453	ABCC8	45	3048	0.0145	88	8098	0.0108	case	0.0972
1454	ITGA7	32	3061	0.0103	118	8068	0.0144	ctrl	0.0975
1455	ZWILCH	12	3081	0.0039	54	8132	0.0066	ctrl	0.0978
1456	KPNA7	12	3081	0.0039	54	8132	0.0066	ctrl	0.0978
1457	RNF6	12	3081	0.0039	54	8132	0.0066	ctrl	0.0978
1458	TEPP	12	3081	0.0039	17	8169	0.0021	case	0.0978
1459	P2RX4	12	3081	0.0039	17	8169	0.0021	case	0.0978
1460	XRCC5	12	3081	0.0039	17	8169	0.0021	case	0.0978
1461	ZNF843	12	3081	0.0039	17	8169	0.0021	case	0.0978
1462	TRIP13	12	3081	0.0039	17	8169	0.0021	case	0.0978
1463	AK1	12	3081	0.0039	17	8169	0.0021	case	0.0978
1464	RPL14	8	3085	0.0026	9	8177	0.0011	case	0.098
1465	RPL13	8	3085	0.0026	9	8177	0.0011	case	0.098
1466	NANOS3	8	3085	0.0026	9	8177	0.0011	case	0.098
1467	AP3S2	8	3085	0.0026	9	8177	0.0011	case	0.098
1468	GTF2A1	8	3085	0.0026	9	8177	0.0011	case	0.098
1469	NOL7	8	3085	0.0026	9	8177	0.0011	case	0.098
1470	ARHGDIB	8	3085	0.0026	9	8177	0.0011	case	0.098
1471	OR14C36	8	3085	0.0026	9	8177	0.0011	case	0.098
1472	HOMER3	8	3085	0.0026	9	8177	0.0011	case	0.098
1473	PSMD13	8	3085	0.0026	9	8177	0.0011	case	0.098
1474	TOMM34	8	3085	0.0026	9	8177	0.0011	case	0.098
1475	MAP1LC3C	8	3085	0.0026	9	8177	0.0011	case	0.098
1476	SPATA7	28	3065	0.0091	50	8136	0.0061	case	0.0982
1477	SLC34A3	21	3072	0.0068	35	8151	0.0043	case	0.0987
1478	LHCGR	21	3072	0.0068	35	8151	0.0043	case	0.0987
1479	SLK	21	3072	0.0068	35	8151	0.0043	case	0.0987
1480	CNNM4	21	3072	0.0068	35	8151	0.0043	case	0.0987
1481	TRIM47	21	3072	0.0068	35	8151	0.0043	case	0.0987
1482	FAM135A	36	3057	0.0116	68	8118	0.0083	case	0.0989
1483	TLL2	36	3057	0.0116	68	8118	0.0083	case	0.0989
1484	GNPTAB	32	3061	0.0103	59	8127	0.0072	case	0.0994
1485	RALGAPB	32	3061	0.0103	59	8127	0.0072	case	0.0994
1486	NCOA1	41	3052	0.0133	79	8107	0.0097	case	0.1001
1487	JAG1	15	3078	0.0048	64	8122	0.0078	ctrl	0.1002
1488	ARHGEF1	15	3078	0.0048	64	8122	0.0078	ctrl	0.1002
1489	SLC26A11	15	3078	0.0048	64	8122	0.0078	ctrl	0.1002
1490	POMT1	15	3078	0.0048	64	8122	0.0078	ctrl	0.1002
1491	TSHZ1	18	3075	0.0058	74	8112	0.009	ctrl	0.1003
1492	PTK2B	18	3075	0.0058	74	8112	0.009	ctrl	0.1003
1493	GPR171	10	3083	0.0032	13	8173	0.0016	case	0.1005
1494	SOWAHC	10	3083	0.0032	13	8173	0.0016	case	0.1005
1495	SRPX2	10	3083	0.0032	13	8173	0.0016	case	0.1005
1496	FAM169B	10	3083	0.0032	13	8173	0.0016	case	0.1005
1497	P2RY4	10	3083	0.0032	13	8173	0.0016	case	0.1005
1498	MYCN	10	3083	0.0032	13	8173	0.0016	case	0.1005
1499	EDIL3	10	3083	0.0032	13	8173	0.0016	case	0.1005
1500	RGS7	10	3083	0.0032	13	8173	0.0016	case	0.1005
1501	PSMD12	10	3083	0.0032	13	8173	0.0016	case	0.1005
1502	RFPL4B	10	3083	0.0032	13	8173	0.0016	case	0.1005
1503	C6orf211	10	3083	0.0032	13	8173	0.0016	case	0.1005
1504	TPM3	10	3083	0.0032	13	8173	0.0016	case	0.1005
1505	SNX4	10	3083	0.0032	13	8173	0.0016	case	0.1005
1506	DGCR2	25	3068	0.0081	43	8143	0.0053	case	0.1007
1507	FAM90A1	4	3089	0.0013	26	8160	0.0032	ctrl	0.1007
1508	DHDDS	4	3089	0.0013	26	8160	0.0032	ctrl	0.1007
1509	TREX1	4	3089	0.0013	26	8160	0.0032	ctrl	0.1007
1510	EXOC6B	4	3089	0.0013	26	8160	0.0032	ctrl	0.1007
1511	LRRC52	4	3089	0.0013	26	8160	0.0032	ctrl	0.1007
1512	DYNC1LI2	4	3089	0.0013	26	8160	0.0032	ctrl	0.1007
1513	IYD	4	3089	0.0013	26	8160	0.0032	ctrl	0.1007
1514	OR52I1	4	3089	0.0013	26	8160	0.0032	ctrl	0.1007
1515	ETV3L	4	3089	0.0013	26	8160	0.0032	ctrl	0.1007
1516	VCAM1	4	3089	0.0013	26	8160	0.0032	ctrl	0.1007
1517	ING1	4	3089	0.0013	26	8160	0.0032	ctrl	0.1007
1518	GPBP1	4	3089	0.0013	26	8160	0.0032	ctrl	0.1007
1519	FITM1	4	3089	0.0013	26	8160	0.0032	ctrl	0.1007
1520	OR10A7	4	3089	0.0013	26	8160	0.0032	ctrl	0.1007
1521	SLC2A5	4	3089	0.0013	26	8160	0.0032	ctrl	0.1007
1522	LARP1B	15	3078	0.0048	65	8121	0.0079	ctrl	0.1011
1523	USP53	15	3078	0.0048	65	8121	0.0079	ctrl	0.1011
1524	ARID2	15	3078	0.0048	65	8121	0.0079	ctrl	0.1011
1525	RSPH6A	15	3078	0.0048	65	8121	0.0079	ctrl	0.1011
1526	HABP2	33	3060	0.0107	60	8126	0.0073	case	0.1013
1527	LGSN	18	3075	0.0058	29	8157	0.0035	case	0.1019
1528	TES	18	3075	0.0058	29	8157	0.0035	case	0.1019
1529	IL10RA	18	3075	0.0058	29	8157	0.0035	case	0.1019
1530	MTMR6	18	3075	0.0058	29	8157	0.0035	case	0.1019
1531	ATP10B	25	3068	0.0081	97	8089	0.0118	ctrl	0.1019
1532	ANKRD27	29	3064	0.0094	109	8077	0.0133	ctrl	0.1023
1533	VAX2	15	3078	0.0048	23	8163	0.0028	case	0.1024
1534	CCDC7	15	3078	0.0048	23	8163	0.0028	case	0.1024
1535	LIPA	15	3078	0.0048	23	8163	0.0028	case	0.1024
1536	ANGPTL2	15	3078	0.0048	23	8163	0.0028	case	0.1024
1537	UBAC1	15	3078	0.0048	23	8163	0.0028	case	0.1024
1538	CD248	15	3078	0.0048	23	8163	0.0028	case	0.1024
1539	OXGR1	15	3078	0.0048	23	8163	0.0028	case	0.1024
1540	CYP2J2	15	3078	0.0048	23	8163	0.0028	case	0.1024
1541	STAR	15	3078	0.0048	23	8163	0.0028	case	0.1024
1542	ALPI	10	3083	0.0032	47	8139	0.0057	ctrl	0.1024
1543	SP1	10	3083	0.0032	47	8139	0.0057	ctrl	0.1024
1544	OPRM1	10	3083	0.0032	47	8139	0.0057	ctrl	0.1024
1545	TTC31	10	3083	0.0032	47	8139	0.0057	ctrl	0.1024
1546	SLC5A9	10	3083	0.0032	47	8139	0.0057	ctrl	0.1024
1547	ELF5	6	3087	0.0019	6	8180	0.000733	case	0.1025
1548	EIF4E	6	3087	0.0019	6	8180	0.000733	case	0.1025
1549	HNRNPDL	6	3087	0.0019	6	8180	0.000733	case	0.1025
1550	JAZF1	6	3087	0.0019	6	8180	0.000733	case	0.1025
1551	SPSB4	6	3087	0.0019	6	8180	0.000733	case	0.1025
1552	KRTAP3-1	6	3087	0.0019	6	8180	0.000733	case	0.1025
1553	FXYD7	6	3087	0.0019	6	8180	0.000733	case	0.1025
1554	STAT1	6	3087	0.0019	6	8180	0.000733	case	0.1025
1555	LYSMD2	6	3087	0.0019	6	8180	0.000733	case	0.1025
1556	TOB2	6	3087	0.0019	6	8180	0.000733	case	0.1025
1557	OR8U1	6	3087	0.0019	6	8180	0.000733	case	0.1025
1558	C2orf70	6	3087	0.0019	6	8180	0.000733	case	0.1025
1559	GM2A	6	3087	0.0019	6	8180	0.000733	case	0.1025
1560	LCE1F	6	3087	0.0019	6	8180	0.000733	case	0.1025
1561	BAG2	6	3087	0.0019	6	8180	0.000733	case	0.1025
1562	CLEC2L	6	3087	0.0019	6	8180	0.000733	case	0.1025
1563	PBRM1	37	3056	0.012	70	8116	0.0086	case	0.1025
1564	OIT3	10	3083	0.0032	48	8138	0.0059	ctrl	0.1033
1565	DNTT	10	3083	0.0032	48	8138	0.0059	ctrl	0.1033
1566	RHO	10	3083	0.0032	48	8138	0.0059	ctrl	0.1033
1567	MYSM1	10	3083	0.0032	48	8138	0.0059	ctrl	0.1033
1568	SLCO4C1	10	3083	0.0032	48	8138	0.0059	ctrl	0.1033
1569	ARFGAP3	10	3083	0.0032	48	8138	0.0059	ctrl	0.1033
1570	USP8	10	3083	0.0032	48	8138	0.0059	ctrl	0.1033
1571	XRRA1	29	3064	0.0094	52	8134	0.0064	case	0.1035
1572	KDM3B	29	3064	0.0094	52	8134	0.0064	case	0.1035
1573	SIRT2	13	3080	0.0042	18	8168	0.0022	case	0.1039
1574	CCDC42	13	3080	0.0042	18	8168	0.0022	case	0.1039
1575	CYP27B1	13	3080	0.0042	18	8168	0.0022	case	0.1039
1576	TP53I3	13	3080	0.0042	18	8168	0.0022	case	0.1039
1577	SUMF1	13	3080	0.0042	18	8168	0.0022	case	0.1039
1578	WISP1	13	3080	0.0042	18	8168	0.0022	case	0.1039
1579	TGFB1I1	13	3080	0.0042	18	8168	0.0022	case	0.1039
1580	MSMO1	13	3080	0.0042	18	8168	0.0022	case	0.1039
1581	ABCA4	76	3017	0.0246	160	8026	0.0195	case	0.1046
1582	MEGF8	43	3050	0.0139	152	8034	0.0186	ctrl	0.105
1583	GPR158	8	3085	0.0026	40	8146	0.0049	ctrl	0.1056
1584	TSSC4	8	3085	0.0026	40	8146	0.0049	ctrl	0.1056
1585	PCDHB13	8	3085	0.0026	40	8146	0.0049	ctrl	0.1056
1586	KIAA1279	8	3085	0.0026	40	8146	0.0049	ctrl	0.1056
1587	NGDN	6	3087	0.0019	33	8153	0.004	ctrl	0.1059
1588	BRSK1	6	3087	0.0019	33	8153	0.004	ctrl	0.1059
1589	ZDHHC7	6	3087	0.0019	33	8153	0.004	ctrl	0.1059
1590	CCM2L	6	3087	0.0019	33	8153	0.004	ctrl	0.1059
1591	KRIT1	6	3087	0.0019	33	8153	0.004	ctrl	0.1059
1592	PLEKHO1	6	3087	0.0019	33	8153	0.004	ctrl	0.1059
1593	OR7A5	6	3087	0.0019	33	8153	0.004	ctrl	0.1059
1594	ZNF320	6	3087	0.0019	33	8153	0.004	ctrl	0.1059
1595	HSF4	6	3087	0.0019	33	8153	0.004	ctrl	0.1059
1596	ABR	6	3087	0.0019	33	8153	0.004	ctrl	0.1059
1597	XPNPEP2	22	3071	0.0071	37	8149	0.0045	case	0.1064
1598	SASS6	22	3071	0.0071	37	8149	0.0045	case	0.1064
1599	ESYT2	22	3071	0.0071	37	8149	0.0045	case	0.1064
1600	GLDC	26	3067	0.0084	99	8087	0.0121	ctrl	0.1065
1601	MCOLN2	8	3085	0.0026	41	8145	0.005	ctrl	0.1069
1602	POLA1	8	3085	0.0026	41	8145	0.005	ctrl	0.1069
1603	FBXO34	13	3080	0.0042	57	8129	0.007	ctrl	0.107
1604	PMS2	13	3080	0.0042	57	8129	0.007	ctrl	0.107
1605	TTLL2	13	3080	0.0042	57	8129	0.007	ctrl	0.107
1606	CNGA3	13	3080	0.0042	57	8129	0.007	ctrl	0.107
1607	CEP63	13	3080	0.0042	57	8129	0.007	ctrl	0.107
1608	ZNF180	13	3080	0.0042	57	8129	0.007	ctrl	0.107
1609	PALB2	19	3074	0.0061	77	8109	0.0094	ctrl	0.1072
1610	SAFB2	29	3064	0.0094	53	8133	0.0065	case	0.1075
1611	C2orf16	29	3064	0.0094	53	8133	0.0065	case	0.1075
1612	KY	6	3087	0.0019	34	8152	0.0042	ctrl	0.1079
1613	OR4C13	6	3087	0.0019	34	8152	0.0042	ctrl	0.1079
1614	AKR1C3	6	3087	0.0019	34	8152	0.0042	ctrl	0.1079
1615	C7orf63	6	3087	0.0019	34	8152	0.0042	ctrl	0.1079
1616	TMEM87B	6	3087	0.0019	34	8152	0.0042	ctrl	0.1079
1617	HOOK3	6	3087	0.0019	34	8152	0.0042	ctrl	0.1079
1618	GPRASP2	6	3087	0.0019	34	8152	0.0042	ctrl	0.1079
1619	PALM	6	3087	0.0019	34	8152	0.0042	ctrl	0.1079
1620	ZNF569	6	3087	0.0019	34	8152	0.0042	ctrl	0.1079
1621	AFP	6	3087	0.0019	34	8152	0.0042	ctrl	0.1079
1622	TCF12	13	3080	0.0042	58	8128	0.0071	ctrl	0.1081
1623	PCDH9	13	3080	0.0042	58	8128	0.0071	ctrl	0.1081
1624	XPC	16	3077	0.0052	67	8119	0.0082	ctrl	0.1082
1625	PLEKHA4	16	3077	0.0052	67	8119	0.0082	ctrl	0.1082
1626	POLG	43	3050	0.0139	84	8102	0.0103	case	0.1095
1627	USP31	30	3063	0.0097	54	8132	0.0066	case	0.1095
1628	IQGAP3	35	3058	0.0113	127	8059	0.0155	ctrl	0.1099
1629	LRP2	81	3012	0.0262	262	7924	0.032	ctrl	0.1104
1630	ATP10D	23	3070	0.0074	89	8097	0.0109	ctrl	0.1104
1631	TCOF1	23	3070	0.0074	89	8097	0.0109	ctrl	0.1104
1632	COL11A2	19	3074	0.0061	31	8155	0.0038	case	0.1109
1633	IL1RAP	19	3074	0.0061	31	8155	0.0038	case	0.1109
1634	ARNT	19	3074	0.0061	31	8155	0.0038	case	0.1109
1635	SNX21	19	3074	0.0061	31	8155	0.0038	case	0.1109
1636	ARHGEF33	19	3074	0.0061	31	8155	0.0038	case	0.1109
1637	KRT36	19	3074	0.0061	31	8155	0.0038	case	0.1109
1638	SCYL3	19	3074	0.0061	31	8155	0.0038	case	0.1109
1639	LIMCH1	26	3067	0.0084	46	8140	0.0056	case	0.1111
1640	SLC12A8	26	3067	0.0084	46	8140	0.0056	case	0.1111
1641	BICD1	26	3067	0.0084	46	8140	0.0056	case	0.1111
1642	PCDH10	26	3067	0.0084	46	8140	0.0056	case	0.1111
1643	ALPK1	23	3070	0.0074	90	8096	0.011	ctrl	0.1112
1644	RNF26	13	3080	0.0042	19	8167	0.0023	case	0.1112
1645	GRAMD2	13	3080	0.0042	19	8167	0.0023	case	0.1112
1646	LZTS3	13	3080	0.0042	19	8167	0.0023	case	0.1112
1647	TALDO1	13	3080	0.0042	19	8167	0.0023	case	0.1112
1648	KCNMB1	13	3080	0.0042	19	8167	0.0023	case	0.1112
1649	SGCG	13	3080	0.0042	19	8167	0.0023	case	0.1112
1650	VRK1	13	3080	0.0042	19	8167	0.0023	case	0.1112
1651	PPM1M	13	3080	0.0042	19	8167	0.0023	case	0.1112
1652	OR7G1	13	3080	0.0042	19	8167	0.0023	case	0.1112
1653	PIH1D2	13	3080	0.0042	19	8167	0.0023	case	0.1112
1654	KRT28	13	3080	0.0042	19	8167	0.0023	case	0.1112
1655	WDR59	34	3059	0.011	64	8122	0.0078	case	0.1116
1656	COL20A1	27	3066	0.0087	101	8085	0.0123	ctrl	0.1116
1657	NELL2	22	3071	0.0071	38	8148	0.0046	case	0.1117
1658	AREL1	22	3071	0.0071	38	8148	0.0046	case	0.1117
1659	KIAA1244	27	3066	0.0087	102	8084	0.0125	ctrl	0.1118
1660	SPTB	66	3027	0.0213	137	8049	0.0167	case	0.112
1661	PREPL	30	3063	0.0097	55	8131	0.0067	case	0.1124
1662	CTDP1	30	3063	0.0097	55	8131	0.0067	case	0.1124
1663	ZNF263	30	3063	0.0097	55	8131	0.0067	case	0.1124
1664	STRC	3	3090	0.0009699	21	8165	0.0026	ctrl	0.113
1665	MC2R	3	3090	0.0009699	21	8165	0.0026	ctrl	0.113
1666	AKR1C2	3	3090	0.0009699	21	8165	0.0026	ctrl	0.113
1667	IGFBP1	3	3090	0.0009699	21	8165	0.0026	ctrl	0.113
1668	SGPP1	3	3090	0.0009699	21	8165	0.0026	ctrl	0.113
1669	ETS2	3	3090	0.0009699	21	8165	0.0026	ctrl	0.113
1670	LIN9	3	3090	0.0009699	21	8165	0.0026	ctrl	0.113
1671	FKBP11	3	3090	0.0009699	21	8165	0.0026	ctrl	0.113
1672	DTX3	3	3090	0.0009699	21	8165	0.0026	ctrl	0.113
1673	SFTPB	3	3090	0.0009699	21	8165	0.0026	ctrl	0.113
1674	LOXL1	3	3090	0.0009699	21	8165	0.0026	ctrl	0.113
1675	TRMT10C	3	3090	0.0009699	21	8165	0.0026	ctrl	0.113
1676	CTSO	3	3090	0.0009699	21	8165	0.0026	ctrl	0.113
1677	FGFR1OP	3	3090	0.0009699	21	8165	0.0026	ctrl	0.113
1678	CD177	3	3090	0.0009699	21	8165	0.0026	ctrl	0.113
1679	CAMK4	3	3090	0.0009699	21	8165	0.0026	ctrl	0.113
1680	PAFAH1B3	3	3090	0.0009699	21	8165	0.0026	ctrl	0.113
1681	NAB2	3	3090	0.0009699	21	8165	0.0026	ctrl	0.113
1682	OR5AN1	3	3090	0.0009699	21	8165	0.0026	ctrl	0.113
1683	DNMT3L	16	3077	0.0052	25	8161	0.0031	case	0.1133
1684	MEPCE	16	3077	0.0052	25	8161	0.0031	case	0.1133
1685	POLR1E	16	3077	0.0052	25	8161	0.0031	case	0.1133
1686	GALNT1	16	3077	0.0052	25	8161	0.0031	case	0.1133
1687	KPTN	16	3077	0.0052	25	8161	0.0031	case	0.1133
1688	TMEM247	16	3077	0.0052	25	8161	0.0031	case	0.1133
1689	TXNDC16	11	3082	0.0036	50	8136	0.0061	ctrl	0.1135
1690	PCSK1	11	3082	0.0036	50	8136	0.0061	ctrl	0.1135
1691	MKS1	11	3082	0.0036	50	8136	0.0061	ctrl	0.1135
1692	DHX32	11	3082	0.0036	50	8136	0.0061	ctrl	0.1135
1693	KRT71	11	3082	0.0036	50	8136	0.0061	ctrl	0.1135
1694	ZNF225	11	3082	0.0036	50	8136	0.0061	ctrl	0.1135
1695	RASGRP3	11	3082	0.0036	50	8136	0.0061	ctrl	0.1135
1696	SLITRK3	20	3073	0.0065	79	8107	0.0097	ctrl	0.1137
1697	VCAN	20	3073	0.0065	79	8107	0.0097	ctrl	0.1137
1698	MISP	20	3073	0.0065	79	8107	0.0097	ctrl	0.1137
1699	NFIA	3	3090	0.0009699	22	8164	0.0027	ctrl	0.1139
1700	SLC39A1	3	3090	0.0009699	22	8164	0.0027	ctrl	0.1139
1701	RENBP	3	3090	0.0009699	22	8164	0.0027	ctrl	0.1139
1702	GTF2E1	3	3090	0.0009699	22	8164	0.0027	ctrl	0.1139
1703	PRKRIP1	3	3090	0.0009699	22	8164	0.0027	ctrl	0.1139
1704	CLDN16	3	3090	0.0009699	22	8164	0.0027	ctrl	0.1139
1705	PPIL6	3	3090	0.0009699	22	8164	0.0027	ctrl	0.1139
1706	TOR1B	3	3090	0.0009699	22	8164	0.0027	ctrl	0.1139
1707	NPEPL1	3	3090	0.0009699	22	8164	0.0027	ctrl	0.1139
1708	OR8J3	3	3090	0.0009699	22	8164	0.0027	ctrl	0.1139
1709	ZBTB42	3	3090	0.0009699	22	8164	0.0027	ctrl	0.1139
1710	ZNF140	3	3090	0.0009699	22	8164	0.0027	ctrl	0.1139
1711	CCDC39	20	3073	0.0065	80	8106	0.0098	ctrl	0.1143
1712	FANCM	41	3052	0.0133	145	8041	0.0177	ctrl	0.1149
1713	ASNSD1	11	3082	0.0036	51	8135	0.0062	ctrl	0.115
1714	MTG1	11	3082	0.0036	51	8135	0.0062	ctrl	0.115
1715	ZNF224	11	3082	0.0036	51	8135	0.0062	ctrl	0.115
1716	MAB21L2	8	3085	0.0026	10	8176	0.0012	case	0.1156
1717	ADPRM	8	3085	0.0026	10	8176	0.0012	case	0.1156
1718	CAPZA1	8	3085	0.0026	10	8176	0.0012	case	0.1156
1719	ZPBP	8	3085	0.0026	10	8176	0.0012	case	0.1156
1720	FYTTD1	8	3085	0.0026	10	8176	0.0012	case	0.1156
1721	ACRV1	8	3085	0.0026	10	8176	0.0012	case	0.1156
1722	SLC25A19	8	3085	0.0026	10	8176	0.0012	case	0.1156
1723	DEGS1	8	3085	0.0026	10	8176	0.0012	case	0.1156
1724	FAM162A	8	3085	0.0026	10	8176	0.0012	case	0.1156
1725	USP12	8	3085	0.0026	10	8176	0.0012	case	0.1156
1726	C12orf40	8	3085	0.0026	10	8176	0.0012	case	0.1156
1727	C22orf29	8	3085	0.0026	10	8176	0.0012	case	0.1156
1728	PIK3CA	8	3085	0.0026	10	8176	0.0012	case	0.1156
1729	PTTG1IP	8	3085	0.0026	10	8176	0.0012	case	0.1156
1730	GRXCR1	8	3085	0.0026	10	8176	0.0012	case	0.1156
1731	ARL5C	8	3085	0.0026	10	8176	0.0012	case	0.1156
1732	SRA1	8	3085	0.0026	10	8176	0.0012	case	0.1156
1733	ARID1B	32	3061	0.0103	117	8069	0.0143	ctrl	0.1157
1734	ARHGEF18	17	3076	0.0055	69	8117	0.0084	ctrl	0.116
1735	BRD9	26	3067	0.0084	47	8139	0.0057	case	0.116
1736	ZNF675	26	3067	0.0084	47	8139	0.0057	case	0.116
1737	SPATC1	26	3067	0.0084	47	8139	0.0057	case	0.116
1738	TUT1	26	3067	0.0084	47	8139	0.0057	case	0.116
1739	ANKLE2	17	3076	0.0055	70	8116	0.0086	ctrl	0.1162
1740	EFCAB13	17	3076	0.0055	70	8116	0.0086	ctrl	0.1162
1741	TYK2	39	3054	0.0126	76	8110	0.0093	case	0.1163
1742	MYRIP	14	3079	0.0045	60	8126	0.0073	ctrl	0.1163
1743	ZIC2	0	3093	0	8	8178	0.0009773	ctrl	0.117
1744	B3GNT6	0	3093	0	8	8178	0.0009773	ctrl	0.117
1745	GAL	0	3093	0	8	8178	0.0009773	ctrl	0.117
1746	HDHD1	0	3093	0	8	8178	0.0009773	ctrl	0.117
1747	AP2S1	0	3093	0	8	8178	0.0009773	ctrl	0.117
1748	SAMD13	0	3093	0	8	8178	0.0009773	ctrl	0.117
1749	HS3ST3A1	0	3093	0	8	8178	0.0009773	ctrl	0.117
1750	NKX2-8	0	3093	0	8	8178	0.0009773	ctrl	0.117
1751	RAB39B	0	3093	0	8	8178	0.0009773	ctrl	0.117
1752	FAM163A	0	3093	0	8	8178	0.0009773	ctrl	0.117
1753	RBMS3	0	3093	0	8	8178	0.0009773	ctrl	0.117
1754	TMCO2	0	3093	0	8	8178	0.0009773	ctrl	0.117
1755	CCL19	0	3093	0	8	8178	0.0009773	ctrl	0.117
1756	MREG	0	3093	0	8	8178	0.0009773	ctrl	0.117
1757	IFNG	0	3093	0	8	8178	0.0009773	ctrl	0.117
1758	NGFRAP1	0	3093	0	8	8178	0.0009773	ctrl	0.117
1759	OR2T8	0	3093	0	8	8178	0.0009773	ctrl	0.117
1760	RRAGB	0	3093	0	8	8178	0.0009773	ctrl	0.117
1761	HAND1	0	3093	0	8	8178	0.0009773	ctrl	0.117
1762	UBE2F	0	3093	0	8	8178	0.0009773	ctrl	0.117
1763	SNRNP70	0	3093	0	8	8178	0.0009773	ctrl	0.117
1764	C2orf15	0	3093	0	8	8178	0.0009773	ctrl	0.117
1765	RIPPLY2	0	3093	0	8	8178	0.0009773	ctrl	0.117
1766	CAV1	0	3093	0	8	8178	0.0009773	ctrl	0.117
1767	DPY30	0	3093	0	8	8178	0.0009773	ctrl	0.117
1768	OR14J1	0	3093	0	8	8178	0.0009773	ctrl	0.117
1769	ISG15	0	3093	0	8	8178	0.0009773	ctrl	0.117
1770	TPR	28	3065	0.0091	105	8081	0.0128	ctrl	0.1172
1771	CACNA1G	28	3065	0.0091	105	8081	0.0128	ctrl	0.1172
1772	SUPT6H	40	3053	0.0129	77	8109	0.0094	case	0.1175
1773	SLC7A6	19	3074	0.0061	32	8154	0.0039	case	0.1176
1774	OPTN	19	3074	0.0061	32	8154	0.0039	case	0.1176
1775	MAK	19	3074	0.0061	32	8154	0.0039	case	0.1176
1776	PRKAG3	19	3074	0.0061	32	8154	0.0039	case	0.1176
1777	TRAIP	19	3074	0.0061	32	8154	0.0039	case	0.1176
1778	FCRL3	31	3062	0.01	57	8129	0.007	case	0.118
1779	GRIK1	31	3062	0.01	57	8129	0.007	case	0.118
1780	PLA2G4D	27	3066	0.0087	48	8138	0.0059	case	0.118
1781	KIAA1958	23	3070	0.0074	40	8146	0.0049	case	0.1187
1782	OGDH	23	3070	0.0074	40	8146	0.0049	case	0.1187
1783	MAP3K11	9	3084	0.0029	43	8143	0.0053	ctrl	0.119
1784	LRP3	9	3084	0.0029	43	8143	0.0053	ctrl	0.119
1785	TMEM143	9	3084	0.0029	43	8143	0.0053	ctrl	0.119
1786	CEP170	9	3084	0.0029	43	8143	0.0053	ctrl	0.119
1787	ZNF230	9	3084	0.0029	43	8143	0.0053	ctrl	0.119
1788	DDX25	9	3084	0.0029	43	8143	0.0053	ctrl	0.119
1789	ERBB2	35	3058	0.0113	67	8119	0.0082	case	0.1194
1790	TRPM5	35	3058	0.0113	67	8119	0.0082	case	0.1194
1791	F5	56	3037	0.0181	115	8071	0.014	case	0.1202
1792	GMCL1	11	3082	0.0036	15	8171	0.0018	case	0.1202
1793	NME5	11	3082	0.0036	15	8171	0.0018	case	0.1202
1794	C6orf118	11	3082	0.0036	15	8171	0.0018	case	0.1202
1795	FXR2	11	3082	0.0036	15	8171	0.0018	case	0.1202
1796	SLC25A30	11	3082	0.0036	15	8171	0.0018	case	0.1202
1797	PARP11	11	3082	0.0036	15	8171	0.0018	case	0.1202
1798	KCNK10	11	3082	0.0036	15	8171	0.0018	case	0.1202
1799	CYP4A22	11	3082	0.0036	15	8171	0.0018	case	0.1202
1800	CSN2	11	3082	0.0036	15	8171	0.0018	case	0.1202
1801	PRL	11	3082	0.0036	15	8171	0.0018	case	0.1202
1802	TEDDM1	11	3082	0.0036	15	8171	0.0018	case	0.1202
1803	STAT5B	11	3082	0.0036	15	8171	0.0018	case	0.1202
1804	ZC2HC1A	11	3082	0.0036	15	8171	0.0018	case	0.1202
1805	HOXB3	11	3082	0.0036	15	8171	0.0018	case	0.1202
1806	BIRC8	11	3082	0.0036	15	8171	0.0018	case	0.1202
1807	ZBTB16	11	3082	0.0036	15	8171	0.0018	case	0.1202
1808	IQSEC2	11	3082	0.0036	15	8171	0.0018	case	0.1202
1809	MCM7	21	3072	0.0068	82	8104	0.01	ctrl	0.1204
1810	BMS1	21	3072	0.0068	82	8104	0.01	ctrl	0.1204
1811	STPG2	20	3073	0.0065	33	8153	0.004	case	0.1211
1812	ZMYM2	20	3073	0.0065	33	8153	0.004	case	0.1211
1813	GALNT10	20	3073	0.0065	33	8153	0.004	case	0.1211
1814	WSCD1	20	3073	0.0065	33	8153	0.004	case	0.1211
1815	CALD1	20	3073	0.0065	33	8153	0.004	case	0.1211
1816	MANBA	21	3072	0.0068	83	8103	0.0101	ctrl	0.1213
1817	ZNF608	21	3072	0.0068	83	8103	0.0101	ctrl	0.1213
1818	LRP4	38	3055	0.0123	134	8052	0.0164	ctrl	0.1214
1819	TUBGCP5	27	3066	0.0087	49	8137	0.006	case	0.1216
1820	SPECC1	27	3066	0.0087	49	8137	0.006	case	0.1216
1821	ZBTB11	27	3066	0.0087	49	8137	0.006	case	0.1216
1822	PPAPDC3	16	3077	0.0052	26	8160	0.0032	case	0.1218
1823	IK	16	3077	0.0052	26	8160	0.0032	case	0.1218
1824	AGPAT9	16	3077	0.0052	26	8160	0.0032	case	0.1218
1825	KIF23	16	3077	0.0052	26	8160	0.0032	case	0.1218
1826	IFIT1	16	3077	0.0052	26	8160	0.0032	case	0.1218
1827	TSEN54	16	3077	0.0052	26	8160	0.0032	case	0.1218
1828	NUB1	16	3077	0.0052	26	8160	0.0032	case	0.1218
1829	CATSPER4	16	3077	0.0052	26	8160	0.0032	case	0.1218
1830	SIK1	16	3077	0.0052	26	8160	0.0032	case	0.1218
1831	KIAA0513	16	3077	0.0052	26	8160	0.0032	case	0.1218
1832	FBXW12	16	3077	0.0052	26	8160	0.0032	case	0.1218
1833	ZNF683	16	3077	0.0052	26	8160	0.0032	case	0.1218
1834	LRP2BP	16	3077	0.0052	26	8160	0.0032	case	0.1218
1835	SLC2A9	16	3077	0.0052	26	8160	0.0032	case	0.1218
1836	PIWIL3	25	3068	0.0081	95	8091	0.0116	ctrl	0.1223
1837	NFKBIZ	5	3088	0.0016	28	8158	0.0034	ctrl	0.1224
1838	RGS14	5	3088	0.0016	28	8158	0.0034	ctrl	0.1224
1839	LRRC71	5	3088	0.0016	28	8158	0.0034	ctrl	0.1224
1840	CHRM4	5	3088	0.0016	28	8158	0.0034	ctrl	0.1224
1841	ADRB2	5	3088	0.0016	28	8158	0.0034	ctrl	0.1224
1842	NDUFA11	5	3088	0.0016	28	8158	0.0034	ctrl	0.1224
1843	GALNTL5	5	3088	0.0016	28	8158	0.0034	ctrl	0.1224
1844	NR4A2	5	3088	0.0016	28	8158	0.0034	ctrl	0.1224
1845	OR2M2	5	3088	0.0016	28	8158	0.0034	ctrl	0.1224
1846	TUBA3C	5	3088	0.0016	28	8158	0.0034	ctrl	0.1224
1847	RELB	5	3088	0.0016	28	8158	0.0034	ctrl	0.1224
1848	ZNF566	5	3088	0.0016	28	8158	0.0034	ctrl	0.1224
1849	CHERP	5	3088	0.0016	28	8158	0.0034	ctrl	0.1224
1850	CCDC109B	5	3088	0.0016	28	8158	0.0034	ctrl	0.1224
1851	CCR7	5	3088	0.0016	28	8158	0.0034	ctrl	0.1224
1852	FBXO16	5	3088	0.0016	29	8157	0.0035	ctrl	0.1224
1853	FBXO43	5	3088	0.0016	29	8157	0.0035	ctrl	0.1224
1854	HIST1H4B	5	3088	0.0016	29	8157	0.0035	ctrl	0.1224
1855	TFDP3	5	3088	0.0016	29	8157	0.0035	ctrl	0.1224
1856	C10orf118	5	3088	0.0016	29	8157	0.0035	ctrl	0.1224
1857	TAS2R1	5	3088	0.0016	29	8157	0.0035	ctrl	0.1224
1858	JAM3	5	3088	0.0016	29	8157	0.0035	ctrl	0.1224
1859	KLK4	5	3088	0.0016	29	8157	0.0035	ctrl	0.1224
1860	PYHIN1	5	3088	0.0016	29	8157	0.0035	ctrl	0.1224
1861	RFXANK	5	3088	0.0016	29	8157	0.0035	ctrl	0.1224
1862	TMEM194B	5	3088	0.0016	29	8157	0.0035	ctrl	0.1224
1863	SLC17A9	5	3088	0.0016	29	8157	0.0035	ctrl	0.1224
1864	UXS1	5	3088	0.0016	29	8157	0.0035	ctrl	0.1224
1865	CRISPLD1	7	3086	0.0023	36	8150	0.0044	ctrl	0.1227
1866	FYB	7	3086	0.0023	36	8150	0.0044	ctrl	0.1227
1867	DPH7	7	3086	0.0023	36	8150	0.0044	ctrl	0.1227
1868	EWSR1	7	3086	0.0023	36	8150	0.0044	ctrl	0.1227
1869	RAI14	7	3086	0.0023	36	8150	0.0044	ctrl	0.1227
1870	NRG2	7	3086	0.0023	36	8150	0.0044	ctrl	0.1227
1871	CPNE8	7	3086	0.0023	36	8150	0.0044	ctrl	0.1227
1872	MARS2	7	3086	0.0023	36	8150	0.0044	ctrl	0.1227
1873	COX10	7	3086	0.0023	36	8150	0.0044	ctrl	0.1227
1874	ZNF514	7	3086	0.0023	36	8150	0.0044	ctrl	0.1227
1875	ITGB4	63	3030	0.0204	131	8055	0.016	case	0.1227
1876	CRIM1	18	3075	0.0058	72	8114	0.0088	ctrl	0.1235
1877	SH3BP4	18	3075	0.0058	72	8114	0.0088	ctrl	0.1235
1878	NLRP9	41	3052	0.0133	80	8106	0.0098	case	0.1238
1879	KCNS1	2	3091	0.0006466	17	8169	0.0021	ctrl	0.1238
1880	DPCD	2	3091	0.0006466	17	8169	0.0021	ctrl	0.1238
1881	CLNS1A	2	3091	0.0006466	17	8169	0.0021	ctrl	0.1238
1882	OR51E1	2	3091	0.0006466	17	8169	0.0021	ctrl	0.1238
1883	OR1E2	2	3091	0.0006466	17	8169	0.0021	ctrl	0.1238
1884	COPRS	2	3091	0.0006466	17	8169	0.0021	ctrl	0.1238
1885	RNASEK	2	3091	0.0006466	17	8169	0.0021	ctrl	0.1238
1886	TAS2R40	2	3091	0.0006466	17	8169	0.0021	ctrl	0.1238
1887	WWTR1	2	3091	0.0006466	17	8169	0.0021	ctrl	0.1238
1888	CYBA	2	3091	0.0006466	17	8169	0.0021	ctrl	0.1238
1889	SFR1	2	3091	0.0006466	17	8169	0.0021	ctrl	0.1238
1890	ANKRD46	2	3091	0.0006466	17	8169	0.0021	ctrl	0.1238
1891	LIN7B	2	3091	0.0006466	17	8169	0.0021	ctrl	0.1238
1892	IL25	2	3091	0.0006466	17	8169	0.0021	ctrl	0.1238
1893	TMEM30A	2	3091	0.0006466	17	8169	0.0021	ctrl	0.1238
1894	SAC3D1	2	3091	0.0006466	17	8169	0.0021	ctrl	0.1238
1895	LY86	2	3091	0.0006466	17	8169	0.0021	ctrl	0.1238
1896	OR11L1	2	3091	0.0006466	17	8169	0.0021	ctrl	0.1238
1897	APOBEC1	2	3091	0.0006466	17	8169	0.0021	ctrl	0.1238
1898	SEC62	2	3091	0.0006466	17	8169	0.0021	ctrl	0.1238
1899	DSPP	18	3075	0.0058	73	8113	0.0089	ctrl	0.1243
1900	RIMS2	18	3075	0.0058	73	8113	0.0089	ctrl	0.1243
1901	CHAF1A	12	3081	0.0039	53	8133	0.0065	ctrl	0.1245
1902	ZDHHC5	12	3081	0.0039	53	8133	0.0065	ctrl	0.1245
1903	SLC45A1	12	3081	0.0039	53	8133	0.0065	ctrl	0.1245
1904	CEP89	12	3081	0.0039	53	8133	0.0065	ctrl	0.1245
1905	PLAA	12	3081	0.0039	52	8134	0.0064	ctrl	0.1246
1906	TUBGCP3	12	3081	0.0039	52	8134	0.0064	ctrl	0.1246
1907	ALDH7A1	12	3081	0.0039	52	8134	0.0064	ctrl	0.1246
1908	INTS9	12	3081	0.0039	52	8134	0.0064	ctrl	0.1246
1909	CSF3R	12	3081	0.0039	52	8134	0.0064	ctrl	0.1246
1910	NARFL	12	3081	0.0039	52	8134	0.0064	ctrl	0.1246
1911	NLRP3	12	3081	0.0039	52	8134	0.0064	ctrl	0.1246
1912	DNAH2	134	2959	0.0433	302	7884	0.0369	case	0.1251
1913	DOT1L	15	3078	0.0048	62	8124	0.0076	ctrl	0.1253
1914	HIRIP3	15	3078	0.0048	62	8124	0.0076	ctrl	0.1253
1915	DTX2	17	3076	0.0055	27	8159	0.0033	case	0.1256
1916	GRB10	17	3076	0.0055	27	8159	0.0033	case	0.1256
1917	SMG9	17	3076	0.0055	27	8159	0.0033	case	0.1256
1918	SLC19A3	17	3076	0.0055	27	8159	0.0033	case	0.1256
1919	CSF2RB	15	3078	0.0048	63	8123	0.0077	ctrl	0.1257
1920	ANKS1B	20	3073	0.0065	34	8152	0.0042	case	0.1259
1921	XPOT	20	3073	0.0065	34	8152	0.0042	case	0.1259
1922	CAPN7	20	3073	0.0065	34	8152	0.0042	case	0.1259
1923	GARNL3	20	3073	0.0065	34	8152	0.0042	case	0.1259
1924	TIMP1	0	3093	0	9	8177	0.0011	ctrl	0.126
1925	RAB3C	0	3093	0	9	8177	0.0011	ctrl	0.126
1926	YKT6	0	3093	0	9	8177	0.0011	ctrl	0.126
1927	LAGE3	0	3093	0	9	8177	0.0011	ctrl	0.126
1928	C6orf163	0	3093	0	9	8177	0.0011	ctrl	0.126
1929	SFTA3	0	3093	0	9	8177	0.0011	ctrl	0.126
1930	SET	0	3093	0	9	8177	0.0011	ctrl	0.126
1931	APOO	0	3093	0	9	8177	0.0011	ctrl	0.126
1932	C15orf60	0	3093	0	9	8177	0.0011	ctrl	0.126
1933	HIC1	0	3093	0	9	8177	0.0011	ctrl	0.126
1934	PLAC8	0	3093	0	9	8177	0.0011	ctrl	0.126
1935	OR8B3	0	3093	0	9	8177	0.0011	ctrl	0.126
1936	VPREB1	0	3093	0	9	8177	0.0011	ctrl	0.126
1937	CLEC2B	0	3093	0	9	8177	0.0011	ctrl	0.126
1938	ZFP36L1	0	3093	0	9	8177	0.0011	ctrl	0.126
1939	KCNB2	14	3079	0.0045	21	8165	0.0026	case	0.1266
1940	SUN3	14	3079	0.0045	21	8165	0.0026	case	0.1266
1941	SLC7A1	14	3079	0.0045	21	8165	0.0026	case	0.1266
1942	FYN	14	3079	0.0045	21	8165	0.0026	case	0.1266
1943	PPT1	14	3079	0.0045	21	8165	0.0026	case	0.1266
1944	FUT8	14	3079	0.0045	21	8165	0.0026	case	0.1266
1945	ORC4	14	3079	0.0045	21	8165	0.0026	case	0.1266
1946	PARP6	14	3079	0.0045	21	8165	0.0026	case	0.1266
1947	FOXP2	14	3079	0.0045	21	8165	0.0026	case	0.1266
1948	RASIP1	14	3079	0.0045	21	8165	0.0026	case	0.1266
1949	MTDH	14	3079	0.0045	21	8165	0.0026	case	0.1266
1950	MMRN1	14	3079	0.0045	21	8165	0.0026	case	0.1266
1951	ZADH2	14	3079	0.0045	21	8165	0.0026	case	0.1266
1952	OR6C1	14	3079	0.0045	21	8165	0.0026	case	0.1266
1953	MTERFD2	14	3079	0.0045	21	8165	0.0026	case	0.1266
1954	SMG5	32	3061	0.0103	60	8126	0.0073	case	0.1266
1955	ZNF135	24	3069	0.0078	42	8144	0.0051	case	0.1267
1956	NINL	30	3063	0.0097	110	8076	0.0134	ctrl	0.1268
1957	AHI1	22	3071	0.0071	84	8102	0.0103	ctrl	0.127
1958	UNC13D	22	3071	0.0071	85	8101	0.0104	ctrl	0.1271
1959	EML5	26	3067	0.0084	97	8089	0.0118	ctrl	0.1276
1960	PI4KA	26	3067	0.0084	97	8089	0.0118	ctrl	0.1276
1961	GPR155	28	3065	0.0091	51	8135	0.0062	case	0.128
1962	COL1A2	28	3065	0.0091	51	8135	0.0062	case	0.128
1963	KIAA0319L	28	3065	0.0091	51	8135	0.0062	case	0.128
1964	PLXNA1	47	3046	0.0152	94	8092	0.0115	case	0.1281
1965	KCNS2	2	3091	0.0006466	18	8168	0.0022	ctrl	0.1282
1966	RNF128	2	3091	0.0006466	18	8168	0.0022	ctrl	0.1282
1967	STRBP	2	3091	0.0006466	18	8168	0.0022	ctrl	0.1282
1968	ICOSLG	2	3091	0.0006466	18	8168	0.0022	ctrl	0.1282
1969	LFNG	2	3091	0.0006466	18	8168	0.0022	ctrl	0.1282
1970	C17orf66	2	3091	0.0006466	18	8168	0.0022	ctrl	0.1282
1971	PSPH	2	3091	0.0006466	18	8168	0.0022	ctrl	0.1282
1972	WDR26	2	3091	0.0006466	18	8168	0.0022	ctrl	0.1282
1973	CSTF3	2	3091	0.0006466	18	8168	0.0022	ctrl	0.1282
1974	TAF9	2	3091	0.0006466	18	8168	0.0022	ctrl	0.1282
1975	PSMB1	2	3091	0.0006466	18	8168	0.0022	ctrl	0.1282
1976	OR6N2	2	3091	0.0006466	18	8168	0.0022	ctrl	0.1282
1977	FGFR1OP2	2	3091	0.0006466	18	8168	0.0022	ctrl	0.1282
1978	TRIM13	2	3091	0.0006466	18	8168	0.0022	ctrl	0.1282
1979	POLE3	2	3091	0.0006466	18	8168	0.0022	ctrl	0.1282
1980	GJB5	2	3091	0.0006466	18	8168	0.0022	ctrl	0.1282
1981	BLVRB	2	3091	0.0006466	18	8168	0.0022	ctrl	0.1282
1982	CMTM4	2	3091	0.0006466	18	8168	0.0022	ctrl	0.1282
1983	HTATIP2	2	3091	0.0006466	18	8168	0.0022	ctrl	0.1282
1984	CREB1	2	3091	0.0006466	18	8168	0.0022	ctrl	0.1282
1985	SSR3	2	3091	0.0006466	18	8168	0.0022	ctrl	0.1282
1986	TENM4	71	3022	0.023	151	8035	0.0184	case	0.1287
1987	ABCC11	53	3040	0.0171	108	8078	0.0132	case	0.13
1988	DOCK5	47	3046	0.0152	95	8091	0.0116	case	0.1304
1989	ERBB2IP	32	3061	0.0103	61	8125	0.0075	case	0.1304
1990	C6orf52	3	3090	0.0009699	2	8184	0.0002443	case	0.1306
1991	TMEM200C	3	3090	0.0009699	2	8184	0.0002443	case	0.1306
1992	GPR150	3	3090	0.0009699	2	8184	0.0002443	case	0.1306
1993	NUP62CL	3	3090	0.0009699	2	8184	0.0002443	case	0.1306
1994	ACTB	3	3090	0.0009699	2	8184	0.0002443	case	0.1306
1995	C14orf177	3	3090	0.0009699	2	8184	0.0002443	case	0.1306
1996	FAM3A	3	3090	0.0009699	2	8184	0.0002443	case	0.1306
1997	FOXR2	3	3090	0.0009699	2	8184	0.0002443	case	0.1306
1998	DYNLT3	3	3090	0.0009699	2	8184	0.0002443	case	0.1306
[truncated: 16,654 more rows]
